# Supplementary material for: Therapeutic effects of exercise interventions for patients with chronic kidney disease: an umbrella review of systematic reviews and meta-analyses
Source: PubMed Central journal article supplement — BMJ Open. 2022 Sep 19;12(9):e054887. doi: 10.1136/bmjopen-2021-054887 (PMC9486234; doi:10.1136/bmjopen-2021-054887), 2022-09-19
Supplement: bmjopen-2021-054887.draft_revisions.pdf [file bmjopen-2021-054887.draft_revisions.pdf]

# BMJ Open

BMJ Open is committed to open peer review. As part of this commitment we make the peer review history of every article we publish publicly available.

When an article is published we post the peer reviewers' comments and the authors' responses online. We also post the versions of the paper that were used during peer review. These are the versions that the peer review comments apply to.

The versions of the paper that follow are the versions that were submitted during the peer review process. They are not the versions of record or the final published versions. They should not be cited or distributed as the published version of this manuscript.

BMJ Open is an open access journal and the full, final, typeset and author-corrected version of record of the manuscript is available on our site with no access controls, subscription charges or pay-per-view fees (<http://bmjopen.bmj.com>).

If you have any questions on BMJ Open's open peer review process please email [info.bmjopen@bmj.com](mailto:info.bmjopen@bmj.com)

# BMJ Open

## Therapeutic effects of exercise interventions for patients with chronic kidney disease: an umbrella review of systematic reviews and meta-analyses

|                               |                                                                                                                                                                                                                                                                                                                                                                                                                                                                                                                                |
|-------------------------------|--------------------------------------------------------------------------------------------------------------------------------------------------------------------------------------------------------------------------------------------------------------------------------------------------------------------------------------------------------------------------------------------------------------------------------------------------------------------------------------------------------------------------------|
| Journal:                      | <i>BMJ Open</i>                                                                                                                                                                                                                                                                                                                                                                                                                                                                                                                |
| Manuscript ID                 | bmjopen-2021-054887                                                                                                                                                                                                                                                                                                                                                                                                                                                                                                            |
| Article Type:                 | Original research                                                                                                                                                                                                                                                                                                                                                                                                                                                                                                              |
| Date Submitted by the Author: | 12-Jul-2021                                                                                                                                                                                                                                                                                                                                                                                                                                                                                                                    |
| Complete List of Authors:     | Zhang, Fan; Long Hua Hospital, Department of Nephrology<br>Zhang, Huachun; Long Hua Hospital, Department of Nephrology<br>Bai, Yan; Shanghai University of Traditional Chinese Medicine, Longhua Clinical Medical College<br>Zhao, Xing; Shanghai University of Traditional Chinese Medicine, Longhua Clinical Medical College<br>Huang, Liuyan; Shanghai University of Traditional Chinese Medicine<br>Wang, Weiqiong; Long Hua Hospital, Blood Purification Centre<br>Zhou, Wenqin; Long Hua Hospital, Department of Nursing |
| Keywords:                     | Nephrology < INTERNAL MEDICINE, Rehabilitation medicine < INTERNAL MEDICINE, Chronic renal failure < NEPHROLOGY                                                                                                                                                                                                                                                                                                                                                                                                                |
|                               |                                                                                                                                                                                                                                                                                                                                                                                                                                                                                                                                |

SCHOLARONE™  
Manuscripts

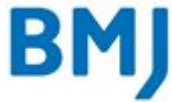

I, the Submitting Author has the right to grant and does grant on behalf of all authors of the Work (as defined in the below author licence), an exclusive licence and/or a non-exclusive licence for contributions from authors who are: i) UK Crown employees; ii) where BMJ has agreed a CC-BY licence shall apply, and/or iii) in accordance with the terms applicable for US Federal Government officers or employees acting as part of their official duties; on a worldwide, perpetual, irrevocable, royalty-free basis to BMJ Publishing Group Ltd ("BMJ") its licensees and where the relevant Journal is co-owned by BMJ to the co-owners of the Journal, to publish the Work in this journal and any other BMJ products and to exploit all rights, as set out in our [licence](#).

The Submitting Author accepts and understands that any supply made under these terms is made by BMJ to the Submitting Author unless you are acting as an employee on behalf of your employer or a postgraduate student of an affiliated institution which is paying any applicable article publishing charge ("APC") for Open Access articles. Where the Submitting Author wishes to make the Work available on an Open Access basis (and intends to pay the relevant APC), the terms of reuse of such Open Access shall be governed by a Creative Commons licence – details of these licences and which [Creative Commons](#) licence will apply to this Work are set out in our licence referred to above.

Other than as permitted in any relevant BMJ Author's Self Archiving Policies, I confirm this Work has not been accepted for publication elsewhere, is not being considered for publication elsewhere and does not duplicate material already published. I confirm all authors consent to publication of this Work and authorise the granting of this licence.

1  
2  
3 **Therapeutic effects of exercise interventions for patients with chronic kidney disease: an**  
4 **umbrella review of systematic reviews and meta-analyses**  
5

6  
7 Fan Zhang<sup>1</sup>, Huachun Zhang<sup>2</sup>, Yan Bai<sup>3</sup>, Xing Zhao<sup>3</sup>, Liuyan Huang<sup>1</sup>, Weiqiong Wang<sup>4</sup>, Wenqin  
8 Zhou<sup>2</sup>.  
9

10  
11 1 Department of Nephrology, Longhua Hospital Shanghai University of Traditional Chinese  
12 Medicine, ShangHai, 200032, China.  
13

14  
15 2 Department of Nursing, Longhua Hospital Shanghai University of Traditional Chinese  
16 Medicine, ShangHai, 200032, China.  
17

18  
19 3 Longhua Clinical Medical College, Shanghai University of Traditional Chinese Medicine,  
20 Shang Hai, 200032, China.  
21

22  
23 4 Blood Purification Centre, Longhua Hospital Shanghai University of Traditional Chinese  
24 Medicine, ShangHai, 200032, China.  
25

26 **Running Head:** Exercise for chronic kidney disease  
27

28 **First author**  
29

30 Fan Zhang, Department of Nephrology, No. 725, Wan Ping Nan Road, Xuhui District, Shanghai,  
31 200032, P.R. China E-mail: [fan\\_zhang1993@163.com](mailto:fan_zhang1993@163.com)  
32

33  
34 **Corresponding author**  
35

36 Huachun Zhang, Department of Nursing, No. 725, Wan Ping Nan Road, Xuhui District, Shanghai,  
37 200032, P.R. China, E-mail: [lhhky@163.com](mailto:lhhky@163.com)  
38  
39  
40  
41  
42  
43  
44  
45  
46  
47  
48  
49  
50  
51  
52  
53  
54  
55  
56  
57  
58  
59  
60

## ABSTRACT

**Objective** To conduct an overview of meta-analyses evaluating the impact of exercise interventions for improving health outcome in patients with chronic kidney disease (CKD).

**Design** An umbrella review of systematic review and meta-analyses of intervention trials was performed.

**Data sources** PubMed, the Web of Science, Embase, and the Cochrane Database of Systematic Reviews were searched for relevant articles.

**Eligibility criteria for selecting studies** Eligible meta-analyses compared the effects of usual care with and without exercise in CKD patients. Health outcomes included those related to cardiovascular risk factors, physical fitness, dialysis-related symptoms, and health-related quality of life. Systematic reviews and meta-analyses that included fewer than three RCTs or fewer than 100 participants were excluded from the analysis.

**Results** A total of 31 eligible systematic reviews and meta-analyses were included that assessed 120 outcomes. For physical fitness, there was a moderate effect size for cardiorespiratory fitness, muscle strength, and body composition, and a small effect size for muscle endurance. The effect sizes for cardiovascular risk factors, dialysis-related symptoms, and health-related quality of life outcomes were small. Most outcomes were scored as low or very low quality according to the Grading of Recommendations Assessment, Development and Evaluation framework.

**Conclusion** Exercise appears to be a safe way to affect concomitant cardiovascular risk factors, such as blood pressure, improve physical fitness and health-related quality of life, and reduce dialysis-related symptoms in CKD patients.

**Ethics approval statement** Ethics approval are not required as no private information from individuals is collected.

**Dissemination** The results will be published in a peer-reviewed journal or disseminated in relevant conferences.

**Key words:** Exercise, Chronic Kidney Disease, Systematic Review, Meta-Analyses

**PROSPERO registration number** CRD42020223591.

**Strengths and limitations of this study**

- 1) This overview provide a comprehensive summary of the therapeutic effects of exercise interventions for patients with chronic kidney disease.
- 2) Another strength of this overview allows us to identify the evidence base effect size are high or low.
- 3) The limitation of this overview is that language bias may exist in this review because the search strategy was limited to English.

For peer review only

## INTRODUCTION

Chronic kidney disease (CKD) is a long-term condition characterized by the gradual loss of renal function over time.<sup>1</sup> In the past 30 years, the mortality attributed to CKD increased by 41.5%, a percentage rate that exceeds several cancers and cardiovascular diseases.<sup>2</sup> With the increasing incidence of hypertension, diabetes, and obesity, this number will continue to rise.<sup>3,4</sup> CKD patients experience a high symptom burden with progressively impaired physical performance, leading to decreased kidney function, lower health-related quality of life (HRQOL), increased risk of cardiovascular events, and increased all-cause mortality.<sup>5,6</sup>

Renal rehabilitation is a multifaceted intervention program. Rehabilitation consists of exercise interventions, diet control, fluid management, and psychological support to alleviate physical/mental deficiencies caused by kidney disease and renal replacement therapy, in order to improve disease prognosis and to prolong life expectancy.<sup>7</sup> Since exercise is the core of renal rehabilitation, there is an increasing number of systematic reviews and meta-analyses investigating the influence of exercise on health outcomes in CKD patients.<sup>8</sup> Although some researchers and guidelines recommend that healthcare providers prescribe exercise for CKD patients,<sup>9-12</sup> the results of meta-analyses of exercise in CKD patients are inconsistent.

This umbrella review aims to assess the therapeutic effects of exercise regarding cardiovascular risk factors, physical fitness, dialysis-related symptoms, and HRQOL in CKD patients that are summarized in systematic reviews and meta-analyses.

## METHODS AND ANALYSIS

This umbrella review follows the Preferred Reporting Items for Systematic Reviews and Meta-Analyses (PRISMA) guidelines.<sup>13</sup> The review was prospectively registered (PROSPERO: CRD42020223591) and the protocol for this review was published.<sup>14</sup>

### Patient and public involvement

Patients and/or the public were not involved in the design, or conduct, or reporting, or dissemination plans of this research.

### Literature Search

A comprehensive search strategy was performed to identify systematic reviews and meta-analyses of CKD patients that compared usual care procedures with and without exercise interventions. PubMed, Embase, the Cochrane Database of Systematic Reviews (CDSR), and the Web of Science were searched for systematic reviews and meta-analyses from inception to March 9th, 2021. The detailed search strategy is summarized in Supplementary Table S1. The references of existing systematic reviews were also screened. Any reviews considered potentially relevant by authors were retrieved for further consideration.

## Eligibility Criteria

Eligible systematic reviews and meta-analyses included those 1) where patients were diagnosed with CKD at various stages of treatment; 2) that compared exercise interventions with sham/no exercise or usual/standard care; 3) that reported outcomes on at least one of the following: cardiovascular risk factors, physical fitness, dialysis-related symptoms, and HRQOL. The methods to assess each outcome was shown in Supplement Figure S1; and 4) that were systematic reviews with meta-analysis of intervention trials (such as randomized controlled trials and quasi-experimental studies). Meta-analysis that included less than three studies or less than 100 participants were excluded. For duplicate literature, the article with most comprehensive data was selected. The language was restricted to English. Letters to the editor, trial protocols, and conference abstracts were excluded.

## Study selection

Two independent authors screened all titles and abstracts compiled from the search results. Each paper was examined for appropriate eligibility criteria and a third author resolved disagreements.

## Data extraction

Requisite data were extracted independently by two independent authors into a standardized format that included: 1) author, 2) publication year, 3) stage of CKD, 4) the number of included studies and participants, 5) exercise type, 6) exercise mode (intradialytic or interdialytic), 7) standardized mean difference (SMD) or mean difference (MD) with corresponding 95% confidence intervals (CI) for each outcome, 8) *P*-values, 9) *I*<sup>2</sup> values, and 10) exercise-related adverse events.

## Risk of bias assessment

AMSTAR-2 (A Measurement Tool to Assess Systematic Reviews-2) was used to assess the risk of bias among the included systematic reviews.<sup>15</sup> This checklist contains 16 items, and each item was answered with a “yes” (1 point), “partial yes” (0.5 points), or “no” (0 points). A percentage score was calculated for each study based on the total score as the numerator and the maximum 16 points as the denominator. A meta-analysis scoring  $\geq 80\%$  was classified as high quality, those scoring 40-79% as medium quality, and those scoring  $< 40\%$  as low quality.<sup>16</sup> Risk of bias assessment was performed independently by two authors, and disagreement were resolved through discussions.

## Data analysis

For each outcome, the summary effect size from each meta-analysis was analyzed qualitatively based on the SMD and its 95% CI. If they were not presented as SMD in the original meta-analysis, Review Manager V.5.3 was used to convert SMD outcomes. If data could not be



converted into SMD, we contacted the authors of the meta-analysis for the data. Effects were considered small (SMD < 0.50), moderate (SMD from 0.50 to 0.79), and large (SMD ≥ 0.80).<sup>17</sup>  $I^2$  values were interpreted as follows: ≤25% indicate low heterogeneity, 25% <  $I^2$  ≤ 50% indicate mild heterogeneity, 50% <  $I^2$  ≤ 75% indicate moderate heterogeneity, and >75% indicate high heterogeneity.<sup>18</sup>

The level of evidence for each meta-analysis was evaluated using the Grading of Recommendations Assessment, Development and Evaluation (GRADE) system.<sup>19</sup> The quality of evidence was assessed using five domains: risk of bias, inconsistency, indirectness, imprecision, and publication bias. Beginning with an initial score of 4 points, the score for each of these five domains was reduced accordingly: “not reported (-1)”, “serious (-1)”, “very serious (-2)”, or “neutral (0)”. Studies were rated as high (4 points), moderate (3 points), low (2 points), or very low (≤ 1 point) using the GRADE system. The GRADE assessment was conducted independently by two authors. Any differences were resolved by discussion or adjudication by a third author. The incidence of adverse events was based on the number of reported divided by the patients in the exercise group.

## RESULTS

### Characteristics of the meta-analyses

The search identified 2305 potential articles, of which 648 were duplicates. After reading the title and abstract, 1598 papers were excluded and 28 were excluded after full-text review resulting in 31 final studies.<sup>20-50</sup> A flow diagram of the study selection illustrates the selection process (Supplement Figure S2). The detail of reasons for excluded articles were listed in Supplementary Table S2.

The 31 included systematic reviews and meta-analyses were published from September, 2011 through March, 2021. The number of included studies assessed in the articles ranged from 3 to 24 with a mean of 8 studies. The sample sizes in the studies ranged from 106 to 874 participants with a mean of 304. The characteristics of the included meta-analyses were shown in Supplement Table S3. SMD data from four papers could not be obtained from the authors and the data of their effect size was presented as MD.<sup>25 26 37 43</sup>

The assessment of the methodological quality of the included meta-analyses was determined and the AMSTAR-2 scores ranged from 34.4% to 100.0% with a mean score of 68.0%. Seven (22.6%) systematic reviews were rated of high quality while 23 (74.2%) were rated of medium quality, and just one (0.3%) was rated as low quality (Supplement Table S4).

Of the GRADE evidence quality of the 120 outcomes, 1.7% (2 / 120) reported evidence of high quality, 17.5% (21 / 120) reported evidence of moderate quality, 20.0% (24 / 120) reported evidence of low quality, and 60.8% (73 / 120) reported evidence of very low quality (Supplement

Table S5).

### Cardiovascular risk factor

There were 25 meta-analyses (reported in 13 articles) investigating the effect of exercise on cardiovascular risk factors (systolic and diastolic blood pressure) in CKD patients.<sup>23 26 29-31 37 38 40 43-46 49</sup> Of which, the number of studies ranged from 3 to 12 with a mean of 314 participants (range from 198 to 514) were included in each meta-analysis (Table 1).

The effect of exercise on systolic blood pressure was investigated in 13 meta-analyses with a mild heterogeneity (average  $I^2 = 36.1\%$ ),<sup>23 26 29-31 37 38 40 43-46 49</sup> and 6 reported a positive statistically significant outcome.<sup>26 29 38 40 46 49</sup> Of the 13 meta-analyses, 9 reported a small effect size,<sup>23 29-31 38 40 44 45 49</sup> and one reported moderate.<sup>46</sup> GRADE assessment of quality indicated the overall evidence as being very low (10 meta-analyses<sup>23 26 29 30 38 40 43-46</sup>), low (2 meta-analyses<sup>31 37</sup>), and moderate (1 meta-analysis<sup>49</sup>). See Table 1.

The effect of exercise on diastolic blood pressure was investigated in 12 meta-analyses with a mild heterogeneity (average  $I^2=49.1\%$ ),<sup>23 26 29-31 37 38 40 43-45 49</sup> and 2 reported a positive statistically significant outcome.<sup>38 40</sup> Of the 12 meta-analyses, 9 reported a small effect size,<sup>23 29-31 38 40 44 45 49</sup> and all were graded as low or very low quality of evidence (Table 1).

### Cardiorespiratory fitness

There were 34 meta-analyses (reported in 21 articles) that investigated the effects of exercise on cardiorespiratory fitness in CKD patients using a peak oxygen uptake (18 of 34), 6-minute walk test (14 of 34), or aerobic capacity (2 of 34). The meta-analyses included a mean of 9 studies (ranging from 5 to 20) and a mean of 330 participants (ranging from 179 to 504). See Table 2.

The effect of exercise on peak oxygen consumption was investigated in 18 meta-analyses (reported in 17 articles) with a mild heterogeneity (average  $I^2=42.2\%$ ),<sup>20 21 23 24 26 28 31 34-38 40 41 44 46 47</sup> and 16 reported positive statistically significant outcomes.<sup>20 21 24 26 28 31 34 35 37 38 40 41 44 46 47</sup> Of the 18 meta-analyses, 3 reported a low effect size,<sup>23 36 47</sup> 9 reported a moderate effect size<sup>21 24 28 31 34 38 40 41 46</sup> and 3 reported a large effect size.<sup>20 35 44</sup> GRADE assessment of quality indicated the overall evidence as being very low (9 meta-analyses<sup>21 23 24 26 28 34 40 44 46</sup>), low (8 meta-analyses<sup>20 31 35-38 41 47</sup>), and high (1 meta-analysis<sup>34</sup>). A meta-analysis that included kidney transplant recipients found no statistically significant difference in the SMD of the exercise group (0.38; 95% CI, -0.06 to 0.82;  $P=0.09$ ).<sup>36</sup> See Table 2.

The effect of exercise on 6-minute walk test was investigated in 14 meta-analyses (reported in 13 articles) with a mild heterogeneity (average  $I^2=44.9\%$ ),<sup>21 24-26 28 31 33-35 37 38 40 48</sup> and 13 reported positive statistically significant outcomes.<sup>21 24-26 28 31 33-35 38 40 48</sup> Of the 14 meta-analyses, 2 reported a small effect size,<sup>21 24</sup> 5 reported a moderate effect size,<sup>33 34 38 40 48</sup> and 3 reported a large effect size.<sup>28 31 35</sup> GRADE assessment of quality indicated the overall evidence as being very low

1  
2  
3  
4 (8 meta-analyses<sup>21 26 28 31 35 37 40</sup>), low (4 meta-analyses<sup>24 34 38 48</sup>), and moderate (2 meta-analyses<sup>25</sup>  
5<sup>33</sup>). In addition, the meta-analysis by Heiwe et al (2014) showed that regular exercise had  
6 significant beneficial effects on aerobic capacity.<sup>29 30</sup> See Table 2.

### 8 **Muscle strength**

10  
11 Ten meta-analyses (reported in 9 articles) investigated the effects of exercise on muscle strength in  
12 CKD patients with a low heterogeneity (average  $I^2 = 19.1\%$ ).<sup>22 28-30 32-35 48</sup> The meta-analyses  
13 included a mean of 7 studies (ranging from 3 to 12) and a mean of 252 participants (ranging from  
14 115 to 385). See Table 3.

17  
18 Muscle strength was measured using handgrip strength, lower limb muscle strength, et al. For  
19 patients in 8 of 10 meta-analyses, exercise resulted in statistically significant improvements in  
20 muscle strength.<sup>28-30 32-34 48</sup> Of the 10 meta-analyses, 3 reported a small effect size,<sup>33 35 48</sup> 5  
21 reported a moderate effect size,<sup>28-30 32 33</sup> and 2 reported a large effect size.<sup>22 34</sup> GRADE assessment  
22 of quality indicated the overall evidence as being very low (6 meta-analyses<sup>28-30 32 34 35</sup>) and low (4  
23 meta-analyses<sup>22 33 48</sup>). See Table 3.

### 26 **Muscle endurance**

28  
29 Nine meta-analyses (reported in 8 articles) investigated the effects of exercise on muscle  
30 endurance with a mild heterogeneity (average  $I^2 = 29.4\%$ ).<sup>21 29 30 33 35 37 40 48</sup> A mean of 5 studies  
31 (ranging from 3 to 7) and a mean of 238 participants (ranging from 106 to 461) were included in  
32 meta-analyses (Table 4).

35  
36 Muscle endurance was measured using a sit-to-stand test, timed up and go test, and walking  
37 capacity exercise. Pooled effect estimates from all 9 meta-analyses suggested a beneficial effect of  
38 exercise on muscle endurance in CKD patients. Power to detect a statistically significant effect  
39 was reported by 7 of the 9 meta-analyses.<sup>21 29 33 35 40 48</sup> Two meta-analyses reported a moderate  
40 effect size and 5 reported a small effect size. GRADE assessment of quality indicated the overall  
41 evidence as being very low (7 meta-analyses<sup>21 29 33 35 37 40 48</sup>), low (1 meta-analyses<sup>33</sup>) and moderate  
42 (1 meta-analyses<sup>30</sup>). See Table 4.

### 46 **Body composition**

48  
49 Four meta-analyses consisting of a mean of 9 studies (ranging from 4 to 13) and a mean of 335  
50 participants (ranging from 166 to 466) included body mass index as an outcome.<sup>23 44 46 49</sup> There  
51 was a low heterogeneity (average  $I^2 = 12.0\%$ ) among the study outcomes (Table 5).

53  
54 Of the 4 meta-analyses, 3 showed a positive statistically significant impact on body mass index  
55 using exercise interventions in CKD patients.<sup>44 46 49</sup> Small effect size was reported in all  
56 meta-analyses. GRADE assessment of quality indicated the overall evidence as being very low (1  
57 meta-analyses), low (2 meta-analyses<sup>44 46</sup>) and moderate (1 meta-analyses<sup>49</sup>). See Table 5.

### Dialysis-related symptoms

Nine meta-analyses (reported in 7 articles) investigated the effect of exercise on dialysis-related symptoms in CKD patients.<sup>26 27 31 38 40 42 50</sup> Each meta-analysis included a mean of 7 studies (ranging from 3 to 12 studies) and a mean of 239 participants (ranging from 139 to 370). See Table 6.

Dialysis adequacy was measured using the value of Kt/V. Six meta-analyses (reported in 5 articles) investigated the effects of exercise on Kt/V in CKD patients with a mild heterogeneity (average  $I^2 = 25.7\%$ ).<sup>26 27 31 38 40</sup> Comprehensive effect estimates from all the 6 meta-analyses with Kt/V outcomes showed that exercise had a beneficial effect. Of the 6 meta-analyses, 3 reported a small effect size<sup>31 38 40</sup> and 1 reported a large effect size.<sup>27</sup> According to GRADE criteria, all meta-analyses were rated as very low quality of evidence (Table 6).

Fatigue was measured using the Rhoten Fatigue Scale, Visual Analogue Scale, and Hemodialysis Patients Fatigue Scale. The effect of exercise on fatigue was investigated in 2 meta-analyses with a low heterogeneity (average  $I^2 = 23.5\%$ ).<sup>42 50</sup> The 2 meta-analyses revealed a statistically significant effect of exercise on fatigue. Although the meta-analyses reported large effect size, the quality of evidence was low<sup>42</sup> or very low<sup>50</sup> according to GRADE criteria (Table 6).

Just one meta-analysis investigated the effects of exercise on restless legs syndrome in CKD patients.<sup>42</sup> Result showed that pooled effect estimated for restless legs syndrome with statistically significant but considerable average heterogeneity ( $I^2 = 87.0\%$ ). According to GRADE criteria, the overall of evidence for this outcome was rated as very low (Table 6).

### Health-related quality of life

Twenty-nine meta-analyses (reported in 13 articles) investigated the effect of exercise on HRQOL in CKD patients.<sup>22 24 28 31 32 34 36-40 48 50</sup> Among them, nine the meta-analyses each assessed physical and mental subscale of the Short-Form Health Survey-36.<sup>24 28 31 34 38-40 48 50</sup> A mean of 6 studies (ranging from 3 to 10) and a mean of 311 participants (ranging from 167 to 562) were included in each meta-analysis. The included meta-analyses had moderate heterogeneity (average  $I^2 = 51.0\%$ ). See Table 7.

Of the 29 meta-analyses, a comprehensive effect estimate of the 28 meta-analyses shows that exercise is beneficial to the HRQOL of CKD patients, but only 12 of 29 meta-analyses reported a statistically significant outcome.<sup>24 31 34 36 38-40 50</sup> There were 13 of 29 meta-analyses reporting a small effect size,<sup>24 28 31 34 38 40 48 50</sup> 4 were moderate,<sup>28 34 36 38</sup> and 6 were large.<sup>22 32 39</sup> According to GRADE criteria, the overall of evidence for HRQOL was rated as very low (20 meta-analyses<sup>28 32 34 36-40 50</sup>) or low (9 meta-analyses<sup>22 24 31 38 48 50</sup>). See Table 7.

### Adverse events

1  
2  
3 Six meta-analyses reported exercise-related adverse events.<sup>22 24 35 38 40 41</sup> Of the adverse effects, the  
4 most commonly reported were hypotension and cramping. Overall, the incidence of adverse  
5 events was approximately 0.3%.  
6  
7

## 8 **DISCUSSION**

9

10 Several meta-analyses have been published in the area of exercise interventions in CKD patients.<sup>51</sup>  
11 The findings of these meta-analyses should be assessed to determine if evidence is consistent  
12 among the studies. This umbrella review included 31 eligible articles involving 120 separate  
13 meta-analyses investigating the effect of exercise on the health outcomes in CKD patients. There  
14 was low- or very low-quality evidence for moderate beneficial effects of exercise on  
15 cardiorespiratory fitness, muscle strength, and body composition. In addition, there was very  
16 low-quality evidence for small beneficial effects of exercise on muscle endurance, cardiovascular  
17 risk factors, dialysis-related symptoms, and HRQOL. There were few adverse events related to  
18 exercise, indicating that exercise is safe for CKD patients.  
19  
20  
21  
22  
23  
24

25 Cardiovascular disease is a frequent complication of CKD and is the leading cause of death in  
26 CKD patients.<sup>52</sup> Hypertension is an important modifiable risk factor for cardiovascular diseases  
27 and progressive renal dysfunction in CKD patients.<sup>53</sup> The present overview showed that exercise  
28 has a small to moderate effect on blood pressure (SMD: -0.75 to 0.04 for systolic blood pressure,  
29 and SMD: -0.47 to 0.04 for diastolic blood pressure), it is an appealing strategy for blood pressure  
30 control in CKD patients. However, the dose effects of exercise in the context of the cardiovascular  
31 health of CKD patients should be considered. A recent cohort study found that 7.5-15 metabolic  
32 equivalent-hours per week (MET-h/week) was associated with the lowest risk of cardiovascular  
33 events.<sup>54</sup> Regrettable, the benefit of exercise on cardiovascular risk factors cannot be determined  
34 because there are an insufficient number of conclusive studies that assess exercise effects on  
35 overall cardiovascular health. A recent randomized controlled trial published by Graham-Brown  
36 indicated that intradialytic exercise can reduce left ventricular mass and is safe, deliverable, and  
37 well-tolerated.<sup>55</sup> Although the GRADE evidence generated was low, exercise should be  
38 recommended for CKD patients, particularly those comorbid with cardiovascular disease.  
39  
40  
41  
42  
43  
44  
45  
46

47 Physical fitness is necessary for participation in activities of daily living. Exercise provided the  
48 best results in improving cardiorespiratory fitness and muscle strength in CKD patients, with more  
49 than a half of the meta-analyses reporting moderate or large effect sizes, regardless of the quality  
50 of evidence. Cardiorespiratory fitness is considered an important independent predictor of  
51 mortality and muscle strength is an important indicator of physical performance in CKD  
52 patients.<sup>56</sup> It is well known that aerobic exercise is the “gold standard” for cardiorespiratory  
53 rehabilitation<sup>57</sup> and resistance training for muscle strength improvement.<sup>58</sup> However, a  
54 combination of aerobic and resistance exercises may have a more profound effect in CKD patients  
55 based on the current review. Meta-analyses conducted by Andrade et al. showed that combined  
56  
57  
58  
59  
60

1  
2  
3 training has an exert benefits in cardiorespiratory fitness in CKD patients.<sup>20</sup>  
4  
5

6 Both sarcopenia and obesity have been shown to increase mortality risk and increase progression  
7 to end-stage renal disease in CKD patients.<sup>59</sup> Unlike patients receiving dialysis, treatment  
8 requirements for predialysis CKD patient are based upon the principle of maintaining a “healthy  
9 weight” and the prevention or attenuation of obesity.<sup>10</sup> In this overview, the effectiveness of  
10 exercise for body mass index was supported by 4 analyses with small effect sizes and a moderate  
11 quality of evidence. Based on the results, exercise may contribute to lower body mass index in  
12 CKD patients. However, additional studies are needed to confirm the benefits of exercise  
13 programs for reducing sarcopenia and weight.  
14  
15  
16  
17

18 CKD population experience multiple symptoms that affect patient’s prognosis and HRQOL.<sup>60</sup>  
19 Patients who received dialysis treatment commonly reported restless legs syndrome, fatigue, and  
20 dialysis inadequate due to both the deterioration of kidney function and dialysis-related side  
21 effects.<sup>61 62</sup> These symptoms affect sleep, daily activities, and impose a considerable amount of  
22 psychological distress and economic burden.<sup>63</sup> An increasing number of researchers have  
23 investigated the role of exercise as an important non-pharmacological strategy for preventing  
24 and/or treating symptoms.<sup>64 65</sup> The results of a small number of meta-analyses suggested that the  
25 beneficial effect of exercise on dialysis adequacy (SMD: 0.19 to 2.21), and improving restless legs  
26 syndrome (SMD: -1.79) and fatigue symptoms (SMD: -0.97 to -0.85). Nevertheless, the efficacy  
27 of exercise in CKD patients for preventing dialysis-related symptoms awaits new clinical  
28 evidence.  
29  
30  
31  
32  
33  
34  
35

36 With similar results obtained in another overview that included chronic disease,<sup>66</sup> results from this  
37 overview demonstrated small beneficial effects of exercise on HRQOL, irrespective of the  
38 evidence level in CKD patients. Improved HRQOL is important because most of the population  
39 reported ongoing poor health and well-being due to diet restriction, weakness, and dialysis  
40 treatment.<sup>67</sup> The consistent health benefits of exercise in this overview demonstrated that exercise  
41 could be a strategy to improve the poor long-term prognosis in CKD patients.  
42  
43  
44  
45

46 Several meta-analyses reported exercise-related adverse events. Based on the number of adverse  
47 events reported, we calculate that only 3 adverse events occurred per 1000 CKD patients. The low  
48 incidence of adverse events indicated that the benefits of exercise in CKD patients outweigh its  
49 potential risks. However, most meta-analyses only included intradialytic exercise for hemodialysis  
50 patients in their assessments. Exercises during hemodialysis are usually performed under the  
51 supervision of a healthcare worker to ensure safety.<sup>68</sup> Due to the potential lack of supervision in an  
52 in-home exercise regime, a stepwise exercise is recommended for CKD patients.  
53  
54  
55  
56

57 Taken together, there is good reason to recommend exercise for improving prognosis in CKD  
58 patients. Evidence from most randomized controlled trials increased confidence in the findings of  
59 this umbrella review. Because most of the meta-analyses assessed in this study did not detail the  
60

1  
2  
3 exercises instituted, it is difficult to make recommendations about the type of exercise that would  
4 be the most beneficial for CKD patients. Although the effect sizes of exercise on improving the  
5 health prognosis of CKD patients were generally moderate, these effects may bring some clinical  
6 benefit to patients experiencing impaired function or symptom distress. Despite numerous  
7 meta-analyses provided only low or very low-quality evidence, similar beneficial effects of  
8 exercise were reported by meta-analyses of randomized controlled trials with different grades of  
9 evidence. Remarkably, a recently published trial found that a 6-month program of intradialytic  
10 exercise is effective in reducing healthcare costs.<sup>69</sup> Overall, exercise should be integrated into the  
11 care of CKD.

12  
13  
14  
15  
16  
17  
18 There are several limitations to this overview: 1) the majority of meta-analyses included in this  
19 review involves hemodialysis patients. This limits the extrapolation of the results to other stages  
20 of CKD; 2) improvement of flexibility in CKD patients was not investigated. Flexibility is an  
21 important component of physical fitness that is believed to have an impact on muscular injury.<sup>70</sup>  
22 The evidence for the efficacy of exercise on flexibility improvement is insufficient for a  
23 systematic review or meta-analysis; 3) language bias may exist in this review because the search  
24 strategy was limited to English. It is unknown if meta-analyses published in other languages  
25 would influence the outcomes of our findings; 4) the results may be had been influenced by  
26 overlap in the original studies; 5) the accuracy of the MD data cannot be guaranteed; and 6)  
27 sub-group analyses of different types of exercise were not performed as described in the published  
28 protocol because of most the included meta-analyses did not detail the exercises.

## 34 35 **CONCLUSION**

36  
37  
38  
39  
40  
41  
42  
43  
44  
45  
46  
47  
48  
49  
50  
51  
52  
53  
54  
55  
56  
57  
58  
59  
60  
Exercise appears to be effective in improving muscle strength and endurance, body composition,  
and HRQOL in CKD patients. At the same time, exercise appears to decrease blood pressure and  
dialysis-related symptoms in CKD patients. Accordingly, exercise should be integrated into renal  
care for a patient with any stage of CKD.

## 44 45 **Contributors**

46  
47  
48  
49  
50  
51  
52  
53  
54  
55  
56  
57  
58  
59  
60  
FZ, LYH, HCZ conceptualized and designed the review. YB and XZ searched databases, extracted the  
data, and statistical analysis. WQZ and WQW revised the manuscript. HCZ provided technical  
support. All authors had read and approved the final manuscript and agreed on its submission.

51  
52  
53  
54  
55  
56  
57  
58  
59  
60  
**Funding** This study was supported by Longhua Hospital Shanghai University of Traditional  
Chinese Medicine (Grant number: Y21026).

55  
56  
57  
58  
59  
60  
**Competing interests** None declared.

58  
59  
60  
**Data availability statement** Data are available in a public, open access repository. All data in the  
overview were published through journals.

1  
2  
3 **Patient consent for publication** Not required.  
4

5 **Provenance and peer review** Not commissioned; externally peer reviewed.  
6  
7  
8  
9

## 10 REFERENCES

- 11 1. Zoccali C, Vanholder R, Massy ZA, et al. The systemic nature of CKD. *Nat Rev Nephrol* 2017;13(6):344-58. doi: 10.1038/nrneph.2017.52 [published Online First: 2017/04/25]
- 12 2. Global, regional, and national burden of chronic kidney disease, 1990-2017: a systematic analysis  
13 for the Global Burden of Disease Study 2017. *Lancet* 2020;395(10225):709-33. doi:  
14 10.1016/s0140-6736(20)30045-3 [published Online First: 2020/02/18]
- 15 3. Yang C, Gao B, Zhao X, et al. Executive summary for China Kidney Disease Network (CK-NET)  
16 2016 Annual Data Report. *Kidney Int* 2020;98(6):1419-23. doi: 10.1016/j.kint.2020.09.003  
17 [published Online First: 2020/12/06]
- 18 4. Cheng HT, Xu X, Lim PS, et al. Worldwide Epidemiology of Diabetes-Related End-Stage Renal  
19 Disease, 2000-2015. *Diabetes Care* 2020 doi: 10.2337/dc20-1913 [published Online First:  
20 2020/11/19]
- 21 5. Roshanravan B, Robinson-Cohen C, Patel KV, et al. Association between physical performance and  
22 all-cause mortality in CKD. *J Am Soc Nephrol* 2013;24(5):822-30. doi:  
23 10.1681/asn.2012070702 [published Online First: 2013/04/20]
- 24 6. Wang XH, Mitch WE. Mechanisms of muscle wasting in chronic kidney disease. *Nat Rev Nephrol*  
25 2014;10(9):504-16. doi: 10.1038/nrneph.2014.112 [published Online First: 2014/07/02]
- 26 7. Hoshino J. Renal Rehabilitation: Exercise Intervention and Nutritional Support in Dialysis Patients.  
27 *Nutrients* 2021;13(5):1444.
- 28 8. Wilund KR, Viana JL, Perez LM. A Critical Review of Exercise Training in Hemodialysis Patients:  
29 Personalized Activity Prescriptions Are Needed. *Exerc Sport Sci Rev* 2020;48(1):28-39. doi:  
30 10.1249/jes.000000000000209 [published Online First: 2019/08/28]
- 31 9. March DS, Graham-Brown MP, Young HM, et al. 'There is nothing more deceptive than an obvious  
32 fact': more evidence for the prescription of exercise during haemodialysis (intradialytic  
33 exercise) is still required. *Br J Sports Med* 2017;51(18):1379. doi:  
34 10.1136/bjsports-2017-097542 [published Online First: 2017/04/01]
- 35 10. The Renal Association. Clinical Practice Guideline: Exercise and Lifestyle in Chronic Kidney  
36 Disease 2021 [Available from:  
37 [https://renal.org/sites/renal.org/files/Exercise%20and%20Lifestyle%20in%20CKD%20clinical](https://renal.org/sites/renal.org/files/Exercise%20and%20Lifestyle%20in%20CKD%20clinical%20practice%20guideline33_v4_FINAL_0.pdf)  
38 [l%20practice%20guideline33\\_v4\\_FINAL\\_0.pdf](https://renal.org/sites/renal.org/files/Exercise%20and%20Lifestyle%20in%20CKD%20clinical%20practice%20guideline33_v4_FINAL_0.pdf).  
39
- 40 11. Yamagata K, Hoshino J, Sugiyama H, et al. Clinical practice guideline for renal rehabilitation:  
41 Systematic reviews and recommendations of exercise therapies in patients with kidney  
42 diseases. *Renal Replacement Therapy* 2019;5 doi: 10.1186/s41100-019-0209-8  
43
- 44 12. Deschamps T. Let's programme exercise during haemodialysis (intradialytic exercise) into the care  
45 plan for patients, regardless of age. *Br J Sports Med* 2016;50(22):1357-58. doi:  
46 10.1136/bjsports-2016-096356 [published Online First: 2016/11/03]
- 47 13. Shamseer L, Moher D, Clarke M, et al. Preferred reporting items for systematic review and  
48 meta-analysis protocols (PRISMA-P) 2015: elaboration and explanation. *BMJ*  
49  
50  
51  
52  
53  
54  
55  
56  
57  
58  
59  
60



- 2015;350:g7647. doi: 10.1136/bmj.g7647 [published Online First: 2015/01/04]
14. Zhang F, Wang H, Huang L, et al. Therapeutic effects of exercise interventions for patients with chronic kidney disease: protocol for an overview of systematic reviews and meta-analyses of clinical trials. *BMJ Open* 2021;11(2):e043011. doi: 10.1136/bmjopen-2020-043011 [published Online First: 2021/02/13]
15. Shea BJ, Reeves BC, Wells G, et al. AMSTAR 2: a critical appraisal tool for systematic reviews that include randomised or non-randomised studies of healthcare interventions, or both. *Bmj* 2017;358:j4008. doi: 10.1136/bmj.j4008 [published Online First: 2017/09/25]
16. Grgic J, Grgic I, Pickering C, et al. Wake up and smell the coffee: caffeine supplementation and exercise performance-an umbrella review of 21 published meta-analyses. *Br J Sports Med* 2020;54(11):681-88. doi: 10.1136/bjsports-2018-100278 [published Online First: 2019/03/31]
17. Cohen J. Quantitative methods in psychology: A power primer. *Psychological Bulletin* 1992;112:115-59.
18. Higgins JP, Thompson SG, Deeks JJ, et al. Measuring inconsistency in meta-analyses. *BMJ* 2003;327(7414):557-60. doi: 10.1136/bmj.327.7414.557 [published Online First: 2003/09/06]
19. Atkins D, Best D, Briss PA, et al. Grading quality of evidence and strength of recommendations. *Bmj* 2004;328(7454):1490. doi: 10.1136/bmj.328.7454.1490 [published Online First: 2004/06/19]
20. Andrade FP, Rezende PS, Ferreira TS, et al. Effects of intradialytic exercise on cardiopulmonary capacity in chronic kidney disease: systematic review and meta-analysis of randomized clinical trials. *Sci Rep* 2019;9(1):18470. doi: 10.1038/s41598-019-54953-x [published Online First: 2019/12/06]
21. Bogataj S, Pajek M, Pajek J, et al. Exercise-Based Interventions in Hemodialysis Patients: A Systematic Review with a Meta-Analysis of Randomized Controlled Trials. *J Clin Med* 2019;9(1) doi: 10.3390/jcm9010043 [published Online First: 2019/12/28]
22. Cheema BS, Chan D, Fahey P, et al. Effect of progressive resistance training on measures of skeletal muscle hypertrophy, muscular strength and health-related quality of life in patients with chronic kidney disease: a systematic review and meta-analysis. *Sports Med* 2014;44(8):1125-38. doi: 10.1007/s40279-014-0176-8 [published Online First: 2014/04/04]
23. Chen G, Gao L, Li X. Effects of exercise training on cardiovascular risk factors in kidney transplant recipients: a systematic review and meta-analysis. *Ren Fail* 2019;41(1):408-18. doi: 10.1080/0886022X.2019.1611602 [published Online First: 2019/05/21]
24. Chung YC, Yeh ML, Liu YM. Effects of intradialytic exercise on the physical function, depression and quality of life for haemodialysis patients: a systematic review and meta-analysis of randomised controlled trials. *J Clin Nurs* 2017;26(13-14):1801-13. doi: 10.1111/jocn.13514 [published Online First: 2016/08/18]
25. Clarkson MJ, Bennett PN, Fraser SF, et al. Exercise interventions for improving objective physical function in patients with end-stage kidney disease on dialysis: a systematic review and meta-analysis. *Am J Physiol Renal Physiol* 2019;316(5):F856-f72. doi: 10.1152/ajprenal.00317.2018 [published Online First: 2019/02/14]
26. Ferrari F, Helal L, Dipp T, et al. Intradialytic training in patients with end-stage renal disease: a systematic review and meta-analysis of randomized clinical trials assessing the effects of five different training interventions. *J Nephrol* 2020;33(2):251-66. doi: 10.1007/s40620-019-00687-y [published Online First: 2019/12/23]

- 1  
2  
3  
4  
5  
6  
7  
8  
9  
10  
11  
12  
13  
14  
15  
16  
17  
18  
19  
20  
21  
22  
23  
24  
25  
26  
27  
28  
29  
30  
31  
32  
33  
34  
35  
36  
37  
38  
39  
40  
41  
42  
43  
44  
45  
46  
47  
48  
49  
50  
51  
52  
53  
54  
55  
56  
57  
58  
59  
60
27. Ferreira GD, Bohlke M, Correa CM, et al. Does Intradialytic Exercise Improve Removal of Solutes by Hemodialysis? A Systematic Review and Meta-analysis. *Arch Phys Med Rehabil* 2019;100(12):2371-80. doi: 10.1016/j.apmr.2019.02.009 [published Online First: 2019/03/30]
28. Gomes Neto M, de Lacerda FFR, Lopes AA, et al. Intradialytic exercise training modalities on physical functioning and health-related quality of life in patients undergoing maintenance hemodialysis: systematic review and meta-analysis. *Clin Rehabil* 2018;32(9):1189-202. doi: 10.1177/0269215518760380 [published Online First: 2018/02/27]
29. Heiwe S, Jacobson SH. Exercise training for adults with chronic kidney disease. *Cochrane Database Syst Rev* 2011(10):Cd003236. doi: 10.1002/14651858.CD003236.pub2 [published Online First: 2011/10/07]
30. Heiwe S, Jacobson SH. Exercise training in adults with CKD: a systematic review and meta-analysis. *Am J Kidney Dis* 2014;64(3):383-93. doi: 10.1053/j.ajkd.2014.03.020 [published Online First: 2014/06/11]
31. Huang M, Lv A, Wang J, et al. Exercise Training and Outcomes in Hemodialysis Patients: Systematic Review and Meta-Analysis. *Am J Nephrol* 2019;50(4):240-54. doi: 10.1159/000502447 [published Online First: 2019/08/28]
32. Ju H, Chen H, Mi C, et al. The Impact of Home-Based Exercise Program on Physical Function of Chronic Kidney Disease Patients: A Meta-Analysis of Randomized Controlled Trials. *Physikalische Medizin, Rehabilitationsmedizin, Kurortmedizin* 2020;30(02):108-14. doi: 10.1055/a-1079-3714
33. Lu Y, Wang Y, Lu Q. Effects of Exercise on Muscle Fitness in Dialysis Patients: A Systematic Review and Meta-Analysis. *Am J Nephrol* 2019;50(4):291-302. doi: 10.1159/000502635 [published Online First: 2019/09/04]
34. Matsuzawa R, Hoshi K, Yoneki K, et al. Exercise Training in Elderly People Undergoing Hemodialysis: A Systematic Review and Meta-analysis. *Kidney Int Rep* 2017;2(6):1096-110. doi: 10.1016/j.ekir.2017.06.008 [published Online First: 2017/12/23]
35. Nakamura K, Sasaki T, Yamamoto S, et al. Effects of exercise on kidney and physical function in patients with non-dialysis chronic kidney disease: a systematic review and meta-analysis. *Sci Rep* 2020;10(1):18195. doi: 10.1038/s41598-020-75405-x [published Online First: 2020/10/25]
36. Oguchi H, Tsujita M, Yazawa M, et al. The efficacy of exercise training in kidney transplant recipients: a meta-analysis and systematic review. *Clin Exp Nephrol* 2019;23(2):275-84. doi: 10.1007/s10157-018-1633-8 [published Online First: 2018/09/01]
37. Pei G, Tang Y, Tan L, et al. Aerobic exercise in adults with chronic kidney disease (CKD): a meta-analysis. *Int Urol Nephrol* 2019;51(10):1787-95. doi: 10.1007/s11255-019-02234-x [published Online First: 2019/07/25]
38. Pu J, Jiang Z, Wu W, et al. Efficacy and safety of intradialytic exercise in haemodialysis patients: a systematic review and meta-analysis. *BMJ Open* 2019;9(1):e020633. doi: 10.1136/bmjopen-2017-020633 [published Online First: 2019/01/24]
39. Salhab N, Karavetian M, Kooman J, et al. Effects of intradialytic aerobic exercise on hemodialysis patients: a systematic review and meta-analysis. *J Nephrol* 2019;32(4):549-66. doi: 10.1007/s40620-018-00565-z [published Online First: 2019/01/20]
40. Sheng K, Zhang P, Chen L, et al. Intradialytic exercise in hemodialysis patients: a systematic review and meta-analysis. *Am J Nephrol* 2014;40(5):478-90. doi: 10.1159/000368722

- [published Online First: 2014/12/17]
41. Smart N, Steele M. Exercise training in haemodialysis patients: a systematic review and meta-analysis. *Nephrology (Carlton)* 2011;16(7):626-32. doi: 10.1111/j.1440-1797.2011.01471.x [published Online First: 2011/05/12]
  42. Song YY, Hu RJ, Diao YS, et al. Effects of Exercise Training on Restless Legs Syndrome, Depression, Sleep Quality, and Fatigue Among Hemodialysis Patients: A Systematic Review and Meta-analysis. *J Pain Symptom Manage* 2018;55(4):1184-95. doi: 10.1016/j.jpainsymman.2017.12.472 [published Online First: 2017/12/17]
  43. Thompson S, Wiebe N, Padwal RS, et al. The effect of exercise on blood pressure in chronic kidney disease: A systematic review and meta-analysis of randomized controlled trials. *PLoS One* 2019;14(2):e0211032. doi: 10.1371/journal.pone.0211032 [published Online First: 2019/02/07]
  44. Vanden Wyngaert K, Van Craenenbroeck AH, Van Biesen W, et al. The effects of aerobic exercise on eGFR, blood pressure and VO<sub>2</sub>peak in patients with chronic kidney disease stages 3-4: A systematic review and meta-analysis. *PLoS One* 2018;13(9):e0203662. doi: 10.1371/journal.pone.0203662 [published Online First: 2018/09/12]
  45. Wu X, Yang L, Wang Y, et al. Effects of combined aerobic and resistance exercise on renal function in adult patients with chronic kidney disease: a systematic review and meta-analysis. *Clin Rehabil* 2020;34(7):851-65. doi: 10.1177/0269215520924459 [published Online First: 2020/06/10]
  46. Yamamoto R, Ito T, Nagasawa Y, et al. Efficacy of aerobic exercise on the cardiometabolic and renal outcomes in patients with chronic kidney disease: a systematic review of randomized controlled trials. *J Nephrol* 2021;34(1):155-64. doi: 10.1007/s40620-020-00865-3 [published Online First: 2021/01/03]
  47. Yang H, Wu X, Wang M. Exercise Affects Cardiopulmonary Function in Patients with Chronic Kidney Disease: A Meta-Analysis. *Biomed Res Int* 2017;2017:6405797. doi: 10.1155/2017/6405797 [published Online First: 2017/09/22]
  48. Zhang F, Zhou W, Sun Q, et al. Effects of intradialytic resistance exercises on physical performance, nutrient intake and quality of life among haemodialysis people: A systematic review and meta-analysis. *Nurs Open* 2021;8(2):529-38. doi: 10.1002/nop2.274 [published Online First: 2021/02/12]
  49. Zhang L, Wang Y, Xiong L, et al. Exercise therapy improves eGFR, and reduces blood pressure and BMI in non-dialysis CKD patients: evidence from a meta-analysis. *BMC Nephrol* 2019;20(1):398. doi: 10.1186/s12882-019-1586-5 [published Online First: 2019/10/31]
  50. Zhao QG, Zhang HR, Wen X, et al. Exercise interventions on patients with end-stage renal disease: a systematic review. *Clin Rehabil* 2019;33(2):147-56. doi: 10.1177/0269215518817083 [published Online First: 2019/02/23]
  51. Clyne N, Anding-Rost K. Exercise training in chronic kidney disease-effects, expectations and adherence. *Clin Kidney J* 2021;14(Suppl 2):ii3-ii14. doi: 10.1093/ckj/sfab012 [published Online First: 2021/05/14]
  52. Webster AC, Nagler EV, Morton RL, et al. Chronic Kidney Disease. *Lancet* 2017;389(10075):1238-52. doi: 10.1016/s0140-6736(16)32064-5 [published Online First: 2016/11/27]
  53. Cheung AK, Chang TI, Cushman WC, et al. Blood pressure in chronic kidney disease: conclusions

- 1  
2  
3 from a Kidney Disease: Improving Global Outcomes (KDIGO) Controversies Conference.  
4 *Kidney Int* 2019;95(5):1027-36. doi: 10.1016/j.kint.2018.12.025 [published Online First:  
5 2019/04/24]  
6  
7 54. Kuo CP, Tsai MT, Lee KH, et al. Dose-response effects of physical activity on all-cause mortality  
8 and major cardiorenal outcomes in chronic kidney disease. *Eur J Prev Cardiol* 2021 doi:  
9 10.1093/eurjpc/zwaa162 [published Online First: 2021/03/12]  
10  
11 55. Graham-Brown MPM, March DS, Young R, et al. A randomized controlled trial to investigate the  
12 effects of intra-dialytic cycling on left ventricular mass. *Kidney International* 2021 doi:  
13 <https://doi.org/10.1016/j.kint.2021.02.027>  
14  
15 56. Zelle DM, Klaassen G, van Adrichem E, et al. Physical inactivity: a risk factor and target for  
16 intervention in renal care. *Nat Rev Nephrol* 2017;13(3):152-68. doi: 10.1038/nrneph.2016.187  
17 [published Online First: 2017/02/01]  
18  
19 57. Mezzani A, Hamm LF, Jones AM, et al. Aerobic exercise intensity assessment and prescription in  
20 cardiac rehabilitation: a joint position statement of the European Association for  
21 Cardiovascular Prevention and Rehabilitation, the American Association of Cardiovascular  
22 and Pulmonary Rehabilitation and the Canadian Association of Cardiac Rehabilitation. *Eur J*  
23 *Prev Cardiol* 2013;20(3):442-67. doi: 10.1177/2047487312460484 [published Online First:  
24 2012/10/30]  
25  
26 58. Chan D, Cheema BS. Progressive Resistance Training in End-Stage Renal Disease: Systematic  
27 Review. *Am J Nephrol* 2016;44(1):32-45. doi: 10.1159/000446847 [published Online First:  
28 2016/06/30]  
29  
30 59. Androga L, Sharma D, Amodu A, et al. Sarcopenia, obesity, and mortality in US adults with and  
31 without chronic kidney disease. *Kidney Int Rep* 2017;2(2):201-11. doi:  
32 10.1016/j.ekir.2016.10.008 [published Online First: 2017/04/26]  
33  
34 60. Weisbord SD, Fried LF, Arnold RM, et al. Prevalence, severity, and importance of physical and  
35 emotional symptoms in chronic hemodialysis patients. *J Am Soc Nephrol* 2005;16(8):2487-94.  
36 doi: 10.1681/asn.2005020157 [published Online First: 2005/06/25]  
37  
38 61. Flythe JE, Hilliard T, Castillo G, et al. Symptom Prioritization among Adults Receiving In-Center  
39 Hemodialysis: A Mixed Methods Study. *Clin J Am Soc Nephrol* 2018;13(5):735-45. doi:  
40 10.2215/cjn.10850917 [published Online First: 2018/03/22]  
41  
42 62. Gregg LP, Bossola M, Ostrosky-Frid M, et al. Fatigue in CKD: Epidemiology, Pathophysiology,  
43 and Treatment. *Clin J Am Soc Nephrol* 2021 doi: 10.2215/cjn.19891220 [published Online  
44 First: 2021/04/17]  
45  
46 63. Flythe JE, Dorough A, Narendra JH, et al. Perspectives on symptom experiences and symptom  
47 reporting among individuals on hemodialysis. *Nephrol Dial Transplant* 2018;33(10):1842-52.  
48 doi: 10.1093/ndt/gfy069 [published Online First: 2018/04/20]  
49  
50 64. Metzger M, Abdel-Rahman EM, Boykin H, et al. A Narrative Review of Management Strategies  
51 for Common Symptoms in Advanced CKD. *Kidney Int Rep* 2021;6(4):894-904. doi:  
52 10.1016/j.ekir.2021.01.038 [published Online First: 2021/04/30]  
53  
54 65. Johansen KL. The Promise and Challenge of Aerobic Exercise in People Undergoing Long-Term  
55 Hemodialysis. *Clin J Am Soc Nephrol* 2021;16(4):505-07. doi: 10.2215/cjn.01960221  
56 [published Online First: 2021/03/27]  
57  
58 66. Fuller JT, Hartland MC, Maloney LT, et al. Therapeutic effects of aerobic and resistance exercises  
59 for cancer survivors: a systematic review of meta-analyses of clinical trials. *Br J Sports Med*  
60

- 1  
2  
3 2018;52(20):1311. doi: 10.1136/bjsports-2017-098285 [published Online First: 2018/03/20]  
4  
5 67. Amir N, Tong A, McCarthy H, et al. Trajectories of quality of life in chronic kidney disease: a  
6 novel perspective of disease progression. *Nephrol Dial Transplant* 2021 doi:  
7 10.1093/ndt/gfab006 [published Online First: 2021/01/29]  
8  
9 68. Parker K. Intradialytic Exercise is Medicine for Hemodialysis Patients. *Curr Sports Med Rep*  
10 2016;15(4):269-75. doi: 10.1249/jsr.0000000000000280 [published Online First: 2016/07/12]  
11  
12 69. March DS, Hurt AW, Grantham CE, et al. A Cost-Effective Analysis of the CYCLE-HD  
13 Randomized Controlled Trial. *Kidney International Reports* doi: 10.1016/j.ekir.2021.02.036  
14  
15 70. Fuhrmann I, Krause R. Principles of exercising in patients with chronic kidney disease, on dialysis  
16 and for kidney transplant recipients. *Clin Nephrol* 2004;61 Suppl 1:S14-25. [published Online  
17 First: 2004/07/06  
18  
19  
20  
21  
22  
23  
24  
25  
26  
27  
28  
29  
30  
31  
32  
33  
34  
35  
36  
37  
38  
39  
40  
41  
42  
43  
44  
45  
46  
47  
48  
49  
50  
51  
52  
53  
54  
55  
56  
57  
58  
59  
60

**Table 1 Summary of the effect of exercise on cardiovascular risk factor in CKD patients**

| Author (year)   | Design        | Stage of CKD | k (n)   | Exercise type | Mode          | SMD or MD (95% CI)     | Effect size | <i>P</i> | <i>I</i> <sup>2</sup> | GRADE |
|-----------------|---------------|--------------|---------|---------------|---------------|------------------------|-------------|----------|-----------------------|-------|
| <b>SBP</b>      |               |              |         |               |               |                        |             |          |                       |       |
| Pei (2019)      | RCT/quasi-RCT | Mixed        | 12(514) | AE            | -             | MD:-2.91 (-6.68, 0.87) | -           | 0.13     | 40.0%                 | ⊕⊕○○  |
| Wu (2020)       | RCT/quasi-RCT | Predialysis  | 3 (204) | AE+RT         | -             | SMD:-0.19(-0.46,0.08)  | Small       | 0.16     | 50.0%                 | ⊕○○○  |
| Chen (2019)     | RCT           | KTRs         | 5(198)  | Mixed         | -             | SMD:0.18(-0.10,0.46)   | Small       | 0.21     | 0.0%                  | ⊕○○○  |
| Pu (2019)       | RCT           | HD           | 7(287)  | Mixed         | Intradialytic | SMD:-0.28(-0.52,-0.05) | Small       | 0.02     | 0.0%                  | ⊕○○○  |
| Yamamoto (2021) | RCT           | Predialysis  | 10(392) | AE            | -             | SMD:-0.75(-1.24,-0.26) | Moderate    | 0.003    | 80.3%                 | ⊕○○○  |
| Thompson (2019) | RCT           | Predialysis  | 10(335) | Mixed         | -             | MD:-4.30(-9.00,0.40)   | -           | N.P.     | 50.4%                 | ⊕○○○  |
| Zhang (2019)    | RCT           | Predialysis  | 14(463) | Mixed         | -             | SMD:-0.41(-0.70,-0.11) | Small       | 0.007    | 55.0%                 | ⊕⊕⊕○  |
| Huang (2019)    | RCT           | HD           | 7(260)  | Mixed         | Mixed         | SMD:-0.17(-0.41,0.08)  | Small       | 0.18     | 8.0%                  | ⊕⊕○○  |
| Heiwe (2011)    | RCT/quasi-RCT | Mixed        | 9(347)  | Mixed         | -             | SMD:0.25(0.04,0.47)    | Small       | 0.02     | 0.0%                  | ⊕○○○  |
| Heiwe (2014)    | RCT           | HD           | 10(312) | Mixed         | -             | SMD:0.04(-0.34,0.41)   | Small       | 0.8      | 58.0%                 | ⊕○○○  |
| Sheng (2014)    | RCT           | HD           | 7(296)  | Mixed         | Intradialytic | SMD:-0.27(-0.50,-0.04) | Small       | 0.02     | 0.0%                  | ⊕○○○  |
| Ferrari (2019)  | RCT           | HD           | 10(332) | AE            | Intradialytic | MD:-10.07(16.35,-3.78) | -           | 0.002    | 44.0%                 | ⊕○○○  |
| Wyngaert (2018) | RCT           | Predialysis  | 8(269)  | AE            | -             | SMD:0.08(-0.58,0.74)   | Small       | 0.81     | 84%                   | ⊕○○○  |
| <b>DBP</b>      |               |              |         |               |               |                        |             |          |                       |       |
| Pei (2019)      | RCT/quasi-RCT | Mixed        | 12(514) | AE            | -             | MD:-1.11 (-3.41, 1.20) | -           | 0.35     | 0.0%                  | ⊕⊕○○  |
| Wu (2020)       | RCT/quasi-RCT | Predialysis  | 4 (194) | AE+RT         | -             | SMD:-0.47(-1.10,0.15)  | Small       | 0.14     | 70.0%                 | ⊕○○○  |
| Chen (2019)     | RCT           | KTRs         | 5(198)  | Mixed         | -             | SMD:0.04(-0.45,0.52)   | Small       | 0.89     | 59.0%                 | ⊕○○○  |
| Pu (2019)       | RCT           | HD           | 7(287)  | Mixed         | Intradialytic | SMD:-0.32(-0.55,-0.08) | Small       | 0.008    | 42.0%                 | ⊕○○○  |

|                 |               |             |         |       |               |                        |       |      |       |      |
|-----------------|---------------|-------------|---------|-------|---------------|------------------------|-------|------|-------|------|
| Thompson (2019) | RCT           | Predialysis | 8(303)  | Mixed | -             | MD:-1.18(-4.76,2.40)   | -     | N.P. | 60.5% | ⊕○○○ |
| Zhang (2019)    | RCT           | Predialysis | 12(399) | Mixed | -             | SMD:-0.31(-0.71,0.08)  | Small | 0.12 | 70.0% | ⊕⊕○○ |
| Huang (2019)    | RCT           | HD          | 7(260)  | Mixed | Mixed         | SMD:-0.23(-0.69,0.24)  | Small | 0.34 | 68.0% | ⊕○○○ |
| Heiwe (2011)    | RCT/quasi-RCT | Mixed       | 11(419) | Mixed | -             | SMD:0.16(-0.04,0.36)   | Small | 0.11 | 40.0% | ⊕○○○ |
| Heiwe (2014)    | RCT           | HD          | 10(212) | Mixed | Mixed         | SMD:0.17(-0.16,0.49)   | Small | 0.3  | 45.0% | ⊕⊕○○ |
| Sheng (2014)    | RCT           | HD          | 7(296)  | Mixed | Intradialytic | SMD:-0.24(-0.47,-0.01) | Small | 0.04 | 52.1% | ⊕○○○ |
| Ferrari (2019)  | RCT           | HD          | 10(334) | AE    | Intradialytic | MD:-2.96(-7.71,1.78)   | -     | 0.22 | 0.0%  | ⊕○○○ |
| Wyngaert (2018) | RCT           | Predialysis | 7(237)  | AE    | -             | SMD-0.09(-0.78,0.59)   | Small | 0.79 | 83%   | ⊕○○○ |

Abbreviation: RCT = randomized controlled trial; AE = aerobic exercise; RT = resistance training; DBP = diastolic blood pressure; SBP = systolic blood pressure; SMD = standardized mean difference; MD = mean difference; HD = hemodialysis; KTRs = kidney transplant recipients; GRADE = Grading of Recommendations Assessment, Development, and Evaluation; N.P. = no report.

**Table 2 Summary of the effect of exercise on cardiopulmonary fitness in CKD patients**

| Author (year)             | Design         | Stage of CKD | k (n)   | Exercise type | Mode          | SMD or MD (95% CI)   | Effect size | <i>P</i> | <i>I</i> <sup>2</sup> | GRADE |
|---------------------------|----------------|--------------|---------|---------------|---------------|----------------------|-------------|----------|-----------------------|-------|
| <b>VO<sub>2peak</sub></b> |                |              |         |               |               |                      |             |          |                       |       |
| Pei (2019)                | RCT/quasi-RCT  | Mixed        | 17(464) | AE            | -             | MD:2.08(1.10,3.05)   | -           | <0.001   | 25.0%                 | ⊕⊕○○  |
| Nakamura (2020)           | RCT/cross-over | Predialysis  | 10(401) | Mixed         | -             | SMD:0.88(0.53,1.23)  | Large       | <0.001   | 56.0%                 | ⊕⊕○○  |
| Chen (2019)               | RCT            | KTRs         | 6(202)  | Mixed         | -             | SMD:0.33(-0.02,0.69) | Small       | 0.06     | 27.0%                 | ⊕○○○  |
| Andrade (2019)            | RCT            | HD           | 5(201)  | AE+RT         | Intradialytic | SMD:1.01(0.71,1.30)  | Large       | <0.001   | 0.0%                  | ⊕⊕○○  |
| Chung (2016)              | RCT            | HD           | 6(238)  | Mixed         | Intradialytic | SMD:0.55(0.18,0.92)  | Moderate    | 0.003    | 52.9%                 | ⊕○○○  |
| Pu (2019)                 | RCT            | HD           | 10(400) | Mixed         | Intradialytic | SMD:0.57(0.23,0.90)  | Moderate    | <0.001   | 59.0%                 | ⊕⊕○○  |
| Yamamoto (2021)           | RCT            | Predialysis  | 10(365) | AE            | -             | SMD:0.54(0.29,0.78)  | Moderate    | <0.001   | 24.6%                 | ⊕○○○  |
| Yang (2017)               | RCT            | Mixed        | 5(179)  | Mixed         | -             | SMD:0.33(0.03,0.63)  | Small       | 0.003    | 47.0%                 | ⊕⊕○○  |
| Huang (2019)              | RCT            | HD           | 10(371) | Mixed         | Mixed         | SMD:0.73(0.52,0.95)  | Moderate    | <0.001   | 71.0%                 | ⊕⊕○○  |
| Matsuzawa (2017)          | RCT            | HD           | 18(582) | Mixed         | Mixed         | SMD:0.62(0.38,0.87)  | Moderate    | <0.001   | 49.0%                 | ⊕⊕⊕⊕  |
| Smart (2011)              | RCT            | HD           | 8(365)  | Mixed         | Mixed         | SMD:0.75(0.39,1.11)  | Moderate    | <0.001   | 60.0%                 | ⊕⊕○○  |
| Bogataj (2020)            | RCT            | HD           | 20(504) | Mixed         | Mixed         | SMD:0.58(0.32,0.85)  | Moderate    | <0.001   | 57.4%                 | ⊕○○○  |
| Sheng (2014)              | RCT            | HD           | 7(310)  | Mixed         | Intradialytic | SMD:0.53(0.30,0.76)  | Moderate    | <0.001   | 36.0%                 | ⊕○○○  |
| Neto (2018)               | RCT            | HD           | 10(394) | Mixed         | Intradialytic | SMD:0.60(0.15,1.04)  | Moderate    | 0.008    | 76.0%                 | ⊕○○○  |
| Ferrari (2019)            | RCT            | HD           | 5(201)  | AE+RT         | Intradialytic | MD:5.41(4.03,6.79)   | -           | <0.001   | 0.0%                  | ⊕○○○  |
| Ferrari (2019)            | RCT            | HD           | 7(248)  | AE            | Intradialytic | MD:2.07(0.42,3.72)   | -           | <0.001   | 0.0%                  | ⊕○○○  |
| Wyngaert (2018)           | RCT            | Predialysis  | 11(325) | AE            | -             | SMD:0.99(0.49,1.48)  | Large       | <0.001   | 74.0%                 | ⊕○○○  |
| Oguchi (2018)             | RCT            | KTRs         | 4(182)  | Mixed         | -             | SMD:0.38(-0.06,0.82) | Small       | 0.09     | 45.0%                 | ⊕⊕○○  |



1  
2  
3  
4  
5  
6  
7  
8  
9  
10  
11  
12  
13  
14  
15  
16  
17  
18  
19  
20  
21  
22  
23  
24  
25  
26  
27  
28  
29  
30  
31  
32  
33  
34  
35  
36  
37  
38  
39  
40  
41  
42  
43  
44  
45  
46

| 6MWT             |                |             |         |       |               |                        |          |        |       |      |
|------------------|----------------|-------------|---------|-------|---------------|------------------------|----------|--------|-------|------|
| Pei (2019)       | RCT/quasi-RCT  | Mixed       | 8 (496) | AE    | -             | MD:0.04 (-0.52, 0.59)  | -        | 0.90   | 86.0% | ⊕○○○ |
| Nakamura (2020)  | RCT/cross-over | Predialysis | 5(392)  | Mixed | -             | SMD:1.04(0.17,1.90)    | Large    | 0.02   | 92.0% | ⊕○○○ |
| Lu (2019)        | RCT            | Dialysis    | 11(300) | Mixed | Mixed         | SMD:0.52(0.31,0.72)    | Moderate | <0.001 | 39.0% | ⊕⊕⊕○ |
| Chung (2016)     | RCT            | HD          | 4(127)  | Mixed | Intradialytic | SMD:0.44(0.09,0.80)    | Small    | 0.015  | 0.0%  | ⊕⊕○○ |
| Zhang (2021)     | RCT            | HD          | 8(299)  | RT    | Intradialytic | SMD:0.52(0.28,0.75)    | Moderate | <0.001 | 18.7% | ⊕⊕○○ |
| Pu (2019)        | RCT            | HD          | 7(219)  | Mixed | Intradialytic | SMD:0.57(0.30,0.84)    | Moderate | <0.001 | 0.0%  | ⊕⊕○○ |
| Clarkson (2019)  | RCT            | Dialysis    | 18(744) | Mixed | -             | MD:33.64(23.74,43.54)  | -        | <0.001 | 0.0%  | ⊕⊕⊕○ |
| Huang (2019)     | RCT            | HD          | 7(205)  | Mixed | Mixed         | SMD:1.01(0.26,1.76)    | Large    | 0.008  | 83.0% | ⊕○○○ |
| Matsuzawa (2017) | RCT            | HD          | 10(326) | Mixed | Mixed         | SMD:0.58(0.24,0.93)    | Moderate | <0.001 | 53.0% | ⊕⊕○○ |
| Bogataj (2020)   | RCT            | HD          | 19      | Mixed | Mixed         | SMD:0.44(0.21,0.67)    | Small    | <0.001 | 49.6% | ⊕○○○ |
| Sheng (2014)     | RCT            | HD          | 4(146)  | Mixed | Intradialytic | SMD:0.58(0.23,0.93)    | Moderate | <0.001 | 89.7% | ⊕○○○ |
| Neto (2018)      | RCT            | HD          | 6(158)  | Mixed | Intradialytic | SMD:0.96(0.11,1.80)    | Large    | 0.03   | 82.0% | ⊕○○○ |
| Ferrari (2019)   | RCT            | HD          | 6(211)  | RT    | Intradialytic | MD:68.5(29.05,107.96)  | -        | <0.001 | 36.0% | ⊕○○○ |
| Ferrari (2019)   | RCT            | HD          | 6(188)  | AE    | Intradialytic | MD:64.98(43.86,86.11)  | -        | <0.001 | 0.0%  | ⊕○○○ |
| Aerobic capacity |                |             |         |       |               |                        |          |        |       |      |
| Heiwe (2011)     | RCT/quasi-RCT  | Mixed       | 24(847) | Mixed | -             | SMD:-0.56(-0.70,-0.42) | Moderate | <0.001 | 12.0% | ⊕○○○ |
| Heiwe (2014)     | RCT            | HD          | 21(374) | Mixed | Mixed         | SMD:-0.80(-1.02,-0.58) | Large    | <0.001 | 0.0%  | ⊕⊕○○ |

Abbreviation: RCT = randomized controlled trial; AE = aerobic exercise; RT = resistance training; VO<sub>2peak</sub> = peak oxygen uptake; 6MWT = 6 minutes walk test; SMD = standardized mean difference; MD = mean difference; HD = hemodialysis; KTRs = kidney transplant recipients; GRADE = Grading of Recommendations Assessment, Development, and Evaluation.

**Table 3 Summary of the effect of exercise on muscle strength in CKD patients**

| Author(year)     | Design         | Stage of CKD | k (n)   | Exercise type | Mode          | SMD or MD (95% CI)     | Effect size | <i>P</i> | <i>I</i> <sup>2</sup> | GRADE |
|------------------|----------------|--------------|---------|---------------|---------------|------------------------|-------------|----------|-----------------------|-------|
| Cheema (2014)    | RCT            | Predialysis  | 7(249)  | RT            | -             | SMD:1.15(0.80,1.49)    | Large       | 0.161    | 35.0%                 | ⊕⊕○○  |
| Nakamura (2020)  | RCT/cross-over | Predialysis  | 4(119)  | Mixed         | -             | SMD:0.35(-0.03,0.73)   | Small       | 0.07     | 7.0%                  | ⊕○○○  |
| Lu (2019)        | RCT            | Dialysis     | 5(234)  | Mixed         | Mixed         | SMD:0.59(0.20,0.98)    | Moderate    | 0.003    | 52.0%                 | ⊕⊕○○  |
| Lu (2019)        | RCT            | Dialysis     | 7(224)  | Mixed         | Mixed         | SMD:0.47(0.20,0.74)    | Small       | <0.001   | 0.0%                  | ⊕⊕○○  |
| Zhang (2021)     | RCT            | HD           | 6(300)  | RT            | Intradialytic | SMD:0.35(0.12,0.58)    | Small       | 0.003    | 41.6%                 | ⊕⊕○○  |
| Heiwe (2011)     | RCT/quasi-RCT  | Mixed        | 9(358)  | Mixed         | -             | SMD:-0.52(-0.73,-0.31) | Moderate    | <0.001   | 0.0%                  | ⊕○○○  |
| Heiwe (2014)     | RCT            | HD           | 12(385) | Mixed         | Mixed         | SMD:-0.56(-0.77,-0.35) | Moderate    | <0.001   | 0.0%                  | ⊕○○○  |
| Matsuzawa (2017) | RCT            | HD           | 9(281)  | Mixed         | Mixed         | SMD:0.94(0.67,1.21)    | Large       | <0.001   | 10.0%                 | ⊕○○○  |
| Neto (2018)      | RCT            | HD           | 9(250)  | Mixed         | Intradialytic | SMD:0.61(0.39,0.83)    | Moderate    | <0.001   | 58.9%                 | ⊕○○○  |
| Ju (2020)        | RCT            | Mixed        | 3(115)  | Mixed         | -             | SMD:0.52(0.14,0.89)    | Moderate    | 0.007    | 0.0%                  | ⊕○○○  |

Abbreviation: RCT = randomized controlled trial; RT = resistance training; SMD = standardized mean difference; MD = mean difference; HD = hemodialysis; GRADE = Grading of Recommendations Assessment, Development, and Evaluation.

1  
2  
3  
4  
5  
6  
7  
8  
9  
10  
11  
12  
13  
14  
15  
16  
17  
18  
19  
20  
21  
22  
23  
24  
25  
26  
27  
28  
29  
30  
31  
32  
33  
34  
35  
36  
37  
38  
39  
40  
41  
42  
43  
44  
45  
46

For peer review only

**Table 4 Summary of the effect of exercise on muscle endurance in CKD patients**

| Author (year)   | Design         | Stage of CKD | k (n)  | Exercise type | Mode          | Outcome          | SMD or MD (95% CI)     | Effect size | P      | I <sup>2</sup> | GRADE |
|-----------------|----------------|--------------|--------|---------------|---------------|------------------|------------------------|-------------|--------|----------------|-------|
| Lu (2019)       | RCT            | Dialysis     | 3(193) | Mixed         | Mixed         | STS 10           | MD:-4.69(-9.01,-0.38)  | -           | 0.028  | 72.2%          | ⊕○○○  |
| Bogataj (2020)  | RCT            | HD           | 5(461) | Mixed         | -             | STS 10           | SMD:-0.55(-1.00,-0.09) | Moderate    | 0.019  | 71.6%          | ⊕○○○  |
| Lu (2019)       | RCT            | Dialysis     | 6(240) | Mixed         | Mixed         | STS 30           | SMD:0.43(0.17,0.69)    | Small       | 0.001  | 2.0%           | ⊕⊕○○  |
| Zhang (2021)    | RCT            | HD           | 5(164) | RT            | Intradialytic | STS 30           | SMD:0.42(0.11,0.74)    | Small       | 0.008  | 0.0%           | ⊕○○○  |
| Sheng (2014)    | RCT            | HD           | 3(106) | Mixed         | Intradialytic | STS 60           | SMD:0.71(0.31,1.12)    | Moderate    | <0.001 | 0.0%           | ⊕○○○  |
| Pei (2019)      | RCT/quasi-RCT  | Mixed        | 5(445) | AE            | -             | STS 60           | MD:2.08(1.1,3.05)      | -           | 0.98   | 82.0%          | ⊕○○○  |
| Nakamura (2020) | RCT/cross-over | Predialysis  | 3(170) | Mixed         | -             | TUGT             | SMD:-0.42(-0.73,-0.11) | Small       | 0.007  | 0.0%           | ⊕○○○  |
| Heiwe (2011)    | RCT/quasi-RCT  | Mixed        | 7(191) | Mixed         | -             | Walking capacity | SMD:-0.48(-0.79,-0.17) | Small       | 0.003  | 2.0%           | ⊕○○○  |
| Heiwe (2014)    | RCT            | HD           | 7(174) | Mixed         | Mixed         | Walking capacity | SMD:-0.33(-0.67,0.01)  | Small       | 0.06   | 16.0%          | ⊕⊕⊕○  |

Abbreviation: RCT = randomized controlled trial; AE = aerobic exercise; RT = resistance training; STS 10 = sit to stand 10 test; STS 30 = sit to stand 30 test; STS 60 = sit to stand 60 test; TUGT = timed up and go test; SMD = standardized mean difference; MD = mean difference; HD = hemodialysis; GRADE = Grading of Recommendations Assessment, Development, and Evaluation.

Table 5 Summary of the effect of exercise on body composition in CKD patients

| Author (year)   | Design | Stage of CKD | k (n)   | Exercise type | Mode | SMD (95% CI)           | Effect size | P     | I <sup>2</sup> | GRADE |
|-----------------|--------|--------------|---------|---------------|------|------------------------|-------------|-------|----------------|-------|
| Chen (2019)     | RCT    | KTRs         | 4(166)  | Mixed         | -    | SMD:0.02(-0.28,0.33)   | Small       | 0.89  | 0.0%           | ⊕○○○  |
| Yamamoto (2021) | RCT    | Predialysis  | 10(414) | AE            | -    | SMD:-0.19(-0.38,-0.00) | Small       | 0.026 | 0.0%           | ⊕⊕○○  |
| Zhang (2019)    | RCT    | Predialysis  | 13(466) | Mixed         | -    | SMD:-0.21(-0.39,-0.03) | Small       | 0.02  | 0.0%           | ⊕⊕⊕○  |
| Wyngaert (2018) | RCT    | Predialysis  | 9(294)  | AE            | -    | SMD:-0.36(-0.60,-0.13) | Small       | 0.002 | 48.0%          | ⊕⊕○○  |

Abbreviation: RCT = randomized controlled trial; AE = aerobic exercise; SMD = standardized mean difference; KTRs = kidney transplant recipients;;GRADE = Grading of Recommendations Assessment, Development, and Evaluation.

1  
2  
3  
4  
5  
6  
7  
8  
9  
10  
11  
12  
13  
14  
15  
16  
17  
18  
19  
20  
21  
22  
23  
24  
25  
26  
27  
28  
29  
30  
31  
32  
33  
34  
35  
36  
37  
38  
39  
40  
41  
42  
43  
44  
45  
46

**Table 6 Summary of the effect of exercise on dialysis-related symptoms in CKD patients**

| Author (year)   | Design        | Stage of CKD | k (n)   | Exercise type | Mode          | Outcomes | SMD or MD (95% CI)     | Effect size | <i>P</i> | <i>I</i> <sup>2</sup> | GRADE |
|-----------------|---------------|--------------|---------|---------------|---------------|----------|------------------------|-------------|----------|-----------------------|-------|
| Ferreira (2019) | RCT/quasi-RCT | HD           | 10(346) | AE            | Intradialytic | Kt/V     | SMD:2.21(1.17,3.25)    | Large       | <0.001   | 92.0%                 | ⊕○○○  |
| Pu (2019)       | RCT           | HD           | 10(301) | Mixed         | Intradialytic | Kt/V     | SMD:0.29(0.06,0.52)    | Small       | 0.01     | 0.0%                  | ⊕○○○  |
| Huang (2019)    | RCT           | HD           | 8(257)  | Mixed         | Mixed         | Kt/V     | SMD:0.19(-0.06,0.43)   | Small       | 0.14     | 0.0%                  | ⊕○○○  |
| Sheng (2014)    | RCT           | HD           | 7(233)  | Mixed         | Intradialytic | Kt/V     | SMD:0.27(0.01,0.53)    | Small       | 0.04     | 0.0%                  | ⊕○○○  |
| Ferrari (2019)  | RCT           | HD           | 12(370) | AE            | Intradialytic | Kt/V     | MD:0.08(0.0,0.15)      | -           | 0.04     | 56.0%                 | ⊕○○○  |
| Ferrari (2019)  | RCT           | HD           | 6(220)  | RT            | Intradialytic | Kt/V     | MD:0.10(0.0,0.2)       | -           | 0.06     | 6.0%                  | ⊕○○○  |
| Song (2018)     | RCT           | HD           | 4(141)  | Mixed         | Mixed         | RLS      | SMD:-1.79(-2.21,-1.37) | Large       | <0.001   | 87.0%                 | ⊕○○○  |
| Song (2018)     | RCT           | HD           | 3(139)  | Mixed         | Mixed         | Fatigue  | SMD:-0.85(-1.20,-0.50) | Large       | <0.001   | 0.0%                  | ⊕○○○  |
| Zhao (2019)     | RCT           | Dialysis     | 3(141)  | Mixed         | -             | Fatigue  | SMD:-0.97(-1.32,-0.62) | Large       | <0.001   | 47.0%                 | ⊕⊕○○  |

Abbreviation: RCT = randomized controlled trial; AE = aerobic exercise; RT = resistance training; SMD = standardized mean difference; MD = mean difference; HD = hemodialysis; KTRs = kidney transplant recipients; RLS = Restless Legs Syndrome; GRADE = Grading of Recommendations Assessment, Development, and Evaluation.

Table 7 Summary of the effect of exercise on health-related quality of lifes in CKD patients

| Author (year)    | Design | Stage of CKD | k (n)   | Exercise type | Mode          | Outcomes | SMD or MD (95% CI)   | Effect size | P      | I <sup>2</sup> | GRADE |
|------------------|--------|--------------|---------|---------------|---------------|----------|----------------------|-------------|--------|----------------|-------|
| Salhab (2019)    | RCT    | HD           | 5(282)  | AE            | Intradialytic | PCS      | SMD:1.82(-0.92,4.55) | Large       | 0.19   | 98.0%          | ⊕○○○  |
| Chung (2016)     | RCT    | HD           | 6(229)  | Mixed         | Intradialytic | PCS      | SMD:0.46(0.20,0.73)  | Small       | <0.001 | 1.90%          | ⊕⊕○○  |
| Zhang (2021)     | RCT    | HD           | 7(297)  | RT            | Intradialytic | PCS      | SMD:0.23(-0.00,0.46) | Small       | 0.055  | 0.0%           | ⊕⊕○○  |
| Pu (2019)        | RCT    | HD           | 10(320) | Mixed         | Intradialytic | PCS      | SMD:0.57(0.14,1.01)  | Moderate    | 0.01   | 70.0%          | ⊕○○○  |
| Zhao (2019)      | RCT    | Dialysis     | 5(186)  | Mixed         | -             | PCS      | SMD:0.31(0.02,0.61)  | Small       | 0.04   | 46.0%          | ⊕⊕○○  |
| Huang (2019)     | RCT    | HD           | 7(263)  | Mixed         | Mixed         | PCS      | SMD:0.34(0.09,0.59)  | Small       | 0.007  | 27.0%          | ⊕⊕○○  |
| Matsuzawa (2017) | RCT    | HD           | 9(264)  | Mixed         | Mixed         | PCS      | SMD:0.53(0.52,0.82)  | Moderate    | <0.001 | 19.0%          | ⊕○○○  |
| Sheng (2014)     | RCT    | HD           | 7(256)  | Mixed         | Intradialytic | PCS      | SMD:0.30(0.05,0.55)  | Small       | 0.02   | 39.5%          | ⊕○○○  |
| Neto (2018)      | RCT    | HD           | 7(187)  | Mixed         | Intradialytic | PCS      | SMD:0.50(-0.19,1.18) | Moderate    | 0.16   | 62.0%          | ⊕○○○  |
| Salhab (2019)    | RCT    | HD           | 5(282)  | AE            | Intradialytic | MCS      | SMD:1.02(0.31,1.73)  | Large       | 0.005  | 75.0%          | ⊕○○○  |
| Chung (2016)     | RCT    | HD           | 5(193)  | Mixed         | Intradialytic | MCS      | SMD:0.23(-0.05,0.52) | Small       | 0.109  | 0.0%           | ⊕⊕○○  |
| Zhang (2021)     | RCT    | HD           | 7(297)  | RT            | Intradialytic | MCS      | SMD:0.13(-0.10,0.36) | Small       | 0.082  | 46.5%          | ⊕⊕○○  |
| Pu (2019)        | RCT    | HD           | 8(219)  | Mixed         | Intradialytic | MCS      | SMD:0.19(-0.09,0.46) | Small       | 0.18   | 30.0%          | ⊕⊕○○  |
| Zhao (2019)      | RCT    | Dialysis     | 5(186)  | Mixed         | -             | MCS      | SMD:0.30(-0.20,0.80) | Small       | 0.24   | 64.0%          | ⊕○○○  |
| Huang (2019)     | RCT    | HD           | 7(263)  | Mixed         | Mixed         | MCS      | SMD:0.27(0.02,0.51)  | Small       | 0.03   | 0.0%           | ⊕⊕○○  |
| Matsuzawa (2017) | RCT    | HD           | 8(228)  | Mixed         | Mixed         | MCS      | SMD:0.14(-0.15,0.42) | Small       | 0.34   | 10.0%          | ⊕○○○  |
| Sheng (2014)     | RCT    | HD           | 5(167)  | Mixed         | Intradialytic | MCS      | SMD:0.14(-0.16,0.43) | Small       | 0.37   | 14.8%          | ⊕○○○  |

|               |               |             |         |       |               |                                   |                       |          |       |       |      |
|---------------|---------------|-------------|---------|-------|---------------|-----------------------------------|-----------------------|----------|-------|-------|------|
| Neto (2018)   | RCT           | HD          | 7(185)  | Mixed | Intradialytic | MCS                               | SMD:0.39(-0.19,0.98)  | Small    | 0.19  | 50.0% | ⊕○○○ |
| Pei (2019)    | RCT/quasi-RCT | Mixed       | 6(522)  | AE    | -             | Physical function (SF-36)         | MD:8.36(-1.24,17.95)  | -        | 0.09  | 76.0% | ⊕○○○ |
| Pei (2019)    | RCT/quasi-RCT | Mixed       | 7(562)  | AE    | -             | Physical role (SF-36)             | MD:14.65(1.47,27.84)  | -        | 0.03  | 78.0% | ⊕○○○ |
| Pei (2019)    | RCT/quasi-RCT | Mixed       | 6(447)  | AE    | -             | Social function (SF-36)           | MD:8.24(-1.09,17.58)  | -        | 0.08  | 85.0% | ⊕○○○ |
| Pei (2019)    | RCT/quasi-RCT | Mixed       | 6(513)  | AE    | -             | Pain (SF-36)                      | MD:5.94(1.65,10.23)   | -        | 0.007 | 49.0% | ⊕○○○ |
| Pei (2019)    | RCT/quasi-RCT | Mixed       | 7(562)  | AE    | -             | General health (SF-36)            | MD:8.90(2.48,15.32)   | -        | 0.007 | 71.0% | ⊕○○○ |
| Pei (2019)    | RCT/quasi-RCT | Mixed       | 6(542)  | AE    | -             | Mental health (SF-36)             | MD:7.30(-0.94,15.54)  | -        | 0.08  | 84.0% | ⊕○○○ |
| Cheema (2014) | RCT           | Predialysis | 6 (223) | RT    | -             | HRQOL                             | SMD:0.83(0.51,1.16)   | Large    | 0.226 | 27.8% | ⊕⊕○○ |
| Oguchi (2018) | RCT           | KTRs        | 4(179)  | Mixed | -             | HRQOL                             | SMD:0.54(0.02,1.07)   | Moderate | 0.04  | 58.0% | ⊕○○○ |
| Ju (2020)     | RCT           | Mixed       | 3 (387) | Mixed | -             | Symptom/problem (KDQOL)           | SMD:1.92(-1.06,4.90)  | Large    | 0.21  | 99.0% | ⊕○○○ |
| Ju (2020)     | RCT           | Mixed       | 3 (387) | Mixed | -             | Effects of kidney disease (KDQOL) | SMD:-3.69(-8.56,1.19) | Large    | 0.14  | 99.0% | ⊕○○○ |
| Ju (2020)     | RCT           | Mixed       | 3 (387) | Mixed | -             | Burden of kidney disease (KDQOL)  | SMD:1.04 (-0.75,2.82) | Large    | 0.26  | 98.0% | ⊕○○○ |

Abbreviation: RCT = randomized controlled trial; AE = aerobic exercise; RT = resistance training; COM = combine; HRQOL = health-related quality of life; PCS = physical component summary; MCS = mental component summary; SMD = standardized mean difference; MD = mean difference; HD = hemodialysis; KTRs = kidney transplant recipients; SF-36 = Short-Form Health Survey-36; KDQOL = kidney disease quality of life; GRADE = Grading of Recommendations Assessment,



1  
2  
3  
4  
5  
6  
7  
8  
9  
10  
11  
12  
13  
14  
15  
16  
17  
18  
19  
20  
21  
22  
23  
24  
25  
26  
27  
28  
29  
30  
31  
32  
33  
34  
35  
36  
37  
38  
39  
40  
41  
42  
43  
44  
45  
46

Development, and Evaluation.

For peer review only

**Supplementary Table S1 The detailed search strategy**

| Databases | #  | Search strategy                                                                                                                                                                        |
|-----------|----|----------------------------------------------------------------------------------------------------------------------------------------------------------------------------------------|
| Pubmed    | 1  | "renal insufficiency, chronic"[MeSH Terms]                                                                                                                                             |
|           | 2  | "chronic renal insufficiency"[Title/Abstract] or "chronic kidney insufficiency"[Title/Abstract] or "chronic kidney disease"[Title/Abstract] or "chronic renal disease"[Title/Abstract] |
|           | 3  | "CKD"[Title/Abstract] or "CKF"[Title/Abstract] or "CRD"[Title/Abstract] or "CRF"[Title/Abstract]                                                                                       |
|           | 4  | "end-stage kidney"[Title/Abstract] or "end-stage renal"[Title/Abstract] or "endstage kidney"[Title/Abstract] or "endstage renal"[Title/Abstract]                                       |
|           | 5  | "ESRD"[Title/Abstract] or "ESRF"[Title/Abstract] or "ESKD"[Title/Abstract] or "ESKF"[Title/Abstract]                                                                                   |
|           | 6  | "Renal Replacement Therapy"[MeSH Terms]                                                                                                                                                |
|           | 7  | "dialysis"[Title/Abstract]                                                                                                                                                             |
|           | 8  | "hemodialysis"[Title/Abstract] or "haemodialysis"[Title/Abstract] or "hemodiafiltration"[Title/Abstract] or "haemodiafiltration"[Title/Abstract] or "HD"[Title/Abstract]               |
|           | 9  | "PD"[Title/Abstract]                                                                                                                                                                   |
|           | 10 | "renal transplantation"[Title/Abstract] or "kidney grafting"[Title/Abstract] or "kidney transplantation"[Title/Abstract]                                                               |
|           | 11 | "KTRs"[Title/Abstract]                                                                                                                                                                 |
|           | 12 | #1 or #2 or #3 or #4 or #5 or #6 or #7 or #8 or #9 or #10 or #11                                                                                                                       |
|           | 13 | "Exercise"[MeSH Terms]                                                                                                                                                                 |
|           | 14 | "Exercise Movement Techniques"[MeSH Terms]                                                                                                                                             |
|           | 15 | "Exercise Therapy"[MeSH Terms]                                                                                                                                                         |
|           | 16 | "Sports"[MeSH Terms]                                                                                                                                                                   |
|           | 17 | "train"[Title/Abstract] or "physical activity"[Title/Abstract] or "exercise"[Title/Abstract]                                                                                           |
|           | 18 | #13 or #14 or #15 or #16 or #17                                                                                                                                                        |
|           | 19 | "Systematic Review"[Publication Type] or "Systematic Reviews as Topic"[MeSH Terms]                                                                                                     |
|           | 20 | "meta analysis"[Publication Type] or "Meta-Analysis as Topic"[MeSH Terms]                                                                                                              |

1  
2  
3  
4  
5  
6  
7  
8  
9  
10  
11  
12  
13  
14  
15  
16  
17  
18  
19  
20  
21  
22  
23  
24  
25  
26  
27  
28  
29  
30  
31  
32  
33  
34  
35  
36  
37  
38  
39  
40  
41  
42  
43  
44  
45  
46

|      |    |                                                                                                                                    |
|------|----|------------------------------------------------------------------------------------------------------------------------------------|
|      | 21 | "Systematic Review"[Title/Abstract] or "system review"[Title/Abstract] or "data pooling"[Title/Abstract] or "meta"[Title/Abstract] |
|      | 22 | #19 or #20 or #21                                                                                                                  |
|      | 23 | #12 and #18 and #22                                                                                                                |
| CDSR | 1  | MeSH descriptor: [Kidney Diseases] explode all trees                                                                               |
|      | 2  | ("chronic kidney disease") or ("chronic renal disease") or ("chronic kidney failure") or ("chronic renal failure"):ti,ab,kw        |
|      | 3  | (CKF or CKD or CRF or CRD):ti,ab,kw                                                                                                |
|      | 4  | ("end-stage kidney") or ("end-stage renal") or ("endstage kidney") or ("endstage renal"):ti,ab,kw                                  |
|      | 5  | ESRD or ESRF or ESKD or ESKF:ti,ab,kw                                                                                              |
|      | 6  | MeSH descriptor: [Renal Replacement Therapy] explode all trees                                                                     |
|      | 7  | dialysis:ti,ab,kw                                                                                                                  |
|      | 8  | (hemodialysis or haemodialysis or hemodiafiltration or haemodiafiltration or HD):ti,ab,kw                                          |
|      | 9  | PD:ti,ab,kw                                                                                                                        |
|      | 10 | ("renal transplantation") or ("kidney grafting") or ("kidney transplantation"):ti,ab,kw                                            |
|      | 11 | KTRs:ti,ab,kw                                                                                                                      |
|      | 12 | #1 or #2 or #3 or #4 or #5 or #6 or #7 or #8 or #9 or #10 or #11                                                                   |
|      | 13 | MeSH descriptor: [Exercise] explode all trees                                                                                      |
|      | 14 | MeSH descriptor: [Exercise Movement Techniques] explode all trees                                                                  |
|      | 15 | MeSH descriptor: [Exercise Therapy] explode all trees                                                                              |
|      | 16 | MeSH descriptor: [Sports] explode all trees                                                                                        |
|      | 17 | (train or ("physical activity") or exercise):ti,ab,kw                                                                              |
|      | 18 | #13 or #14 or #15 or #16 or #17                                                                                                    |
|      | 19 | MeSH descriptor: [Meta-Analysis as Topic] explode all trees                                                                        |
|      | 20 | MeSH descriptor: [Systematic Reviews as Topic] explode all trees                                                                   |
|      | 21 | ("systematic review") or ("system review") or ("data pooling") or (meta):ti,ab,kw                                                  |
|      | 22 | #19 or #20 or #21                                                                                                                  |

|                |    |                                                                                                                                              |
|----------------|----|----------------------------------------------------------------------------------------------------------------------------------------------|
|                | 23 | #12 and #18 and #22                                                                                                                          |
| Embase         | 1  | 'kidney disease'/exp                                                                                                                         |
|                | 2  | ('chronic kidney disease' or 'chronic renal disease' or 'chronic kidney failure' or 'chronic renal failure'):ti,ab,kw                        |
|                | 3  | (CKF or CKD or CRF or CRD):ti,ab,kw                                                                                                          |
|                | 4  | ('end-stage kidney' or 'end-stage renal' or 'endstage kidney' or 'endstage renal'):ti,ab,kw                                                  |
|                | 5  | (ESRD or ESRF or ESKD or ESKF):ti,ab,kw                                                                                                      |
|                | 6  | 'renal replacement therapy'/exp                                                                                                              |
|                | 7  | 'dialysis':ti,ab,kw                                                                                                                          |
|                | 8  | (hemodialysis or haemodialysis or hemofiltration or haemofiltration or hemodiafiltration or haemodiafiltration or HD):ti,ab,kw               |
|                | 9  | PD:ti,ab,kw                                                                                                                                  |
|                | 10 | ('renal transplantation' or 'kidney grafting' or 'kidney transplantation'):ti,ab,kw                                                          |
|                | 11 | KTRs:ti,ab,kw                                                                                                                                |
|                | 12 | #1 or #2 or #3 or #4 or #5 or #6 or #7 or #8 or #9 or #10 or #11                                                                             |
|                | 13 | 'exercise'/exp                                                                                                                               |
|                | 14 | 'physical activity'/exp                                                                                                                      |
|                | 15 | 'sport'/exp                                                                                                                                  |
|                | 16 | (train or 'physical activity' or exercise):ti,ab,kw                                                                                          |
|                | 17 | #13 or #14 or #15 or #16                                                                                                                     |
|                | 18 | 'systematic review (topic)'/exp or 'systematic review'/exp                                                                                   |
|                | 19 | 'meta analysis (topic)'/exp or 'meta analysis'/exp                                                                                           |
|                | 20 | ('systematic review' or 'system review' or 'data pooling' or meta):ti,ab,kw                                                                  |
|                | 21 | #18 or #19 or #20                                                                                                                            |
|                | 22 | #12 and #17 and #21                                                                                                                          |
| Web of Science | 1  | TS: ("chronic kidney disease" or "chronic renal disease" or "chronic kidney failure" or "chronic renal failure" or CKD or CRD or CKF or CRF) |

1  
2  
3  
4  
5  
6  
7  
8  
9  
10  
11  
12  
13  
14  
15  
16  
17  
18  
19  
20  
21  
22  
23  
24  
25  
26  
27  
28  
29  
30  
31  
32  
33  
34  
35  
36  
37  
38  
39  
40  
41  
42  
43  
44  
45  
46

|  |   |                                                                                                                                                                            |
|--|---|----------------------------------------------------------------------------------------------------------------------------------------------------------------------------|
|  | 2 | TS: ("end-stage kidney" or "end-stage renal" or "endstage kidney" or "endstage renal" or ESKD or ESKF or ESRD or ESRF)                                                     |
|  | 3 | TS: ("renal replacement therapy" or dialysis or hemodialysis or haemodialysis or hemofiltration or haemofiltration or hemodiafiltration or haemodiafiltration or HD or PD) |
|  | 4 | TS: ("renal transplantation" or "kidney grafting" or "kidney transplantation" or KTRs)                                                                                     |
|  | 5 | #1 or #2 or #3 or #4                                                                                                                                                       |
|  | 6 | TS: (train or exercise or "physical activity")                                                                                                                             |
|  | 7 | TS: ("systematic review" or "system review" or "data pooling" or meta)                                                                                                     |
|  | 8 | #1 and #2 and #3 and #4 and #5                                                                                                                                             |

**Supplementary Table S2** The characteristic of excluded studies

| Studies                 | Reasons for exclusion           |
|-------------------------|---------------------------------|
| Nantakool et al (2020)  | Non predefine outcome           |
| Sawant et al (2014)     | Non predefine outcome           |
| Smart et al (2014)      | Duplicate literature            |
| Barcellos et al (2015)  | Meta-analysis was not conducted |
| Yang et al (2020)       | Non predefine outcome           |
| Young et al (2018)      | Included cases<100              |
| Phan et al (2015)       | Duplicate literature            |
| Molsted et al (2019)    | Included cases<100              |
| Segura et al (2010)     | Non-English                     |
| Ferreira et al (2020)   | Non predefine outcome           |
| Koufaki et al (2013)    | Meta-analysis was not conducted |
| Smart et al (2012)      | Abstracts                       |
| Howden et al (2012)     | Meta-analysis was not conducted |
| Calella et al (2019)    | Meta-analysis was not conducted |
| Singh et al (2005)      | Meta-analysis was not conducted |
| Cardoso et al (2020)    | Non predefine outcome           |
| Villanego et al (2020)  | Non-English                     |
| Medeiros et al (2017)   | Intervention did not fit        |
| Macdonald et al (2009)  | Meta-analysis was not conducted |
| Wen et al (2019)        | Non predefine outcome           |
| Yang et al (2015)       | Non predefine outcome           |
| Thangarasa et al (2018) | Included cases<100              |
| Chan et al (2016)       | Meta-analysis was not conducted |

1  
2  
3  
4  
5  
6  
7  
8  
9  
10  
11  
12  
13  
14  
15  
16  
17  
18  
19  
20  
21  
22  
23  
24  
25  
26  
27  
28  
29  
30  
31  
32  
33  
34  
35  
36  
37  
38  
39  
40  
41  
42  
43  
44  
45  
46

|                        |                                 |
|------------------------|---------------------------------|
| Johansen et al (2010)  | Intervention did not fit        |
| Thompson et al (2020)  | Correction for published paper  |
| Bakaloudi et al (2020) | Meta-analysis was not conducted |
| Kirkman et al (2019)   | Meta-analysis was not conducted |
| Afsar et al (2018)     | Meta-analysis was not conducted |

For peer review only

Supplementary Table S3 The basic characteristics of the included meta-analyses

| Author (year)   | Design                | Stage of CKD         | k (n)   | Exercise type | Mode          | Outcomes                  | SMD or MD(95% CI)      | Effect size | <i>P</i> | <i>I</i> <sup>2</sup> | GRADE    |
|-----------------|-----------------------|----------------------|---------|---------------|---------------|---------------------------|------------------------|-------------|----------|-----------------------|----------|
| Pei (2019)      | RCT/quasi-RCT         | Mixed                | 17(464) | AE            | -             | VO <sub>2peak</sub>       | MD:2.08 (1.1,3.05)     | -           | <0.001   | 25.0%                 | Low      |
|                 |                       |                      | 5 (445) |               |               | STS 60                    | MD:2.08 (1.1,3.05)     | -           | 0.98     | 82.0%                 | Very low |
|                 |                       |                      | 8 (496) |               |               | 6MWT                      | MD:0.04 (-0.52, 0.59)  | -           | 0.9      | 86.0%                 | Very low |
|                 |                       |                      | 12(514) |               |               | SBP                       | MD:-2.91 (-6.68, 0.87) | -           | 0.13     | 40.0%                 | Low      |
|                 |                       |                      | 12(514) |               |               | DBP                       | MD:-1.11 (-3.41, 1.20) | -           | 0.35     | 0.0%                  | Low      |
|                 |                       |                      | 6(522)  |               |               | Physical function (SF-36) | MD:8.36(-1.24,17.95)   | -           | 0.09     | 76.0%                 | Very low |
|                 |                       |                      | 7(562)  |               |               | Physical role (SF-36)     | MD:14.65(1.47,27.84)   | -           | 0.03     | 78.0%                 | Very low |
|                 |                       |                      | 6(447)  |               |               | Social function (SF-36)   | MD:8.24(-1.09,17.58)   | -           | 0.08     | 85.0%                 | Very low |
|                 |                       |                      | 6(513)  |               |               | Pain (SF-36)              | MD:5.94(1.65,10.23)    | -           | 0.007    | 49.0%                 | Very low |
|                 |                       |                      | 7(562)  |               |               | General health (SF-36)    | MD:8.90(2.48,15.32)    | -           | 0.007    | 71.0%                 | Very low |
| 6(542)          | Mental health (SF-36) | MD:7.30(-0.94,15.54) | -       | 0.08          | 84.0%         | Very low                  |                        |             |          |                       |          |
| Ferreira (2019) | RCT/quasi-RCT         | HD                   | 10(346) | AE            | Intradialytic | Kt/V                      | SMD:2.21(1.17,3.25)    | Large       | <0.001   | 92.0%                 | Very low |
| Cheema (2014)   | RCT                   | Predialysis          | 7(249)  | RT            | -             | Muscle Strength           | SMD:1.15 (0.80-1.49)   | Large       | 0.161    | 35.0%                 | Low      |
|                 |                       |                      | 6(223)  |               |               | HRQoL                     | SMD:0.83(0.51-1.16)    | Large       | 0.226    | 27.8%                 | Low      |
| Wu (2020)       | RCT/quasi-RCT         | Predialysis          | 3(204)  | AE+RT         | -             | SBP                       | SMD:-0.19(-0.46,0.08)  | Small       | 0.16     | 50.0%                 | Very low |
|                 |                       |                      | 4(194)  |               |               | DBP                       | SMD:-0.47(-1.10,0.15)  | Small       | 0.14     | 70.0%                 | Very low |



|                 |                |             |         |       |               |                     |                        |          |        |       |          |
|-----------------|----------------|-------------|---------|-------|---------------|---------------------|------------------------|----------|--------|-------|----------|
| Nakamura (2020) | RCT/cross-over | Predialysis | 10(401) | Mixed | -             | VO <sub>2peak</sub> | SMD:0.88(0.53,1.23)    | Large    | <0.001 | 56.0% | Low      |
|                 |                |             | 4(119)  |       |               | Muscle Strength     | SMD:0.35(-0.03,0.73)   | Small    | 0.07   | 7.0%  | Very low |
|                 |                |             | 5(392)  |       |               | 6MWT                | SMD:1.04(0.17,1.90)    | Large    | 0.02   | 92.0% | Very low |
|                 |                |             | 3(170)  |       |               | TUGT                | SMD:-0.42(-0.73,-0.11) | Small    | 0.007  | 0.0%  | Very low |
| Lu (2019)       | RCT            | Dialysis    | 11(300) | Mixed | Mixed         | 6MWT                | MD:67.6(49.93,85.26)   | -        | <0.001 | 30.6% | Moderate |
|                 |                |             | 3(193)  |       |               | STS 10              | MD:-4.69(-9.01,-0.38)  | -        | 0.028  | 72.2% | Very low |
|                 |                |             | 5(234)  |       |               | HGS                 | MD:5.35(3.34,7.37)     | -        | <0.001 | 0.3%  | Low      |
|                 |                |             | 7(224)  |       |               | Muscle strength     | MD:3.67(1.37,5.97)     | -        | 0.020  | 38.6% | Low      |
|                 |                |             | 6(240)  |       |               | STS 30              | MD:2.43(0.91,3.96)     | -        | 0.002  | 21.2% | Low      |
| Chen (2019)     | RCT            | KTRs        | 5(198)  | Mixed | -             | SBP                 | SMD:0.18(-0.10,0.46)   | Small    | 0.21   | 0.0%  | Very low |
|                 |                |             | 5(198)  |       |               | DBP                 | SMD:0.04(-0.45,0.52)   | Small    | 0.89   | 59.0% | Very low |
|                 |                |             | 4(166)  |       |               | BMI                 | SMD:0.02(-0.28,0.33)   | Small    | 0.89   | 0.0%  | Very low |
|                 |                |             | 6(202)  |       |               | VO <sub>2peak</sub> | SMD:0.33(-0.02,0.69)   | Small    | 0.06   | 27.0% | Very low |
| Song (2018)     | RCT            | HD          | 4(141)  | Mixed | Mixed         | RLS                 | SMD:-1.79(-2.21,-1.37) | Large    | <0.001 | 87.0% | Very low |
|                 |                |             | 3(139)  |       |               | Fatigue             | SMD:-0.85(-1.20,-0.50) | Large    | <0.001 | 0.0%  | Very low |
| Salhab (2019)   | RCT            | HD          | 5(282)  | AE    | Intradialytic | PCS                 | SMD:1.82(-0.92,4.55)   | Large    | 0.19   | 98.0% | Very low |
|                 |                |             | 5(282)  |       |               | MCS                 | SMD:1.02(0.31,1.73)    | Large    | 0.005  | 75.0% | Very low |
| Andrade (2019)  | RCT            | HD          | 5(201)  | AE+RT | Intradialytic | VO <sub>2peak</sub> | SMD:1.01(0.71,1.30)    | Large    | <0.001 | 0.0%  | Low      |
| Chung (2016)    | RCT            | HD          | 4(127)  | Mixed | Intradialytic | 6MWT                | SMD:0.44(0.09,0.80)    | Small    | 0.015  | 0.0%  | Low      |
|                 |                |             | 6(238)  |       |               | VO <sub>2peak</sub> | SMD:0.55(0.18,0.92)    | Moderate | 0.003  | 52.9% | Very low |
|                 |                |             | 6(229)  |       |               | PCS                 | SMD:0.46(0.20,0.73)    | Small    | <0.001 | 1.90% | Low      |
|                 |                |             | 5(193)  |       |               | MCS                 | SMD:0.23(-0.05,0.52)   | Small    | 0.109  | 0.0%  | Low      |
| Zhang (2021)    | RCT            | HD          | 8(299)  | RT    | Intradialytic | 6MWT                | SMD:0.52(0.28,0.75)    | Moderate | <0.001 | 18.7% | Very low |
|                 |                |             | 5(164)  |       |               | STS 30              | SMD:0.42(0.11,0.74)    | Small    | 0.008  | 0.0%  | Very low |

|                    |     |             |         |       |               |                     |                        |          |        |       |          |
|--------------------|-----|-------------|---------|-------|---------------|---------------------|------------------------|----------|--------|-------|----------|
|                    |     |             | 6(300)  |       |               | HGS                 | SMD:0.35(0.12,0.58)    | Small    | 0.003  | 41.6% | Very low |
|                    |     |             | 7(297)  |       |               | PCS                 | SMD:0.23(-0.00,0.46)   | Small    | 0.055  | 0.0%  | Very low |
|                    |     |             | 7(297)  |       |               | MCS                 | SMD:0.13(-0.10,0.36)   | Small    | 0.082  | 46.5% | Very low |
| Pu<br>(2019)       | RCT | HD          | 10(301) | Mixed | Intradialytic | Kt/V                | SMD:0.29(0.06,0.52)    | Small    | 0.01   | 0.0%  | Very low |
|                    |     |             | 10(400) |       |               | VO <sub>2peak</sub> | SMD:0.57(0.23,0.90)    | Moderate | <0.001 | 59.0% | Low      |
|                    |     |             | 7(219)  |       |               | 6MWT                | SMD:0.57(0.30,0.84)    | Moderate | <0.001 | 0.0%  | Low      |
|                    |     |             | 10(320) |       |               | PCS                 | SMD:0.57(0.14,1.01)    | Moderate | 0.01   | 70.0% | Very low |
|                    |     |             | 8(219)  |       |               | MCS                 | SMD:0.19(-0.09,0.46)   | Small    | 0.18   | 30.0% | Low      |
|                    |     |             | 7(287)  |       |               | SBP                 | SMD:-0.28(-0.52,-0.05) | Small    | 0.02   | 0.0%  | Very low |
|                    |     |             | 7(287)  |       |               | DBP                 | SMD:-0.32(-0.55,-0.08) | Small    | 0.008  | 42.0% | Very low |
| Yamamoto<br>(2021) | RCT | Predialysis | 10(392) | AE    | -             | SBP                 | SMD:-0.75(-1.24,-0.26) | Moderate | 0.003  | 80.3% | Very low |
|                    |     |             | 10(365) |       |               | VO <sub>2peak</sub> | SMD:0.54(0.29,0.78)    | Moderate | <0.001 | 24.6% | Very low |
|                    |     |             | 10(414) |       |               | BMI                 | SMD:-0.19(-0.38,-0.00) | Small    | 0.026  | 0.0%  | Low      |
| Thompson<br>(2019) | RCT | Predialysis | 10(335) | Mixed | -             | SBP                 | MD:-4.3(-9.0,0.4)      | -        | N.P.   | 50.4% | Very low |
|                    |     |             | 8(303)  |       |               | DBP                 | MD:-1.18(-4.76,2.40)   | -        | N.P.   | 60.5% | Very low |
| Yang<br>(2017)     | RCT | Mixed       | 4(150)  | Mixed | -             | VO <sub>2peak</sub> | SMD:0.33(0.03,0.63)    | Small    | 0.003  | 47.0% | Low      |
| Clarkson<br>(2019) | RCT | Dialysis    | 18(744) | Mixed | -             | 6MWT                | MD:33.64(23.74,43.54)  | -        | <0.001 | 0.0%  | Moderate |
| Zhao<br>(2019)     | RCT | Dialysis    | 3(141)  | Mixed | -             | Fatigue             | SMD:-0.97(-1.32,-0.62) | Large    | <0.001 | 47.0% | Low      |
|                    |     |             | 5(186)  |       |               | PCS                 | SMD:0.31(0.02,0.61)    | Small    | 0.04   | 46.0% | Low      |
|                    |     |             | 5(186)  |       |               | MCS                 | SMD:0.30(-0.20,0.80)   | Small    | 0.24   | 64.0% | Very low |
| Zhang<br>(2019)    | RCT | Predialysis | 14(463) | Mixed | -             | SBP                 | SMD:-0.41(-0.70,-0.11) | Small    | 0.007  | 55.0% | Moderate |
|                    |     |             | 12(399) |       |               | DBP                 | SMD:-0.31(-0.71,0.08)  | Small    | 0.12   | 70.0% | Low      |
|                    |     |             | 13(466) |       |               | BMI                 | SMD:-0.21(-0.39,-0.03) | Small    | 0.02   | 0.0%  | Moderate |

|                  |               |       |         |       |   |                     |                        |          |        |       |          |
|------------------|---------------|-------|---------|-------|---|---------------------|------------------------|----------|--------|-------|----------|
| Huang (2019)     | RCT           | HD    | 8(257)  | Mixed | - | Kt/V                | SMD:0.19(-0.06,0.43)   | Small    | 0.14   | 0.0%  | Very low |
|                  |               |       | 7(260)  |       |   | SBP                 | SMD:-0.17(-0.41,0.08)  | Small    | 0.18   | 8.0%  | Low      |
|                  |               |       | 7(260)  |       |   | DBP                 | SMD:-0.23(-0.69,0.24)  | Small    | 0.34   | 68.0% | Very low |
|                  |               |       | 7(205)  |       |   | 6MWT                | SMD:1.01(0.26,1.76)    | Large    | 0.008  | 83.0% | Very low |
|                  |               |       | 7(263)  |       |   | PCS                 | SMD:0.34(0.09,0.59)    | Small    | 0.007  | 27.0% | Low      |
|                  |               |       | 7(263)  |       |   | MCS                 | SMD:0.27(0.02,0.51)    | Small    | 0.03   | 0.0%  | Low      |
|                  |               |       | 10(371) |       |   | VO <sub>2peak</sub> | SMD:0.73(0.52,0.95)    | Moderate | <0.001 | 71.0% | Low      |
| Heiwe (2011)     | RCT/quasi-RCT | Mixed | 24(847) | Mixed | - | Aerobic capacity    | SMD:-0.56(-0.70,-0.42) | Moderate | <0.001 | 12.0% | Moderate |
|                  |               |       | 9(358)  |       |   | Muscle strength     | SMD:-0.52(-0.73,-0.31) | Moderate | <0.001 | 0.0%  | Low      |
|                  |               |       | 7(191)  |       |   | Walking capacity    | SMD:-0.48(-0.79,-0.17) | Small    | 0.003  | 2.0%  | Low      |
|                  |               |       | 9(347)  |       |   | SBP                 | SMD:0.25(0.04,0.47)    | Small    | 0.02   | 0.0%  | Low      |
|                  |               |       | 11(419) |       |   | DBP                 | SMD:0.16(-0.04,0.36)   | Small    | 0.11   | 40.0% | High     |
| Heiwe (2014)     | RCT           | HD    | 21(374) | Mixed | - | Aerobic capacity    | SMD:-0.80(-1.02,-0.58) | Large    | <0.001 | 0.0%  | Low      |
|                  |               |       | 10(212) |       |   | DBP                 | SMD:0.17(-0.16,0.49)   | Small    | 0.3    | 45.0% | Low      |
|                  |               |       | 10(312) |       |   | SBP                 | SMD:0.04(-0.4,0.41)    | Small    | 0.8    | 58.0% | Very low |
|                  |               |       | 10(385) |       |   | Muscle strength     | SMD:-0.56(-0.77,-0.35) | Moderate | <0.001 | 0.0%  | Very low |
|                  |               |       | 7(174)  |       |   | Walking capacity    | SMD:-0.33(-0.67,0.01)  | Small    | 0.06   | 16.0% | Low      |
| Matsuzawa (2017) | RCT           | HD    | 18(582) | Mixed | - | VO <sub>2peak</sub> | SMD:0.62(0.38,0.87)    | Moderate | <0.001 | 49.0% | High     |
|                  |               |       | 10(326) |       |   | 6MWT                | SMD:0.58(0.24,0.93)    | Moderate | <0.001 | 53.0% | Low      |
|                  |               |       | 9(281)  |       |   | Muscle strength     | SMD:0.94(0.67,1.21)    | Large    | <0.001 | 10.0% | Very low |
|                  |               |       | 9(264)  |       |   | PCS                 | SMD:0.53(0.52,0.82)    | Moderate | <0.001 | 19.0% | Very low |
|                  |               |       | 8(228)  |       |   | MCS                 | SMD:0.14(-0.15,0.42)   | Small    | 0.34   | 10.0% | Very low |
| Smart (2011)     | RCT           | HD    | 8(365)  | Mixed | - | VO <sub>2peak</sub> | SMD:0.75(0.39,1.11)    | Moderate | <0.001 | 60.0% | Low      |
| Bogataj          | RCT           | HD    | 19(571) | Mixed | - | 6MWT                | SMD:0.44(0.21,0.67)    | Small    | <0.001 | 49.6% | Very low |

|                 |     |             |         |       |               |                     |                        |          |        |       |          |
|-----------------|-----|-------------|---------|-------|---------------|---------------------|------------------------|----------|--------|-------|----------|
| (2020)          |     |             | 20(504) |       |               | VO <sub>2peak</sub> | SMD:0.58(0.32,0.85)    | Moderate | <0.001 | 57.4% | Very low |
|                 |     |             | 5(461)  |       |               | STS 10              | SMD:-0.55(-1.00,-0.09) | Moderate | 0.019  | 71.6% | Very low |
| Sheng (2014)    | RCT | HD          | 7(233)  | Mixed | Intradialytic | Kt/V                | SMD:0.27(0.01,0.53)    | Small    | 0.040  | 0.0%  | Very low |
|                 |     |             | 7(310)  |       |               | VO <sub>2peak</sub> | SMD:0.53(0.30,0.76)    | Moderate | <0.001 | 36.0% | Very low |
|                 |     |             | 7(256)  |       |               | PCS                 | SMD:0.30(0.05,0.55)    | Small    | 0.02   | 39.5% | Very low |
|                 |     |             | 5(167)  |       |               | MCS                 | SMD:0.14(-0.16,0.43)   | Small    | 0.37   | 14.8% | Very low |
|                 |     |             | 4(146)  |       |               | 6MWT                | SMD:0.58(0.23,0.93)    | Moderate | <0.001 | 89.7% | Very low |
|                 |     |             | 7(296)  |       |               | DBP                 | SMD:-0.24(-0.47,-0.01) | Small    | 0.04   | 52.1% | Very low |
|                 |     |             | 7(296)  |       |               | SBP                 | SMD:-0.27(-0.50,-0.04) | Small    | 0.02   | 0.0%  | Very low |
|                 |     |             | 3(106)  |       |               | STS 60              | SMD:0.71(0.31,1.12)    | Moderate | <0.001 | 0.0%  | Very low |
| Neto (2018)     | RCT | HD          | 10(394) | Mixed | Intradialytic | VO <sub>2peak</sub> | SMD:0.60(0.15,1.04)    | Moderate | 0.008  | 76.0% | Very low |
|                 |     |             | 7(187)  |       |               | PCS                 | SMD:0.50(-0.19,1.18)   | Moderate | 0.16   | 62.0% | Very low |
|                 |     |             | 7(185)  |       |               | MCS                 | SMD:0.39(-0.19,0.98)   | Small    | 0.19   | 50.0% | Very low |
|                 |     |             | 6(158)  |       |               | 6MWT                | SMD:0.96(0.11,1.80)    | Large    | 0.03   | 82.0% | Very low |
|                 |     |             | 9(250)  |       |               | Muscle strength     | SMD:0.61(0.39,0.83)    | Moderate | <0.001 | 58.9% | Very low |
| Ferrari (2019)  | RCT | HD          | 12(370) | AE    | Intradialytic | Kt/V                | MD:0.08(0,0.15)        | -        | 0.04   | 56.0% | Low      |
|                 |     |             | 6(220)  | RT    |               | Kt/V                | MD:0.1(0,0.2)          | -        | 0.06   | 6.0%  | Very low |
|                 |     |             | 5(201)  | COM   |               | VO <sub>2peak</sub> | MD:5.41(4.03,6.79)     | -        | <0.001 | 0.0%  | Low      |
|                 |     |             | 7(248)  | AE    |               | VO <sub>2peak</sub> | MD:2.07(0.42,3.72)     | -        | <0.001 | 0.0%  | Very low |
|                 |     |             | 6(211)  | RT    |               | 6MWT                | MD:68.5(29.05,107.96)  | -        | <0.001 | 36.0% | Low      |
|                 |     |             | 6(188)  | AE    |               | 6MWT                | MD:64.98(43.86,86.11)  | -        | <0.001 | 0.0%  | Low      |
|                 |     |             | 10(332) | AE    |               | SBP                 | MD:-10.07(16.35,-3.78) | -        | 0.002  | 44.0% | Low      |
|                 |     |             | 10(334) | AE    |               | DBP                 | MD:-2.96(-7.71,1.78)   | -        | 0.22   | 0.0%  | Low      |
| Wyngaert (2018) | RCT | Predialysis | 8(269)  | AE    | -             | SBP                 | SMD:0.08(-0.58,0.74)   | Small    | 0.81   | 84%   | Very low |
|                 |     |             | 7(237)  | AE    |               | DBP                 | SMD:-0.09(-0.78,0.59)  | Small    | 0.79   | 83%   | Very low |

|              |     |      |         |       |   |                                   |                        |          |        |       |          |
|--------------|-----|------|---------|-------|---|-----------------------------------|------------------------|----------|--------|-------|----------|
|              |     |      | 11(325) |       |   | VO <sub>2peak</sub>               | SMD:0.99(0.49,1.48)    | Large    | <0.001 | 74.0% | Very low |
|              |     |      | 9(294)  |       |   | BMI                               | SMD:-0.36(-0.60,-0.13) | Small    | 0.002  | 48.0% | Low      |
| Oguch (2018) | RCT | KTRs | 4(182)  | Mixed | - | VO <sub>2peak</sub>               | SMD:0.38(-0.06,0.82)   | Small    | 0.09   | 45.0% | Low      |
|              |     |      | 4(179)  |       |   | HRQoL                             | SMD:0.54(0.02,1.07)    | Moderate | 0.04   | 58.0% | Very low |
| Ju (2020)    | RCT |      | 3 (115) | Mixed | - | HGS                               | SMD:0.52(0.14,0.89)    | Moderate | 0.007  | 0.0%  | Very low |
|              |     |      | 3 (387) |       |   | Symptom/problem (KDQoL)           | SMD:1.92(-1.06,4.90)   | Large    | 0.21   | 99.0% | Very low |
|              |     |      | 3 (387) |       |   | Effects of kidney disease (KDQoL) | SMD:-3.69(-8.56,1.19)  | Large    | 0.14   | 99.0% | Very low |
|              |     |      | 3 (387) |       |   | Burden of kidney disease (KDQoL)  | SMD:1.04 (-0.75,2.82)  | Large    | 0.26   | 98.0% | Very low |

Abbreviation: RCT = randomized controlled trial; AE = aerobic exercise; RT = resistance training; COM = combine; VO<sub>2peak</sub> = peak oxygen uptake; HRQoL = health-related quality of life; DBP = diastolic blood pressure; SBP = systolic blood pressure; PCS = physical component summary; MCS = mental component summary; 6MWT = 6 minutes walk test; STS 10 = sit to stand 10 test; STS 30 = sit to stand 30 test; STS 60 = sit to stand 60 test; TUGT = timed up and go test; RLS = Restless Legs Syndrome; BMI = body mass index; SMD = standardized mean difference; MD = mean difference; HD = hemodialysis; KTRs = kidney transplant recipients; SF-36 = short form-36; KDQoL = kidney disease quality of life; GRADE = Grading of Recommendations Assessment, Development, and Evaluation.

**Supplementary Table S4** Results of the assessment of the methodological quality of the included meta-analyses using AMSTAR-2

| Author         | AMSTAR-2 Items |   |   |   |   |   |   |   |   |    |    |    |    |    |    |    | Score  |
|----------------|----------------|---|---|---|---|---|---|---|---|----|----|----|----|----|----|----|--------|
|                | 1              | 2 | 3 | 4 | 5 | 6 | 7 | 8 | 9 | 10 | 11 | 12 | 13 | 14 | 15 | 16 |        |
| Pei(2019)      | √              | × | √ | ○ | √ | √ | × | √ | √ | ×  | √  | ×  | ×  | ×  | √  | ×  | 53.1%  |
| Ferreira(2019) | √              | √ | √ | ○ | √ | √ | × | ○ | √ | ×  | √  | ×  | ×  | ×  | ×  | ×  | 50.0%  |
| Cheema(2014)   | √              | × | √ | √ | √ | √ | √ | √ | √ | ×  | √  | √  | √  | √  | √  | √  | 87.5%  |
| Wu(2020)       | √              | √ | √ | ○ | √ | √ | × | √ | √ | ×  | √  | √  | √  | √  | √  | √  | 84.4%  |
| Nakamura(2020) | √              | √ | √ | ○ | √ | √ | × | √ | √ | ×  | √  | √  | √  | √  | √  | √  | 84.4%  |
| Lu(2019)       | √              | × | √ | ○ | √ | × | × | ○ | ○ | ×  | √  | ×  | ×  | ×  | √  | √  | 46.9%  |
| Chen(2019)     | √              | × | √ | ○ | × | √ | × | √ | ○ | ×  | √  | ×  | ×  | ×  | ×  | √  | 43.8%  |
| Song(2018)     | √              | × | √ | ○ | √ | √ | × | √ | √ | ×  | √  | ×  | √  | √  | √  | √  | 71.9%  |
| Salhab(2021)   | √              | √ | √ | ○ | √ | √ | × | √ | × | ×  | √  | ×  | ×  | √  | ×  | ×  | 53.1%  |
| Andrade(2019)  | √              | √ | √ | ○ | √ | √ | × | √ | √ | ×  | √  | ×  | ×  | √  | ×  | √  | 65.6%  |
| Chung(2016)    | √              | × | √ | ○ | √ | √ | √ | √ | √ | ×  | √  | √  | √  | √  | √  | ×  | 78.1%  |
| Zhang(2019)    | √              | × | √ | ○ | √ | √ | × | √ | √ | ×  | √  | ×  | √  | √  | √  | ×  | 65.6%  |
| Pu(2019)       | √              | × | √ | ○ | √ | √ | × | √ | √ | ×  | √  | √  | √  | √  | ×  | √  | 71.9%  |
| Yamamoto(2021) | √              | × | √ | × | √ | √ | × | ○ | √ | ×  | √  | √  | √  | √  | √  | √  | 71.9%  |
| Thompson(2019) | √              | × | √ | ○ | √ | √ | × | √ | √ | √  | √  | √  | √  | √  | √  | √  | 84.4%  |
| Yang(2017)     | √              | × | √ | ○ | √ | √ | × | ○ | √ | ×  | √  | √  | √  | √  | √  | √  | 75.0%  |
| Clarkson(2019) | √              | × | √ | ○ | √ | √ | × | √ | √ | ×  | √  | √  | √  | √  | √  | √  | 78.1%  |
| Zhao(2019)     | √              | × | √ | ○ | √ | √ | × | √ | √ | ×  | √  | ×  | √  | ×  | ×  | √  | 59.4%  |
| Zhang(2019)    | √              | × | √ | ○ | √ | √ | × | ○ | √ | ×  | √  | √  | ×  | ×  | √  | √  | 62.5%  |
| Huang(2019)    | √              | √ | √ | ○ | √ | √ | × | √ | √ | ×  | √  | √  | ×  | ×  | √  | √  | 71.9%  |
| Heiwe(2011)    | √              | √ | √ | √ | √ | √ | √ | √ | √ | √  | √  | √  | √  | √  | √  | √  | 100.0% |
| Heiwe(2014)    | √              | √ | √ | ○ | √ | √ | √ | √ | √ | ×  | √  | ×  | √  | √  | ×  | √  | 78.1%  |

1  
2  
3  
4  
5  
6  
7  
8  
9  
10  
11  
12  
13  
14  
15  
16  
17  
18  
19  
20  
21  
22  
23  
24  
25  
26  
27  
28  
29  
30  
31  
32  
33  
34  
35  
36  
37  
38  
39  
40  
41  
42  
43  
44  
45  
46

|                 |   |   |   |   |   |   |   |   |   |   |   |   |   |   |   |   |       |
|-----------------|---|---|---|---|---|---|---|---|---|---|---|---|---|---|---|---|-------|
| Matsuzawa(2017) | √ | √ | √ | ○ | √ | √ | × | √ | √ | × | √ | × | × | √ | √ | √ | 71.9% |
| Smart(2011)     | √ | × | √ | ○ | √ | × | × | ○ | ○ | × | √ | × | × | √ | × | × | 40.6% |
| Bogataj(2020)   | √ | × | √ | ○ | √ | × | × | √ | √ | × | √ | √ | × | √ | × | √ | 59.4% |
| Sheng(2014)     | √ | × | √ | ○ | √ | √ | √ | √ | √ | × | √ | × | × | √ | √ | × | 65.6% |
| Neto(2018)      | √ | × | √ | ○ | √ | √ | × | √ | √ | × | √ | × | × | × | × | √ | 53.1% |
| Ferrari(2019)   | √ | √ | √ | ○ | √ | √ | √ | √ | √ | × | √ | √ | √ | √ | √ | √ | 90.6% |
| Wyngaert(2018)  | √ | √ | √ | ○ | √ | √ | × | √ | √ | × | √ | √ | √ | √ | √ | √ | 84.4% |
| Oguchi(2018)    | √ | √ | √ | ○ | √ | √ | × | √ | √ | × | √ | √ | √ | × | √ | × | 71.9% |
| Ju(2020)        | √ | × | √ | ○ | × | × | × | √ | √ | × | √ | × | × | × | × | × | 34.4% |

√ mean yes; ○ mean partial yes; ×mean no.

1. Did the research questions and inclusion criteria for the review include the components of PICO? 2. Did the report of the review contain an explicit statement that the review methods were established prior to the conduct of the review and did the report justify any significant deviations from the protocol? 3. Did the review authors explain their selection of the study designs for inclusion in the review? 4. Did the review authors use a comprehensive literature search strategy? 5. Did the review authors perform study selection in duplicate? 6. Did the review authors perform data extraction in duplicate? 7. Did the review authors provide a list of excluded studies and justify the exclusions? 8. Did the review authors describe the included studies in adequate detail? 9. Did the review authors use a satisfactory technique for assessing the risk of bias (RoB) in individual studies that were included in the review? 10. Did the review authors report on the sources of funding for the studies included in the review? 11. If meta-analysis was performed did the review authors use appropriate methods for statistical combination of results? 12. If meta-analysis was performed, did the review authors assess the potential impact of RoB in individual studies on the results of the meta-analysis or other evidence synthesis? 13. Did the review authors account for RoB in individual studies when interpreting/ discussing the results of the review? 14. Did the review authors provide a satisfactory explanation for, and discussion of, any heterogeneity observed in the results of the review? 15. If they performed quantitative synthesis did the review authors carry out an adequate investigation of publication bias (small study bias) and discuss its likely impact on the results of the review? 16. Did the review authors report any potential sources of conflict of interest, including any funding they received for conducting the review?

**Supplementary Table S5:** Results of the assessment of the quality of evidence for each outcome of the included meta-analyses using GRADE

| Author                | Outcome                   | GRADE items       |                   |              |              |                   | Quality of the evidence |
|-----------------------|---------------------------|-------------------|-------------------|--------------|--------------|-------------------|-------------------------|
|                       |                           | Risk of bias      | Inconsistency     | Indirectness | Imprecision  | Publication bias  |                         |
| Pei (2019)            | VO <sub>2peak</sub>       | Very serious (-2) | Neutral           | Neutral      | Neutral      | Neutral           | Moderate                |
|                       | STS 60                    | Serious (-1)      | Very serious (-2) | Neutral      | Neutral      | Serious (-1)      | Very low                |
|                       | 6MWT                      | Serious (-1)      | Very serious (-2) | Neutral      | Neutral      | Serious (-1)      | Very low                |
|                       | SBP                       | Serious (-1)      | Neutral           | Neutral      | Neutral      | Not reported (-1) | Moderate                |
|                       | DBP                       | Serious (-1)      | Neutral           | Neutral      | Neutral      | Not reported (-1) | Moderate                |
|                       | Physical function (SF-36) | Serious (-1)      | Very serious (-2) | Neutral      | Serious (-1) | Serious (-1)      | Very low                |
|                       | Physical role (SF-36)     | Serious (-1)      | Very serious (-2) | Neutral      | Serious (-1) | Serious (-1)      | Very low                |
|                       | Social function (SF-36)   | Serious (-1)      | Very serious (-2) | Neutral      | Serious (-1) | Serious (-1)      | Very low                |
|                       | Pain (SF-36)              | Serious (-1)      | Serious (-1)      | Neutral      | Serious (-1) | Serious (-1)      | Very low                |
|                       | General health (SF-36)    | Serious (-1)      | Very serious (-2) | Neutral      | Serious (-1) | Serious (-1)      | Very low                |
| Mental health (SF-36) | Serious (-1)              | Very serious (-2) | Neutral           | Serious (-1) | Serious (-1) | Very low          |                         |
| Ferreira (2019)       | Kt/V                      | Very serious (-2) | Very serious (-2) | Neutral      | Serious (-1) | Not reported (-1) | Very low                |
| Cheema (2014)         | Muscle Strength           | Neutral           | Neutral           | Neutral      | Serious (-1) | Serious (-1)      | Moderate                |
|                       | HRQoL                     | Neutral           | Neutral           | Neutral      | Serious (-1) | Serious (-1)      | Moderate                |
| Wu (2020)             | SBP                       | Very serious (-2) | Serious (-1)      | Neutral      | Serious (-1) | Serious (-1)      | Very low                |
|                       | DBP                       | Very serious (-2) | Serious (-1)      | Neutral      | Serious (-1) | Serious (-1)      | Very low                |



1  
2  
3  
4  
5  
6  
7  
8  
9  
10  
11  
12  
13  
14  
15  
16  
17  
18  
19  
20  
21  
22  
23  
24  
25  
26  
27  
28  
29  
30  
31  
32  
33  
34  
35  
36  
37  
38  
39  
40  
41  
42  
43  
44  
45  
46

|                    |                     |                   |                   |         |                   |              |          |
|--------------------|---------------------|-------------------|-------------------|---------|-------------------|--------------|----------|
| Nakamura<br>(2020) | VO <sub>2peak</sub> | Neutral           | Serious (-1)      | Neutral | Neutral           | Serious (-1) | Moderate |
|                    | Muscle Strength     | Very serious (-2) | Neutral           | Neutral | Serious (-1)      | Serious (-1) | Very low |
|                    | 6MWT                | Neutral           | Very serious (-2) | Neutral | Serious (-1)      | Serious (-1) | Very low |
|                    | TUGT                | Serious (-1)      | Neutral           | Neutral | Serious (-1)      | Serious (-1) | Very low |
| Lu<br>(2019)       | 6MWT                | Neutral           | Neutral           | Neutral | Serious (-1)      | Neutral      | Moderate |
|                    | STS 10              | Neutral           | Serious (-1)      | Neutral | Serious (-1)      | Serious (-1) | Very low |
|                    | HGS                 | Neutral           | Neutral           | Neutral | Serious (-1)      | Serious (-1) | Moderate |
|                    | Muscle strength     | Neutral           | Neutral           | Neutral | Serious (-1)      | Serious (-1) | Moderate |
|                    | STS 30              | Neutral           | Neutral           | Neutral | Serious (-1)      | Serious (-1) | Moderate |
| Chen<br>(2019)     | SBP                 | Serious (-1)      | Neutral           | Neutral | Serious (-1)      | Serious (-1) | Very low |
|                    | DBP                 | Serious (-1)      | Serious (-1)      | Neutral | Serious (-1)      | Serious (-1) | Very low |
|                    | BMI                 | Serious (-1)      | Neutral           | Neutral | Serious (-1)      | Serious (-1) | Very low |
|                    | VO <sub>2peak</sub> | Serious (-1)      | Neutral           | Neutral | Serious (-1)      | Serious (-1) | Very low |
| Song<br>(2018)     | RLS                 | Serious (-1)      | Serious (-1)      | Neutral | Very serious (-2) | Serious (-1) | Very low |
|                    | Fatigue             | Serious (-1)      | Neutral           | Neutral | Serious (-1)      | Serious (-1) | Very low |
| Salhab<br>(2019)   | PCS                 | Not reported (-1) | Serious (-1)      | Neutral | Very serious (-2) | Serious (-1) | Very low |
|                    | MCS                 | Not reported (-1) | Serious (-1)      | Neutral | Serious (-1)      | Serious (-1) | Very low |
| Andrade<br>(2019)  | VO <sub>2peak</sub> | Neutral           | Neutral           | Neutral | Serious (-1)      | Serious (-1) | Moderate |
| Chung<br>(2019)    | 6MWT                | Neutral           | Neutral           | Neutral | Serious (-1)      | Serious (-1) | Moderate |
|                    | VO <sub>2peak</sub> | Neutral           | Serious (-1)      | Neutral | Serious (-1)      | Serious (-1) | Very low |
|                    | PCS                 | Neutral           | Neutral           | Neutral | Serious (-1)      | Serious (-1) | Moderate |
|                    | MCS                 | Neutral           | Neutral           | Neutral | Serious (-1)      | Serious (-1) | Moderate |
| Zhang<br>(2021)    | 6MWT                | Serious (-1)      | Neutral           | Neutral | Serious (-1)      | Serious (-1) | Very low |
|                    | STS 30              | Serious (-1)      | Neutral           | Neutral | Serious (-1)      | Serious (-1) | Very low |

|                    |                     |                   |              |         |              |                   |          |
|--------------------|---------------------|-------------------|--------------|---------|--------------|-------------------|----------|
|                    | HGS                 | Serious (-1)      | Neutral      | Neutral | Serious (-1) | Serious (-1)      | Very low |
|                    | PCS                 | Very serious (-2) | Neutral      | Neutral | Serious (-1) | Serious (-1)      | Very low |
|                    | MCS                 | Very serious (-2) | Neutral      | Neutral | Serious (-1) | Serious (-1)      | Very low |
| Pu<br>(2019)       | Kt/V                | Serious (-1)      | Neutral      | Neutral | Serious (-1) | Not reported (-1) | Very low |
|                    | VO <sub>2peak</sub> | Neutral           | Serious (-1) | Neutral | Neutral      | Not reported (-1) | Moderate |
|                    | 6MWT                | Neutral           | Neutral      | Neutral | Serious (-1) | Serious (-1)      | Moderate |
|                    | PCS                 | Neutral           | Serious (-1) | Neutral | Serious (-1) | Not reported (-1) | Very low |
|                    | MCS                 | Neutral           | Neutral      | Neutral | Serious (-1) | Serious (-1)      | Moderate |
|                    | SBP                 | Serious (-1)      | Neutral      | Neutral | Serious (-1) | Serious (-1)      | Very low |
|                    | DBP                 | Serious (-1)      | Neutral      | Neutral | Serious (-1) | Serious (-1)      | Very low |
| Yamamoto<br>(2021) | SBP                 | Very serious (-2) | Serious (-1) | Neutral | Serious (-1) | Serious (-1)      | Very low |
|                    | VO <sub>2peak</sub> | Very serious (-2) | Neutral      | Neutral | Serious (-1) | Neutral           | Very low |
|                    | BMI                 | Very serious (-2) | Neutral      | Neutral | Neutral      | Neutral           | Low      |
| Thompson<br>(2019) | SBP                 | Very serious (-2) | Serious (-1) | Neutral | Serious (-1) | Serious (-1)      | Very low |
|                    | DBP                 | Very serious (-2) | Serious (-1) | Neutral | Serious (-1) | Serious (-1)      | Very low |
| Yang<br>(2017)     | VO <sub>2peak</sub> | Neutral           | Neutral      | Neutral | Serious (-1) | Serious (-1)      | Low      |
| Clarkson<br>(2019) | 6MWT                | Neutral           | Neutral      | Neutral | Neutral      | Serious (-1)      | Moderate |
| Zhao<br>(2019)     | Fatigue             | Neutral           | Neutral      | Neutral | Serious (-1) | Serious (-1)      | Low      |
|                    | PCS                 | Neutral           | Neutral      | Neutral | Serious (-1) | Serious (-1)      | Low      |
|                    | MCS                 | Neutral           | Serious (-1) | Neutral | Serious (-1) | Serious (-1)      | Very low |
| Zhang<br>(2019)    | SBP                 | Neutral           | Serious (-1) | Neutral | Neutral      | Neutral           | Moderate |
|                    | DBP                 | Neutral           | Serious (-1) | Neutral | Serious (-1) | Neutral           | Low      |
|                    | BMI                 | Serious (-1)      | Neutral      | Neutral | Neutral      | Neutral           | Moderate |

1  
2  
3  
4  
5  
6  
7  
8  
9  
10  
11  
12  
13  
14  
15  
16  
17  
18  
19  
20  
21  
22  
23  
24  
25  
26  
27  
28  
29  
30  
31  
32  
33  
34  
35  
36  
37  
38  
39  
40  
41  
42  
43  
44  
45  
46

|                     |                     |                   |                   |         |                   |                   |          |
|---------------------|---------------------|-------------------|-------------------|---------|-------------------|-------------------|----------|
| Huang<br>(2019)     | Kt/V                | Very serious (-2) | Neutral           | Neutral | Serious (-1)      | Serious (-1)      | Very low |
|                     | SBP                 | Neutral           | Neutral           | Neutral | Serious (-1)      | Serious (-1)      | Low      |
|                     | DBP                 | Neutral           | Serious (-1)      | Neutral | Serious (-1)      | Serious (-1)      | Very low |
|                     | 6MWT                | Serious (-1)      | Very serious (-2) | Neutral | Serious (-1)      | Serious (-1)      | Very low |
|                     | PCS                 | Neutral           | Neutral           | Neutral | Serious (-1)      | Serious (-1)      | Low      |
|                     | MCS                 | Neutral           | Neutral           | Neutral | Serious (-1)      | Serious (-1)      | Low      |
|                     | VO <sub>2peak</sub> | Serious (-1)      | Neutral           | Neutral | Serious (-1)      | Neutral           | Low      |
| Heiwe<br>(2011)     | Aerobic capacity    | Neutral           | Neutral           | Neutral | Neutral           | Serious (-1)      | Moderate |
|                     | Muscle strength     | Neutral           | Neutral           | Neutral | Serious (-1)      | Serious (-1)      | Low      |
|                     | Walking capacity    | Neutral           | Neutral           | Neutral | Serious (-1)      | Serious (-1)      | Low      |
|                     | SBP                 | Neutral           | Neutral           | Neutral | Serious (-1)      | Serious (-1)      | Low      |
|                     | DBP                 | Neutral           | Neutral           | Neutral | Neutral           | Neutral           | High     |
| Heiwe<br>(2014)     | Aerobic capacity    | Neutral           | Neutral           | Neutral | Serious (-1)      | Not reported (-1) | Low      |
|                     | DBP                 | Neutral           | Neutral           | Neutral | Serious (-1)      | Not reported (-1) | Low      |
|                     | SBP                 | Neutral           | Serious (-1)      | Neutral | Serious (-1)      | Not reported (-1) | Very low |
|                     | Muscle strength     | Serious (-1)      | Neutral           | Neutral | Serious (-1)      | Not reported (-1) | Very low |
|                     | Walking capacity    | Neutral           | Neutral           | Neutral | Serious (-1)      | Not reported (-1) | Low      |
| Matsuzawa<br>(2017) | VO <sub>2peak</sub> | Neutral           | Neutral           | Neutral | Neutral           | Neutral           | High     |
|                     | 6MWT                | Serious (-1)      | Serious (-1)      | Neutral | Serious (-1)      | Neutral           | Very low |
|                     | Muscle strength     | Serious (-1)      | Neutral           | Neutral | Serious (-1)      | Serious (-1)      | Very low |
|                     | PCS                 | Very serious (-2) | Neutral           | Neutral | Serious (-1)      | Serious (-1)      | Very low |
|                     | MCS                 | Very serious (-2) | Neutral           | Neutral | Serious (-1)      | Serious (-1)      | Very low |
| Smart<br>(2011)     | VO <sub>2peak</sub> | Neutral           | Serious (-1)      | Neutral | Neutral           | Serious (-1)      | Low      |
| Bogataj             | 6MWT                | Serious (-1)      | Serious (-1)      | Neutral | Not reported (-1) | Not reported (-1) | Very low |

|                    |                           |                   |                   |         |                   |                   |          |
|--------------------|---------------------------|-------------------|-------------------|---------|-------------------|-------------------|----------|
| (2020)             | VO <sub>2peak</sub>       | Very serious (-2) | Serious (-1)      | Neutral | Not reported (-1) | Not reported (-1) | Very low |
|                    | STS 10                    | Neutral           | Serious (-1)      | Neutral | Not reported (-1) | Serious (-1)      | Very low |
| Sheng<br>(2014)    | Kt/V                      | Serious (-1)      | Neutral           | Neutral | Serious (-1)      | Serious (-1)      | Very low |
|                    | VO <sub>2peak</sub>       | Serious (-1)      | Neutral           | Neutral | Serious (-1)      | Serious (-1)      | Very low |
|                    | PCS                       | Serious (-1)      | Neutral           | Neutral | Serious (-1)      | Serious (-1)      | Very low |
|                    | MCS                       | Serious (-1)      | Neutral           | Neutral | Serious (-1)      | Serious (-1)      | Very low |
|                    | 6MWT                      | Serious (-1)      | Very serious (-2) | Neutral | Serious (-1)      | Serious (-1)      | Very low |
|                    | DBP                       | Serious (-1)      | Serious (-1)      | Neutral | Serious (-1)      | Serious (-1)      | Very low |
|                    | SBP                       | Serious (-1)      | Neutral           | Neutral | Serious (-1)      | Serious (-1)      | Very low |
|                    | STS60                     | Serious (-1)      | Neutral           | Neutral | Serious (-1)      | Serious (-1)      | Very low |
| Neto<br>(2018)     | VO <sub>2peak</sub>       | Serious (-1)      | Very serious (-2) | Neutral | Serious (-1)      | Not reported (-1) | Very low |
|                    | PCS                       | Serious (-1)      | Serious (-1)      | Neutral | Serious (-1)      | Serious (-1)      | Very low |
|                    | MCS                       | Serious (-1)      | Serious (-1)      | Neutral | Serious (-1)      | Serious (-1)      | Very low |
|                    | 6MWT                      | Serious (-1)      | Very serious (-2) | Neutral | Serious (-1)      | Serious (-1)      | Very low |
|                    | Muscle strength           | Neutral           | Serious (-1)      | Neutral | Serious (-1)      | Serious (-1)      | Very low |
| Ferrari<br>(2019)  | Kt/V (AE)                 | Neutral           | Serious (-1)      | Neutral | Serious (-1)      | Neutral           | Low      |
|                    | Kt/V (RT)                 | Serious (-1)      | Neutral           | Neutral | Serious (-1)      | Serious (-1)      | Very low |
|                    | VO <sub>2peak</sub> (COM) | Neutral           | Neutral           | Neutral | Serious (-1)      | Serious (-1)      | Low      |
|                    | VO <sub>2peak</sub> (AE)  | Serious (-1)      | Neutral           | Neutral | Serious (-1)      | Serious (-1)      | Very low |
|                    | 6MWT (RT)                 | Neutral           | Neutral           | Neutral | Serious (-1)      | Serious (-1)      | Low      |
|                    | 6MWT(AE)                  | Neutral           | Neutral           | Neutral | Serious (-1)      | Serious (-1)      | Low      |
|                    | SBP                       | Serious (-1)      | Neutral           | Neutral | Serious (-1)      | Neutral           | Low      |
|                    | DBP                       | Serious (-1)      | Neutral           | Neutral | Serious (-1)      | Neutral           | Low      |
| Wyngaert<br>(2018) | SBP                       | Serious (-1)      | Serious (-1)      | Neutral | Serious (-1)      | Serious (-1)      | Very low |
|                    | DBP                       | Serious (-1)      | Very serious (-2) | Neutral | Serious (-1)      | Serious (-1)      | Very low |

1  
2  
3  
4  
5  
6  
7  
8  
9  
10  
11  
12  
13  
14  
15  
16  
17  
18  
19  
20  
21  
22  
23  
24  
25  
26  
27  
28  
29  
30  
31  
32  
33  
34  
35  
36  
37  
38  
39  
40  
41  
42  
43  
44  
45  
46

|                  |                                      |                   |                   |         |              |                   |          |
|------------------|--------------------------------------|-------------------|-------------------|---------|--------------|-------------------|----------|
|                  | VO <sub>2peak</sub>                  | Serious (-1)      | Very serious (-2) | Neutral | Serious (-1) | Neutral           | Very low |
|                  | BMI                                  | Serious (-1)      | Neutral           | Neutral | Serious (-1) | Neutral           | Low      |
| Oguchi<br>(2018) | VO <sub>2peak</sub>                  | Neutral           | Neutral           | Neutral | Serious (-1) | Serious (-1)      | Low      |
|                  | HRQoL                                | Serious (-1)      | Serious (-1)      | Neutral | Serious (-1) | Serious (-1)      | Very low |
| Ju<br>(2020)     | HGS                                  | Very serious (-2) | Neutral           | Neutral | Serious (-1) | Neutral           | Very low |
|                  | Symptom/problem<br>(KDQoL)           | Very serious (-2) | Very serious (-2) | Neutral | Serious (-1) | Not reported (-1) | Very low |
|                  | effects of kidney<br>disease (KDQoL) | Very serious (-2) | Very serious (-2) | Neutral | Serious (-1) | Not reported (-1) | Very low |
|                  | burden of kidney<br>disease (KDQoL)  | Very serious (-2) | Very serious (-2) | Neutral | Serious (-1) | Not reported (-1) | Very low |

Abbreviation: AE = aerobic exercise; RT = resistance training; COM = combine; VO<sub>2peak</sub> = peak oxygen uptake; HRQoL = health-related quality of life; DBP = diastolic blood pressure; SBP = systolic blood pressure; PCS = physical component summary; MCS = mental component summary; 6MWT = 6 minutes walk test; STS 10 = sit to stand 10 test; STS 30 = sit to stand 30 test; STS 60 = sit to stand 60 test; TUGT = timed up and go test; BMI = body mass index; SMD = standardized mean difference; HD = hemodialysis; KTRs = kidney transplant recipients; SF-36 = short form-36; KDQoL = kidney disease quality of life;

Very serious mean the included studies existed two or more high risk of bias in terms of randomization, blinding, allocation concealment, completeness of result data, or selective reporting, or  $75\% \leq I^2 \leq 100\%$ .

Serious mean the included studies existed two or more high risk of bias in terms of randomization, blinding, allocation concealment, completeness of result data, or selective reporting, or  $50\% \leq I^2 < 75\%$ , or the included study sample size < 400, asymmetric funnel plot or less than 9 studies included.

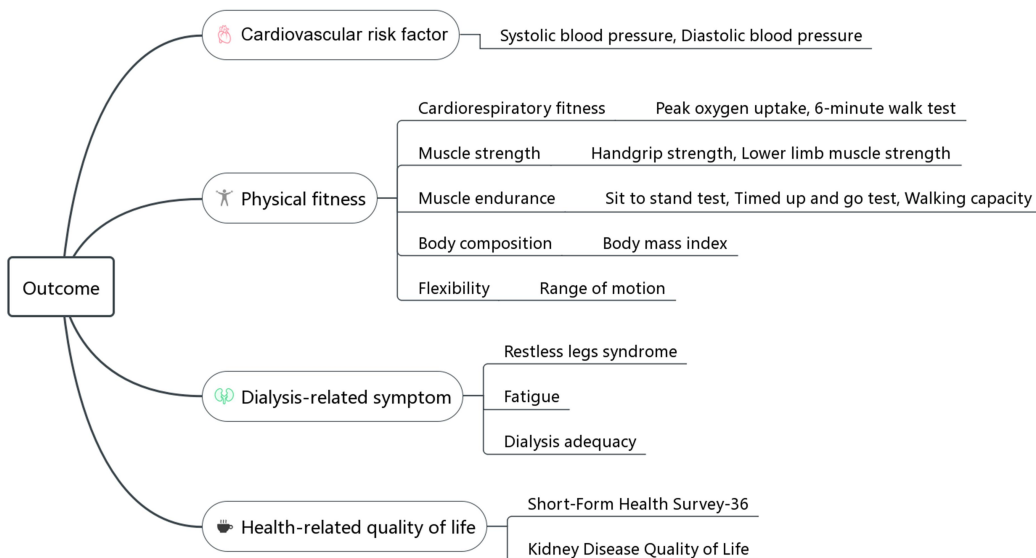

**Supplemental Figures S1**

peer review only

1  
2  
3  
4  
5  
6  
7  
8  
9  
10  
11  
12  
13  
14  
15  
16  
17  
18  
19  
20  
21  
22  
23  
24  
25  
26  
27  
28  
29  
30  
31  
32  
33  
34  
35  
36  
37  
38  
39  
40  
41  
42  
43  
44  
45  
46  
47  
48  
49  
50  
51  
52  
53  
54  
55  
56  
57  
58  
59  
60

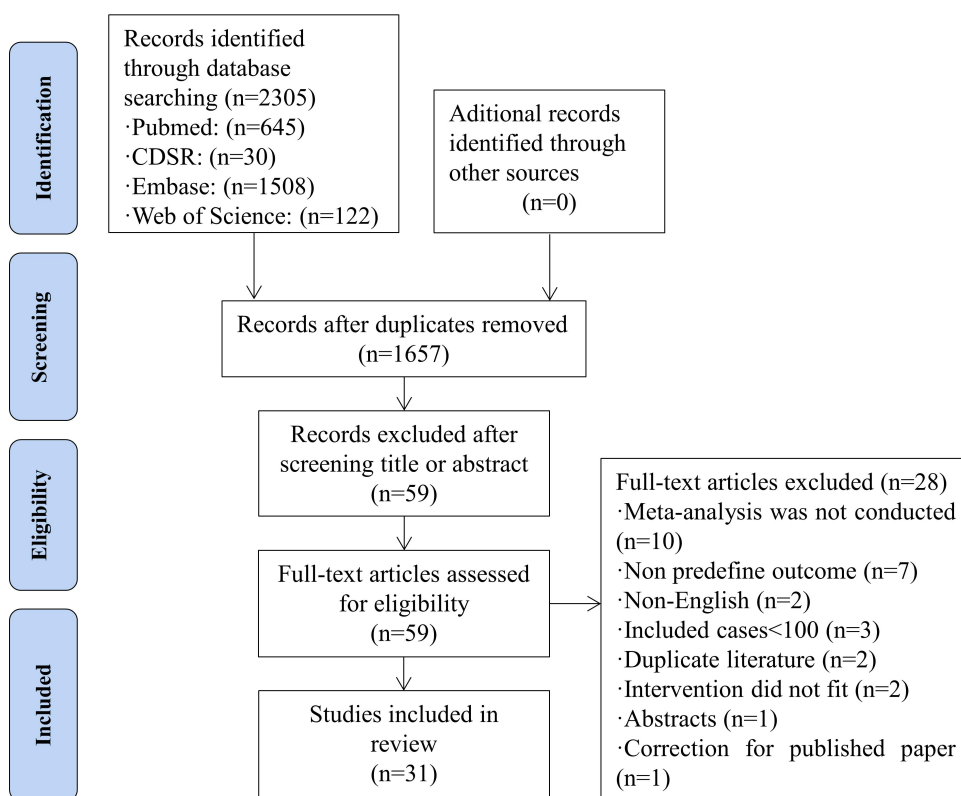

### Supplemental Figures S2

CDSR = Cochrane Database of Systemic Review

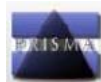

## PRISMA 2020 Checklist

| Section and Topic             | Item # | Checklist item                                                                                                                                                                                                                                                                                       | Location where item is reported |
|-------------------------------|--------|------------------------------------------------------------------------------------------------------------------------------------------------------------------------------------------------------------------------------------------------------------------------------------------------------|---------------------------------|
| <b>TITLE</b>                  |        |                                                                                                                                                                                                                                                                                                      |                                 |
| Title                         | 1      | Identify the report as a systematic review.                                                                                                                                                                                                                                                          | Page 1                          |
| <b>ABSTRACT</b>               |        |                                                                                                                                                                                                                                                                                                      |                                 |
| Abstract                      | 2      | See the PRISMA 2020 for Abstracts checklist.                                                                                                                                                                                                                                                         | Page 2                          |
| <b>INTRODUCTION</b>           |        |                                                                                                                                                                                                                                                                                                      |                                 |
| Rationale                     | 3      | Describe the rationale for the review in the context of existing knowledge.                                                                                                                                                                                                                          | Page 4                          |
| Objectives                    | 4      | Provide an explicit statement of the objective(s) or question(s) the review addresses.                                                                                                                                                                                                               | Page 4                          |
| <b>METHODS</b>                |        |                                                                                                                                                                                                                                                                                                      |                                 |
| Eligibility criteria          | 5      | Specify the inclusion and exclusion criteria for the review and how studies were grouped for the syntheses.                                                                                                                                                                                          | Page 4-5                        |
| Information sources           | 6      | Specify all databases, registers, websites, organisations, reference lists and other sources searched or consulted to identify studies. Specify the date when each source was last searched or consulted.                                                                                            |                                 |
| Search strategy               | 7      | Present the full search strategies for all databases, registers and websites, including any filters and limits used.                                                                                                                                                                                 | Page 4                          |
| Selection process             | 8      | Specify the methods used to decide whether a study met the inclusion criteria of the review, including how many reviewers screened each record and each report retrieved, whether they worked independently, and if applicable, details of automation tools used in the process.                     | Page 5                          |
| Data collection process       | 9      | Specify the methods used to collect data from reports, including how many reviewers collected data from each report, whether they worked independently, any processes for obtaining or confirming data from study investigators, and if applicable, details of automation tools used in the process. | Page 5                          |
| Data items                    | 10a    | List and define all outcomes for which data were sought. Specify whether all results that were compatible with each outcome domain in each study were sought (e.g. for all measures, time points, analyses), and if not, the methods used to decide which results to collect.                        | Page 4-5                        |
|                               | 10b    | List and define all other variables for which data were sought (e.g. participant and intervention characteristics, funding sources). Describe any assumptions made about any missing or unclear information.                                                                                         | Page 5                          |
| Study risk of bias assessment | 11     | Specify the methods used to assess risk of bias in the included studies, including details of the tool(s) used, how many reviewers assessed each study and whether they worked independently, and if applicable, details of automation tools used in the process.                                    | Page 5                          |
| Effect measures               | 12     | Specify for each outcome the effect measure(s) (e.g. risk ratio, mean difference) used in the synthesis or presentation of results.                                                                                                                                                                  | Page 5-6                        |
| Synthesis methods             | 13a    | Describe the processes used to decide which studies were eligible for each synthesis (e.g. tabulating the study intervention characteristics and comparing against the planned groups for each synthesis (item #5)).                                                                                 | Page 4-5                        |
|                               | 13b    | Describe any methods required to prepare the data for presentation or synthesis, such as handling of missing summary statistics, or data conversions.                                                                                                                                                | Page 5                          |
|                               | 13c    | Describe any methods used to tabulate or visually display results of individual studies and syntheses.                                                                                                                                                                                               | None                            |
|                               | 13d    | Describe any methods used to synthesize results and provide a rationale for the choice(s). If meta-analysis was performed, describe the model(s), method(s) to identify the presence and extent of statistical heterogeneity, and software package(s) used.                                          | Not applicable                  |
|                               | 13e    | Describe any methods used to explore possible causes of heterogeneity among study results (e.g. subgroup analysis, meta-regression).                                                                                                                                                                 | None                            |
|                               | 13f    | Describe any sensitivity analyses conducted to assess robustness of the synthesized results.                                                                                                                                                                                                         | None                            |
| Reporting bias assessment     | 14     | Describe any methods used to assess risk of bias due to missing results in a synthesis (arising from reporting biases).                                                                                                                                                                              | None                            |
| Certainty                     | 15     | Describe any methods used to assess certainty (or confidence) in the body of evidence for an outcome.                                                                                                                                                                                                | Page 6                          |



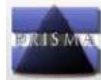

## PRISMA 2020 Checklist

| Section and Topic                              | Item # | Checklist item                                                                                                                                                                                                                                                                                                                                                                           | Location where item is reported |
|------------------------------------------------|--------|------------------------------------------------------------------------------------------------------------------------------------------------------------------------------------------------------------------------------------------------------------------------------------------------------------------------------------------------------------------------------------------|---------------------------------|
| assessment                                     |        |                                                                                                                                                                                                                                                                                                                                                                                          |                                 |
| <b>RESULTS</b>                                 |        |                                                                                                                                                                                                                                                                                                                                                                                          |                                 |
| Study selection                                | 16a    | Describe the results of the search and selection process, from the number of records identified in the search to the number of studies included in the review, ideally using a flow diagram.                                                                                                                                                                                             | Page 6                          |
|                                                | 16b    | Cite studies that might appear to meet the inclusion criteria, but which were excluded, and explain why they were excluded.                                                                                                                                                                                                                                                              | Page 6                          |
| Study characteristics                          | 17     | Cite each included study and present its characteristics.                                                                                                                                                                                                                                                                                                                                | Page 6                          |
| Risk of bias in studies                        | 18     | Present assessments of risk of bias for each included study.                                                                                                                                                                                                                                                                                                                             | Page 6                          |
| Results of individual studies                  | 19     | For all outcomes, present, for each study: (a) summary statistics for each group (where appropriate) and (b) an effect estimate and its precision (e.g. confidence/credible interval), ideally using structured tables or plots.                                                                                                                                                         | Page 18-32                      |
| Results of syntheses                           | 20a    | For each synthesis, briefly summarise the characteristics and risk of bias among contributing studies.                                                                                                                                                                                                                                                                                   | Not applicable                  |
|                                                | 20b    | Present results of all statistical syntheses conducted. If meta-analysis was done, present for each the summary estimate and its precision (e.g. confidence/credible interval) and measures of statistical heterogeneity. If comparing groups, describe the direction of the effect.                                                                                                     | Not applicable                  |
|                                                | 20c    | Present results of all investigations of possible causes of heterogeneity among study results.                                                                                                                                                                                                                                                                                           | Not applicable                  |
|                                                | 20d    | Present results of all sensitivity analyses conducted to assess the robustness of the synthesized results.                                                                                                                                                                                                                                                                               | None                            |
| Reporting biases                               | 21     | Present assessments of risk of bias due to missing results (arising from reporting biases) for each synthesis assessed.                                                                                                                                                                                                                                                                  | Page 6                          |
| Certainty of evidence                          | 22     | Present assessments of certainty (or confidence) in the body of evidence for each outcome assessed.                                                                                                                                                                                                                                                                                      | Page 6                          |
| <b>DISCUSSION</b>                              |        |                                                                                                                                                                                                                                                                                                                                                                                          |                                 |
| Discussion                                     | 23a    | Provide a general interpretation of the results in the context of other evidence.                                                                                                                                                                                                                                                                                                        | Page 10                         |
|                                                | 23b    | Discuss any limitations of the evidence included in the review.                                                                                                                                                                                                                                                                                                                          | Page 12                         |
|                                                | 23c    | Discuss any limitations of the review processes used.                                                                                                                                                                                                                                                                                                                                    | Page 12                         |
|                                                | 23d    | Discuss implications of the results for practice, policy, and future research.                                                                                                                                                                                                                                                                                                           | None                            |
| <b>OTHER INFORMATION</b>                       |        |                                                                                                                                                                                                                                                                                                                                                                                          |                                 |
| Registration and protocol                      | 24a    | Provide registration information for the review, including register name and registration number, or state that the review was not registered.                                                                                                                                                                                                                                           | Page 2                          |
|                                                | 24b    | Indicate where the review protocol can be accessed, or state that a protocol was not prepared.                                                                                                                                                                                                                                                                                           | Page 2                          |
|                                                | 24c    | Describe and explain any amendments to information provided at registration or in the protocol.                                                                                                                                                                                                                                                                                          | None                            |
| Support                                        | 25     | Describe sources of financial or non-financial support for the review, and the role of the funders or sponsors in the review.                                                                                                                                                                                                                                                            | Page 1                          |
| Competing interests                            | 26     | Declare any competing interests of review authors.                                                                                                                                                                                                                                                                                                                                       | Page 1                          |
| Availability of data, code and other materials | 27     | Report which of the following are publicly available and where they can be found: template data collection forms; data extracted from included studies; data used for all analyses; analytic code; any other materials used in the review.<br>For peer review only - <a href="http://bmjopen.bmj.com/site/about/guidelines.xhtml">http://bmjopen.bmj.com/site/about/guidelines.xhtml</a> | Page 1                          |

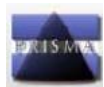

## PRISMA 2020 Checklist

1  
2  
3  
4  
5  
6  
7  
8  
9  
10  
11  
12  
13  
14  
15  
16  
17  
18  
19  
20  
21  
22  
23  
24  
25  
26  
27  
28  
29  
30  
31  
32  
33  
34  
35  
36  
37  
38  
39  
40  
41  
42  
43  
44  
45  
46  
47

From: Page MJ, McKenzie JE, Bossuyt PM, Boutron I, Hoffmann TC, Mulrow CD, et al. The PRISMA 2020 statement: an updated guideline for reporting systematic reviews. *BMJ* 2021;372:n71. doi: 10.1136/bmj.n71

For more information, visit: <http://www.prisma-statement.org/>

For peer review only

# BMJ Open

## Therapeutic effects of exercise interventions for patients with chronic kidney disease: an umbrella review of systematic reviews and meta-analyses

|                                 |                                                                                                                                                                                                                                                                                                                                                                                                                                                                                                                                |
|---------------------------------|--------------------------------------------------------------------------------------------------------------------------------------------------------------------------------------------------------------------------------------------------------------------------------------------------------------------------------------------------------------------------------------------------------------------------------------------------------------------------------------------------------------------------------|
| Journal:                        | <i>BMJ Open</i>                                                                                                                                                                                                                                                                                                                                                                                                                                                                                                                |
| Manuscript ID                   | bmjopen-2021-054887.R1                                                                                                                                                                                                                                                                                                                                                                                                                                                                                                         |
| Article Type:                   | Original research                                                                                                                                                                                                                                                                                                                                                                                                                                                                                                              |
| Date Submitted by the Author:   | 08-Mar-2022                                                                                                                                                                                                                                                                                                                                                                                                                                                                                                                    |
| Complete List of Authors:       | Zhang, Fan; Long Hua Hospital, Department of Nephrology<br>Bai, Yan; Shanghai University of Traditional Chinese Medicine, Longhua Clinical Medical College<br>Zhao, Xing; Shanghai University of Traditional Chinese Medicine, Longhua Clinical Medical College<br>Huang, Liuyan; Shanghai University of Traditional Chinese Medicine<br>Wang, Weiqiong; Long Hua Hospital, Blood Purification Centre<br>Zhou, Wenqin; Long Hua Hospital, Department of Nursing<br>Zhang, Huachun; Long Hua Hospital, Department of Nephrology |
| <b>Primary Subject Heading</b>: | Renal medicine                                                                                                                                                                                                                                                                                                                                                                                                                                                                                                                 |
| Secondary Subject Heading:      | Rehabilitation medicine, Evidence based practice                                                                                                                                                                                                                                                                                                                                                                                                                                                                               |
| Keywords:                       | Nephrology < INTERNAL MEDICINE, Rehabilitation medicine < INTERNAL MEDICINE, Chronic renal failure < NEPHROLOGY                                                                                                                                                                                                                                                                                                                                                                                                                |
|                                 |                                                                                                                                                                                                                                                                                                                                                                                                                                                                                                                                |

SCHOLARONE™  
Manuscripts

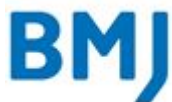

I, the Submitting Author has the right to grant and does grant on behalf of all authors of the Work (as defined in the below author licence), an exclusive licence and/or a non-exclusive licence for contributions from authors who are: i) UK Crown employees; ii) where BMJ has agreed a CC-BY licence shall apply, and/or iii) in accordance with the terms applicable for US Federal Government officers or employees acting as part of their official duties; on a worldwide, perpetual, irrevocable, royalty-free basis to BMJ Publishing Group Ltd ("BMJ") its licensees and where the relevant Journal is co-owned by BMJ to the co-owners of the Journal, to publish the Work in this journal and any other BMJ products and to exploit all rights, as set out in our [licence](#).

The Submitting Author accepts and understands that any supply made under these terms is made by BMJ to the Submitting Author unless you are acting as an employee on behalf of your employer or a postgraduate student of an affiliated institution which is paying any applicable article publishing charge ("APC") for Open Access articles. Where the Submitting Author wishes to make the Work available on an Open Access basis (and intends to pay the relevant APC), the terms of reuse of such Open Access shall be governed by a Creative Commons licence – details of these licences and which [Creative Commons](#) licence will apply to this Work are set out in our licence referred to above.

Other than as permitted in any relevant BMJ Author's Self Archiving Policies, I confirm this Work has not been accepted for publication elsewhere, is not being considered for publication elsewhere and does not duplicate material already published. I confirm all authors consent to publication of this Work and authorise the granting of this licence.

1  
2  
3 **Therapeutic effects of exercise interventions for patients with chronic kidney disease: an**  
4 **umbrella review of systematic reviews and meta-analyses**  
5  
6

7 Title page  
8

9 Fan Zhang<sup>1</sup>, Yan Bai<sup>2</sup>, Xing Zhao<sup>2</sup>, Liuyan Huang<sup>1</sup>, Weiqiong Wang<sup>3</sup>, Wenqin Zhou<sup>4</sup>, Huachun  
10 Zhang<sup>4</sup>  
11  
12

13 1 Department of Nephrology, Longhua Hospital Shanghai University of Traditional Chinese  
14 Medicine, ShangHai, 200032, China.  
15

16  
17 2 Longhua Clinical Medical College, Shanghai University of Traditional Chinese Medicine, Shang  
18 Hai, 200032, China.  
19

20  
21 3 Blood Purification Centre, Longhua Hospital Shanghai University of Traditional Chinese  
22 Medicine, ShangHai, 200032, China.  
23

24 4 Department of Nursing, Longhua Hospital Shanghai University of Traditional Chinese Medicine,  
25 ShangHai, 200032, China.  
26

27  
28 **Key words:** Exercise, chronic kidney disease, systematic review, meta-analyses  
29

30 **Running Head:** Exercise for chronic kidney disease  
31

32 **First author**  
33

34 Fan Zhang, Department of Nephrology, No. 725, Wan Ping Nan Road, Xuhui District, Shanghai,  
35 200032, P.R. China E-mail: [fan\\_zhang1993@163.com](mailto:fan_zhang1993@163.com)  
36  
37

38 **Corresponding author**  
39

40 Huachun Zhang, Department of Nursing, No. 725, Wan Ping Nan Road, Xuhui District, Shanghai,  
41 200032, P.R. China, E-mail: [lhlky@163.com](mailto:lhlky@163.com)  
42  
43  
44  
45  
46  
47  
48  
49  
50  
51  
52  
53  
54  
55  
56  
57  
58  
59  
60

## ABSTRACT

**Objective** To conduct an overview of meta-analyses evaluating the impact of exercise interventions for improving health outcomes in patients with chronic kidney disease (CKD).

**Design** An umbrella review of systematic review and meta-analyses of intervention trials was performed.

**Data sources** PubMed, Web of Science, Embase, and the Cochrane Database of Systematic Reviews were searched from inception to March 9th, 2021 for relevant articles.

**Eligibility criteria for selecting studies** Eligible meta-analyses compared the effects of usual care with and without exercise in CKD patients. Health outcomes included those related to cardiovascular risk factors, physical fitness, dialysis-related symptoms, dialysis adequacy, and health-related quality of life. Systematic reviews and meta-analyses that included fewer than three RCTs or fewer than 100 participants were excluded from the analysis.

**Results** A total of 31 eligible systematic reviews and meta-analyses were included that assessed 120 outcomes. For physical fitness, there was a moderate effect size for cardiorespiratory fitness, muscle strength, and body composition and a small effect size for muscle endurance. The effect sizes for cardiovascular risk factors, dialysis-related symptoms, and health-related quality of life outcomes were small. According to the Grading of Recommendations Assessment, Development, and Evaluation framework, most outcomes were scored as low or very low quality.

**Conclusion** Exercise appears to be a safe way to affect concomitant cardiovascular risk factors, such as blood pressure, improve physical fitness and health-related quality of life, and reduce dialysis-related symptoms in CKD patients.

**Keywords:** Exercise, Chronic Kidney Disease, Systematic Review, Meta-Analyses

**PROSPERO registration number** CRD42020223591.

**Strengths and limitations of this study**

- 1) This overview provides a comprehensive summary of the therapeutic effects of exercise interventions for patients with chronic kidney disease.
- 2) Methodological quality of the included reviews was assessed using standardized measures.
- 3) The limitation of this overview is that language bias may exist in this review because the search strategy was limited to English.
- 4) Most studies are based on hemodialysis-dependent chronic kidney disease.

## INTRODUCTION

Chronic kidney disease (CKD) is a long-term condition characterized by the gradual loss of renal function over time.[1] In the past 30 years, the mortality attributed to CKD increased by 41.5%, a percentage rate that exceeds several cancers and cardiovascular diseases.[2] With the increasing incidence of hypertension, diabetes, and obesity, this number will continue to rise.[3, 4] CKD patients experience a high symptom burden with progressively impaired physical performance, leading to decreased kidney function, lower health-related quality of life (HRQOL), increased risk of cardiovascular events, and increased all-cause mortality.[5, 6]

With an increasing number of patients with CKD living longer, the effectiveness and accessibility of their health services have never been more critical. Renal rehabilitation is a multifaceted intervention program. Rehabilitation consists of exercise interventions, diet control, fluid management, and psychological support to alleviate physical/mental deficiencies caused by kidney disease and renal replacement therapy to improve disease prognosis and prolong life expectancy.[7] Since exercise is the core of renal rehabilitation, there is an increasing number of systematic reviews and meta-analyses investigating the influence of exercise on health outcomes in CKD patients.[8]

Data from large cohort studies show that mortality risk was lower for regular (equal to or more than once/week) versus non-regular (less than once/week) exercisers [adjusted hazard ratio (HR)=0.73, 95% confidence interval (CI): 0.69–0.78], and mortality risk tended to decrease as exercise frequency increased (HR for participants who exercised once/week = 0.82, 95% CI: 0.73–0.91; HR for those who exercised 6–7 times/week = 0.69, 95% CI: 0.63–0.76) and patients who exercised daily had lower mortality risk (HR = 0.84, 95% CI: 0.74–0.96) than patients exercising once/week.[9] Based on data from 41 randomized controlled trials (RCT), Heiwe et al. reported effective improvements in aerobic capacity, muscular function, and walking capacity in CKD patients after exercise, [10] indicators that are the core of frailty. [11] In other words, exercise is an essential non-pharmacological strategy to improve frailty symptoms in CKD patients, the latter being a significant cause of sedentary behavior in such population. [12] Because of this, some researchers and guidelines recommend that healthcare providers prescribe exercise for CKD patients.[13-16] However, the results of meta-analyses of exercise in CKD patients are inconsistent.

This umbrella review aims to assess the therapeutic effects of exercise regarding cardiovascular risk factors, physical fitness, dialysis-related symptoms, dialysis adequacy, and HRQOL in CKD patients summarized in systematic reviews and meta-analyses.

## METHODS AND ANALYSIS

This umbrella review follows the Preferred Reporting Items for Systematic Reviews and Meta-Analyses (PRISMA) guidelines.[17] The review was prospectively registered (PROSPERO: CRD42020223591), and the protocol for this review was published.[18]



## Patient and public involvement

Patients and the public were not involved in the design, conduct, reporting, or dissemination plans of this research.

## Literature Search

A comprehensive search strategy was performed to identify systematic reviews and meta-analyses of CKD patients that compared usual care procedures with and without exercise interventions. PubMed, Embase, the Cochrane Database of Systematic Reviews (CDSR), and the Web of Science were searched for systematic reviews and meta-analyses from inception to March 9th, 2021. The detailed search strategy is summarized in **Supplementary Table S1**. The references of existing systematic reviews were also screened. Any reviews considered potentially relevant by authors were retrieved for further consideration.

## Eligibility Criteria

Eligible systematic reviews and meta-analyses included those 1) where patients were diagnosed with CKD at various stages of treatment; 2) that compared exercise interventions with sham/no exercise or usual/standard care; 3) that reported outcomes on at least one of the following: cardiovascular risk factors (blood pressure), physical fitness, dialysis-related symptoms, dialysis adequacy, and HRQOL. The methods to assess each outcome were shown in **Supplement Figure S1**; 4) systematic reviews with meta-analysis of intervention trials (RCTs and quasi-experimental studies). A meta-analysis that included less than three studies or less than 100 participants was excluded. For duplicate literature, the article with the most comprehensive data was selected. The language was restricted to English. Letters to the editor, trial protocols, and conference abstracts were excluded.

## Study selection

Two independent authors screened all titles and abstracts compiled from the search results. Each paper was examined for appropriate eligibility criteria, and a third author resolved disagreements.

## Data extraction

Requisite data were extracted independently by two independent authors into a standardized format that included: 1) author, 2) publication year, 3) stage of CKD, 4) the number of included studies and participants, 5) exercise type, 6) exercise mode (intradialytic or interdialytic), 7) standardized mean difference (SMD) or mean difference (MD) with corresponding 95% CI for each outcome, 8) *P*-values, 9) *I*<sup>2</sup> values, and 10) exercise-related adverse events.

## Risk of bias assessment

1  
2  
3 A Measurement Tool to Assess Systematic Reviews-2 (AMSTAR-2) was used to assess the risk of  
4 bias among the included systematic reviews.[19] This checklist contains 16 items, and each item  
5 was answered with a “yes” (1 point), “partial yes” (0.5 points), or “no” (0 points). A percentage  
6 score was calculated for each study based on the total score as the numerator and the maximum 16  
7 points as the denominator. A meta-analysis scoring  $\geq 80\%$  was classified as high quality, those  
8 scoring 40-79% as medium quality, and those scoring  $< 40\%$  as low quality.[20] Two authors  
9 performed the risk of bias assessment independently, and discussions resolved the disagreement.

### 14 Data analysis

15  
16  
17 The summary effect size from each meta-analysis was analyzed qualitatively based on the SMD and  
18 its 95% CI for each outcome. If they were not presented as SMD in the original meta-analysis,  
19 Review Manager V.5.3 was used to convert SMD outcomes. If data could not be converted into  
20 SMD, we contacted the authors of the meta-analysis for the data. Effects were considered small  
21 (SMD  $< 0.50$ ), moderate (SMD from 0.50 to 0.79), and large (SMD  $\geq 0.80$ ).[21]  $I^2$  values were  
22 interpreted as follows:  $\leq 25\%$  indicate low heterogeneity,  $25\% < I^2 \leq 50\%$  indicate mild heterogeneity,  
23  $50\% < I^2 \leq 75\%$  indicate moderate heterogeneity and  $> 75\%$  indicate high heterogeneity.[22]

24  
25  
26  
27  
28 The level of evidence for each meta-analysis was evaluated using the Grading of Recommendations  
29 Assessment, Development, and Evaluation (GRADE) system.[23] The quality of evidence was  
30 assessed using five domains: risk of bias, inconsistency, indirectness, imprecision, and publication  
31 bias. Beginning with an initial score of 4 points, the score for each of these five domains was reduced  
32 accordingly: “not reported (-1)”, “serious (-1)”, “very serious (-2)”, or “neutral (0)”. Studies were  
33 rated as high (4 points), moderate (3 points), low (2 points), or very low ( $\leq 1$  point) using the  
34 GRADE system. The GRADE assessment was conducted independently by two authors. Any  
35 differences were resolved by discussion or adjudication by a third author. The incidence of adverse  
36 events was based on the number of reported divided by the patients in the exercise group.

## 41 RESULTS

### 42 Characteristics of the meta-analyses

43  
44  
45  
46 The search identified 2305 potential articles, of which 648 were duplicates. After reading the title  
47 and abstract, 1598 papers were excluded, and 28 were excluded after full-text review resulting in  
48 31 final studies. [10, 24-53] The PRISMA flowchart of study inclusion is illustrated in **Figure 1**.  
49 The reasons for excluded articles are listed in **Supplementary Table S2**.

50  
51  
52  
53 The 31 included systematic reviews and meta-analyses were published from September 2011  
54 through March 2021. The number of included studies assessed in the articles ranged from 3 to 24,  
55 with a mean of 8 studies. The study sample sizes ranged from 106 to 874 participants, with a mean  
56 of 304. The characteristics of the included meta-analyses are shown in **Supplement Table S3**. SMD  
57 data from four papers could not be obtained from the authors, and the data of their effect size was  
58 presented as MD.[29, 30, 40, 46]

1  
2  
3 The methodological quality assessment of the included meta-analyses was determined, and the  
4 AMSTAR-2 scores ranged from 34.4% to 100.0%, with a mean score of 68.0%. Seven (22.6%)  
5 systematic reviews were rated of high quality, while 23 (74.2%) were rated of medium quality, and  
6 just one (0.3%) was rated as low quality (**Supplement Table S4**).  
7  
8  
9

10 Of the GRADE evidence quality of the 120 outcomes, 1.7% (2/120) reported evidence of high  
11 quality, 17.5% (21/120) reported evidence of moderate quality, 20.0% (24/120) reported evidence  
12 of low quality, and 60.8% (73/120) reported evidence of very low quality (**Supplement Table S5**).  
13  
14

### 15 **Blood pressure**

16  
17 There were 25 meta-analyses (reported in 13 articles) investigating the effect of exercise on  
18 cardiovascular risk factors (systolic and diastolic blood pressure) in CKD patients. [10, 27, 30, 33,  
19 34, 40, 41, 43, 46-49, 52] Of which, the number of studies ranged from 3 to 12 with a mean of 314  
20 participants (range from 198 to 514) were included in each meta-analysis (**Table 1**).  
21  
22  
23

24 The effect of exercise on systolic blood pressure was investigated in 13 meta-analyses with a mild  
25 heterogeneity (average  $I^2 = 36.1\%$ ), [10, 27, 30, 33, 34, 40, 41, 43, 46-49, 52] and six reported a  
26 positive statistically significant outcome. [30, 33, 41, 43, 49, 52] Of the 13 meta-analyses, nine  
27 reported a small effect size, [10, 27, 33, 34, 41, 43, 47, 48, 52] and one reported moderate. [49]  
28 GRADE assessment of quality indicated the overall evidence as being very low (10 meta-  
29 analyses [10, 27, 30, 33, 41, 43, 46-49]), low (two meta-analyses [34, 40]), and moderate (one meta-  
30 analysis [52]).  
31  
32  
33  
34

35 The effect of exercise on diastolic blood pressure was investigated in 12 meta-analyses with a mild  
36 heterogeneity (average  $I^2 = 49.1\%$ ), [10, 27, 30, 33, 34, 40, 41, 43, 46-48, 52] and 2 reported a positive  
37 statistically significant outcome. [41, 43] Of the 12 meta-analyses, nine reported small effect sizes  
38 [10, 27, 33, 34, 41, 43, 47, 48, 52], and all were graded as low or very low quality of evidence.  
39  
40  
41  
42

### 43 **Cardiorespiratory fitness**

44  
45 There were 34 meta-analyses (reported in 21 articles) that investigated the effects of exercise on  
46 cardiorespiratory fitness in CKD patients using a peak oxygen uptake (18 of 34), 6-minute walk test  
47 (14 of 34), or aerobic capacity (2 of 34). The meta-analyses included a mean of nine studies (ranging  
48 from 5 to 20) and a mean of 330 participants (ranging from 179 to 504) (**Table 2**).  
49  
50  
51

52 The effect of exercise on peak oxygen consumption was investigated in 18 meta-analyses (reported  
53 in 17 articles) with a mild heterogeneity (average  $I^2 = 42.2\%$ ), [24, 25, 27, 28, 30, 32, 34, 37, 38, 40,  
54 41, 43, 44, 49, 50, 54] and 16 reported positive statistically significant outcomes. [24, 25, 28, 30,  
55 32, 34, 37, 38, 40, 41, 43, 44, 47, 49, 50] Of the 18 meta-analyses, three reported a low effect size, [27,  
56 39, 50] nine reported a moderate effect size [25, 28, 32, 34, 37, 41, 43, 44, 49] and three reported a  
57 large effect size. [24, 38, 47] GRADE assessment of quality indicated the overall evidence as being  
58  
59  
60

1  
2  
3  
4 very low (9 meta-analyses[25, 27, 28, 30, 32, 37, 43, 47, 49]), low (8 meta-analyses[24, 34, 38-41,  
5 44, 50]), and high (one meta-analysis[37]). A meta-analysis that included kidney transplant  
6 recipients found no statistically significant difference in the SMD of the exercise group (0.38; 95%  
7 CI, -0.06 to 0.82;  $P=0.09$ ).[39]  
8  
9

10 The effect of exercise on 6-minute walk test was investigated in 14 meta-analyses (reported in 13  
11 articles) with a mild heterogeneity (average  $I^2=44.9\%$ ),[25, 28-30, 32, 34, 36-38, 40, 41, 43, 51] and  
12 13 reported positive statistically significant outcomes.[25, 28-30, 32, 34, 36-38, 41, 43, 51] Of the  
13 14 meta-analyses, two reported a small effect size,[25, 28] five reported a moderate effect size,[36,  
14 37, 41, 43, 51] and three reported a large effect size.[32, 34, 38] GRADE assessment of quality  
15 indicated the overall evidence as being very low (eight meta-analyses[25, 30, 32, 34, 38, 40, 43]),  
16 low (four meta-analyses[28, 37, 41, 51]), and moderate (two meta-analyses[29, 36]). In addition,  
17 the meta-analysis by Heiwe et al. (2014) showed that regular exercise had significant beneficial  
18 effects on aerobic capacity. [10, 33]  
19  
20  
21  
22

### 23 **Muscle strength**

24  
25  
26 Ten meta-analyses (reported in nine articles) investigated the effects of exercise on muscle strength  
27 in CKD patients with a low heterogeneity (average  $I^2=19.1\%$ ).[10, 26, 32, 33, 35-38, 51] The meta-  
28 analyses included a mean of seven studies (ranging from 3 to 12) and a mean of 252 participants  
29 (ranging from 115 to 385) (**Table 3**).  
30  
31

32  
33 Muscle strength was measured using handgrip strength and lower limb muscle strength. For patients  
34 in 8 of 10 meta-analyses, exercise resulted in statistically significant improvements in muscle  
35 strength. [10, 32, 33, 35-37, 51] Of the 10 meta-analyses, three reported a small effect size,[36, 38,  
36 51] five reported a moderate effect size,[10, 32, 33, 35, 36] and two reported a large effect size,[26,  
37 37] GRADE assessment of quality indicated the overall evidence as being very low (six meta-  
38 analyses[10, 32, 33, 35, 37, 38]) and low (four meta-analyses[26, 36, 51]).  
39  
40  
41

### 42 **Muscle endurance**

43  
44 Nine meta-analyses (reported in 8 articles) investigated the effects of exercise on muscle endurance  
45 with a mild heterogeneity (average  $I^2=29.4\%$ ).[10, 25, 33, 36, 38, 40, 43, 51] A mean of five studies  
46 (ranging from 3 to 7) and a mean of 238 participants (ranging from 106 to 461) were included in  
47 meta-analyses (**Table 4**).  
48  
49

50  
51 Muscle endurance was measured using a sit-to-stand test, timed up and go test, and walking capacity  
52 exercise. Pooled effect estimates from all nine meta-analyses suggested a beneficial effect of  
53 exercise on muscle endurance in CKD patients. Seven of the nine meta-analyses reported power to  
54 detect a statistically significant effect. [25, 33, 36, 38, 43, 51] Two meta-analyses reported moderate  
55 effect size, and 5 reported small effect size. GRADE assessment of quality indicated the overall  
56 evidence as being very low (seven meta-analyses[25, 33, 36, 38, 40, 43, 51]), low (one meta-  
57 analyses[36]) and moderate (one meta-analyses[10]).  
58  
59  
60

### Body composition

Four meta-analyses consisting of a mean of 9 studies (ranging from 4 to 13) and a mean of 335 participants (ranging from 166 to 466) included body mass index as an outcome.[27, 47, 49, 52] There was a low heterogeneity (average  $I^2=12.0\%$ ) among the study outcomes (**Table 5**).

Of the four meta-analyses, three showed a positive statistically significant impact on body mass index using exercise interventions in CKD patients.[47, 49, 52] Small effect size was reported in all meta-analyses. GRADE assessment of quality indicated the overall evidence as being very low (one meta-analysis), low (two meta-analyses[47, 49]), and moderate (one meta-analysis [52]).

### Dialysis-related symptoms

Nine meta-analyses (reported in seven articles) investigated the effect of exercise on dialysis-related symptoms in CKD patients.[30, 31, 34, 41, 43, 45, 53] Each meta-analysis included a mean of seven studies (ranging from 3 to 12 studies) and a mean of 239 participants (ranging from 139 to 370). (**Table 6**).

Fatigue was measured using the Rhoten Fatigue Scale, Visual Analogue Scale, and Hemodialysis Patients Fatigue Scale. The effect of exercise on fatigue was investigated in 2 meta-analyses with a low heterogeneity (average  $I^2=23.5\%$ ).[45, 53] The two meta-analyses revealed a statistically significant effect of exercise on fatigue. Although the meta-analyses reported a large effect size, the quality of evidence was low[45] or very low[53] according to GRADE criteria.

Just one meta-analysis investigated the effects of exercise on restless legs syndrome in CKD patients.[45] The results showed that pooled effect estimated for restless legs syndrome with statistically significant but considerable average heterogeneity ( $I^2=87.0\%$ ). According to GRADE criteria, the overall evidence for this outcome was rated as very low.

### Dialysis adequacy

Dialysis adequacy was measured using the value of Kt/V. Six meta-analyses (reported in 5 articles) investigated the effects of exercise on Kt/V in CKD patients with a mild heterogeneity (average  $I^2=25.7\%$ ).[30, 31, 34, 41, 43] Comprehensive effect estimates from all the six meta-analyses with Kt/V outcomes showed that exercise had a beneficial effect. Of the six meta-analyses, 3 reported a small effect size[34, 41, 43], and one reported large effect size.[31] According to GRADE criteria, all meta-analyses were rated as very low quality of evidence (**Table 6**).

### Health-related quality of life

Twenty-nine meta-analyses (reported in 13 articles) investigated the effect of exercise on HRQOL in CKD patients.[26, 28, 32, 34, 35, 37, 39-43, 51, 53] Among them, nine the meta-analyses each assessed physical and mental subscale of the Short-Form Health Survey-36.[28, 32, 34, 37, 41-43, 51, 53] A mean of six studies (ranging from 3 to 10) and a mean of 311 participants (ranging from

1  
2  
3  
4  
5  
6  
7  
8  
9  
10  
11  
12  
13  
14  
15  
16  
17  
18  
19  
20  
21  
22  
23  
24  
25  
26  
27  
28  
29  
30  
31  
32  
33  
34  
35  
36  
37  
38  
39  
40  
41  
42  
43  
44  
45  
46  
47  
48  
49  
50  
51  
52  
53  
54  
55  
56  
57  
58  
59  
60

167 to 562) were included in each meta-analysis. The included meta-analyses had moderate heterogeneity (average  $I^2=51.0\%$ ) (Table 7).

Of the 29 meta-analyses, a comprehensive effect estimate of the 28 meta-analyses shows that exercise is beneficial to the HRQOL of CKD patients, but only 12 of 29 meta-analyses reported a statistically significant outcome.[28, 34, 37, 39, 41-43, 53] There were 13 of 29 meta-analyses reporting a small effect size, [28, 32, 34, 37, 41, 43, 51, 53] 4 were moderate,[32, 37, 39, 41] and 6 were large.[26, 35, 42] According to GRADE criteria, the overall of evidence for HRQOL was rated as very low (20 meta-analyses[32, 35, 37, 39-43, 53]) or low (nine meta-analyses[26, 28, 34, 41, 51, 53]).

### Adverse events

Six meta-analyses reported exercise-related adverse events.[26, 28, 38, 41, 43, 44] Of the adverse effects, the most commonly reported were hypotension and cramping. Overall, the incidence of adverse events was approximately 0.3%.

## DISCUSSION

### Summary of main results

Several meta-analyses have been published in exercise interventions in CKD patients.[55] The findings of these meta-analyses should be assessed to determine if the evidence is consistent among the studies. This umbrella review included 31 eligible articles involving 120 separate meta-analyses investigating the effect of exercise on the health outcomes in CKD patients. There was low- or very low-quality evidence for moderate beneficial effects of exercise on cardiorespiratory fitness, muscle strength, and body composition. In addition, there was very low-quality evidence for minor beneficial effects of exercise on muscle endurance, cardiovascular risk factors, dialysis-related symptoms, and HRQOL. There were few adverse events related to exercise, indicating that exercise is safe for CKD patients.

### Interpretation of study effects

Cardiovascular disease is a frequent complication of CKD and is the leading cause of death in CKD patients.[56] Hypertension is an important modifiable risk factor for cardiovascular diseases and progressive renal dysfunction in CKD patients.[57] The present overview showed that exercise has a small to moderate effect on blood pressure (SMD: -0.75 to 0.04 for systolic blood pressure, and SMD: -0.47 to 0.04 for diastolic blood pressure), it is an appealing strategy for blood pressure control in CKD patients. However, the dose effects of exercise in the context of the cardiovascular health of CKD patients should be considered. A recent cohort study found that 7.5-15 metabolic equivalent hours per week (MET-h/week) was associated with the lowest risk of cardiovascular events.[58] Regrettably, the benefit of exercise on cardiovascular risk factors cannot be determined

1  
2  
3 because there are an insufficient number of conclusive studies that assess exercise effects on overall  
4 cardiovascular health. In a systematic review by Heiwe et al., a meta-analysis including two trials  
5 found that exercise improved cardiovascular function in patients with CKD, as reflected in the  
6 standard deviation of all normal RR intervals and left ventricular mass index.[10] Furthermore, a  
7 recent randomized controlled trial published by Graham-Brown indicated that intradialytic exercise  
8 could reduce left ventricular mass and is safe, deliverable, and well-tolerated.[59] Although  
9 the GRADE evidence generated was low, exercise should be recommended for CKD patients,  
10 particularly those comorbid with cardiovascular disease. Future randomized controlled exercise  
11 trials need to focus more on the role of exercise in cardiovascular events in patients with CKD.  
12  
13

14  
15  
16  
17  
18 Physical fitness is necessary for participation in activities of daily living. The exercise provided the  
19 best results in improving cardiorespiratory fitness and muscle strength in CKD patients, with more  
20 than a half of the meta-analyses reporting moderate or large effect sizes, regardless of the quality of  
21 evidence. Cardiorespiratory fitness is considered an important independent predictor of mortality,  
22 and muscle strength is an important indicator of physical performance in CKD patients.[60] It is  
23 well known that aerobic exercise is the “gold standard” for cardiorespiratory rehabilitation[61] and  
24 resistance training for muscle strength improvement.[62] However, a combination of aerobic and  
25 resistance exercises may have a more profound effect in CKD patients based on the current review.  
26  
27  
28  
29  
30  
31  
32  
33  
34  
35  
36  
37  
38  
39  
40  
41  
42  
43  
44  
45  
46  
47  
48  
49  
50  
51  
52  
53  
54  
55  
56  
57  
58  
59  
60  
61  
62  
63  
64  
65  
66  
67  
68  
69  
70  
71  
72  
73  
74  
75  
76  
77  
78  
79  
80  
81  
82  
83  
84  
85  
86  
87  
88  
89  
90  
91  
92  
93  
94  
95  
96  
97  
98  
99  
100  
101  
102  
103  
104  
105  
106  
107  
108  
109  
110  
111  
112  
113  
114  
115  
116  
117  
118  
119  
120  
121  
122  
123  
124  
125  
126  
127  
128  
129  
130  
131  
132  
133  
134  
135  
136  
137  
138  
139  
140  
141  
142  
143  
144  
145  
146  
147  
148  
149  
150  
151  
152  
153  
154  
155  
156  
157  
158  
159  
160  
161  
162  
163  
164  
165  
166  
167  
168  
169  
170  
171  
172  
173  
174  
175  
176  
177  
178  
179  
180  
181  
182  
183  
184  
185  
186  
187  
188  
189  
190  
191  
192  
193  
194  
195  
196  
197  
198  
199  
200  
201  
202  
203  
204  
205  
206  
207  
208  
209  
210  
211  
212  
213  
214  
215  
216  
217  
218  
219  
220  
221  
222  
223  
224  
225  
226  
227  
228  
229  
230  
231  
232  
233  
234  
235  
236  
237  
238  
239  
240  
241  
242  
243  
244  
245  
246  
247  
248  
249  
250  
251  
252  
253  
254  
255  
256  
257  
258  
259  
260  
261  
262  
263  
264  
265  
266  
267  
268  
269  
270  
271  
272  
273  
274  
275  
276  
277  
278  
279  
280  
281  
282  
283  
284  
285  
286  
287  
288  
289  
290  
291  
292  
293  
294  
295  
296  
297  
298  
299  
300  
301  
302  
303  
304  
305  
306  
307  
308  
309  
310  
311  
312  
313  
314  
315  
316  
317  
318  
319  
320  
321  
322  
323  
324  
325  
326  
327  
328  
329  
330  
331  
332  
333  
334  
335  
336  
337  
338  
339  
340  
341  
342  
343  
344  
345  
346  
347  
348  
349  
350  
351  
352  
353  
354  
355  
356  
357  
358  
359  
360  
361  
362  
363  
364  
365  
366  
367  
368  
369  
370  
371  
372  
373  
374  
375  
376  
377  
378  
379  
380  
381  
382  
383  
384  
385  
386  
387  
388  
389  
390  
391  
392  
393  
394  
395  
396  
397  
398  
399  
400  
401  
402  
403  
404  
405  
406  
407  
408  
409  
410  
411  
412  
413  
414  
415  
416  
417  
418  
419  
420  
421  
422  
423  
424  
425  
426  
427  
428  
429  
430  
431  
432  
433  
434  
435  
436  
437  
438  
439  
440  
441  
442  
443  
444  
445  
446  
447  
448  
449  
450  
451  
452  
453  
454  
455  
456  
457  
458  
459  
460  
461  
462  
463  
464  
465  
466  
467  
468  
469  
470  
471  
472  
473  
474  
475  
476  
477  
478  
479  
480  
481  
482  
483  
484  
485  
486  
487  
488  
489  
490  
491  
492  
493  
494  
495  
496  
497  
498  
499  
500  
501  
502  
503  
504  
505  
506  
507  
508  
509  
510  
511  
512  
513  
514  
515  
516  
517  
518  
519  
520  
521  
522  
523  
524  
525  
526  
527  
528  
529  
530  
531  
532  
533  
534  
535  
536  
537  
538  
539  
540  
541  
542  
543  
544  
545  
546  
547  
548  
549  
550  
551  
552  
553  
554  
555  
556  
557  
558  
559  
560  
561  
562  
563  
564  
565  
566  
567  
568  
569  
570  
571  
572  
573  
574  
575  
576  
577  
578  
579  
580  
581  
582  
583  
584  
585  
586  
587  
588  
589  
590  
591  
592  
593  
594  
595  
596  
597  
598  
599  
600  
601  
602  
603  
604  
605  
606  
607  
608  
609  
610  
611  
612  
613  
614  
615  
616  
617  
618  
619  
620  
621  
622  
623  
624  
625  
626  
627  
628  
629  
630  
631  
632  
633  
634  
635  
636  
637  
638  
639  
640  
641  
642  
643  
644  
645  
646  
647  
648  
649  
650  
651  
652  
653  
654  
655  
656  
657  
658  
659  
660  
661  
662  
663  
664  
665  
666  
667  
668  
669  
670  
671  
672  
673  
674  
675  
676  
677  
678  
679  
680  
681  
682  
683  
684  
685  
686  
687  
688  
689  
690  
691  
692  
693  
694  
695  
696  
697  
698  
699  
700  
701  
702  
703  
704  
705  
706  
707  
708  
709  
710  
711  
712  
713  
714  
715  
716  
717  
718  
719  
720  
721  
722  
723  
724  
725  
726  
727  
728  
729  
730  
731  
732  
733  
734  
735  
736  
737  
738  
739  
740  
741  
742  
743  
744  
745  
746  
747  
748  
749  
750  
751  
752  
753  
754  
755  
756  
757  
758  
759  
760  
761  
762  
763  
764  
765  
766  
767  
768  
769  
770  
771  
772  
773  
774  
775  
776  
777  
778  
779  
780  
781  
782  
783  
784  
785  
786  
787  
788  
789  
790  
791  
792  
793  
794  
795  
796  
797  
798  
799  
800  
801  
802  
803  
804  
805  
806  
807  
808  
809  
810  
811  
812  
813  
814  
815  
816  
817  
818  
819  
820  
821  
822  
823  
824  
825  
826  
827  
828  
829  
830  
831  
832  
833  
834  
835  
836  
837  
838  
839  
840  
841  
842  
843  
844  
845  
846  
847  
848  
849  
850  
851  
852  
853  
854  
855  
856  
857  
858  
859  
860  
861  
862  
863  
864  
865  
866  
867  
868  
869  
870  
871  
872  
873  
874  
875  
876  
877  
878  
879  
880  
881  
882  
883  
884  
885  
886  
887  
888  
889  
890  
891  
892  
893  
894  
895  
896  
897  
898  
899  
900  
901  
902  
903  
904  
905  
906  
907  
908  
909  
910  
911  
912  
913  
914  
915  
916  
917  
918  
919  
920  
921  
922  
923  
924  
925  
926  
927  
928  
929  
930  
931  
932  
933  
934  
935  
936  
937  
938  
939  
940  
941  
942  
943  
944  
945  
946  
947  
948  
949  
950  
951  
952  
953  
954  
955  
956  
957  
958  
959  
960  
961  
962  
963  
964  
965  
966  
967  
968  
969  
970  
971  
972  
973  
974  
975  
976  
977  
978  
979  
980  
981  
982  
983  
984  
985  
986  
987  
988  
989  
990  
991  
992  
993  
994  
995  
996  
997  
998  
999  
1000

Both sarcopenia and obesity have been shown to increase mortality risk and increase progression to end-stage renal disease in CKD patients.[63] Unlike patients receiving dialysis, treatment requirements for predialysis CKD patients are based upon the principle of maintaining a “healthy weight” and preventing or attenuating obesity.[14] In this overview, the effectiveness of exercise for body mass index was supported by four analyses with small effect sizes and moderate quality of evidence. Based on the results, exercise may contribute to lower body mass index in CKD patients. However, additional studies are needed to confirm the benefits of exercise programs for reducing sarcopenia and weight.

CKD population experience multiple symptoms that affect patient’s prognosis and HRQOL.[64] Patients who received dialysis treatment commonly reported restless legs syndrome, fatigue, and inadequate dialysis due to kidney function deterioration and dialysis-related side effects.[65, 66] These symptoms affect sleep, daily activities and impose a considerable amount of psychological distress and economic burden.[67] An increasing number of researchers have investigated the role of exercise as an important non-pharmacological strategy for preventing and/or treating symptoms. [68, 69] The results of a small number of meta-analyses suggested the beneficial effect of exercise on dialysis adequacy (SMD: 0.19 to 2.21) and improving restless legs syndrome (SMD: -1.79) and fatigue symptoms (SMD: -0.97 to -0.85). Nevertheless, the efficacy of exercise in CKD patients for preventing dialysis-related symptoms awaits new clinical evidence.

1  
2  
3 With similar results obtained in another overview that included chronic disease,[70] results from  
4 this overview demonstrated minor beneficial effects of exercise on HRQOL, irrespective of the  
5 evidence level in CKD patients. Improved HRQOL is important because most of the population  
6 reported ongoing poor health and well-being due to diet restriction, weakness, and dialysis  
7 treatment.[71] The consistent health benefits of exercise in this overview demonstrated that exercise  
8 could be a strategy to improve the poor long-term prognosis in CKD patients.  
9  
10

11  
12  
13 Several meta-analyses reported exercise-related adverse events. Based on the number of adverse  
14 events reported, we calculate that only three adverse events occurred per 1000 CKD patients. The  
15 low incidence of adverse events indicated that the benefits of exercise in CKD patients outweigh its  
16 potential risks and most reflected typical response to exercise (e.g., muscle soreness). However,  
17 most meta-analyses only included intradialytic exercise for hemodialysis patients in their  
18 assessments. Exercises during hemodialysis are usually performed under the supervision of a  
19 healthcare worker to ensure safety.[72] It has been reported that all patients with CKD are at risk  
20 for cardiovascular events (e.g., arrhythmias, myocardial ischemia) during exercise. Therefore,  
21 medical screening should be performed before exercise to determine which patients may be at  
22 increased risk for cardiovascular accidents. [73] In addition, special attention should be paid to dry  
23 weight and blood pressure in patients with hemodialysis-dependent CKD to avoid excessive volume  
24 loading or dehydration, which may increase the risk associated with exercise. [60]  
25  
26  
27  
28  
29  
30

### 31 **Implications for clinical**

32  
33  
34 Taken together, there is good reason to recommend exercise for improving prognosis in CKD  
35 patients. Evidence from most randomized controlled trials increased confidence in the findings of  
36 this umbrella review. Because most of the meta-analyses assessed in this study did not detail the  
37 exercises instituted, it is difficult to make recommendations about the type of exercise that would  
38 be the most beneficial for CKD patients. Although the effect sizes of exercise on improving the  
39 health prognosis of CKD patients were generally moderate, these effects may bring some clinical  
40 benefit to patients experiencing impaired function or symptom distress. Despite numerous meta-  
41 analyses providing only low or very low-quality evidence, similar beneficial effects of exercise were  
42 reported by meta-analyses of randomized controlled trials with different grades of evidence.  
43 Remarkably, a recently published trial found that a 6-month program of intradialytic exercise  
44 effectively reduces healthcare costs.[74] Overall, exercise should be integrated into the care of CKD,  
45 but the overall benefit of the exercise to CKD is still debatable.  
46  
47  
48  
49  
50  
51

### 52 **Limitations**

53  
54  
55 There are several limitations to this overview: 1) Most meta-analyses included in this review  
56 involve hemodialysis patients, limiting the extrapolation of the results to other stages of CKD; 2)  
57 improvement of flexibility in CKD patients was not investigated. Flexibility is an important  
58 component of physical fitness that impacts muscular injury.[75] The evidence for the efficacy of  
59  
60



1  
2  
3 exercise on flexibility improvement is insufficient for a systematic review or meta-analysis; 3)  
4 language bias may exist in this review because the search strategy was limited to English. It is  
5 unknown if meta-analyses published in other languages would influence the outcomes of our  
6 findings; 4) the results may be had been influenced by an overlap in the original studies; 5) the  
7 accuracy of the MD data cannot be guaranteed; 6) sub-group analyses of different types of exercise  
8 were not performed as described in the published protocol because of most the included meta-  
9 analyses did not detail the exercises, and 7) both body composition and cardiovascular risk factors  
10 are common terms. However, the inclusion of studies was limited, so this review focused only on  
11 body mass index and blood pressure, and more evidence is still needed for the effects of other  
12 assessment metrics.  
13  
14  
15  
16  
17

## 18 19 **CONCLUSION**

20  
21 In CKD patients, exercise appears to improve muscle strength and endurance, body composition,  
22 and HRQOL. At the same time, exercise decreases blood pressure and dialysis-related symptoms in  
23 CKD patients. However, the quality of the evidence was considered low or very low for all outcomes  
24 indicating that we have low certainty evidence to support the findings above, more rigorous study  
25 is still needed in the future. Nevertheless, given the health benefits of physical activity, exercise  
26 should be integrated into renal care for a patient with any stage of CKD.  
27  
28  
29

## 30 31 **Contributors**

32  
33 FZ and LYH conceived and designed the review. YB and XZ searched databases, extracted the data,  
34 and statistical analysis. WQZ revised the manuscript. WQW and HCZ provided technical support.  
35 All authors had read and approved the final manuscript and agreed on its submission.  
36  
37

## 38 39 **Ethics approval statement**

40  
41 Ethics approval is not required as no private information from individuals is collected.  
42

## 43 44 **Dissemination**

45  
46 The results will be published in a peer-reviewed journal or disseminated in relevant conferences.  
47

48  
49 **Funding** This study was supported by Longhua Hospital Shanghai University of Traditional  
50 Chinese Medicine (Grant number: Y21026).  
51

52  
53 **Competing interest statement** None declared.

54  
55 **Data availability statement** Data are available in a public, open access repository. All data in the  
56 overview were published through journals.  
57

58  
59 **Patient consent for publication** Not required.  
60

**Provenance and peer review** Not commissioned; externally peer reviewed.

## REFERENCES

1. Zoccali C, Vanholder R, Massy ZA, Ortiz A, Sarafidis P, Dekker FW, Fliser D, Fouque D, Heine GH, Jager KJ *et al*: **The systemic nature of CKD**. *Nat Rev Nephrol* 2017, **13**(6):344-358.
2. **Global, regional, and national burden of chronic kidney disease, 1990-2017: a systematic analysis for the Global Burden of Disease Study 2017**. *Lancet* 2020, **395**(10225):709-733.
3. Yang C, Gao B, Zhao X, Su Z, Sun X, Wang HY, Zhang P, Wang R, Liu J, Tang W *et al*: **Executive summary for China Kidney Disease Network (CK-NET) 2016 Annual Data Report**. *Kidney Int* 2020, **98**(6):1419-1423.
4. Cheng HT, Xu X, Lim PS, Hung KY: **Worldwide Epidemiology of Diabetes-Related End-Stage Renal Disease, 2000-2015**. *Diabetes Care* 2020.
5. Roshanravan B, Robinson-Cohen C, Patel KV, Ayers E, Littman AJ, de Boer IH, Ikizler TA, Himmelfarb J, Katznel LI, Kestenbaum B *et al*: **Association between physical performance and all-cause mortality in CKD**. *J Am Soc Nephrol* 2013, **24**(5):822-830.
6. Wang XH, Mitch WE: **Mechanisms of muscle wasting in chronic kidney disease**. *Nat Rev Nephrol* 2014, **10**(9):504-516.
7. Hoshino J: **Renal Rehabilitation: Exercise Intervention and Nutritional Support in Dialysis Patients**. *Nutrients* 2021, **13**(5):1444.
8. Wilund KR, Viana JL, Perez LM: **A Critical Review of Exercise Training in Hemodialysis Patients: Personalized Activity Prescriptions Are Needed**. *Exerc Sport Sci Rev* 2020, **48**(1):28-39.
9. Tentori F, Elder SJ, Thumma J, Pisoni RL, Bommer J, Fissell RB, Fukuhara S, Jadoul M, Keen ML, Saran R *et al*: **Physical exercise among participants in the Dialysis Outcomes and Practice Patterns Study (DOPPS): correlates and associated outcomes**. *Nephrol Dial Transplant* 2010, **25**(9):3050-3062.
10. Heiwe S, Jacobson SH: **Exercise training in adults with CKD: a systematic review and meta-analysis**. *Am J Kidney Dis* 2014, **64**(3):383-393.
11. Wong L, Duque G, McMahon LP: **Sarcopenia and Frailty: Challenges in Mainstream Nephrology Practice**. *Kidney Int Rep* 2021, **6**(10):2554-2564.
12. Rampersad C, Darcel J, Harasemiw O, Brar RS, Komenda P, Rigatto C, Prasad B, Bohm C, Tangri N: **Change in Physical Activity and Function in Patients with Baseline Advanced Nondialysis CKD**. *Clin J Am Soc Nephrol* 2021, **16**(12):1805-1812.
13. March DS, Graham-Brown MP, Young HM, Greenwood SA, Burton JO: **'There is nothing more deceptive than an obvious fact': more evidence for the prescription of exercise during haemodialysis (intradialytic exercise) is still required**. *Br J Sports Med* 2017, **51**(18):1379.
14. **Clinical Practice Guideline: Exercise and Lifestyle in Chronic Kidney Disease** [[https://renal.org/sites/renal.org/files/Exercise%20and%20Lifestyle%20in%20CKD%20clinical%20practice%20guideline33\\_v4\\_FINAL\\_0.pdf](https://renal.org/sites/renal.org/files/Exercise%20and%20Lifestyle%20in%20CKD%20clinical%20practice%20guideline33_v4_FINAL_0.pdf)]
15. Yamagata K, Hoshino J, Sugiyama H, Hanafusa N, Shibagaki Y, Komatsu Y, Konta T, Fujii N, Kanda E, Sofue T *et al*: **Clinical practice guideline for renal rehabilitation: Systematic reviews and recommendations of exercise therapies in patients with kidney diseases**. *Renal*

- 1  
2  
3  
4  
5  
6  
7  
8  
9  
10  
11  
12  
13  
14  
15  
16  
17  
18  
19  
20  
21  
22  
23  
24  
25  
26  
27  
28  
29  
30  
31  
32  
33  
34  
35  
36  
37  
38  
39  
40  
41  
42  
43  
44  
45  
46  
47  
48  
49  
50  
51  
52  
53  
54  
55  
56  
57  
58  
59  
60
- Replacement Therapy* 2019, **5**.
16. Deschamps T: **Let's programme exercise during haemodialysis (intradialytic exercise) into the care plan for patients, regardless of age.** *Br J Sports Med* 2016, **50**(22):1357-1358.
17. Shamseer L, Moher D, Clarke M, Ghersi D, Liberati A, Petticrew M, Shekelle P, Stewart LA: **Preferred reporting items for systematic review and meta-analysis protocols (PRISMA-P) 2015: elaboration and explanation.** *Bmj* 2015, **350**:g7647.
18. Zhang F, Wang H, Huang L, Zhang H: **Therapeutic effects of exercise interventions for patients with chronic kidney disease: protocol for an overview of systematic reviews and meta-analyses of clinical trials.** *BMJ Open* 2021, **11**(2):e043011.
19. Shea BJ, Reeves BC, Wells G, Thuku M, Hamel C, Moran J, Moher D, Tugwell P, Welch V, Kristjansson E *et al*: **AMSTAR 2: a critical appraisal tool for systematic reviews that include randomised or non-randomised studies of healthcare interventions, or both.** *Bmj* 2017, **358**:j4008.
20. Grgic J, Grgic I, Pickering C, Schoenfeld BJ, Bishop DJ, Pedisic Z: **Wake up and smell the coffee: caffeine supplementation and exercise performance-an umbrella review of 21 published meta-analyses.** *Br J Sports Med* 2020, **54**(11):681-688.
21. Cohen J: **Quantitative methods in psychology: A power primer.** *Psychological Bulletin* 1992, **112**:115-159.
22. Higgins JP, Thompson SG, Deeks JJ, Altman DG: **Measuring inconsistency in meta-analyses.** *Bmj* 2003, **327**(7414):557-560.
23. Atkins D, Best D, Briss PA, Eccles M, Falck-Ytter Y, Flottorp S, Guyatt GH, Harbour RT, Haugh MC, Henry D *et al*: **Grading quality of evidence and strength of recommendations.** *Bmj* 2004, **328**(7454):1490.
24. Andrade FP, Rezende PS, Ferreira TS, Borba GC, Muller AM, Rovedder PME: **Effects of intradialytic exercise on cardiopulmonary capacity in chronic kidney disease: systematic review and meta-analysis of randomized clinical trials.** *Sci Rep* 2019, **9**(1):18470.
25. Bogataj S, Pajek M, Pajek J, Buturovic Ponikvar J, Paravlic A: **Exercise-Based Interventions in Hemodialysis Patients: A Systematic Review with a Meta-Analysis of Randomized Controlled Trials.** *J Clin Med* 2019, **9**(1).
26. Cheema BS, Chan D, Fahey P, Atlantis E: **Effect of progressive resistance training on measures of skeletal muscle hypertrophy, muscular strength and health-related quality of life in patients with chronic kidney disease: a systematic review and meta-analysis.** *Sports Med* 2014, **44**(8):1125-1138.
27. Chen G, Gao L, Li X: **Effects of exercise training on cardiovascular risk factors in kidney transplant recipients: a systematic review and meta-analysis.** *Ren Fail* 2019, **41**(1):408-418.
28. Chung YC, Yeh ML, Liu YM: **Effects of intradialytic exercise on the physical function, depression and quality of life for haemodialysis patients: a systematic review and meta-analysis of randomised controlled trials.** *J Clin Nurs* 2017, **26**(13-14):1801-1813.
29. Clarkson MJ, Bennett PN, Fraser SF, Warmington SA: **Exercise interventions for improving objective physical function in patients with end-stage kidney disease on dialysis: a systematic review and meta-analysis.** *Am J Physiol Renal Physiol* 2019, **316**(5):F856-f872.
30. Ferrari F, Helal L, Dipp T, Soares D, Soldatelli A, Mills AL, Paz C, Tenorio MCC, Motta MT, Barcellos FC *et al*: **Intradialytic training in patients with end-stage renal disease: a systematic review and meta-analysis of randomized clinical trials assessing the effects of**

- 1  
2  
3  
4  
5  
6  
7  
8  
9  
10  
11  
12  
13  
14  
15  
16  
17  
18  
19  
20  
21  
22  
23  
24  
25  
26  
27  
28  
29  
30  
31  
32  
33  
34  
35  
36  
37  
38  
39  
40  
41  
42  
43  
44  
45  
46  
47  
48  
49  
50  
51  
52  
53  
54  
55  
56  
57  
58  
59  
60
- five different training interventions. *J Nephrol* 2020, **33**(2):251-266.
31. Ferreira GD, Bohlke M, Correa CM, Dias EC, Orcy RB: **Does Intradialytic Exercise Improve Removal of Solutes by Hemodialysis? A Systematic Review and Meta-analysis.** *Arch Phys Med Rehabil* 2019, **100**(12):2371-2380.
32. Gomes Neto M, de Lacerda FFR, Lopes AA, Martinez BP, Saquetto MB: **Intradialytic exercise training modalities on physical functioning and health-related quality of life in patients undergoing maintenance hemodialysis: systematic review and meta-analysis.** *Clin Rehabil* 2018, **32**(9):1189-1202.
33. Heiwe S, Jacobson SH: **Exercise training for adults with chronic kidney disease.** *Cochrane Database Syst Rev* 2011(10):Cd003236.
34. Huang M, Lv A, Wang J, Xu N, Ma G, Zhai Z, Zhang B, Gao J, Ni C: **Exercise Training and Outcomes in Hemodialysis Patients: Systematic Review and Meta-Analysis.** *Am J Nephrol* 2019, **50**(4):240-254.
35. Ju H, Chen H, Mi C, Chen Y, Zuang C: **The Impact of Home-Based Exercise Program on Physical Function of Chronic Kidney Disease Patients: A Meta-Analysis of Randomized Controlled Trials.** *Physikalische Medizin, Rehabilitationsmedizin, Kurortmedizin* 2020, **30**(02):108-114.
36. Lu Y, Wang Y, Lu Q: **Effects of Exercise on Muscle Fitness in Dialysis Patients: A Systematic Review and Meta-Analysis.** *Am J Nephrol* 2019, **50**(4):291-302.
37. Matsuzawa R, Hoshi K, Yoneki K, Harada M, Watanabe T, Shimoda T, Yamamoto S, Matsunaga A: **Exercise Training in Elderly People Undergoing Hemodialysis: A Systematic Review and Meta-analysis.** *Kidney Int Rep* 2017, **2**(6):1096-1110.
38. Nakamura K, Sasaki T, Yamamoto S, Hayashi H, Ako S, Tanaka Y: **Effects of exercise on kidney and physical function in patients with non-dialysis chronic kidney disease: a systematic review and meta-analysis.** *Sci Rep* 2020, **10**(1):18195.
39. Oguchi H, Tsujita M, Yazawa M, Kawaguchi T, Hoshino J, Kohzuki M, Ito O, Yamagata K, Shibagaki Y, Sofue T: **The efficacy of exercise training in kidney transplant recipients: a meta-analysis and systematic review.** *Clin Exp Nephrol* 2019, **23**(2):275-284.
40. Pei G, Tang Y, Tan L, Tan J, Ge L, Qin W: **Aerobic exercise in adults with chronic kidney disease (CKD): a meta-analysis.** *Int Urol Nephrol* 2019, **51**(10):1787-1795.
41. Pu J, Jiang Z, Wu W, Li L, Zhang L, Li Y, Liu Q, Ou S: **Efficacy and safety of intradialytic exercise in haemodialysis patients: a systematic review and meta-analysis.** *BMJ Open* 2019, **9**(1):e020633.
42. Salhab N, Karavetian M, Kooman J, Fiaccadori E, El Khoury CF: **Effects of intradialytic aerobic exercise on hemodialysis patients: a systematic review and meta-analysis.** *J Nephrol* 2019, **32**(4):549-566.
43. Sheng K, Zhang P, Chen L, Cheng J, Wu C, Chen J: **Intradialytic exercise in hemodialysis patients: a systematic review and meta-analysis.** *Am J Nephrol* 2014, **40**(5):478-490.
44. Smart N, Steele M: **Exercise training in haemodialysis patients: a systematic review and meta-analysis.** *Nephrology (Carlton)* 2011, **16**(7):626-632.
45. Song YY, Hu RJ, Diao YS, Chen L, Jiang XL: **Effects of Exercise Training on Restless Legs Syndrome, Depression, Sleep Quality, and Fatigue Among Hemodialysis Patients: A Systematic Review and Meta-analysis.** *J Pain Symptom Manage* 2018, **55**(4):1184-1195.
46. Thompson S, Wiebe N, Padwal RS, Gyenes G, Headley SAE, Radhakrishnan J, Graham M:

- 1  
2  
3  
4  
5  
6  
7  
8  
9  
10  
11  
12  
13  
14  
15  
16  
17  
18  
19  
20  
21  
22  
23  
24  
25  
26  
27  
28  
29  
30  
31  
32  
33  
34  
35  
36  
37  
38  
39  
40  
41  
42  
43  
44  
45  
46  
47  
48  
49  
50  
51  
52  
53  
54  
55  
56  
57  
58  
59  
60
- The effect of exercise on blood pressure in chronic kidney disease: A systematic review and meta-analysis of randomized controlled trials.** *PLoS One* 2019, **14**(2):e0211032.
47. Vanden Wyngaert K, Van Craenenbroeck AH, Van Biesen W, Dhondt A, Tanghe A, Van Ginckel A, Celie B, Calders P: **The effects of aerobic exercise on eGFR, blood pressure and VO<sub>2</sub>peak in patients with chronic kidney disease stages 3-4: A systematic review and meta-analysis.** *PLoS One* 2018, **13**(9):e0203662.
48. Wu X, Yang L, Wang Y, Wang C, Hu R, Wu Y: **Effects of combined aerobic and resistance exercise on renal function in adult patients with chronic kidney disease: a systematic review and meta-analysis.** *Clin Rehabil* 2020, **34**(7):851-865.
49. Yamamoto R, Ito T, Nagasawa Y, Matsui K, Egawa M, Nanami M, Isaka Y, Okada H: **Efficacy of aerobic exercise on the cardiometabolic and renal outcomes in patients with chronic kidney disease: a systematic review of randomized controlled trials.** *J Nephrol* 2021, **34**(1):155-164.
50. Yang H, Wu X, Wang M: **Exercise Affects Cardiopulmonary Function in Patients with Chronic Kidney Disease: A Meta-Analysis.** *Biomed Res Int* 2017, **2017**:6405797.
51. Zhang F, Zhou W, Sun Q, Zhai Y, Zhang Y, Su H, Wang Z: **Effects of intradialytic resistance exercises on physical performance, nutrient intake and quality of life among haemodialysis people: A systematic review and meta-analysis.** *Nurs Open* 2021, **8**(2):529-538.
52. Zhang L, Wang Y, Xiong L, Luo Y, Huang Z, Yi B: **Exercise therapy improves eGFR, and reduces blood pressure and BMI in non-dialysis CKD patients: evidence from a meta-analysis.** *BMC Nephrol* 2019, **20**(1):398.
53. Zhao QG, Zhang HR, Wen X, Wang Y, Chen XM, Chen N, Sun Y, Liu H, Lu PJ: **Exercise interventions on patients with end-stage renal disease: a systematic review.** *Clin Rehabil* 2019, **33**(2):147-156.
54. !!! INVALID CITATION !!! .
55. Clyne N, Anding-Rost K: **Exercise training in chronic kidney disease-effects, expectations and adherence.** *Clin Kidney J* 2021, **14**(Suppl 2):ii3-ii14.
56. Webster AC, Nagler EV, Morton RL, Masson P: **Chronic Kidney Disease.** *Lancet* 2017, **389**(10075):1238-1252.
57. Cheung AK, Chang TI, Cushman WC, Furth SL, Ix JH, Pecoits-Filho R, Perkovic V, Sarnak MJ, Tobe SW, Tomson CRV *et al*: **Blood pressure in chronic kidney disease: conclusions from a Kidney Disease: Improving Global Outcomes (KDIGO) Controversies Conference.** *Kidney Int* 2019, **95**(5):1027-1036.
58. Kuo CP, Tsai MT, Lee KH, Lin YP, Huang SS, Huang CC, Tseng WC, Tarng DC: **Dose-response effects of physical activity on all-cause mortality and major cardiorenal outcomes in chronic kidney disease.** *Eur J Prev Cardiol* 2021.
59. Graham-Brown MPM, March DS, Young R, Highton PJ, Young HML, Churchward DR, Dungey M, Stensel DJ, Bishop NC, Brunskill NJ *et al*: **A randomized controlled trial to investigate the effects of intra-dialytic cycling on left ventricular mass.** *Kidney International* 2021.
60. Zelle DM, Klaassen G, van Adrichem E, Bakker SJ, Corpeleijn E, Navis G: **Physical inactivity: a risk factor and target for intervention in renal care.** *Nat Rev Nephrol* 2017, **13**(3):152-168.

- 1  
2  
3  
4  
5  
6  
7  
8  
9  
10  
11  
12  
13  
14  
15  
16  
17  
18  
19  
20  
21  
22  
23  
24  
25  
26  
27  
28  
29  
30  
31  
32  
33  
34  
35  
36  
37  
38  
39  
40  
41  
42  
43  
44  
45  
46  
47  
48  
49  
50  
51  
52  
53  
54  
55  
56  
57  
58  
59  
60
61. Mezzani A, Hamm LF, Jones AM, McBride PE, Moholdt T, Stone JA, Urhausen A, Williams MA: **Aerobic exercise intensity assessment and prescription in cardiac rehabilitation: a joint position statement of the European Association for Cardiovascular Prevention and Rehabilitation, the American Association of Cardiovascular and Pulmonary Rehabilitation and the Canadian Association of Cardiac Rehabilitation.** *Eur J Prev Cardiol* 2013, **20**(3):442-467.
62. Chan D, Cheema BS: **Progressive Resistance Training in End-Stage Renal Disease: Systematic Review.** *Am J Nephrol* 2016, **44**(1):32-45.
63. Androga L, Sharma D, Amodu A, Abramowitz MK: **Sarcopenia, obesity, and mortality in US adults with and without chronic kidney disease.** *Kidney Int Rep* 2017, **2**(2):201-211.
64. Weisbord SD, Fried LF, Arnold RM, Fine MJ, Levenson DJ, Peterson RA, Switzer GE: **Prevalence, severity, and importance of physical and emotional symptoms in chronic hemodialysis patients.** *J Am Soc Nephrol* 2005, **16**(8):2487-2494.
65. Flythe JE, Hilliard T, Castillo G, Ikeler K, Orazi J, Abdel-Rahman E, Pai AB, Rivara MB, St Peter WL, Weisbord SD *et al*: **Symptom Prioritization among Adults Receiving In-Center Hemodialysis: A Mixed Methods Study.** *Clin J Am Soc Nephrol* 2018, **13**(5):735-745.
66. Gregg LP, Bossola M, Ostrosky-Frid M, Hedayati SS: **Fatigue in CKD: Epidemiology, Pathophysiology, and Treatment.** *Clin J Am Soc Nephrol* 2021.
67. Flythe JE, Dorough A, Narendra JH, Forfang D, Hartwell L, Abdel-Rahman E: **Perspectives on symptom experiences and symptom reporting among individuals on hemodialysis.** *Nephrol Dial Transplant* 2018, **33**(10):1842-1852.
68. Metzger M, Abdel-Rahman EM, Boykin H, Song MK: **A Narrative Review of Management Strategies for Common Symptoms in Advanced CKD.** *Kidney Int Rep* 2021, **6**(4):894-904.
69. Johansen KL: **The Promise and Challenge of Aerobic Exercise in People Undergoing Long-Term Hemodialysis.** *Clin J Am Soc Nephrol* 2021, **16**(4):505-507.
70. Fuller JT, Hartland MC, Maloney LT, Davison K: **Therapeutic effects of aerobic and resistance exercises for cancer survivors: a systematic review of meta-analyses of clinical trials.** *Br J Sports Med* 2018, **52**(20):1311.
71. Amir N, Tong A, McCarthy H, Howell M: **Trajectories of quality of life in chronic kidney disease: a novel perspective of disease progression.** *Nephrol Dial Transplant* 2021.
72. Parker K: **Intradialytic Exercise is Medicine for Hemodialysis Patients.** *Curr Sports Med Rep* 2016, **15**(4):269-275.
73. Smart NA, Williams AD, Levinger I, Selig S, Howden E, Coombes JS, Fasset RG: **Exercise & Sports Science Australia (ESSA) position statement on exercise and chronic kidney disease.** *J Sci Med Sport* 2013, **16**(5):406-411.
74. March DS, Hurt AW, Grantham CE, Churchward DR, Young HML, Highton PJ, Dungey M, Bishop NC, Smith AC, Graham-Brown MPM *et al*: **A Cost-Effective Analysis of the CYCLE-HD Randomized Controlled Trial.** *Kidney International Reports*.
75. Fuhrmann I, Krause R: **Principles of exercising in patients with chronic kidney disease, on dialysis and for kidney transplant recipients.** *Clin Nephrol* 2004, **61** Suppl 1:S14-25.

**Table 1 Summary of the effect of exercise on cardiovascular risk factor in CKD patients**

| Author (year)    | Design        | Stage of CKD | k (n)*  | Exercise type | Mode          | SMD or MD (95% CI)     | Effect size | P     | I <sup>2</sup> | GRADE |
|------------------|---------------|--------------|---------|---------------|---------------|------------------------|-------------|-------|----------------|-------|
| <b>SBP</b>       |               |              |         |               |               |                        |             |       |                |       |
| Pei (2019)       | RCT/quasi-RCT | Mixed        | 12(514) | AE            | -             | MD:-2.91 (-6.68, 0.87) | -           | 0.13  | 40.0%          | ⊕⊕○○  |
| Wu (2020)        | RCT/quasi-RCT | Predialysis  | 3 (204) | AE+RT         | -             | SMD:-0.19(-0.46,0.08)  | Small       | 0.16  | 50.0%          | ⊕○○○  |
| Chen (2019)      | RCT           | KTRs         | 5(198)  | Mixed         | -             | SMD:0.18(-0.10,0.46)   | Small       | 0.21  | 0.0%           | ⊕○○○  |
| Pu (2019)        | RCT           | HD           | 7(287)  | Mixed         | Intradialytic | SMD:-0.28(-0.52,-0.05) | Small       | 0.02  | 0.0%           | ⊕○○○  |
| Yamamoto (2021)  | RCT           | Predialysis  | 10(392) | AE            | -             | SMD:-0.75(-1.24,-0.26) | Moderate    | 0.003 | 80.3%          | ⊕○○○  |
| Thompson (2019)  | RCT           | Predialysis  | 10(335) | Mixed         | -             | MD:-4.30(-9.00,0.40)   | -           | N.P.  | 50.4%          | ⊕○○○  |
| Zhang (2019)     | RCT           | Predialysis  | 14(463) | Mixed         | -             | SMD:-0.41(-0.70,-0.11) | Small       | 0.007 | 55.0%          | ⊕⊕⊕○  |
| Huang (2019)     | RCT           | HD           | 7(260)  | Mixed         | Mixed         | SMD:-0.17(-0.41,0.08)  | Small       | 0.18  | 8.0%           | ⊕⊕○○  |
| Heiwe (2011)     | RCT/quasi-RCT | Mixed        | 9(347)  | Mixed         | -             | SMD:0.25(0.04,0.47)    | Small       | 0.02  | 0.0%           | ⊕○○○  |
| Heiwe (2014)     | RCT           | HD           | 10(312) | Mixed         | -             | SMD:0.04(-0.34,0.41)   | Small       | 0.8   | 58.0%          | ⊕○○○  |
| Sheng (2014)     | RCT           | HD           | 7(296)  | Mixed         | Intradialytic | SMD:-0.27(-0.50,-0.04) | Small       | 0.02  | 0.0%           | ⊕○○○  |
| Ferrari (2019)   | RCT           | HD           | 10(332) | AE            | Intradialytic | MD:-10.07(16.35,-3.78) | -           | 0.002 | 44.0%          | ⊕○○○  |
| Wynngaert (2018) | RCT           | Predialysis  | 8(269)  | AE            | -             | SMD:0.08(-0.58,0.74)   | Small       | 0.81  | 84%            | ⊕○○○  |
| <b>DBP</b>       |               |              |         |               |               |                        |             |       |                |       |
| Pei (2019)       | RCT/quasi-RCT | Mixed        | 12(514) | AE            | -             | MD:-1.11 (-3.41, 1.20) | -           | 0.35  | 0.0%           | ⊕⊕○○  |
| Wu (2020)        | RCT/quasi-RCT | Predialysis  | 4 (194) | AE+RT         | -             | SMD:-0.47(-1.10,0.15)  | Small       | 0.14  | 70.0%          | ⊕○○○  |
| Chen (2019)      | RCT           | KTRs         | 5(198)  | Mixed         | -             | SMD:0.04(-0.45,0.52)   | Small       | 0.89  | 59.0%          | ⊕○○○  |
| Pu (2019)        | RCT           | HD           | 7(287)  | Mixed         | Intradialytic | SMD:-0.32(-0.55,-0.08) | Small       | 0.008 | 42.0%          | ⊕○○○  |
| Thompson (2019)  | RCT           | Predialysis  | 8(303)  | Mixed         | -             | MD:-1.18(-4.76,2.40)   | -           | N.P.  | 60.5%          | ⊕○○○  |

1  
2  
3  
4  
5  
6  
7  
8  
9  
10  
11  
12  
13  
14  
15  
16  
17  
18  
19  
20  
21  
22  
23  
24  
25  
26  
27  
28  
29  
30  
31  
32  
33  
34  
35  
36  
37  
38  
39  
40  
41  
42  
43  
44  
45  
46

|                 |               |             |         |       |               |                        |       |      |       |      |
|-----------------|---------------|-------------|---------|-------|---------------|------------------------|-------|------|-------|------|
| Zhang (2019)    | RCT           | Predialysis | 12(399) | Mixed | -             | SMD:-0.31(-0.71,0.08)  | Small | 0.12 | 70.0% | ⊕⊕○○ |
| Huang (2019)    | RCT           | HD          | 7(260)  | Mixed | Mixed         | SMD:-0.23(-0.69,0.24)  | Small | 0.34 | 68.0% | ⊕○○○ |
| Heiwe (2011)    | RCT/quasi-RCT | Mixed       | 11(419) | Mixed | -             | SMD:0.16(-0.04,0.36)   | Small | 0.11 | 40.0% | ⊕○○○ |
| Heiwe (2014)    | RCT           | HD          | 10(212) | Mixed | Mixed         | SMD:0.17(-0.16,0.49)   | Small | 0.3  | 45.0% | ⊕⊕○○ |
| Sheng (2014)    | RCT           | HD          | 7(296)  | Mixed | Intradialytic | SMD:-0.24(-0.47,-0.01) | Small | 0.04 | 52.1% | ⊕○○○ |
| Ferrari (2019)  | RCT           | HD          | 10(334) | AE    | Intradialytic | MD:-2.96(-7.71,1.78)   | -     | 0.22 | 0.0%  | ⊕○○○ |
| Wyngaert (2018) | RCT           | Predialysis | 7(237)  | AE    | -             | SMD-0.09(-0.78,0.59)   | Small | 0.79 | 83%   | ⊕○○○ |

Abbreviation: RCT = randomized controlled trial; AE = aerobic exercise; RT = resistance training; DBP = diastolic blood pressure; SBP = systolic blood pressure; SMD = standardized mean difference; MD = mean difference; HD = hemodialysis; KTRs = kidney transplant recipients; GRADE = Grading of Recommendations Assessment, Development, and Evaluation; N.P. = no report.

\*Number of included studies and corresponding sample size.

Mixed means aerobic exercise combined with resistance training.



**Table 2 Summary of the effect of exercise on cardiopulmonary fitness in CKD patients**

| Author (year)       | Design         | Stage of CKD | k (n)*  | Exercise type | Mode          | SMD or MD (95% CI)   | Effect size | P      | I <sup>2</sup> | GRADE |
|---------------------|----------------|--------------|---------|---------------|---------------|----------------------|-------------|--------|----------------|-------|
| VO <sub>2peak</sub> |                |              |         |               |               |                      |             |        |                |       |
| Pei (2019)          | RCT/quasi-RCT  | Mixed        | 17(464) | AE            | -             | MD:2.08(1.10,3.05)   | -           | <0.001 | 25.0%          | ⊕⊕○○  |
| Nakamura (2020)     | RCT/cross-over | Predialysis  | 10(401) | Mixed         | -             | SMD:0.88(0.53,1.23)  | Large       | <0.001 | 56.0%          | ⊕⊕○○  |
| Chen (2019)         | RCT            | KTRs         | 6(202)  | Mixed         | -             | SMD:0.33(-0.02,0.69) | Small       | 0.06   | 27.0%          | ⊕○○○  |
| Andrade (2019)      | RCT            | HD           | 5(201)  | AE+RT         | Intradialytic | SMD:1.01(0.71,1.30)  | Large       | <0.001 | 0.0%           | ⊕⊕○○  |
| Chung (2016)        | RCT            | HD           | 6(238)  | Mixed         | Intradialytic | SMD:0.55(0.18,0.92)  | Moderate    | 0.003  | 52.9%          | ⊕○○○  |
| Pu (2019)           | RCT            | HD           | 10(400) | Mixed         | Intradialytic | SMD:0.57(0.23,0.90)  | Moderate    | <0.001 | 59.0%          | ⊕⊕○○  |
| Yamamoto (2021)     | RCT            | Predialysis  | 10(365) | AE            | -             | SMD:0.54(0.29,0.78)  | Moderate    | <0.001 | 24.6%          | ⊕○○○  |
| Yang (2017)         | RCT            | Mixed        | 5(179)  | Mixed         | -             | SMD:0.33(0.03,0.63)  | Small       | 0.003  | 47.0%          | ⊕⊕○○  |
| Huang (2019)        | RCT            | HD           | 10(371) | Mixed         | Mixed         | SMD:0.73(0.52,0.95)  | Moderate    | <0.001 | 71.0%          | ⊕⊕○○  |
| Matsuzawa (2017)    | RCT            | HD           | 18(582) | Mixed         | Mixed         | SMD:0.62(0.38,0.87)  | Moderate    | <0.001 | 49.0%          | ⊕⊕⊕⊕  |

1  
2  
3  
4  
5  
6  
7  
8  
9  
10  
11  
12  
13  
14  
15  
16  
17  
18  
19  
20  
21  
22  
23  
24  
25  
26  
27  
28  
29  
30  
31  
32  
33  
34  
35  
36  
37  
38  
39  
40  
41  
42  
43  
44  
45  
46

|                 |                   |                 |         |       |                   |                       |          |        |        |      |
|-----------------|-------------------|-----------------|---------|-------|-------------------|-----------------------|----------|--------|--------|------|
| Smart (2011)    | RCT               | HD              | 8(365)  | Mixed | Mixed             | SMD:0.75(0.39,1.11)   | Moderate | <0.001 | 60.0 % | ⊕⊕○○ |
| Bogataj (2020)  | RCT               | HD              | 20(504) | Mixed | Mixed             | SMD:0.58(0.32,0.85)   | Moderate | <0.001 | 57.4 % | ⊕○○○ |
| Sheng (2014)    | RCT               | HD              | 7(310)  | Mixed | Intradialyti<br>c | SMD:0.53(0.30,0.76)   | Moderate | <0.001 | 36.0 % | ⊕○○○ |
| Neto (2018)     | RCT               | HD              | 10(394) | Mixed | Intradialyti<br>c | SMD:0.60(0.15,1.04)   | Moderate | 0.008  | 76.0 % | ⊕○○○ |
| Ferrari (2019)  | RCT               | HD              | 5(201)  | AE+RT | Intradialyti<br>c | MD:5.41(4.03,6.79)    | -        | <0.001 | 0.0%   | ⊕○○○ |
| Ferrari (2019)  | RCT               | HD              | 7(248)  | AE    | Intradialyti<br>c | MD:2.07(0.42,3.72)    | -        | <0.001 | 0.0%   | ⊕○○○ |
| Wyngaert (2018) | RCT               | Predialysi<br>s | 11(325) | AE    | -                 | SMD:0.99(0.49,1.48)   | Large    | <0.001 | 74.0 % | ⊕○○○ |
| Oguchi (2018)   | RCT               | KTRs            | 4(182)  | Mixed | -                 | SMD:0.38(-0.06,0.82)  | Small    | 0.09   | 45.0 % | ⊕⊕○○ |
| 6MWT            |                   |                 |         |       |                   |                       |          |        |        |      |
| Pei (2019)      | RCT/quasi-<br>RCT | Mixed           | 8 (496) | AE    | -                 | MD:0.04 (-0.52, 0.59) | -        | 0.90   | 86.0 % | ⊕○○○ |
| Nakamura (2020) | RCT/cross-over    | Predialysi<br>s | 5(392)  | Mixed | -                 | SMD:1.04(0.17,1.90)   | Large    | 0.02   | 92.0 % | ⊕○○○ |
| Lu (2019)       | RCT               | Dialysis        | 11(300) | Mixed | Mixed             | SMD:0.52(0.31,0.72)   | Moderate | <0.001 | 39.0 % | ⊕⊕⊕○ |
| Chung (2016)    | RCT               | HD              | 4(127)  | Mixed | Intradialyti<br>c | SMD:0.44(0.09,0.80)   | Small    | 0.015  | 0.0%   | ⊕⊕○○ |

|                  |               |          |         |       |               |                        |          |        |       |      |
|------------------|---------------|----------|---------|-------|---------------|------------------------|----------|--------|-------|------|
| Zhang (2021)     | RCT           | HD       | 8(299)  | RT    | Intradialytic | SMD:0.52(0.28,0.75)    | Moderate | <0.001 | 18.7% | ⊕⊕○○ |
| Pu (2019)        | RCT           | HD       | 7(219)  | Mixed | Intradialytic | SMD:0.57(0.30,0.84)    | Moderate | <0.001 | 0.0%  | ⊕⊕○○ |
| Clarkson (2019)  | RCT           | Dialysis | 18(744) | Mixed | -             | MD:33.64(23.74,43.54)  | -        | <0.001 | 0.0%  | ⊕⊕⊕○ |
| Huang (2019)     | RCT           | HD       | 7(205)  | Mixed | Mixed         | SMD:1.01(0.26,1.76)    | Large    | 0.008  | 83.0% | ⊕○○○ |
| Matsuzawa (2017) | RCT           | HD       | 10(326) | Mixed | Mixed         | SMD:0.58(0.24,0.93)    | Moderate | <0.001 | 53.0% | ⊕⊕○○ |
| Bogataj (2020)   | RCT           | HD       | 19      | Mixed | Mixed         | SMD:0.44(0.21,0.67)    | Small    | <0.001 | 49.6% | ⊕○○○ |
| Sheng (2014)     | RCT           | HD       | 4(146)  | Mixed | Intradialytic | SMD:0.58(0.23,0.93)    | Moderate | <0.001 | 89.7% | ⊕○○○ |
| Neto (2018)      | RCT           | HD       | 6(158)  | Mixed | Intradialytic | SMD:0.96(0.11,1.80)    | Large    | 0.03   | 82.0% | ⊕○○○ |
| Ferrari (2019)   | RCT           | HD       | 6(211)  | RT    | Intradialytic | MD:68.5(29.05,107.96)  | -        | <0.001 | 36.0% | ⊕○○○ |
| Ferrari (2019)   | RCT           | HD       | 6(188)  | AE    | Intradialytic | MD:64.98(43.86,86.11)  | -        | <0.001 | 0.0%  | ⊕○○○ |
| Aerobic capacity |               |          |         |       |               |                        |          |        |       |      |
| Heiwe (2011)     | RCT/quasi-RCT | Mixed    | 24(847) | Mixed | -             | SMD:-0.56(-0.70,-0.42) | Moderate | <0.001 | 12.0% | ⊕○○○ |
| Heiwe (2014)     | RCT           | HD       | 21(374) | Mixed | Mixed         | SMD:-0.80(-1.02,-0.58) | Large    | <0.001 | 0.0%  | ⊕⊕○○ |

Abbreviation: RCT = randomized controlled trial; AE = aerobic exercise; RT = resistance training;  $VO_{2peak}$  = peak oxygen uptake; 6MWT = 6 minutes walk test; SMD = standardized mean difference; MD = mean difference; HD = hemodialysis; KTRs = kidney transplant recipients; GRADE = Grading of Recommendations Assessment, Development, and Evaluation.

1  
2  
3  
4  
5  
6  
7  
8  
9  
10  
11  
12  
13  
14  
15  
16  
17  
18  
19  
20  
21  
22  
23  
24  
25  
26  
27  
28  
29  
30  
31  
32  
33  
34  
35  
36  
37  
38  
39  
40  
41  
42  
43  
44  
45  
46

\*Number of included studies and corresponding sample size.  
Mixed means aerobic exercise combined with resistance training.

For peer review only

**Table 3 Summary of the effect of exercise on muscle strength in CKD patients**

| Author(year)     | Design         | Stage of CKD | k (n)*  | Exercise type | Mode          | SMD or MD(95% CI)      | Effect size | P      | I <sup>2</sup> | GRADE |
|------------------|----------------|--------------|---------|---------------|---------------|------------------------|-------------|--------|----------------|-------|
| Cheema (2014)    | RCT            | Predialysis  | 7(249)  | RT            | -             | SMD:1.15(0.80,1.49)    | Large       | 0.161  | 35.0%          | ⊕⊕○○  |
| Nakamura (2020)  | RCT/cross-over | Predialysis  | 4(119)  | Mixed         | -             | SMD:0.35(-0.03,0.73)   | Small       | 0.07   | 7.0%           | ⊕○○○  |
| Lu (2019)        | RCT            | Dialysis     | 5(234)  | Mixed         | Mixed         | SMD:0.59(0.20,0.98)    | Moderate    | 0.003  | 52.0%          | ⊕⊕○○  |
| Lu (2019)        | RCT            | Dialysis     | 7(224)  | Mixed         | Mixed         | SMD:0.47(0.20,0.74)    | Small       | <0.001 | 0.0%           | ⊕⊕○○  |
| Zhang (2021)     | RCT            | HD           | 6(300)  | RT            | Intradialytic | SMD:0.35(0.12,0.58)    | Small       | 0.003  | 41.6%          | ⊕⊕○○  |
| Heiwe (2011)     | RCT/quasi-RCT  | Mixed        | 9(358)  | Mixed         | -             | SMD:-0.52(-0.73,-0.31) | Moderate    | <0.001 | 0.0%           | ⊕○○○  |
| Heiwe (2014)     | RCT            | HD           | 12(385) | Mixed         | Mixed         | SMD:-0.56(-0.77,-0.35) | Moderate    | <0.001 | 0.0%           | ⊕○○○  |
| Matsuzawa (2017) | RCT            | HD           | 9(281)  | Mixed         | Mixed         | SMD:0.94(0.67,1.21)    | Large       | <0.001 | 10.0%          | ⊕○○○  |
| Neto (2018)      | RCT            | HD           | 9(250)  | Mixed         | Intradialytic | SMD:0.61(0.39,0.83)    | Moderate    | <0.001 | 58.9%          | ⊕○○○  |
| Ju (2020)        | RCT            | Mixed        | 3(115)  | Mixed         | -             | SMD:0.52(0.14,0.89)    | Moderate    | 0.007  | 0.0%           | ⊕○○○  |

Abbreviation: RCT = randomized controlled trial; RT = resistance training; SMD = standardized mean difference; MD = mean difference; HD = hemodialysis; GRADE = Grading of Recommendations Assessment, Development, and Evaluation.

\*Number of included studies and corresponding sample size.

Mixed means aerobic exercise combined with resistance training.

Table 4 Summary of the effect of exercise on muscle endurance in CKD patients

| Author (year)   | Design         | Stage of CKD | k (n)* | Exercise type | Mode          | Outcome          | SMD or MD (95% CI)     | Effect size | P      | I <sup>2</sup> | GRADE |
|-----------------|----------------|--------------|--------|---------------|---------------|------------------|------------------------|-------------|--------|----------------|-------|
| Lu (2019)       | RCT            | Dialysis     | 3(193) | Mixed         | Mixed         | STS 10           | MD:-4.69(-9.01,-0.38)  | -           | 0.028  | 72.2%          | ⊕○○○  |
| Bogataj (2020)  | RCT            | HD           | 5(461) | Mixed         | -             | STS 10           | SMD:-0.55(-1.00,-0.09) | Moderate    | 0.019  | 71.6%          | ⊕○○○  |
| Lu (2019)       | RCT            | Dialysis     | 6(240) | Mixed         | Mixed         | STS 30           | SMD:0.43(0.17,0.69)    | Small       | 0.001  | 2.0%           | ⊕⊕○○  |
| Zhang (2021)    | RCT            | HD           | 5(164) | RT            | Intradialytic | STS 30           | SMD:0.42(0.11,0.74)    | Small       | 0.008  | 0.0%           | ⊕○○○  |
| Sheng (2014)    | RCT            | HD           | 3(106) | Mixed         | Intradialytic | STS 60           | SMD:0.71(0.31,1.12)    | Moderate    | <0.001 | 0.0%           | ⊕○○○  |
| Pei (2019)      | RCT/quasi-RCT  | Mixed        | 5(445) | AE            | -             | STS 60           | MD:2.08(1.1,3.05)      | -           | 0.98   | 82.0%          | ⊕○○○  |
| Nakamura (2020) | RCT/cross-over | Predialysis  | 3(170) | Mixed         | -             | TUGT             | SMD:-0.42(-0.73,-0.11) | Small       | 0.007  | 0.0%           | ⊕○○○  |
| Heiwe (2011)    | RCT/quasi-RCT  | Mixed        | 7(191) | Mixed         | -             | Walking capacity | SMD:-0.48(-0.79,-0.17) | Small       | 0.003  | 2.0%           | ⊕○○○  |
| Heiwe (2014)    | RCT            | HD           | 7(174) | Mixed         | Mixed         | Walking capacity | SMD:-0.33(-0.67,0.01)  | Small       | 0.06   | 16.0%          | ⊕⊕⊕○  |

Abbreviation: RCT = randomized controlled trial; AE = aerobic exercise; RT = resistance training; STS 10 = sit to stand 10 test; STS 30 = sit to stand 30 test; STS 60 = sit to stand 60 test; TUGT = timed up and go test; SMD = standardized mean difference; MD = mean difference; HD = hemodialysis; GRADE = Grading of Recommendations Assessment, Development, and Evaluation.

\*Number of included studies and corresponding sample size.

Mixed means aerobic exercise combined with resistance training.

**Table 5 Summary of the effect of exercise on body composition in CKD patients**

| Author (year)   | Design | Stage of CKD | k (n)*  | Exercise type | Mode | SMD (95% CI)           | Effect size | <i>P</i> | <i>I</i> <sup>2</sup> | GRADE |
|-----------------|--------|--------------|---------|---------------|------|------------------------|-------------|----------|-----------------------|-------|
| Chen (2019)     | RCT    | KTRs         | 4(166)  | Mixed         | -    | SMD:0.02(-0.28,0.33)   | Small       | 0.89     | 0.0%                  | ⊕○○○  |
| Yamamoto (2021) | RCT    | Predialysis  | 10(414) | AE            | -    | SMD:-0.19(-0.38,-0.00) | Small       | 0.026    | 0.0%                  | ⊕⊕○○  |
| Zhang (2019)    | RCT    | Predialysis  | 13(466) | Mixed         | -    | SMD:-0.21(-0.39,-0.03) | Small       | 0.02     | 0.0%                  | ⊕⊕⊕○  |
| Wyngaert (2018) | RCT    | Predialysis  | 9(294)  | AE            | -    | SMD:-0.36(-0.60,-0.13) | Small       | 0.002    | 48.0%                 | ⊕⊕○○  |

Abbreviation: RCT = randomized controlled trial; AE = aerobic exercise; SMD = standardized mean difference; KTRs = kidney transplant recipients; GRADE = Grading of Recommendations Assessment, Development, and Evaluation.

\*Number of included studies and corresponding sample size.

Mixed means aerobic exercise combined with resistance training.

Table 6 Summary of the effect of exercise on dialysis-related symptoms in CKD patients

| Author (year)   | Design        | Stage of CKD | k (n)*  | Exercise type | Mode          | Outcomes | SMD or MD(95% CI)      | Effect size | P      | I <sup>2</sup> | GRADE |
|-----------------|---------------|--------------|---------|---------------|---------------|----------|------------------------|-------------|--------|----------------|-------|
| Ferreira (2019) | RCT/quasi-RCT | HD           | 10(346) | AE            | Intradialytic | Kt/V     | SMD:2.21(1.17,3.25)    | Large       | <0.001 | 92.0%          | ⊕○○○  |
| Pu (2019)       | RCT           | HD           | 10(301) | Mixed         | Intradialytic | Kt/V     | SMD:0.29(0.06,0.52)    | Small       | 0.01   | 0.0%           | ⊕○○○  |
| Huang (2019)    | RCT           | HD           | 8(257)  | Mixed         | Mixed         | Kt/V     | SMD:0.19(-0.06,0.43)   | Small       | 0.14   | 0.0%           | ⊕○○○  |
| Sheng (2014)    | RCT           | HD           | 7(233)  | Mixed         | Intradialytic | Kt/V     | SMD:0.27(0.01,0.53)    | Small       | 0.04   | 0.0%           | ⊕○○○  |
| Ferrari (2019)  | RCT           | HD           | 12(370) | AE            | Intradialytic | Kt/V     | MD:0.08(0.0,0.15)      | -           | 0.04   | 56.0%          | ⊕○○○  |
| Ferrari (2019)  | RCT           | HD           | 6(220)  | RT            | Intradialytic | Kt/V     | MD:0.10(0.0,0.2)       | -           | 0.06   | 6.0%           | ⊕○○○  |
| Song (2018)     | RCT           | HD           | 4(141)  | Mixed         | Mixed         | RLS      | SMD:-1.79(-2.21,-1.37) | Large       | <0.001 | 87.0%          | ⊕○○○  |
| Song (2018)     | RCT           | HD           | 3(139)  | Mixed         | Mixed         | Fatigue  | SMD:-0.85(-1.20,-0.50) | Large       | <0.001 | 0.0%           | ⊕○○○  |
| Zhao (2019)     | RCT           | Dialysis     | 3(141)  | Mixed         | -             | Fatigue  | SMD:-0.97(-1.32,-0.62) | Large       | <0.001 | 47.0%          | ⊕⊕○○  |

Abbreviation: RCT = randomized controlled trial; AE = aerobic exercise; RT = resistance training; SMD = standardized mean difference; MD = mean difference; HD = hemodialysis; KTRs = kidney transplant recipients; RLS = Restless Legs Syndrome; GRADE = Grading of Recommendations Assessment, Development, and Evaluation.

\*Number of included studies and corresponding sample size.  
Mixed means aerobic exercise combined with resistance training.



**Table 7 Summary of the effect of exercise on health-related quality of lives in CKD patients**

| Author (year)    | Design | Stage of CKD | k (n)*  | Exercise type | Mode          | Outcomes | SMD or MD (95% CI)   | Effect size | <i>P</i> | <i>I</i> <sup>2</sup> | GRADE |
|------------------|--------|--------------|---------|---------------|---------------|----------|----------------------|-------------|----------|-----------------------|-------|
| Salhab (2019)    | RCT    | HD           | 5(282)  | AE            | Intradialytic | PCS      | SMD:1.82(-0.92,4.55) | Large       | 0.19     | 98.0%                 | ⊕○○○  |
| Chung (2016)     | RCT    | HD           | 6(229)  | Mixed         | Intradialytic | PCS      | SMD:0.46(0.20,0.73)  | Small       | <0.001   | 1.90%                 | ⊕⊕○○  |
| Zhang (2021)     | RCT    | HD           | 7(297)  | RT            | Intradialytic | PCS      | SMD:0.23(-0.00,0.46) | Small       | 0.055    | 0.0%                  | ⊕⊕○○  |
| Pu (2019)        | RCT    | HD           | 10(320) | Mixed         | Intradialytic | PCS      | SMD:0.57(0.14,1.01)  | Moderate    | 0.01     | 70.0%                 | ⊕○○○  |
| Zhao (2019)      | RCT    | Dialysis     | 5(186)  | Mixed         | -             | PCS      | SMD:0.31(0.02,0.61)  | Small       | 0.04     | 46.0%                 | ⊕⊕○○  |
| Huang (2019)     | RCT    | HD           | 7(263)  | Mixed         | Mixed         | PCS      | SMD:0.34(0.09,0.59)  | Small       | 0.007    | 27.0%                 | ⊕⊕○○  |
| Matsuzawa (2017) | RCT    | HD           | 9(264)  | Mixed         | Mixed         | PCS      | SMD:0.53(0.52,0.82)  | Moderate    | <0.001   | 19.0%                 | ⊕○○○  |
| Sheng (2014)     | RCT    | HD           | 7(256)  | Mixed         | Intradialytic | PCS      | SMD:0.30(0.05,0.55)  | Small       | 0.02     | 39.5%                 | ⊕○○○  |
| Neto (2018)      | RCT    | HD           | 7(187)  | Mixed         | Intradialytic | PCS      | SMD:0.50(-0.19,1.18) | Moderate    | 0.16     | 62.0%                 | ⊕○○○  |
| Salhab (2019)    | RCT    | HD           | 5(282)  | AE            | Intradialytic | MCS      | SMD:1.02(0.31,1.73)  | Large       | 0.005    | 75.0%                 | ⊕○○○  |
| Chung (2016)     | RCT    | HD           | 5(193)  | Mixed         | Intradialytic | MCS      | SMD:0.23(-0.05,0.52) | Small       | 0.109    | 0.0%                  | ⊕⊕○○  |
| Zhang (2021)     | RCT    | HD           | 7(297)  | RT            | Intradialytic | MCS      | SMD:0.13(-0.10,0.36) | Small       | 0.082    | 46.5%                 | ⊕⊕○○  |
| Pu (2019)        | RCT    | HD           | 8(219)  | Mixed         | Intradialytic | MCS      | SMD:0.19(-0.09,0.46) | Small       | 0.18     | 30.0%                 | ⊕⊕○○  |
| Zhao (2019)      | RCT    | Dialysis     | 5(186)  | Mixed         | -             | MCS      | SMD:0.30(-0.20,0.80) | Small       | 0.24     | 64.0%                 | ⊕○○○  |
| Huang (2019)     | RCT    | HD           | 7(263)  | Mixed         | Mixed         | MCS      | SMD:0.27(0.02,0.51)  | Small       | 0.03     | 0.0%                  | ⊕⊕○○  |
| Matsuzawa (2017) | RCT    | HD           | 8(228)  | Mixed         | Mixed         | MCS      | SMD:0.14(-0.15,0.42) | Small       | 0.34     | 10.0%                 | ⊕○○○  |
| Sheng (2014)     | RCT    | HD           | 5(167)  | Mixed         | Intradialytic | MCS      | SMD:0.14(-0.16,0.43) | Small       | 0.37     | 14.8%                 | ⊕○○○  |
| Neto (2018)      | RCT    | HD           | 7(185)  | Mixed         | Intradialytic | MCS      | SMD:0.39(-0.19,0.98) | Small       | 0.19     | 50.0%                 | ⊕○○○  |

|               |               |             |         |       |   |                                   |                       |          |       |       |      |    |    |    |    |    |    |    |    |    |    |    |    |    |    |    |    |    |    |    |    |    |    |    |    |    |    |    |    |    |    |    |    |    |    |
|---------------|---------------|-------------|---------|-------|---|-----------------------------------|-----------------------|----------|-------|-------|------|----|----|----|----|----|----|----|----|----|----|----|----|----|----|----|----|----|----|----|----|----|----|----|----|----|----|----|----|----|----|----|----|----|----|
| 1             | 2             | 3           | 4       | 5     | 6 | 7                                 | 8                     | 9        | 10    | 11    | 12   | 13 | 14 | 15 | 16 | 17 | 18 | 19 | 20 | 21 | 22 | 23 | 24 | 25 | 26 | 27 | 28 | 29 | 30 | 31 | 32 | 33 | 34 | 35 | 36 | 37 | 38 | 39 | 40 | 41 | 42 | 43 | 44 | 45 | 46 |
| Pei (2019)    | RCT/quasi-RCT | Mixed       | 6(522)  | AE    | - | Physical function (SF-36)         | MD:8.36(-1.24,17.95)  | -        | 0.09  | 76.0% | ⊕○○○ |    |    |    |    |    |    |    |    |    |    |    |    |    |    |    |    |    |    |    |    |    |    |    |    |    |    |    |    |    |    |    |    |    |    |
| Pei (2019)    | RCT/quasi-RCT | Mixed       | 7(562)  | AE    | - | Physical role (SF-36)             | MD:14.65(1.47,27.84)  | -        | 0.03  | 78.0% | ⊕○○○ |    |    |    |    |    |    |    |    |    |    |    |    |    |    |    |    |    |    |    |    |    |    |    |    |    |    |    |    |    |    |    |    |    |    |
| Pei (2019)    | RCT/quasi-RCT | Mixed       | 6(447)  | AE    | - | Social function (SF-36)           | MD:8.24(-1.09,17.58)  | -        | 0.08  | 85.0% | ⊕○○○ |    |    |    |    |    |    |    |    |    |    |    |    |    |    |    |    |    |    |    |    |    |    |    |    |    |    |    |    |    |    |    |    |    |    |
| Pei (2019)    | RCT/quasi-RCT | Mixed       | 6(513)  | AE    | - | Pain (SF-36)                      | MD:5.94(1.65,10.23)   | -        | 0.007 | 49.0% | ⊕○○○ |    |    |    |    |    |    |    |    |    |    |    |    |    |    |    |    |    |    |    |    |    |    |    |    |    |    |    |    |    |    |    |    |    |    |
| Pei (2019)    | RCT/quasi-RCT | Mixed       | 7(562)  | AE    | - | General health (SF-36)            | MD:8.90(2.48,15.32)   | -        | 0.007 | 71.0% | ⊕○○○ |    |    |    |    |    |    |    |    |    |    |    |    |    |    |    |    |    |    |    |    |    |    |    |    |    |    |    |    |    |    |    |    |    |    |
| Pei (2019)    | RCT/quasi-RCT | Mixed       | 6(542)  | AE    | - | Mental health (SF-36)             | MD:7.30(-0.94,15.54)  | -        | 0.08  | 84.0% | ⊕○○○ |    |    |    |    |    |    |    |    |    |    |    |    |    |    |    |    |    |    |    |    |    |    |    |    |    |    |    |    |    |    |    |    |    |    |
| Cheema (2014) | RCT           | Predialysis | 6 (223) | RT    | - | HRQOL                             | SMD:0.83(0.51,1.16)   | Large    | 0.226 | 27.8% | ⊕⊕○○ |    |    |    |    |    |    |    |    |    |    |    |    |    |    |    |    |    |    |    |    |    |    |    |    |    |    |    |    |    |    |    |    |    |    |
| Oguchi (2018) | RCT           | KTRs        | 4(179)  | Mixed | - | HRQOL                             | SMD:0.54(0.02,1.07)   | Moderate | 0.04  | 58.0% | ⊕○○○ |    |    |    |    |    |    |    |    |    |    |    |    |    |    |    |    |    |    |    |    |    |    |    |    |    |    |    |    |    |    |    |    |    |    |
| Ju (2020)     | RCT           | Mixed       | 3 (387) | Mixed | - | Symptom/problem (KDQOL)           | SMD:1.92(-1.06,4.90)  | Large    | 0.21  | 99.0% | ⊕○○○ |    |    |    |    |    |    |    |    |    |    |    |    |    |    |    |    |    |    |    |    |    |    |    |    |    |    |    |    |    |    |    |    |    |    |
| Ju (2020)     | RCT           | Mixed       | 3 (387) | Mixed | - | Effects of kidney disease (KDQOL) | SMD:-3.69(-8.56,1.19) | Large    | 0.14  | 99.0% | ⊕○○○ |    |    |    |    |    |    |    |    |    |    |    |    |    |    |    |    |    |    |    |    |    |    |    |    |    |    |    |    |    |    |    |    |    |    |
| Ju (2020)     | RCT           | Mixed       | 3 (387) | Mixed | - | Burden of kidney disease (KDQOL)  | SMD:1.04 (-0.75,2.82) | Large    | 0.26  | 98.0% | ⊕○○○ |    |    |    |    |    |    |    |    |    |    |    |    |    |    |    |    |    |    |    |    |    |    |    |    |    |    |    |    |    |    |    |    |    |    |

Abbreviation: RCT = randomized controlled trial; AE = aerobic exercise; RT = resistance training; COM = combine; HRQOL = health-related quality of life; PCS = physical component summary; MCS = mental component summary; SMD = standardized mean difference; MD = mean difference; HD = hemodialysis; KTRs = kidney transplant recipients; SF-36 = Short-Form Health Survey-36; KDQOL = kidney disease quality of life; GRADE = Grading of Recommendations Assessment, Development, and Evaluation.

\*Number of included studies and corresponding sample size.  
 Mixed means aerobic exercise combined with resistance training.

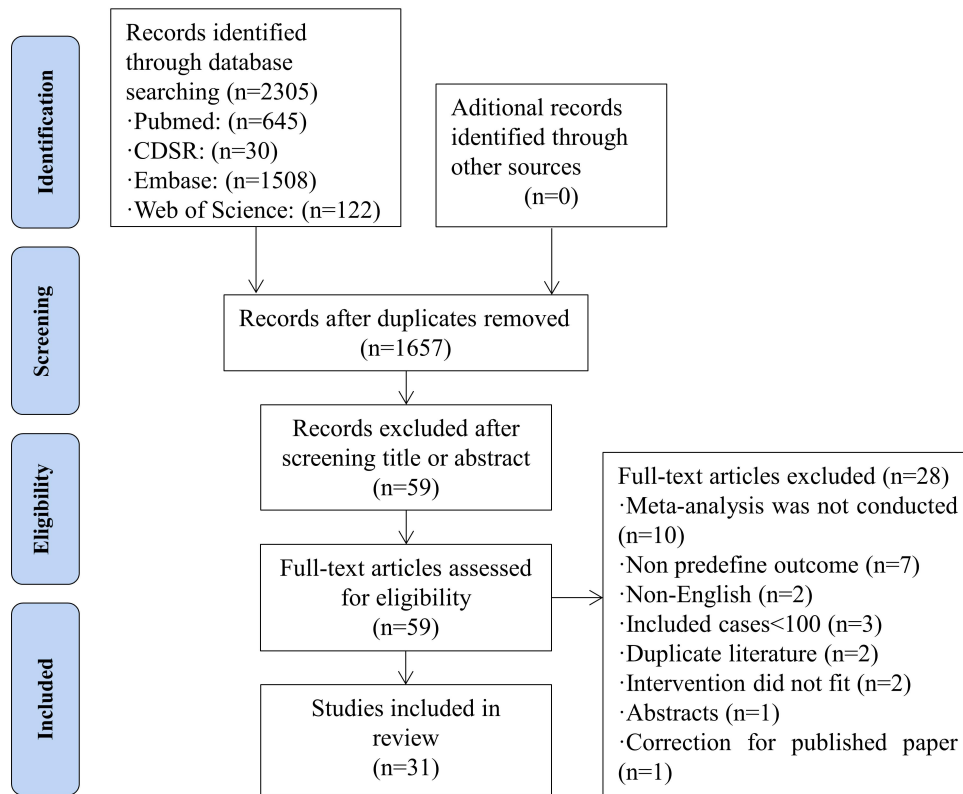

**Figures 1 Flowchart of literature screening.**

CDSR = Cochrane Database of Systemic Review

**Supplementary Table S1 The detailed search strategy**

| Databases | #  | Search strategy                                                                                                                                                                        |
|-----------|----|----------------------------------------------------------------------------------------------------------------------------------------------------------------------------------------|
| Pubmed    | 1  | "renal insufficiency, chronic"[MeSH Terms]                                                                                                                                             |
|           | 2  | "chronic renal insufficiency"[Title/Abstract] or "chronic kidney insufficiency"[Title/Abstract] or "chronic kidney disease"[Title/Abstract] or "chronic renal disease"[Title/Abstract] |
|           | 3  | "CKD"[Title/Abstract] or "CKF"[Title/Abstract] or "CRD"[Title/Abstract] or "CRF"[Title/Abstract]                                                                                       |
|           | 4  | "end-stage kidney"[Title/Abstract] or "end-stage renal"[Title/Abstract] or "endstage kidney"[Title/Abstract] or "endstage renal"[Title/Abstract]                                       |
|           | 5  | "ESRD"[Title/Abstract] or "ESRF"[Title/Abstract] or "ESKD"[Title/Abstract] or "ESKF"[Title/Abstract]                                                                                   |
|           | 6  | "Renal Replacement Therapy"[MeSH Terms]                                                                                                                                                |
|           | 7  | "dialysis"[Title/Abstract]                                                                                                                                                             |
|           | 8  | "hemodialysis"[Title/Abstract] or "haemodialysis"[Title/Abstract] or "hemodiafiltration"[Title/Abstract] or "haemodiafiltration"[Title/Abstract] or "HD"[Title/Abstract]               |
|           | 9  | "PD"[Title/Abstract]                                                                                                                                                                   |
|           | 10 | "renal transplantation"[Title/Abstract] or "kidney grafting"[Title/Abstract] or "kidney transplantation"[Title/Abstract]                                                               |
|           | 11 | "KTRs"[Title/Abstract]                                                                                                                                                                 |
|           | 12 | #1 or #2 or #3 or #4 or #5 or #6 or #7 or #8 or #9 or #10 or #11                                                                                                                       |
|           | 13 | "Exercise"[MeSH Terms]                                                                                                                                                                 |
|           | 14 | "Exercise Movement Techniques"[MeSH Terms]                                                                                                                                             |
|           | 15 | "Exercise Therapy"[MeSH Terms]                                                                                                                                                         |
|           | 16 | "Sports"[MeSH Terms]                                                                                                                                                                   |
|           | 17 | "train"[Title/Abstract] or "physical activity"[Title/Abstract] or "exercise"[Title/Abstract]                                                                                           |
|           | 18 | #13 or #14 or #15 or #16 or #17                                                                                                                                                        |
|           | 19 | "Systematic Review"[Publication Type] or "Systematic Reviews as Topic"[MeSH Terms]                                                                                                     |
|           | 20 | "meta analysis"[Publication Type] or "Meta-Analysis as Topic"[MeSH Terms]                                                                                                              |

|      |    |                                                                                                                                    |
|------|----|------------------------------------------------------------------------------------------------------------------------------------|
|      | 21 | "Systematic Review"[Title/Abstract] or "system review"[Title/Abstract] or "data pooling"[Title/Abstract] or "meta"[Title/Abstract] |
|      | 22 | #19 or #20 or #21                                                                                                                  |
|      | 23 | #12 and #18 and #22                                                                                                                |
| CDSR | 1  | MeSH descriptor: [Kidney Diseases] explode all trees                                                                               |
|      | 2  | ("chronic kidney disease") or ("chronic renal disease") or ("chronic kidney failure") or ("chronic renal failure"):ti,ab,kw        |
|      | 3  | (CKF or CKD or CRF or CRD):ti,ab,kw                                                                                                |
|      | 4  | ("end-stage kidney") or ("end-stage renal") or ("endstage kidney") or ("endstage renal"):ti,ab,kw                                  |
|      | 5  | ESRD or ESRF or ESKD or ESKF:ti,ab,kw                                                                                              |
|      | 6  | MeSH descriptor: [Renal Replacement Therapy] explode all trees                                                                     |
|      | 7  | dialysis:ti,ab,kw                                                                                                                  |
|      | 8  | (hemodialysis or haemodialysis or hemodiafiltration or haemodiafiltration or HD):ti,ab,kw                                          |
|      | 9  | PD:ti,ab,kw                                                                                                                        |
|      | 10 | ("renal transplantation") or ("kidney grafting") or ("kidney transplantation"):ti,ab,kw                                            |
|      | 11 | KTRs:ti,ab,kw                                                                                                                      |
|      | 12 | #1 or #2 or #3 or #4 or #5 or #6 or #7 or #8 or #9 or #10 or #11                                                                   |
|      | 13 | MeSH descriptor: [Exercise] explode all trees                                                                                      |
|      | 14 | MeSH descriptor: [Exercise Movement Techniques] explode all trees                                                                  |
|      | 15 | MeSH descriptor: [Exercise Therapy] explode all trees                                                                              |
|      | 16 | MeSH descriptor: [Sports] explode all trees                                                                                        |
|      | 17 | (train or ("physical activity") or exercise):ti,ab,kw                                                                              |
|      | 18 | #13 or #14 or #15 or #16 or #17                                                                                                    |
|      | 19 | MeSH descriptor: [Meta-Analysis as Topic] explode all trees                                                                        |
|      | 20 | MeSH descriptor: [Systematic Reviews as Topic] explode all trees                                                                   |
|      | 21 | ("systematic review") or ("system review") or ("data pooling") or (meta):ti,ab,kw                                                  |
|      | 22 | #19 or #20 or #21                                                                                                                  |

|                |    |                                                                                                                                              |
|----------------|----|----------------------------------------------------------------------------------------------------------------------------------------------|
|                | 23 | #12 and #18 and #22                                                                                                                          |
| Embase         | 1  | 'kidney disease'/exp                                                                                                                         |
|                | 2  | ('chronic kidney disease' or 'chronic renal disease' or 'chronic kidney failure' or 'chronic renal failure'):ti,ab,kw                        |
|                | 3  | (CKF or CKD or CRF or CRD):ti,ab,kw                                                                                                          |
|                | 4  | ('end-stage kidney' or 'end-stage renal' or 'endstage kidney' or 'endstage renal'):ti,ab,kw                                                  |
|                | 5  | (ESRD or ESRF or ESKD or ESKF):ti,ab,kw                                                                                                      |
|                | 6  | 'renal replacement therapy'/exp                                                                                                              |
|                | 7  | 'dialysis':ti,ab,kw                                                                                                                          |
|                | 8  | (hemodialysis or haemodialysis or hemofiltration or haemofiltration or hemodiafiltration or haemodiafiltration or HD):ti,ab,kw               |
|                | 9  | PD:ti,ab,kw                                                                                                                                  |
|                | 10 | ('renal transplantation' or 'kidney grafting' or 'kidney transplantation'):ti,ab,kw                                                          |
|                | 11 | KTRs:ti,ab,kw                                                                                                                                |
|                | 12 | #1 or #2 or #3 or #4 or #5 or #6 or #7 or #8 or #9 or #10 or #11                                                                             |
|                | 13 | 'exercise'/exp                                                                                                                               |
|                | 14 | 'physical activity'/exp                                                                                                                      |
|                | 15 | 'sport'/exp                                                                                                                                  |
|                | 16 | (train or 'physical activity' or exercise):ti,ab,kw                                                                                          |
|                | 17 | #13 or #14 or #15 or #16                                                                                                                     |
|                | 18 | 'systematic review (topic)'/exp or 'systematic review'/exp                                                                                   |
|                | 19 | 'meta analysis (topic)'/exp or 'meta analysis'/exp                                                                                           |
|                | 20 | ('systematic review' or 'system review' or 'data pooling' or meta):ti,ab,kw                                                                  |
|                | 21 | #18 or #19 or #20                                                                                                                            |
|                | 22 | #12 and #17 and #21                                                                                                                          |
| Web of Science | 1  | TS: ("chronic kidney disease" or "chronic renal disease" or "chronic kidney failure" or "chronic renal failure" or CKD or CRD or CKF or CRF) |

|   |                                                                                                                                                                            |
|---|----------------------------------------------------------------------------------------------------------------------------------------------------------------------------|
| 2 | TS: ("end-stage kidney" or "end-stage renal" or "endstage kidney" or "endstage renal" or ESKD or ESKF or ESRD or ESRF)                                                     |
| 3 | TS: ("renal replacement therapy" or dialysis or hemodialysis or haemodialysis or hemofiltration or haemofiltration or hemodiafiltration or haemodiafiltration or HD or PD) |
| 4 | TS: ("renal transplantation" or "kidney grafting" or "kidney transplantation" or KTRs)                                                                                     |
| 5 | #1 or #2 or #3 or #4                                                                                                                                                       |
| 6 | TS: (train or exercise or "physical activity")                                                                                                                             |
| 7 | TS: ("systematic review" or "system review" or "data pooling" or meta)                                                                                                     |
| 8 | #1 and #2 and #3 and #4 and #5                                                                                                                                             |

**Supplementary Table S2** The characteristic of excluded studies

| Studies                 | Reasons for exclusion           |
|-------------------------|---------------------------------|
| Nantakool et al (2020)  | Non predefine outcome           |
| Sawant et al (2014)     | Non predefine outcome           |
| Smart et al (2014)      | Duplicate literature            |
| Barcellos et al (2015)  | Meta-analysis was not conducted |
| Yang et al (2020)       | Non predefine outcome           |
| Young et al (2018)      | Included cases<100              |
| Phan et al (2015)       | Duplicate literature            |
| Molsted et al (2019)    | Included cases<100              |
| Segura et al (2010)     | Non-English                     |
| Ferreira et al (2020)   | Non predefine outcome           |
| Koufaki et al (2013)    | Meta-analysis was not conducted |
| Smart et al (2012)      | Abstracts                       |
| Howden et al (2012)     | Meta-analysis was not conducted |
| Calella et al (2019)    | Meta-analysis was not conducted |
| Singh et al (2005)      | Meta-analysis was not conducted |
| Cardoso et al (2020)    | Non predefine outcome           |
| Villanego et al (2020)  | Non-English                     |
| Medeiros et al (2017)   | Intervention did not fit        |
| Macdonald et al (2009)  | Meta-analysis was not conducted |
| Wen et al (2019)        | Non predefine outcome           |
| Yang et al (2015)       | Non predefine outcome           |
| Thangarasa et al (2018) | Included cases<100              |
| Chan et al (2016)       | Meta-analysis was not conducted |



|                        |                                 |
|------------------------|---------------------------------|
| Johansen et al (2010)  | Intervention did not fit        |
| Thompson et al (2020)  | Correction for published paper  |
| Bakaloudi et al (2020) | Meta-analysis was not conducted |
| Kirkman et al (2019)   | Meta-analysis was not conducted |
| Afsar et al (2018)     | Meta-analysis was not conducted |

For peer review only

Supplementary Table S3 The basic characteristics of the included meta-analyses

| Author (year)   | Design                | Stage of CKD         | k (n)*  | Exercise type | Mode          | Outcomes                  | SMD or MD(95% CI)      | Effect size | <i>P</i> | <i>I</i> <sup>2</sup> | GRADE    |
|-----------------|-----------------------|----------------------|---------|---------------|---------------|---------------------------|------------------------|-------------|----------|-----------------------|----------|
| Pei (2019)      | RCT/quasi-RCT         | Mixed                | 17(464) | AE            | -             | VO <sub>2peak</sub>       | MD:2.08 (1.1,3.05)     | -           | <0.001   | 25.0%                 | Low      |
|                 |                       |                      | 5 (445) |               |               | STS 60                    | MD:2.08 (1.1,3.05)     | -           | 0.98     | 82.0%                 | Very low |
|                 |                       |                      | 8 (496) |               |               | 6MWT                      | MD:0.04 (-0.52, 0.59)  | -           | 0.9      | 86.0%                 | Very low |
|                 |                       |                      | 12(514) |               |               | SBP                       | MD:-2.91 (-6.68, 0.87) | -           | 0.13     | 40.0%                 | Low      |
|                 |                       |                      | 12(514) |               |               | DBP                       | MD:-1.11 (-3.41, 1.20) | -           | 0.35     | 0.0%                  | Low      |
|                 |                       |                      | 6(522)  |               |               | Physical function (SF-36) | MD:8.36(-1.24,17.95)   | -           | 0.09     | 76.0%                 | Very low |
|                 |                       |                      | 7(562)  |               |               | Physical role (SF-36)     | MD:14.65(1.47,27.84)   | -           | 0.03     | 78.0%                 | Very low |
|                 |                       |                      | 6(447)  |               |               | Social function (SF-36)   | MD:8.24(-1.09,17.58)   | -           | 0.08     | 85.0%                 | Very low |
|                 |                       |                      | 6(513)  |               |               | Pain (SF-36)              | MD:5.94(1.65,10.23)    | -           | 0.007    | 49.0%                 | Very low |
|                 |                       |                      | 7(562)  |               |               | General health (SF-36)    | MD:8.90(2.48,15.32)    | -           | 0.007    | 71.0%                 | Very low |
| 6(542)          | Mental health (SF-36) | MD:7.30(-0.94,15.54) | -       | 0.08          | 84.0%         | Very low                  |                        |             |          |                       |          |
| Ferreira (2019) | RCT/quasi-RCT         | HD                   | 10(346) | AE            | Intradialytic | Kt/V                      | SMD:2.21(1.17,3.25)    | Large       | <0.001   | 92.0%                 | Very low |
| Cheema (2014)   | RCT                   | Predialysis          | 7(249)  | RT            | -             | Muscle Strength           | SMD:1.15 (0.80-1.49)   | Large       | 0.161    | 35.0%                 | Low      |
|                 |                       |                      | 6(223)  |               |               | HRQoL                     | SMD:0.83(0.51-1.16)    | Large       | 0.226    | 27.8%                 | Low      |
| Wu (2020)       | RCT/quasi-RCT         | Predialysis          | 3(204)  | AE+RT         | -             | SBP                       | SMD:-0.19(-0.46,0.08)  | Small       | 0.16     | 50.0%                 | Very low |
|                 |                       |                      | 4(194)  |               |               | DBP                       | SMD:-0.47(-1.10,0.15)  | Small       | 0.14     | 70.0%                 | Very low |

|                    |                |             |         |       |               |                     |                        |          |        |       |          |
|--------------------|----------------|-------------|---------|-------|---------------|---------------------|------------------------|----------|--------|-------|----------|
| Nakamura<br>(2020) | RCT/cross-over | Predialysis | 10(401) | Mixed | -             | VO <sub>2peak</sub> | SMD:0.88(0.53,1.23)    | Large    | <0.001 | 56.0% | Low      |
|                    |                |             | 4(119)  |       |               | Muscle Strength     | SMD:0.35(-0.03,0.73)   | Small    | 0.07   | 7.0%  | Very low |
|                    |                |             | 5(392)  |       |               | 6MWT                | SMD:1.04(0.17,1.90)    | Large    | 0.02   | 92.0% | Very low |
|                    |                |             | 3(170)  |       |               | TUGT                | SMD:-0.42(-0.73,-0.11) | Small    | 0.007  | 0.0%  | Very low |
| Lu<br>(2019)       | RCT            | Dialysis    | 11(300) | Mixed | Mixed         | 6MWT                | MD:67.6(49.93,85.26)   | -        | <0.001 | 30.6% | Moderate |
|                    |                |             | 3(193)  |       |               | STS 10              | MD:-4.69(-9.01,-0.38)  | -        | 0.028  | 72.2% | Very low |
|                    |                |             | 5(234)  |       |               | HGS                 | MD:5.35(3.34,7.37)     | -        | <0.001 | 0.3%  | Low      |
|                    |                |             | 7(224)  |       |               | Muscle strength     | MD:3.67(1.37,5.97)     | -        | 0.020  | 38.6% | Low      |
|                    |                |             | 6(240)  |       |               | STS 30              | MD:2.43(0.91,3.96)     | -        | 0.002  | 21.2% | Low      |
| Chen<br>(2019)     | RCT            | KTRs        | 5(198)  | Mixed | -             | SBP                 | SMD:0.18(-0.10,0.46)   | Small    | 0.21   | 0.0%  | Very low |
|                    |                |             | 5(198)  |       |               | DBP                 | SMD:0.04(-0.45,0.52)   | Small    | 0.89   | 59.0% | Very low |
|                    |                |             | 4(166)  |       |               | BMI                 | SMD:0.02(-0.28,0.33)   | Small    | 0.89   | 0.0%  | Very low |
|                    |                |             | 6(202)  |       |               | VO <sub>2peak</sub> | SMD:0.33(-0.02,0.69)   | Small    | 0.06   | 27.0% | Very low |
| Song<br>(2018)     | RCT            | HD          | 4(141)  | Mixed | Mixed         | RLS                 | SMD:-1.79(-2.21,-1.37) | Large    | <0.001 | 87.0% | Very low |
|                    |                |             | 3(139)  |       |               | Fatigue             | SMD:-0.85(-1.20,-0.50) | Large    | <0.001 | 0.0%  | Very low |
| Salhab<br>(2019)   | RCT            | HD          | 5(282)  | AE    | Intradialytic | PCS                 | SMD:1.82(-0.92,4.55)   | Large    | 0.19   | 98.0% | Very low |
|                    |                |             | 5(282)  |       |               | MCS                 | SMD:1.02(0.31,1.73)    | Large    | 0.005  | 75.0% | Very low |
| Andrade<br>(2019)  | RCT            | HD          | 5(201)  | AE+RT | Intradialytic | VO <sub>2peak</sub> | SMD:1.01(0.71,1.30)    | Large    | <0.001 | 0.0%  | Low      |
| Chung<br>(2016)    | RCT            | HD          | 4(127)  | Mixed | Intradialytic | 6MWT                | SMD:0.44(0.09,0.80)    | Small    | 0.015  | 0.0%  | Low      |
|                    |                |             | 6(238)  |       |               | VO <sub>2peak</sub> | SMD:0.55(0.18,0.92)    | Moderate | 0.003  | 52.9% | Very low |
|                    |                |             | 6(229)  |       |               | PCS                 | SMD:0.46(0.20,0.73)    | Small    | <0.001 | 1.90% | Low      |
|                    |                |             | 5(193)  |       |               | MCS                 | SMD:0.23(-0.05,0.52)   | Small    | 0.109  | 0.0%  | Low      |
| Zhang<br>(2021)    | RCT            | HD          | 8(299)  | RT    | Intradialytic | 6MWT                | SMD:0.52(0.28,0.75)    | Moderate | <0.001 | 18.7% | Very low |
|                    |                |             | 5(164)  |       |               | STS 30              | SMD:0.42(0.11,0.74)    | Small    | 0.008  | 0.0%  | Very low |

|                 |     |             |         |       |               |                     |                        |          |        |       |          |
|-----------------|-----|-------------|---------|-------|---------------|---------------------|------------------------|----------|--------|-------|----------|
|                 |     |             | 6(300)  |       |               | HGS                 | SMD:0.35(0.12,0.58)    | Small    | 0.003  | 41.6% | Very low |
|                 |     |             | 7(297)  |       |               | PCS                 | SMD:0.23(-0.00,0.46)   | Small    | 0.055  | 0.0%  | Very low |
|                 |     |             | 7(297)  |       |               | MCS                 | SMD:0.13(-0.10,0.36)   | Small    | 0.082  | 46.5% | Very low |
| Pu (2019)       | RCT | HD          | 10(301) | Mixed | Intradialytic | Kt/V                | SMD:0.29(0.06,0.52)    | Small    | 0.01   | 0.0%  | Very low |
|                 |     |             | 10(400) |       |               | VO <sub>2peak</sub> | SMD:0.57(0.23,0.90)    | Moderate | <0.001 | 59.0% | Low      |
|                 |     |             | 7(219)  |       |               | 6MWT                | SMD:0.57(0.30,0.84)    | Moderate | <0.001 | 0.0%  | Low      |
|                 |     |             | 10(320) |       |               | PCS                 | SMD:0.57(0.14,1.01)    | Moderate | 0.01   | 70.0% | Very low |
|                 |     |             | 8(219)  |       |               | MCS                 | SMD:0.19(-0.09,0.46)   | Small    | 0.18   | 30.0% | Low      |
|                 |     |             | 7(287)  |       |               | SBP                 | SMD:-0.28(-0.52,-0.05) | Small    | 0.02   | 0.0%  | Very low |
|                 |     |             | 7(287)  |       |               | DBP                 | SMD:-0.32(-0.55,-0.08) | Small    | 0.008  | 42.0% | Very low |
| Yamamoto (2021) | RCT | Predialysis | 10(392) | AE    | -             | SBP                 | SMD:-0.75(-1.24,-0.26) | Moderate | 0.003  | 80.3% | Very low |
|                 |     |             | 10(365) |       |               | VO <sub>2peak</sub> | SMD:0.54(0.29,0.78)    | Moderate | <0.001 | 24.6% | Very low |
|                 |     |             | 10(414) |       |               | BMI                 | SMD:-0.19(-0.38,-0.00) | Small    | 0.026  | 0.0%  | Low      |
| Thompson (2019) | RCT | Predialysis | 10(335) | Mixed | -             | SBP                 | MD:-4.3(-9.0,0.4)      | -        | N.P.   | 50.4% | Very low |
|                 |     |             | 8(303)  |       |               | DBP                 | MD:-1.18(-4.76,2.40)   | -        | N.P.   | 60.5% | Very low |
| Yang (2017)     | RCT | Mixed       | 4(150)  | Mixed | -             | VO <sub>2peak</sub> | SMD:0.33(0.03,0.63)    | Small    | 0.003  | 47.0% | Low      |
| Clarkson (2019) | RCT | Dialysis    | 18(744) | Mixed | -             | 6MWT                | MD:33.64(23.74,43.54)  | -        | <0.001 | 0.0%  | Moderate |
| Zhao (2019)     | RCT | Dialysis    | 3(141)  | Mixed | -             | Fatigue             | SMD:-0.97(-1.32,-0.62) | Large    | <0.001 | 47.0% | Low      |
|                 |     |             | 5(186)  |       |               | PCS                 | SMD:0.31(0.02,0.61)    | Small    | 0.04   | 46.0% | Low      |
|                 |     |             | 5(186)  |       |               | MCS                 | SMD:0.30(-0.20,0.80)   | Small    | 0.24   | 64.0% | Very low |
| Zhang (2019)    | RCT | Predialysis | 14(463) | Mixed | -             | SBP                 | SMD:-0.41(-0.70,-0.11) | Small    | 0.007  | 55.0% | Moderate |
|                 |     |             | 12(399) |       |               | DBP                 | SMD:-0.31(-0.71,0.08)  | Small    | 0.12   | 70.0% | Low      |
|                 |     |             | 13(466) |       |               | BMI                 | SMD:-0.21(-0.39,-0.03) | Small    | 0.02   | 0.0%  | Moderate |

|                     |               |       |         |       |   |                     |                        |          |        |       |          |
|---------------------|---------------|-------|---------|-------|---|---------------------|------------------------|----------|--------|-------|----------|
| Huang<br>(2019)     | RCT           | HD    | 8(257)  | Mixed | - | Kt/V                | SMD:0.19(-0.06,0.43)   | Small    | 0.14   | 0.0%  | Very low |
|                     |               |       | 7(260)  |       |   | SBP                 | SMD:-0.17(-0.41,0.08)  | Small    | 0.18   | 8.0%  | Low      |
|                     |               |       | 7(260)  |       |   | DBP                 | SMD:-0.23(-0.69,0.24)  | Small    | 0.34   | 68.0% | Very low |
|                     |               |       | 7(205)  |       |   | 6MWT                | SMD:1.01(0.26,1.76)    | Large    | 0.008  | 83.0% | Very low |
|                     |               |       | 7(263)  |       |   | PCS                 | SMD:0.34(0.09,0.59)    | Small    | 0.007  | 27.0% | Low      |
|                     |               |       | 7(263)  |       |   | MCS                 | SMD:0.27(0.02,0.51)    | Small    | 0.03   | 0.0%  | Low      |
|                     |               |       | 10(371) |       |   | VO <sub>2peak</sub> | SMD:0.73(0.52,0.95)    | Moderate | <0.001 | 71.0% | Low      |
| Heiwe<br>(2011)     | RCT/quasi-RCT | Mixed | 24(847) | Mixed | - | Aerobic capacity    | SMD:-0.56(-0.70,-0.42) | Moderate | <0.001 | 12.0% | Moderate |
|                     |               |       | 9(358)  |       |   | Muscle strength     | SMD:-0.52(-0.73,-0.31) | Moderate | <0.001 | 0.0%  | Low      |
|                     |               |       | 7(191)  |       |   | Walking capacity    | SMD:-0.48(-0.79,-0.17) | Small    | 0.003  | 2.0%  | Low      |
|                     |               |       | 9(347)  |       |   | SBP                 | SMD:0.25(0.04,0.47)    | Small    | 0.02   | 0.0%  | Low      |
|                     |               |       | 11(419) |       |   | DBP                 | SMD:0.16(-0.04,0.36)   | Small    | 0.11   | 40.0% | High     |
| Heiwe<br>(2014)     | RCT           | HD    | 21(374) | Mixed | - | Aerobic capacity    | SMD:-0.80(-1.02,-0.58) | Large    | <0.001 | 0.0%  | Low      |
|                     |               |       | 10(212) |       |   | DBP                 | SMD:0.17(-0.16,0.49)   | Small    | 0.3    | 45.0% | Low      |
|                     |               |       | 10(312) |       |   | SBP                 | SMD:0.04(-0.4,0.41)    | Small    | 0.8    | 58.0% | Very low |
|                     |               |       | 10(385) |       |   | Muscle strength     | SMD:-0.56(-0.77,-0.35) | Moderate | <0.001 | 0.0%  | Very low |
|                     |               |       | 7(174)  |       |   | Walking capacity    | SMD:-0.33(-0.67,0.01)  | Small    | 0.06   | 16.0% | Low      |
| Matsuzawa<br>(2017) | RCT           | HD    | 18(582) | Mixed | - | VO <sub>2peak</sub> | SMD:0.62(0.38,0.87)    | Moderate | <0.001 | 49.0% | High     |
|                     |               |       | 10(326) |       |   | 6MWT                | SMD:0.58(0.24,0.93)    | Moderate | <0.001 | 53.0% | Low      |
|                     |               |       | 9(281)  |       |   | Muscle strength     | SMD:0.94(0.67,1.21)    | Large    | <0.001 | 10.0% | Very low |
|                     |               |       | 9(264)  |       |   | PCS                 | SMD:0.53(0.52,0.82)    | Moderate | <0.001 | 19.0% | Very low |
|                     |               |       | 8(228)  |       |   | MCS                 | SMD:0.14(-0.15,0.42)   | Small    | 0.34   | 10.0% | Very low |
| Smart<br>(2011)     | RCT           | HD    | 8(365)  | Mixed | - | VO <sub>2peak</sub> | SMD:0.75(0.39,1.11)    | Moderate | <0.001 | 60.0% | Low      |
| Bogataj             | RCT           | HD    | 19(571) | Mixed | - | 6MWT                | SMD:0.44(0.21,0.67)    | Small    | <0.001 | 49.6% | Very low |

|                 |     |             |         |       |               |                     |                        |          |        |       |          |
|-----------------|-----|-------------|---------|-------|---------------|---------------------|------------------------|----------|--------|-------|----------|
| (2020)          |     |             | 20(504) |       |               | VO <sub>2peak</sub> | SMD:0.58(0.32,0.85)    | Moderate | <0.001 | 57.4% | Very low |
|                 |     |             | 5(461)  |       |               | STS 10              | SMD:-0.55(-1.00,-0.09) | Moderate | 0.019  | 71.6% | Very low |
| Sheng (2014)    | RCT | HD          | 7(233)  | Mixed | Intradialytic | Kt/V                | SMD:0.27(0.01,0.53)    | Small    | 0.040  | 0.0%  | Very low |
|                 |     |             | 7(310)  |       |               | VO <sub>2peak</sub> | SMD:0.53(0.30,0.76)    | Moderate | <0.001 | 36.0% | Very low |
|                 |     |             | 7(256)  |       |               | PCS                 | SMD:0.30(0.05,0.55)    | Small    | 0.02   | 39.5% | Very low |
|                 |     |             | 5(167)  |       |               | MCS                 | SMD:0.14(-0.16,0.43)   | Small    | 0.37   | 14.8% | Very low |
|                 |     |             | 4(146)  |       |               | 6MWT                | SMD:0.58(0.23,0.93)    | Moderate | <0.001 | 89.7% | Very low |
|                 |     |             | 7(296)  |       |               | DBP                 | SMD:-0.24(-0.47,-0.01) | Small    | 0.04   | 52.1% | Very low |
|                 |     |             | 7(296)  |       |               | SBP                 | SMD:-0.27(-0.50,-0.04) | Small    | 0.02   | 0.0%  | Very low |
|                 |     |             | 3(106)  |       |               | STS 60              | SMD:0.71(0.31,1.12)    | Moderate | <0.001 | 0.0%  | Very low |
| Neto (2018)     | RCT | HD          | 10(394) | Mixed | Intradialytic | VO <sub>2peak</sub> | SMD:0.60(0.15,1.04)    | Moderate | 0.008  | 76.0% | Very low |
|                 |     |             | 7(187)  |       |               | PCS                 | SMD:0.50(-0.19,1.18)   | Moderate | 0.16   | 62.0% | Very low |
|                 |     |             | 7(185)  |       |               | MCS                 | SMD:0.39(-0.19,0.98)   | Small    | 0.19   | 50.0% | Very low |
|                 |     |             | 6(158)  |       |               | 6MWT                | SMD:0.96(0.11,1.80)    | Large    | 0.03   | 82.0% | Very low |
|                 |     |             | 9(250)  |       |               | Muscle strength     | SMD:0.61(0.39,0.83)    | Moderate | <0.001 | 58.9% | Very low |
| Ferrari (2019)  | RCT | HD          | 12(370) | AE    | Intradialytic | Kt/V                | MD:0.08(0,0.15)        | -        | 0.04   | 56.0% | Low      |
|                 |     |             | 6(220)  | RT    |               | Kt/V                | MD:0.1(0,0.2)          | -        | 0.06   | 6.0%  | Very low |
|                 |     |             | 5(201)  | COM   |               | VO <sub>2peak</sub> | MD:5.41(4.03,6.79)     | -        | <0.001 | 0.0%  | Low      |
|                 |     |             | 7(248)  | AE    |               | VO <sub>2peak</sub> | MD:2.07(0.42,3.72)     | -        | <0.001 | 0.0%  | Very low |
|                 |     |             | 6(211)  | RT    |               | 6MWT                | MD:68.5(29.05,107.96)  | -        | <0.001 | 36.0% | Low      |
|                 |     |             | 6(188)  | AE    |               | 6MWT                | MD:64.98(43.86,86.11)  | -        | <0.001 | 0.0%  | Low      |
|                 |     |             | 10(332) | AE    |               | SBP                 | MD:-10.07(16.35,-3.78) | -        | 0.002  | 44.0% | Low      |
|                 |     |             | 10(334) | AE    |               | DBP                 | MD:-2.96(-7.71,1.78)   | -        | 0.22   | 0.0%  | Low      |
| Wyngaert (2018) | RCT | Predialysis | 8(269)  | AE    | -             | SBP                 | SMD:0.08(-0.58,0.74)   | Small    | 0.81   | 84%   | Very low |
|                 |     |             | 7(237)  | AE    |               | DBP                 | SMD:-0.09(-0.78,0.59)  | Small    | 0.79   | 83%   | Very low |

|                 |     |      |         |       |   |                                      |                        |          |        |       |          |
|-----------------|-----|------|---------|-------|---|--------------------------------------|------------------------|----------|--------|-------|----------|
|                 |     |      | 11(325) |       |   | VO <sub>2peak</sub>                  | SMD:0.99(0.49,1.48)    | Large    | <0.001 | 74.0% | Very low |
|                 |     |      | 9(294)  |       |   | BMI                                  | SMD:-0.36(-0.60,-0.13) | Small    | 0.002  | 48.0% | Low      |
| Oguch<br>(2018) | RCT | KTRs | 4(182)  | Mixed | - | VO <sub>2peak</sub>                  | SMD:0.38(-0.06,0.82)   | Small    | 0.09   | 45.0% | Low      |
|                 |     |      | 4(179)  |       |   | HRQoL                                | SMD:0.54(0.02,1.07)    | Moderate | 0.04   | 58.0% | Very low |
| Ju<br>(2020)    | RCT |      | 3 (115) | Mixed | - | HGS                                  | SMD:0.52(0.14,0.89)    | Moderate | 0.007  | 0.0%  | Very low |
|                 |     |      | 3 (387) |       |   | Symptom/problem<br>(KDQoL)           | SMD:1.92(-1.06,4.90)   | Large    | 0.21   | 99.0% | Very low |
|                 |     |      | 3 (387) |       |   | Effects of kidney<br>disease (KDQoL) | SMD:-3.69(-8.56,1.19)  | Large    | 0.14   | 99.0% | Very low |
|                 |     |      | 3 (387) |       |   | Burden of kidney<br>disease (KDQoL)  | SMD:1.04 (-0.75,2.82)  | Large    | 0.26   | 98.0% | Very low |

Abbreviation: RCT = randomized controlled trial; AE = aerobic exercise; RT = resistance training; COM = combine; VO<sub>2peak</sub> = peak oxygen uptake; HRQoL = health-related quality of life; DBP = diastolic blood pressure; SBP = systolic blood pressure; PCS = physical component summary; MCS = mental component summary; 6MWT = 6 minutes walk test; STS 10 = sit to stand 10 test; STS 30 = sit to stand 30 test; STS 60 = sit to stand 60 test; TUGT = timed up and go test; RLS = Restless Legs Syndrome; BMI = body mass index; SMD = standardized mean difference; MD = mean difference; HD = hemodialysis; KTRs = kidney transplant recipients; SF-36 = short form-36; KDQoL = kidney disease quality of life; GRADE = Grading of Recommendations Assessment, Development, and Evaluation.

\*Number of included studies and corresponding sample size.

Mixed means aerobic exercise combined with resistance training.

Supplementary Table S4 Results of the assessment of the methodological quality of the included meta-analyses using AMSTAR-2

| Author         | AMSTAR-2 Items |   |   |   |   |   |   |   |   |    |    |    |    |    |    |    | Score  |
|----------------|----------------|---|---|---|---|---|---|---|---|----|----|----|----|----|----|----|--------|
|                | 1              | 2 | 3 | 4 | 5 | 6 | 7 | 8 | 9 | 10 | 11 | 12 | 13 | 14 | 15 | 16 |        |
| Pei(2019)      | √              | × | √ | ○ | √ | √ | × | √ | √ | ×  | √  | ×  | ×  | ×  | √  | ×  | 53.1%  |
| Ferreira(2019) | √              | √ | √ | ○ | √ | √ | × | ○ | √ | ×  | √  | ×  | ×  | ×  | ×  | ×  | 50.0%  |
| Cheema(2014)   | √              | × | √ | √ | √ | √ | √ | √ | √ | ×  | √  | √  | √  | √  | √  | √  | 87.5%  |
| Wu(2020)       | √              | √ | √ | ○ | √ | √ | × | √ | √ | ×  | √  | √  | √  | √  | √  | √  | 84.4%  |
| Nakamura(2020) | √              | √ | √ | ○ | √ | √ | × | √ | √ | ×  | √  | √  | √  | √  | √  | √  | 84.4%  |
| Lu(2019)       | √              | × | √ | ○ | √ | × | × | ○ | ○ | ×  | √  | ×  | ×  | ×  | √  | √  | 46.9%  |
| Chen(2019)     | √              | × | √ | ○ | × | √ | × | √ | ○ | ×  | √  | ×  | ×  | ×  | ×  | √  | 43.8%  |
| Song(2018)     | √              | × | √ | ○ | √ | √ | × | √ | √ | ×  | √  | ×  | √  | √  | √  | √  | 71.9%  |
| Salhab(2021)   | √              | √ | √ | ○ | √ | √ | × | √ | × | ×  | √  | ×  | ×  | √  | ×  | ×  | 53.1%  |
| Andrade(2019)  | √              | √ | √ | ○ | √ | √ | × | √ | √ | ×  | √  | ×  | ×  | √  | ×  | √  | 65.6%  |
| Chung(2016)    | √              | × | √ | ○ | √ | √ | √ | √ | √ | ×  | √  | √  | √  | √  | √  | ×  | 78.1%  |
| Zhang(2019)    | √              | × | √ | ○ | √ | √ | × | √ | √ | ×  | √  | ×  | √  | √  | √  | ×  | 65.6%  |
| Pu(2019)       | √              | × | √ | ○ | √ | √ | × | √ | √ | ×  | √  | √  | √  | √  | ×  | √  | 71.9%  |
| Yamamoto(2021) | √              | × | √ | × | √ | √ | × | ○ | √ | ×  | √  | √  | √  | √  | √  | √  | 71.9%  |
| Thompson(2019) | √              | × | √ | ○ | √ | √ | × | √ | √ | √  | √  | √  | √  | √  | √  | √  | 84.4%  |
| Yang(2017)     | √              | × | √ | ○ | √ | √ | × | ○ | √ | ×  | √  | √  | √  | √  | √  | √  | 75.0%  |
| Clarkson(2019) | √              | × | √ | ○ | √ | √ | × | √ | √ | ×  | √  | √  | √  | √  | √  | √  | 78.1%  |
| Zhao(2019)     | √              | × | √ | ○ | √ | √ | × | √ | √ | ×  | √  | ×  | √  | ×  | ×  | √  | 59.4%  |
| Zhang(2019)    | √              | × | √ | ○ | √ | √ | × | ○ | √ | ×  | √  | √  | ×  | ×  | √  | √  | 62.5%  |
| Huang(2019)    | √              | √ | √ | ○ | √ | √ | × | √ | √ | ×  | √  | √  | ×  | ×  | √  | √  | 71.9%  |
| Heiwe(2011)    | √              | √ | √ | √ | √ | √ | √ | √ | √ | √  | √  | √  | √  | √  | √  | √  | 100.0% |
| Heiwe(2014)    | √              | √ | √ | ○ | √ | √ | √ | √ | √ | ×  | √  | ×  | √  | √  | ×  | √  | 78.1%  |



|                 |   |   |   |   |   |   |   |   |   |   |   |   |   |   |   |   |       |
|-----------------|---|---|---|---|---|---|---|---|---|---|---|---|---|---|---|---|-------|
| Matsuzawa(2017) | √ | √ | √ | ○ | √ | √ | × | √ | √ | × | √ | × | × | √ | √ | √ | 71.9% |
| Smart(2011)     | √ | × | √ | ○ | √ | × | × | ○ | ○ | × | √ | × | × | √ | × | × | 40.6% |
| Bogataj(2020)   | √ | × | √ | ○ | √ | × | × | √ | √ | × | √ | √ | × | √ | × | √ | 59.4% |
| Sheng(2014)     | √ | × | √ | ○ | √ | √ | √ | √ | √ | × | √ | × | × | √ | √ | × | 65.6% |
| Neto(2018)      | √ | × | √ | ○ | √ | √ | × | √ | √ | × | √ | × | × | × | × | √ | 53.1% |
| Ferrari(2019)   | √ | √ | √ | ○ | √ | √ | √ | √ | √ | × | √ | √ | √ | √ | √ | √ | 90.6% |
| Wyngaert(2018)  | √ | √ | √ | ○ | √ | √ | × | √ | √ | × | √ | √ | √ | √ | √ | √ | 84.4% |
| Oguchi(2018)    | √ | √ | √ | ○ | √ | √ | × | √ | √ | × | √ | √ | √ | × | √ | × | 71.9% |
| Ju(2020)        | √ | × | √ | ○ | × | × | × | √ | √ | × | √ | × | × | × | × | × | 34.4% |

√ mean yes; ○ mean partial yes; ×mean no.

1. Did the research questions and inclusion criteria for the review include the components of PICO? 2. Did the report of the review contain an explicit statement that the review methods were established prior to the conduct of the review and did the report justify any significant deviations from the protocol? 3. Did the review authors explain their selection of the study designs for inclusion in the review? 4. Did the review authors use a comprehensive literature search strategy? 5. Did the review authors perform study selection in duplicate? 6. Did the review authors perform data extraction in duplicate? 7. Did the review authors provide a list of excluded studies and justify the exclusions? 8. Did the review authors describe the included studies in adequate detail? 9. Did the review authors use a satisfactory technique for assessing the risk of bias (RoB) in individual studies that were included in the review? 10. Did the review authors report on the sources of funding for the studies included in the review? 11. If meta-analysis was performed did the review authors use appropriate methods for statistical combination of results? 12. If meta-analysis was performed, did the review authors assess the potential impact of RoB in individual studies on the results of the meta-analysis or other evidence synthesis? 13. Did the review authors account for RoB in individual studies when interpreting/ discussing the results of the review? 14. Did the review authors provide a satisfactory explanation for, and discussion of, any heterogeneity observed in the results of the review? 15. If they performed quantitative synthesis did the review authors carry out an adequate investigation of publication bias (small study bias) and discuss its likely impact on the results of the review? 16. Did the review authors report any potential sources of conflict of interest, including any funding they received for conducting the review?

Supplementary Table S5: Results of the assessment of the quality of evidence for each outcome of the included meta-analyses using GRADE

| Author                | Outcome                   | GRADE items       |                   |              |              |                   | Quality of the evidence |
|-----------------------|---------------------------|-------------------|-------------------|--------------|--------------|-------------------|-------------------------|
|                       |                           | Risk of bias      | Inconsistency     | Indirectness | Imprecision  | Publication bias  |                         |
| Pei (2019)            | VO <sub>2peak</sub>       | Very serious (-2) | Neutral           | Neutral      | Neutral      | Neutral           | Moderate                |
|                       | STS 60                    | Serious (-1)      | Very serious (-2) | Neutral      | Neutral      | Serious (-1)      | Very low                |
|                       | 6MWT                      | Serious (-1)      | Very serious (-2) | Neutral      | Neutral      | Serious (-1)      | Very low                |
|                       | SBP                       | Serious (-1)      | Neutral           | Neutral      | Neutral      | Not reported (-1) | Moderate                |
|                       | DBP                       | Serious (-1)      | Neutral           | Neutral      | Neutral      | Not reported (-1) | Moderate                |
|                       | Physical function (SF-36) | Serious (-1)      | Very serious (-2) | Neutral      | Serious (-1) | Serious (-1)      | Very low                |
|                       | Physical role (SF-36)     | Serious (-1)      | Very serious (-2) | Neutral      | Serious (-1) | Serious (-1)      | Very low                |
|                       | Social function (SF-36)   | Serious (-1)      | Very serious (-2) | Neutral      | Serious (-1) | Serious (-1)      | Very low                |
|                       | Pain (SF-36)              | Serious (-1)      | Serious (-1)      | Neutral      | Serious (-1) | Serious (-1)      | Very low                |
|                       | General health (SF-36)    | Serious (-1)      | Very serious (-2) | Neutral      | Serious (-1) | Serious (-1)      | Very low                |
| Mental health (SF-36) | Serious (-1)              | Very serious (-2) | Neutral           | Serious (-1) | Serious (-1) | Very low          |                         |
| Ferreira (2019)       | Kt/V                      | Very serious (-2) | Very serious (-2) | Neutral      | Serious (-1) | Not reported (-1) | Very low                |
| Cheema (2014)         | Muscle Strength           | Neutral           | Neutral           | Neutral      | Serious (-1) | Serious (-1)      | Moderate                |
|                       | HRQoL                     | Neutral           | Neutral           | Neutral      | Serious (-1) | Serious (-1)      | Moderate                |
| Wu (2020)             | SBP                       | Very serious (-2) | Serious (-1)      | Neutral      | Serious (-1) | Serious (-1)      | Very low                |
|                       | DBP                       | Very serious (-2) | Serious (-1)      | Neutral      | Serious (-1) | Serious (-1)      | Very low                |

|                    |                     |                   |                   |         |                   |              |          |
|--------------------|---------------------|-------------------|-------------------|---------|-------------------|--------------|----------|
| Nakamura<br>(2020) | VO <sub>2peak</sub> | Neutral           | Serious (-1)      | Neutral | Neutral           | Serious (-1) | Moderate |
|                    | Muscle Strength     | Very serious (-2) | Neutral           | Neutral | Serious (-1)      | Serious (-1) | Very low |
|                    | 6MWT                | Neutral           | Very serious (-2) | Neutral | Serious (-1)      | Serious (-1) | Very low |
|                    | TUGT                | Serious (-1)      | Neutral           | Neutral | Serious (-1)      | Serious (-1) | Very low |
| Lu<br>(2019)       | 6MWT                | Neutral           | Neutral           | Neutral | Serious (-1)      | Neutral      | Moderate |
|                    | STS 10              | Neutral           | Serious (-1)      | Neutral | Serious (-1)      | Serious (-1) | Very low |
|                    | HGS                 | Neutral           | Neutral           | Neutral | Serious (-1)      | Serious (-1) | Moderate |
|                    | Muscle strength     | Neutral           | Neutral           | Neutral | Serious (-1)      | Serious (-1) | Moderate |
|                    | STS 30              | Neutral           | Neutral           | Neutral | Serious (-1)      | Serious (-1) | Moderate |
| Chen<br>(2019)     | SBP                 | Serious (-1)      | Neutral           | Neutral | Serious (-1)      | Serious (-1) | Very low |
|                    | DBP                 | Serious (-1)      | Serious (-1)      | Neutral | Serious (-1)      | Serious (-1) | Very low |
|                    | BMI                 | Serious (-1)      | Neutral           | Neutral | Serious (-1)      | Serious (-1) | Very low |
|                    | VO <sub>2peak</sub> | Serious (-1)      | Neutral           | Neutral | Serious (-1)      | Serious (-1) | Very low |
| Song<br>(2018)     | RLS                 | Serious (-1)      | Serious (-1)      | Neutral | Very serious (-2) | Serious (-1) | Very low |
|                    | Fatigue             | Serious (-1)      | Neutral           | Neutral | Serious (-1)      | Serious (-1) | Very low |
| Salhab<br>(2019)   | PCS                 | Not reported (-1) | Serious (-1)      | Neutral | Very serious (-2) | Serious (-1) | Very low |
|                    | MCS                 | Not reported (-1) | Serious (-1)      | Neutral | Serious (-1)      | Serious (-1) | Very low |
| Andrade<br>(2019)  | VO <sub>2peak</sub> | Neutral           | Neutral           | Neutral | Serious (-1)      | Serious (-1) | Moderate |
| Chung<br>(2019)    | 6MWT                | Neutral           | Neutral           | Neutral | Serious (-1)      | Serious (-1) | Moderate |
|                    | VO <sub>2peak</sub> | Neutral           | Serious (-1)      | Neutral | Serious (-1)      | Serious (-1) | Very low |
|                    | PCS                 | Neutral           | Neutral           | Neutral | Serious (-1)      | Serious (-1) | Moderate |
|                    | MCS                 | Neutral           | Neutral           | Neutral | Serious (-1)      | Serious (-1) | Moderate |
| Zhang<br>(2021)    | 6MWT                | Serious (-1)      | Neutral           | Neutral | Serious (-1)      | Serious (-1) | Very low |
|                    | STS 30              | Serious (-1)      | Neutral           | Neutral | Serious (-1)      | Serious (-1) | Very low |

1  
2  
3  
4  
5  
6  
7  
8  
9  
10  
11  
12  
13  
14  
15  
16  
17  
18  
19  
20  
21  
22  
23  
24  
25  
26  
27  
28  
29  
30  
31  
32  
33  
34  
35  
36  
37  
38  
39  
40  
41  
42  
43  
44  
45  
46

|                    |                     |                   |              |         |              |                   |          |
|--------------------|---------------------|-------------------|--------------|---------|--------------|-------------------|----------|
|                    | HGS                 | Serious (-1)      | Neutral      | Neutral | Serious (-1) | Serious (-1)      | Very low |
|                    | PCS                 | Very serious (-2) | Neutral      | Neutral | Serious (-1) | Serious (-1)      | Very low |
|                    | MCS                 | Very serious (-2) | Neutral      | Neutral | Serious (-1) | Serious (-1)      | Very low |
| Pu<br>(2019)       | Kt/V                | Serious (-1)      | Neutral      | Neutral | Serious (-1) | Not reported (-1) | Very low |
|                    | VO <sub>2peak</sub> | Neutral           | Serious (-1) | Neutral | Neutral      | Not reported (-1) | Moderate |
|                    | 6MWT                | Neutral           | Neutral      | Neutral | Serious (-1) | Serious (-1)      | Moderate |
|                    | PCS                 | Neutral           | Serious (-1) | Neutral | Serious (-1) | Not reported (-1) | Very low |
|                    | MCS                 | Neutral           | Neutral      | Neutral | Serious (-1) | Serious (-1)      | Moderate |
|                    | SBP                 | Serious (-1)      | Neutral      | Neutral | Serious (-1) | Serious (-1)      | Very low |
|                    | DBP                 | Serious (-1)      | Neutral      | Neutral | Serious (-1) | Serious (-1)      | Very low |
| Yamamoto<br>(2021) | SBP                 | Very serious (-2) | Serious (-1) | Neutral | Serious (-1) | Serious (-1)      | Very low |
|                    | VO <sub>2peak</sub> | Very serious (-2) | Neutral      | Neutral | Serious (-1) | Neutral           | Very low |
|                    | BMI                 | Very serious (-2) | Neutral      | Neutral | Neutral      | Neutral           | Low      |
| Thompson<br>(2019) | SBP                 | Very serious (-2) | Serious (-1) | Neutral | Serious (-1) | Serious (-1)      | Very low |
|                    | DBP                 | Very serious (-2) | Serious (-1) | Neutral | Serious (-1) | Serious (-1)      | Very low |
| Yang<br>(2017)     | VO <sub>2peak</sub> | Neutral           | Neutral      | Neutral | Serious (-1) | Serious (-1)      | Low      |
| Clarkson<br>(2019) | 6MWT                | Neutral           | Neutral      | Neutral | Neutral      | Serious (-1)      | Moderate |
| Zhao<br>(2019)     | Fatigue             | Neutral           | Neutral      | Neutral | Serious (-1) | Serious (-1)      | Low      |
|                    | PCS                 | Neutral           | Neutral      | Neutral | Serious (-1) | Serious (-1)      | Low      |
|                    | MCS                 | Neutral           | Serious (-1) | Neutral | Serious (-1) | Serious (-1)      | Very low |
| Zhang<br>(2019)    | SBP                 | Neutral           | Serious (-1) | Neutral | Neutral      | Neutral           | Moderate |
|                    | DBP                 | Neutral           | Serious (-1) | Neutral | Serious (-1) | Neutral           | Low      |
|                    | BMI                 | Serious (-1)      | Neutral      | Neutral | Neutral      | Neutral           | Moderate |

|                     |                     |                   |                   |         |                   |                   |          |
|---------------------|---------------------|-------------------|-------------------|---------|-------------------|-------------------|----------|
| Huang<br>(2019)     | Kt/V                | Very serious (-2) | Neutral           | Neutral | Serious (-1)      | Serious (-1)      | Very low |
|                     | SBP                 | Neutral           | Neutral           | Neutral | Serious (-1)      | Serious (-1)      | Low      |
|                     | DBP                 | Neutral           | Serious (-1)      | Neutral | Serious (-1)      | Serious (-1)      | Very low |
|                     | 6MWT                | Serious (-1)      | Very serious (-2) | Neutral | Serious (-1)      | Serious (-1)      | Very low |
|                     | PCS                 | Neutral           | Neutral           | Neutral | Serious (-1)      | Serious (-1)      | Low      |
|                     | MCS                 | Neutral           | Neutral           | Neutral | Serious (-1)      | Serious (-1)      | Low      |
|                     | VO <sub>2peak</sub> | Serious (-1)      | Neutral           | Neutral | Serious (-1)      | Neutral           | Low      |
| Heiwe<br>(2011)     | Aerobic capacity    | Neutral           | Neutral           | Neutral | Neutral           | Serious (-1)      | Moderate |
|                     | Muscle strength     | Neutral           | Neutral           | Neutral | Serious (-1)      | Serious (-1)      | Low      |
|                     | Walking capacity    | Neutral           | Neutral           | Neutral | Serious (-1)      | Serious (-1)      | Low      |
|                     | SBP                 | Neutral           | Neutral           | Neutral | Serious (-1)      | Serious (-1)      | Low      |
|                     | DBP                 | Neutral           | Neutral           | Neutral | Neutral           | Neutral           | High     |
| Heiwe<br>(2014)     | Aerobic capacity    | Neutral           | Neutral           | Neutral | Serious (-1)      | Not reported (-1) | Low      |
|                     | DBP                 | Neutral           | Neutral           | Neutral | Serious (-1)      | Not reported (-1) | Low      |
|                     | SBP                 | Neutral           | Serious (-1)      | Neutral | Serious (-1)      | Not reported (-1) | Very low |
|                     | Muscle strength     | Serious (-1)      | Neutral           | Neutral | Serious (-1)      | Not reported (-1) | Very low |
|                     | Walking capacity    | Neutral           | Neutral           | Neutral | Serious (-1)      | Not reported (-1) | Low      |
| Matsuzawa<br>(2017) | VO <sub>2peak</sub> | Neutral           | Neutral           | Neutral | Neutral           | Neutral           | High     |
|                     | 6MWT                | Serious (-1)      | Serious (-1)      | Neutral | Serious (-1)      | Neutral           | Very low |
|                     | Muscle strength     | Serious (-1)      | Neutral           | Neutral | Serious (-1)      | Serious (-1)      | Very low |
|                     | PCS                 | Very serious (-2) | Neutral           | Neutral | Serious (-1)      | Serious (-1)      | Very low |
|                     | MCS                 | Very serious (-2) | Neutral           | Neutral | Serious (-1)      | Serious (-1)      | Very low |
| Smart<br>(2011)     | VO <sub>2peak</sub> | Neutral           | Serious (-1)      | Neutral | Neutral           | Serious (-1)      | Low      |
| Bogataj             | 6MWT                | Serious (-1)      | Serious (-1)      | Neutral | Not reported (-1) | Not reported (-1) | Very low |

|                    |                           |                   |                   |         |                   |                   |          |
|--------------------|---------------------------|-------------------|-------------------|---------|-------------------|-------------------|----------|
| (2020)             | VO <sub>2peak</sub>       | Very serious (-2) | Serious (-1)      | Neutral | Not reported (-1) | Not reported (-1) | Very low |
|                    | STS 10                    | Neutral           | Serious (-1)      | Neutral | Not reported (-1) | Serious (-1)      | Very low |
| Sheng<br>(2014)    | Kt/V                      | Serious (-1)      | Neutral           | Neutral | Serious (-1)      | Serious (-1)      | Very low |
|                    | VO <sub>2peak</sub>       | Serious (-1)      | Neutral           | Neutral | Serious (-1)      | Serious (-1)      | Very low |
|                    | PCS                       | Serious (-1)      | Neutral           | Neutral | Serious (-1)      | Serious (-1)      | Very low |
|                    | MCS                       | Serious (-1)      | Neutral           | Neutral | Serious (-1)      | Serious (-1)      | Very low |
|                    | 6MWT                      | Serious (-1)      | Very serious (-2) | Neutral | Serious (-1)      | Serious (-1)      | Very low |
|                    | DBP                       | Serious (-1)      | Serious (-1)      | Neutral | Serious (-1)      | Serious (-1)      | Very low |
|                    | SBP                       | Serious (-1)      | Neutral           | Neutral | Serious (-1)      | Serious (-1)      | Very low |
| Neto<br>(2018)     | STS60                     | Serious (-1)      | Neutral           | Neutral | Serious (-1)      | Serious (-1)      | Very low |
|                    | VO <sub>2peak</sub>       | Serious (-1)      | Very serious (-2) | Neutral | Serious (-1)      | Not reported (-1) | Very low |
|                    | PCS                       | Serious (-1)      | Serious (-1)      | Neutral | Serious (-1)      | Serious (-1)      | Very low |
|                    | MCS                       | Serious (-1)      | Serious (-1)      | Neutral | Serious (-1)      | Serious (-1)      | Very low |
|                    | 6MWT                      | Serious (-1)      | Very serious (-2) | Neutral | Serious (-1)      | Serious (-1)      | Very low |
| Ferrari<br>(2019)  | Muscle strength           | Neutral           | Serious (-1)      | Neutral | Serious (-1)      | Serious (-1)      | Very low |
|                    | Kt/V (AE)                 | Neutral           | Serious (-1)      | Neutral | Serious (-1)      | Neutral           | Low      |
|                    | Kt/V (RT)                 | Serious (-1)      | Neutral           | Neutral | Serious (-1)      | Serious (-1)      | Very low |
|                    | VO <sub>2peak</sub> (COM) | Neutral           | Neutral           | Neutral | Serious (-1)      | Serious (-1)      | Low      |
|                    | VO <sub>2peak</sub> (AE)  | Serious (-1)      | Neutral           | Neutral | Serious (-1)      | Serious (-1)      | Very low |
|                    | 6MWT (RT)                 | Neutral           | Neutral           | Neutral | Serious (-1)      | Serious (-1)      | Low      |
|                    | 6MWT(AE)                  | Neutral           | Neutral           | Neutral | Serious (-1)      | Serious (-1)      | Low      |
|                    | SBP                       | Serious (-1)      | Neutral           | Neutral | Serious (-1)      | Neutral           | Low      |
| Wyngaert<br>(2018) | DBP                       | Serious (-1)      | Neutral           | Neutral | Serious (-1)      | Neutral           | Low      |
|                    | SBP                       | Serious (-1)      | Serious (-1)      | Neutral | Serious (-1)      | Serious (-1)      | Very low |
| Wyngaert<br>(2018) | DBP                       | Serious (-1)      | Very serious (-2) | Neutral | Serious (-1)      | Serious (-1)      | Very low |

|                  |                                      |                   |                   |         |              |                   |          |
|------------------|--------------------------------------|-------------------|-------------------|---------|--------------|-------------------|----------|
|                  | VO <sub>2peak</sub>                  | Serious (-1)      | Very serious (-2) | Neutral | Serious (-1) | Neutral           | Very low |
|                  | BMI                                  | Serious (-1)      | Neutral           | Neutral | Serious (-1) | Neutral           | Low      |
| Oguchi<br>(2018) | VO <sub>2peak</sub>                  | Neutral           | Neutral           | Neutral | Serious (-1) | Serious (-1)      | Low      |
|                  | HRQoL                                | Serious (-1)      | Serious (-1)      | Neutral | Serious (-1) | Serious (-1)      | Very low |
| Ju<br>(2020)     | HGS                                  | Very serious (-2) | Neutral           | Neutral | Serious (-1) | Neutral           | Very low |
|                  | Symptom/problem<br>(KDQoL)           | Very serious (-2) | Very serious (-2) | Neutral | Serious (-1) | Not reported (-1) | Very low |
|                  | effects of kidney<br>disease (KDQoL) | Very serious (-2) | Very serious (-2) | Neutral | Serious (-1) | Not reported (-1) | Very low |
|                  | burden of kidney<br>disease (KDQoL)  | Very serious (-2) | Very serious (-2) | Neutral | Serious (-1) | Not reported (-1) | Very low |

Abbreviation: AE = aerobic exercise; RT = resistance training; COM = combine; VO<sub>2peak</sub> = peak oxygen uptake; HRQoL = health-related quality of life; DBP = diastolic blood pressure; SBP = systolic blood pressure; PCS = physical component summary; MCS = mental component summary; 6MWT = 6 minutes walk test; STS 10 = sit to stand 10 test; STS 30 = sit to stand 30 test; STS 60 = sit to stand 60 test; TUGT = timed up and go test; BMI = body mass index; SMD = standardized mean difference; HD = hemodialysis; KTRs = kidney transplant recipients; SF-36 = short form-36; KDQoL = kidney disease quality of life;

Very serious mean the included studies existed two or more high risk of bias in terms of randomization, blinding, allocation concealment, completeness of result data, or selective reporting, or  $75\% \leq I^2 \leq 100\%$ .

Serious mean the included studies existed two or more high risk of bias in terms of randomization, blinding, allocation concealment, completeness of result data, or selective reporting, or  $50\% \leq I^2 < 75\%$ , or the included study sample size < 400, asymmetric funnel plot or less than 9 studies included.

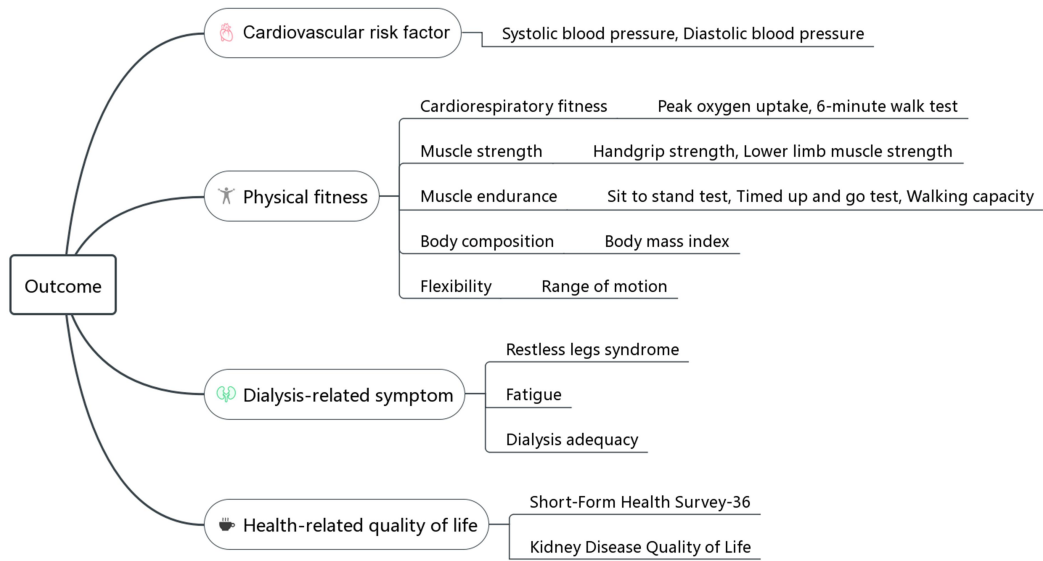

**Supplemental Figures S1**

peer review only





# PRISMA 2020 Checklist

1  
2  
3  
4  
5  
6  
7  
8  
9  
10  
11  
12  
13  
14  
15  
16  
17  
18  
19  
20  
21  
22  
23  
24  
25  
26  
27  
28  
29  
30  
31  
32  
33  
34  
35  
36  
37  
38  
39  
40  
41  
42  
43  
44  
45  
46  
47

| Section and Topic             | Item # | Checklist item                                                                                                                                                                                                                                                                                       | Location where item is reported |
|-------------------------------|--------|------------------------------------------------------------------------------------------------------------------------------------------------------------------------------------------------------------------------------------------------------------------------------------------------------|---------------------------------|
| <b>TITLE</b>                  |        |                                                                                                                                                                                                                                                                                                      |                                 |
| Title                         | 1      | Identify the report as a systematic review.                                                                                                                                                                                                                                                          | Page 1                          |
| <b>ABSTRACT</b>               |        |                                                                                                                                                                                                                                                                                                      |                                 |
| Abstract                      | 2      | See the PRISMA 2020 for Abstracts checklist.                                                                                                                                                                                                                                                         | Page 2                          |
| <b>INTRODUCTION</b>           |        |                                                                                                                                                                                                                                                                                                      |                                 |
| Rationale                     | 3      | Describe the rationale for the review in the context of existing knowledge.                                                                                                                                                                                                                          | Page 4                          |
| Objectives                    | 4      | Provide an explicit statement of the objective(s) or question(s) the review addresses.                                                                                                                                                                                                               | Page 4                          |
| <b>METHODS</b>                |        |                                                                                                                                                                                                                                                                                                      |                                 |
| Eligibility criteria          | 5      | Specify the inclusion and exclusion criteria for the review and how studies were grouped for the syntheses.                                                                                                                                                                                          | Page 4-5                        |
| Information sources           | 6      | Specify all databases, registers, websites, organisations, reference lists and other sources searched or consulted to identify studies. Specify the date when each source was last searched or consulted.                                                                                            |                                 |
| Search strategy               | 7      | Present the full search strategies for all databases, registers and websites, including any filters and limits used.                                                                                                                                                                                 | Page 4                          |
| Selection process             | 8      | Specify the methods used to decide whether a study met the inclusion criteria of the review, including how many reviewers screened each record and each report retrieved, whether they worked independently, and if applicable, details of automation tools used in the process.                     | Page 5                          |
| Data collection process       | 9      | Specify the methods used to collect data from reports, including how many reviewers collected data from each report, whether they worked independently, any processes for obtaining or confirming data from study investigators, and if applicable, details of automation tools used in the process. | Page 5                          |
| Data items                    | 10a    | List and define all outcomes for which data were sought. Specify whether all results that were compatible with each outcome domain in each study were sought (e.g. for all measures, time points, analyses), and if not, the methods used to decide which results to collect.                        | Page 4-5                        |
|                               | 10b    | List and define all other variables for which data were sought (e.g. participant and intervention characteristics, funding sources). Describe any assumptions made about any missing or unclear information.                                                                                         | Page 5                          |
| Study risk of bias assessment | 11     | Specify the methods used to assess risk of bias in the included studies, including details of the tool(s) used, how many reviewers assessed each study and whether they worked independently, and if applicable, details of automation tools used in the process.                                    | Page 5                          |
| Effect measures               | 12     | Specify for each outcome the effect measure(s) (e.g. risk ratio, mean difference) used in the synthesis or presentation of results.                                                                                                                                                                  | Page 5-6                        |
| Synthesis methods             | 13a    | Describe the processes used to decide which studies were eligible for each synthesis (e.g. tabulating the study intervention characteristics and comparing against the planned groups for each synthesis (item #5)).                                                                                 | Page 4-5                        |
|                               | 13b    | Describe any methods required to prepare the data for presentation or synthesis, such as handling of missing summary statistics, or data conversions.                                                                                                                                                | Page 5                          |
|                               | 13c    | Describe any methods used to tabulate or visually display results of individual studies and syntheses.                                                                                                                                                                                               | None                            |
|                               | 13d    | Describe any methods used to synthesize results and provide a rationale for the choice(s). If meta-analysis was performed, describe the model(s), method(s) to identify the presence and extent of statistical heterogeneity, and software package(s) used.                                          | Not applicable                  |
|                               | 13e    | Describe any methods used to explore possible causes of heterogeneity among study results (e.g. subgroup analysis, meta-regression).                                                                                                                                                                 | None                            |
|                               | 13f    | Describe any sensitivity analyses conducted to assess robustness of the synthesized results.                                                                                                                                                                                                         | None                            |
| Reporting bias assessment     | 14     | Describe any methods used to assess risk of bias due to missing results in a synthesis (arising from reporting biases).                                                                                                                                                                              | None                            |
| Certainty                     | 15     | Describe any methods used to assess certainty (or confidence) in the body of evidence for an outcome.                                                                                                                                                                                                | Page 6                          |

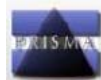

## PRISMA 2020 Checklist

1  
2  
3  
4  
5  
6  
7  
8  
9  
10  
11  
12  
13  
14  
15  
16  
17  
18  
19  
20  
21  
22  
23  
24  
25  
26  
27  
28  
29  
30  
31  
32  
33  
34  
35  
36  
37  
38  
39  
40  
41  
42  
43  
44  
45  
46  
47

| Section and Topic                              | Item # | Checklist item                                                                                                                                                                                                                                                                                                                                                                           | Location where item is reported |
|------------------------------------------------|--------|------------------------------------------------------------------------------------------------------------------------------------------------------------------------------------------------------------------------------------------------------------------------------------------------------------------------------------------------------------------------------------------|---------------------------------|
| assessment                                     |        |                                                                                                                                                                                                                                                                                                                                                                                          |                                 |
| <b>RESULTS</b>                                 |        |                                                                                                                                                                                                                                                                                                                                                                                          |                                 |
| Study selection                                | 16a    | Describe the results of the search and selection process, from the number of records identified in the search to the number of studies included in the review, ideally using a flow diagram.                                                                                                                                                                                             | Page 6                          |
|                                                | 16b    | Cite studies that might appear to meet the inclusion criteria, but which were excluded, and explain why they were excluded.                                                                                                                                                                                                                                                              | Page 6                          |
| Study characteristics                          | 17     | Cite each included study and present its characteristics.                                                                                                                                                                                                                                                                                                                                | Page 6                          |
| Risk of bias in studies                        | 18     | Present assessments of risk of bias for each included study.                                                                                                                                                                                                                                                                                                                             | Page 6                          |
| Results of individual studies                  | 19     | For all outcomes, present, for each study: (a) summary statistics for each group (where appropriate) and (b) an effect estimate and its precision (e.g. confidence/credible interval), ideally using structured tables or plots.                                                                                                                                                         | Page 18-32                      |
| Results of syntheses                           | 20a    | For each synthesis, briefly summarise the characteristics and risk of bias among contributing studies.                                                                                                                                                                                                                                                                                   | Not applicable                  |
|                                                | 20b    | Present results of all statistical syntheses conducted. If meta-analysis was done, present for each the summary estimate and its precision (e.g. confidence/credible interval) and measures of statistical heterogeneity. If comparing groups, describe the direction of the effect.                                                                                                     | Not applicable                  |
|                                                | 20c    | Present results of all investigations of possible causes of heterogeneity among study results.                                                                                                                                                                                                                                                                                           | Not applicable                  |
|                                                | 20d    | Present results of all sensitivity analyses conducted to assess the robustness of the synthesized results.                                                                                                                                                                                                                                                                               | None                            |
| Reporting biases                               | 21     | Present assessments of risk of bias due to missing results (arising from reporting biases) for each synthesis assessed.                                                                                                                                                                                                                                                                  | Page 6                          |
| Certainty of evidence                          | 22     | Present assessments of certainty (or confidence) in the body of evidence for each outcome assessed.                                                                                                                                                                                                                                                                                      | Page 6                          |
| <b>DISCUSSION</b>                              |        |                                                                                                                                                                                                                                                                                                                                                                                          |                                 |
| Discussion                                     | 23a    | Provide a general interpretation of the results in the context of other evidence.                                                                                                                                                                                                                                                                                                        | Page 10                         |
|                                                | 23b    | Discuss any limitations of the evidence included in the review.                                                                                                                                                                                                                                                                                                                          | Page 12                         |
|                                                | 23c    | Discuss any limitations of the review processes used.                                                                                                                                                                                                                                                                                                                                    | Page 12                         |
|                                                | 23d    | Discuss implications of the results for practice, policy, and future research.                                                                                                                                                                                                                                                                                                           | None                            |
| <b>OTHER INFORMATION</b>                       |        |                                                                                                                                                                                                                                                                                                                                                                                          |                                 |
| Registration and protocol                      | 24a    | Provide registration information for the review, including register name and registration number, or state that the review was not registered.                                                                                                                                                                                                                                           | Page 2                          |
|                                                | 24b    | Indicate where the review protocol can be accessed, or state that a protocol was not prepared.                                                                                                                                                                                                                                                                                           | Page 2                          |
|                                                | 24c    | Describe and explain any amendments to information provided at registration or in the protocol.                                                                                                                                                                                                                                                                                          | None                            |
| Support                                        | 25     | Describe sources of financial or non-financial support for the review, and the role of the funders or sponsors in the review.                                                                                                                                                                                                                                                            | Page 1                          |
| Competing interests                            | 26     | Declare any competing interests of review authors.                                                                                                                                                                                                                                                                                                                                       | Page 1                          |
| Availability of data, code and other materials | 27     | Report which of the following are publicly available and where they can be found: template data collection forms; data extracted from included studies; data used for all analyses; analytic code; any other materials used in the review.<br>For peer review only - <a href="http://bmjopen.bmj.com/site/about/guidelines.xhtml">http://bmjopen.bmj.com/site/about/guidelines.xhtml</a> | Page 1                          |

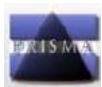

## PRISMA 2020 Checklist

1  
2  
3  
4  
5  
6  
7  
8  
9  
10  
11  
12  
13  
14  
15  
16  
17  
18  
19  
20  
21  
22  
23  
24  
25  
26  
27  
28  
29  
30  
31  
32  
33  
34  
35  
36  
37  
38  
39  
40  
41  
42  
43  
44  
45  
46  
47

From: Page MJ, McKenzie JE, Bossuyt PM, Boutron I, Hoffmann TC, Mulrow CD, et al. The PRISMA 2020 statement: an updated guideline for reporting systematic reviews. *BMJ* 2021;372:n71. doi: 10.1136/bmj.n71

For more information, visit: <http://www.prisma-statement.org/>

For peer review only

# BMJ Open

## Therapeutic effects of exercise interventions for patients with chronic kidney disease: an umbrella review of systematic reviews and meta-analyses

|                                 |                                                                                                                                                                                                                                                                                                                                                                                                                                                                                                                                |
|---------------------------------|--------------------------------------------------------------------------------------------------------------------------------------------------------------------------------------------------------------------------------------------------------------------------------------------------------------------------------------------------------------------------------------------------------------------------------------------------------------------------------------------------------------------------------|
| Journal:                        | <i>BMJ Open</i>                                                                                                                                                                                                                                                                                                                                                                                                                                                                                                                |
| Manuscript ID                   | bmjopen-2021-054887.R2                                                                                                                                                                                                                                                                                                                                                                                                                                                                                                         |
| Article Type:                   | Original research                                                                                                                                                                                                                                                                                                                                                                                                                                                                                                              |
| Date Submitted by the Author:   | 19-Jul-2022                                                                                                                                                                                                                                                                                                                                                                                                                                                                                                                    |
| Complete List of Authors:       | Zhang, Fan; Long Hua Hospital, Department of Nephrology<br>Bai, Yan; Shanghai University of Traditional Chinese Medicine, Longhua Clinical Medical College<br>Zhao, Xing; Shanghai University of Traditional Chinese Medicine, Longhua Clinical Medical College<br>Huang, Liuyan; Shanghai University of Traditional Chinese Medicine<br>Wang, Weiqiong; Long Hua Hospital, Blood Purification Centre<br>Zhou, Wenqin; Long Hua Hospital, Department of Nursing<br>Zhang, Huachun; Long Hua Hospital, Department of Nephrology |
| <b>Primary Subject Heading</b>: | Renal medicine                                                                                                                                                                                                                                                                                                                                                                                                                                                                                                                 |
| Secondary Subject Heading:      | Rehabilitation medicine, Evidence based practice                                                                                                                                                                                                                                                                                                                                                                                                                                                                               |
| Keywords:                       | Nephrology < INTERNAL MEDICINE, Rehabilitation medicine < INTERNAL MEDICINE, Chronic renal failure < NEPHROLOGY                                                                                                                                                                                                                                                                                                                                                                                                                |
|                                 |                                                                                                                                                                                                                                                                                                                                                                                                                                                                                                                                |

SCHOLARONE™  
Manuscripts



I, the Submitting Author has the right to grant and does grant on behalf of all authors of the Work (as defined in the below author licence), an exclusive licence and/or a non-exclusive licence for contributions from authors who are: i) UK Crown employees; ii) where BMJ has agreed a CC-BY licence shall apply, and/or iii) in accordance with the terms applicable for US Federal Government officers or employees acting as part of their official duties; on a worldwide, perpetual, irrevocable, royalty-free basis to BMJ Publishing Group Ltd ("BMJ") its licensees and where the relevant Journal is co-owned by BMJ to the co-owners of the Journal, to publish the Work in this journal and any other BMJ products and to exploit all rights, as set out in our [licence](#).

The Submitting Author accepts and understands that any supply made under these terms is made by BMJ to the Submitting Author unless you are acting as an employee on behalf of your employer or a postgraduate student of an affiliated institution which is paying any applicable article publishing charge ("APC") for Open Access articles. Where the Submitting Author wishes to make the Work available on an Open Access basis (and intends to pay the relevant APC), the terms of reuse of such Open Access shall be governed by a Creative Commons licence – details of these licences and which [Creative Commons](#) licence will apply to this Work are set out in our licence referred to above.

Other than as permitted in any relevant BMJ Author's Self Archiving Policies, I confirm this Work has not been accepted for publication elsewhere, is not being considered for publication elsewhere and does not duplicate material already published. I confirm all authors consent to publication of this Work and authorise the granting of this licence.

1  
2  
3  
4  
5  
6  
7  
8  
9  
10  
11  
12  
13  
14  
15  
16  
17  
18  
19  
20  
21  
22  
23  
24  
25  
26  
27  
28  
29  
30  
31  
32  
33  
34  
35  
36  
37  
38  
39  
40  
41  
42  
43  
44  
45  
46  
47  
48  
49  
50  
51  
52  
53  
54  
55  
56  
57  
58  
59  
60

1 **Therapeutic effects of exercise interventions for patients with chronic kidney**  
2 **disease: an umbrella review of systematic reviews and meta-analyses**

3 Title page

4 Fan Zhang<sup>1</sup>, Yan Bai<sup>2</sup>, Xing Zhao<sup>2</sup>, Liuyan Huang<sup>1</sup>, Weiqiong Wang<sup>3</sup>, Wenqin Zhou<sup>4</sup>,  
5 Huachun Zhang<sup>4</sup>

6 1 Department of Nephrology, Longhua Hospital Shanghai University of Traditional  
7 Chinese Medicine, ShangHai, 200032, China.

8 2 Longhua Clinical Medical College, Shanghai University of Traditional Chinese  
9 Medicine, Shang Hai, 200032, China.

10 3 Blood Purification Centre, Longhua Hospital Shanghai University of Traditional  
11 Chinese Medicine, ShangHai, 200032, China.

12 4 Department of Nursing, Longhua Hospital Shanghai University of Traditional  
13 Chinese Medicine, ShangHai, 200032, China.

14 **Key words:** Exercise, chronic kidney disease, systematic review, meta-analyses

15 **Running Head:** Exercise for chronic kidney disease

16 **First author**

17 Fan Zhang, Department of Nephrology, No. 725, Wan Ping Nan Road, Xuhui District,  
18 Shanghai, 200032, P.R. China E-mail: [fan\\_zhang1993@163.com](mailto:fan_zhang1993@163.com)

19 **Corresponding author**

20 Huachun Zhang, Department of Nursing, No. 725, Wan Ping Nan Road, Xuhui District,  
21 Shanghai, 200032, P.R. China, E-mail: [lhlky@163.com](mailto:lhlky@163.com)

22

## 1 ABSTRACT

2 **Objective** To conduct an overview of meta-analyses evaluating the impact of exercise  
3 interventions on improving health outcomes in patients with chronic kidney disease  
4 (CKD).

5 **Design** An umbrella review of systematic review and meta-analyses of intervention  
6 trials was performed.

7 **Data sources** PubMed, Web of Science, Embase, and the Cochrane Database of  
8 Systematic Reviews were searched from inception to March 9th, 2021, for relevant  
9 articles.

10 **Eligibility criteria for selecting studies** Eligible meta-analyses compared the effects  
11 of usual care with and without exercise in CKD patients. Health outcomes included  
12 those related to cardiovascular risk factors, physical fitness, dialysis-related symptoms,  
13 dialysis adequacy, and health-related quality of life. Systematic reviews and meta-  
14 analyses that included fewer than three RCTs or fewer than 100 participants were  
15 excluded from the analysis.

16 **Results** A total of 31 eligible systematic reviews and meta-analyses were included that  
17 assessed 120 outcomes. For physical fitness, there was a moderate effect size for  
18 cardiorespiratory fitness, muscle strength, and body composition and small effect size  
19 for muscle endurance. The effect sizes for cardiovascular risk factors, dialysis-related  
20 symptoms, and health-related quality of life outcomes were small. According to the  
21 Grading of Recommendations Assessment, Development, and Evaluation framework,  
22 most outcomes were low or very low quality.

23 **Conclusion** Exercise appears to be a safe way to affect concomitant cardiovascular risk  
24 factors, such as blood pressure, improve physical fitness and health-related quality of  
25 life, and reduce dialysis-related symptoms in CKD patients.

26 **Keywords:** Exercise, Chronic Kidney Disease, Systematic Review, Meta-Analyses

27 **PROSPERO registration number** CRD42020223591.

28

1  
2  
3  
4  
5  
6  
7  
8  
9  
10  
11  
12  
13  
14  
15  
16  
17  
18  
19  
20  
21  
22  
23  
24  
25  
26  
27  
28  
29  
30  
31  
32  
33  
34  
35  
36  
37  
38  
39  
40  
41  
42  
43  
44  
45  
46  
47  
48  
49  
50  
51  
52  
53  
54  
55  
56  
57  
58  
59  
60

1 **Strengths and limitations of this study**

2 1) A strength of this study is to comprehensively summarize the systematic review and  
3 meta-analysis of exercise interventions on the spectrum of chronic kidney disease.

4 2) Methodological quality of the included reviews was assessed using standardized  
5 measures.

6 3) The limitation of this overview is that language bias may exist in this review because  
7 the search strategy was limited to English.

8 4) Another limitation was that most studies were based on hemodialysis-dependent  
9 chronic kidney disease.  
10  
11



## 1 INTRODUCTION

2 Chronic kidney disease (CKD) is a long-term condition characterized by the gradual  
3 loss of renal function over time.[1] In the past 30 years, the mortality attributed to CKD  
4 increased by 41.5%, a percentage rate that exceeds several cancers and cardiovascular  
5 diseases.[2] With the increasing incidence of hypertension, diabetes, and obesity, this  
6 number will continue to rise.[3, 4] CKD patients experience a high symptom burden  
7 with progressively impaired physical performance, leading to decreased kidney  
8 function, lower health-related quality of life (HRQOL), increased risk of cardiovascular  
9 events, and increased all-cause mortality.[5, 6]

10 With an increasing number of patients with CKD living longer, the effectiveness and  
11 accessibility of their health services have never been more critical. Renal rehabilitation  
12 is a multifaceted intervention program. Rehabilitation consists of exercise interventions,  
13 diet control, fluid management, and psychological support to alleviate physical/mental  
14 deficiencies caused by kidney disease and renal replacement therapy to improve disease  
15 prognosis and prolong life expectancy.[7] Since exercise is the core of renal  
16 rehabilitation, there is an increasing number of systematic reviews and meta-analyses  
17 investigating the influence of exercise on health outcomes in CKD patients.[8]

18 Data from large cohort studies show that mortality risk was lower for regular (equal to  
19 or more than once/week) versus non-regular (less than once/week) exercisers [adjusted  
20 hazard ratio (HR)=0.73, 95% confidence interval (CI): 0.69–0.78], and mortality risk  
21 tended to decrease as exercise frequency increased (HR<sub>for participants who exercised once/week</sub> =  
22 0.82, 95% CI: 0.73–0.91; HR<sub>for those who exercised 6–7 times/week</sub> = 0.69, 95% CI: 0.63–0.76)  
23 and patients who exercised daily had lower mortality risk (HR = 0.84, 95% CI: 0.74–  
24 0.96) than patients exercising once/week.[9] Based on data from 41 randomized  
25 controlled trials (RCT), Heiwe et al. reported practical improvements in aerobic  
26 capacity, muscular function, and walking capacity in CKD patients after exercise, [10]  
27 indicators that are the core of frailty. [11] In other words, exercise is an essential non-  
28 pharmacological strategy to improve frailty symptoms in CKD patients, the latter being  
29 a significant cause of sedentary behavior in such population. [12] Because of this, some  
30 researchers and guidelines recommend that healthcare providers prescribe exercise for  
31 CKD patients.[13-16] However, the results of meta-analyses of exercise in CKD  
32 patients are inconsistent.

33 This umbrella review aims to assess the therapeutic effects of exercise on  
34 cardiovascular risk factors, physical fitness, dialysis-related symptoms, dialysis  
35 adequacy, and HRQOL in CKD patients, summarized in systematic reviews and meta-  
36 analyses.



1 Requisite data were extracted independently by two independent authors into a  
2 standardized format that included: 1) author, 2) publication year, 3) stage of CKD, 4)  
3 the number of included studies and participants, 5) exercise type, 6) exercise mode  
4 (intradialytic or interdialytic), 7) standardized mean difference (SMD) or mean  
5 difference (MD) with corresponding 95% CI for each outcome, 8) *P*-values, 9) *I*<sup>2</sup> values,  
6 and 10) exercise-related adverse events.

### 7 **Risk of bias assessment**

8 A Measurement Tool to Assess Systematic Reviews-2 (AMSTAR-2) was used to assess  
9 the risk of bias among the included systematic reviews.[19] This checklist contains 16  
10 items, and each item was answered with a "yes" (1 point), "partial yes" (0.5 points), or  
11 "no" (0 points). The percentage score for each study was calculated using the total score  
12 as the numerator and the highest score of 16 points as the denominator. A meta-analysis  
13 scoring  $\geq 80\%$  was classified as high quality, 40-79% as medium quality, and those  
14 scoring  $< 40\%$  as low quality.[20] Two authors performed the risk of bias assessment  
15 independently, and discussions resolved the disagreement.

### 16 **Data analysis**

17 The summary effect size from each meta-analysis was analyzed qualitatively based on  
18 the SMD and its 95% CI for each outcome. If they were not presented as SMD in the  
19 original meta-analysis, Review Manager V.5.3 was used to convert SMD outcomes. If  
20 data could not be converted into SMD, we contacted the authors of the meta-analysis  
21 for the data. Effects were considered small (SMD  $< 0.50$ ), moderate (SMD from 0.50  
22 to 0.79), and large (SMD  $\geq 0.80$ ).[21] *I*<sup>2</sup> values were interpreted as follows:  $\leq 25\%$   
23 indicate low heterogeneity,  $25\% < I^2 \leq 50\%$  indicate mild heterogeneity,  $50\% < I^2 \leq 75\%$   
24 indicate moderate heterogeneity, and  $> 75\%$  indicate high heterogeneity.[22]

25 The level of evidence for each meta-analysis was evaluated using the Grading of  
26 Recommendations Assessment, Development, and Evaluation (GRADE) system.[23]  
27 The quality of evidence was assessed using five domains: risk of bias, inconsistency,  
28 indirectness, imprecision, and publication bias. Beginning with an initial score of 4  
29 points, the score for each of these five domains was reduced accordingly: "not reported  
30 (-1)", "serious (-1)", "very serious (-2)", or "neutral (0)". Studies were rated as high (4  
31 points), moderate (3 points), low (2 points), or very low ( $\leq 1$  point) using the GRADE  
32 system. The GRADE assessment was conducted independently by two authors. Any  
33 differences were resolved by discussion or adjudication by a third author. The incidence  
34 of adverse events was based on the number of reported divided by the patients in the  
35 exercise group.

### 36 **RESULTS**

## 1 **Characteristics of the meta-analyses**

2 The search identified 2305 potential articles, of which 648 were duplicates. After  
3 reading the title and abstract, 1598 papers were excluded, and 28 were excluded after  
4 full-text review resulting in 31 final studies. [10, 24-53] The PRISMA flowchart of  
5 study inclusion is illustrated in **Figure 1**. The reasons for excluded articles are listed in  
6 **Supplementary Table S2**.

### 7 **Figure 1 Flowchart of literature screening.**

8 Legend: CDSR = Cochrane Database of Systemic Review

9  
10 The 31 included systematic reviews and meta-analyses were published from September  
11 2011 through March 2021. The number of included studies assessed in the articles  
12 ranged from 3 to 24, with a mean of 8 studies. The study sample sizes ranged from 106  
13 to 874 participants, with a mean of 304. The characteristics of the included meta-  
14 analyses are shown in **Supplement Table S3**. SMD data from four papers could not be  
15 obtained from the authors, and the data of their effect size was presented as MD.[29,  
16 30, 40, 46]

17 Scores based on AMSTAR-2 ranged from 34.4% to 100.0%, with an average score of  
18 68.0%. Seven (22.6%) systematic reviews were rated high quality, while 23 (74.2%)  
19 were rated medium quality, and just one (0.3%) was rated low quality (**Supplement**  
20 **Table S4**).

21 Of the GRADE evidence quality of the 120 outcomes, 1.7% (2 / 120) reported evidence  
22 of high quality, 17.5% (21 / 120) reported evidence of moderate quality, 20.0%  
23 (24 / 120) reported evidence of low quality, and 60.8% (73 / 120) reported evidence of  
24 very low quality (**Supplement Table S5**).

## 25 **Blood pressure**

26 There were 25 meta-analyses (reported in 13 articles) investigating the effect of  
27 exercise on cardiovascular risk factors (systolic and diastolic blood pressure) in CKD  
28 patients. [10, 27, 30, 33, 34, 40, 41, 43, 46-49, 52] Of which, the number of studies  
29 ranged from 3 to 12 with a mean of 314 participants (range from 198 to 514) were  
30 included in each meta-analysis (**Table 1**).

31 The effect of exercise on systolic blood pressure was investigated in 13 meta-analyses  
32 with a mild heterogeneity (average  $I^2 = 36.1\%$ ), [10, 27, 30, 33, 34, 40, 41, 43, 46-49,  
33 52] and six reported a positive statistically significant outcome. [30, 33, 41, 43, 49, 52]  
34 Of the 13 meta-analyses, nine reported a small effect size, [10, 27, 33, 34, 41, 43, 47,  
35 48, 52] and one reported moderate.[49] GRADE assessment of quality indicated the

1 overall evidence as being very low (10 meta-analyses[10, 27, 30, 33, 41, 43, 46-49]),  
2 low (two meta-analyses[34, 40]), and moderate (one meta-analysis[52]).

3 The effect of exercise on diastolic blood pressure was investigated in 12 meta-analyses  
4 with a mild heterogeneity (average  $I^2=49.1\%$ ),[10, 27, 30, 33, 34, 40, 41, 43, 46-48, 52]  
5 and 2 reported a positive statistically significant outcome.[41, 43] Of the 12 meta-  
6 analyses, nine reported small effect sizes [10, 27, 33, 34, 41, 43, 47, 48, 52], and all  
7 were graded as low or very low quality of evidence.

## 8 **Cardiorespiratory fitness**

9 There were 34 meta-analyses (reported in 21 articles) that investigated the effects of  
10 exercise on cardiorespiratory fitness in CKD patients using a peak oxygen uptake (18  
11 of 34), a 6-minute walk test (14 of 34), or aerobic capacity (2 of 34). The meta-analyses  
12 included a mean of nine studies (ranging from 5 to 20) and a mean of 330 participants  
13 (ranging from 179 to 504) (**Table 2**).

14 The effect of exercise on peak oxygen consumption was investigated in 18 meta-  
15 analyses (reported in 17 articles) with a mild heterogeneity (average  $I^2=42.2\%$ ),[24, 25,  
16 27, 28, 30, 32, 34, 37, 38, 40, 41, 43, 44, 49, 50, 54] and 16 reported positive statistically  
17 significant outcomes. [24, 25, 28, 30, 32, 34, 37, 38, 40, 41, 43, 44, 47, 49, 50] Of the  
18 18 meta-analyses, three reported a low effect size,[27, 39, 50] nine reported a moderate  
19 effect size[25, 28, 32, 34, 37, 41, 43, 44, 49] and three reported a large effect size.[24,  
20 38, 47] GRADE assessment of quality indicated the overall evidence as being very low  
21 (9 meta-analyses[25, 27, 28, 30, 32, 37, 43, 47, 49]), low (8 meta-analyses[24, 34, 38-  
22 41, 44, 50]), and high (one meta-analysis[37]). A meta-analysis that included  
23 kidney transplant recipients found no statistically significant difference in the SMD of  
24 the exercise group (0.38; 95% CI, -0.06 to 0.82;  $P=0.09$ ).[39]

25 The effect of exercise on the 6-minute walk test was investigated in 14 meta-analyses  
26 (reported in 13 articles) with a mild heterogeneity (average  $I^2=44.9\%$ ),[25, 28-30, 32,  
27 34, 36-38, 40, 41, 43, 51] and 13 reported positive statistically significant outcomes.[25,  
28 28-30, 32, 34, 36-38, 41, 43, 51] Of the 14 meta-analyses, two reported a small effect  
29 size,[25, 28] five reported a moderate effect size,[36, 37, 41, 43, 51] and three reported  
30 a large effect size.[32, 34, 38] GRADE assessment of quality indicated the overall  
31 evidence as being very low (eight meta-analyses[25, 30, 32, 34, 38, 40, 43]), low (four  
32 meta-analyses[28, 37, 41, 51]), and moderate (two meta-analyses[29, 36]). In addition,  
33 the meta-analysis by Heiwe et al. (2014) showed that regular exercise had significant  
34 beneficial effects on aerobic capacity. [10, 33]

## 35 **Muscle strength**

1 Ten meta-analyses (reported in nine articles) investigated the effects of exercise on  
2 muscle strength in CKD patients with a low heterogeneity (average  $I^2 = 19.1\%$ ). [10, 26,  
3 32, 33, 35-38, 51] The meta-analyses included a mean of seven studies (ranging from  
4 3 to 12) and a mean of 252 participants (ranging from 115 to 385) (**Table 3**).

5 Muscle strength was measured using handgrip strength and lower limb muscle strength.  
6 For patients in 8 of 10 meta-analyses, exercise resulted in statistically significant  
7 improvements in muscle strength. [10, 32, 33, 35-37, 51] Of the 10 meta-analyses, three  
8 reported a small effect size, [36, 38, 51] five reported a moderate effect size, [10, 32, 33,  
9 35, 36] and two reported a large effect size, [26, 37] GRADE assessment of quality  
10 indicated the overall evidence as being very low (six meta-analyses [10, 32, 33, 35, 37,  
11 38]) and low (four meta-analyses [26, 36, 51]).

### 12 **Muscle endurance**

13 Nine meta-analyses (reported in 8 articles) investigated the effects of exercise on  
14 muscle endurance with a mild heterogeneity (average  $I^2 = 29.4\%$ ). [10, 25, 33, 36, 38,  
15 40, 43, 51] An average of 238 participants (ranging from 106 to 461) from 5 studies  
16 (ranging from 3 to 7) were included in the meta-analysis (**Table 4**).

17 Muscle endurance was measured using a sit-to-stand test, timed up and go test, and  
18 walking capacity exercise. Pooled effect estimates from all nine meta-analyses  
19 suggested a beneficial effect of exercise on muscle endurance in CKD patients. Seven  
20 of the nine meta-analyses reported power to detect a statistically significant effect. [25,  
21 33, 36, 38, 43, 51] Two meta-analyses reported moderate effect size, and 5 reported  
22 small effect size. GRADE assessment of quality indicated the overall evidence as being  
23 very low (seven meta-analyses [25, 33, 36, 38, 40, 43, 51]), low (one meta-analyses [36])  
24 and moderate (one meta-analyses [10]).

### 25 **Body composition**

26 Four meta-analyses consisting of 9 studies (ranging from 4 to 13) and a mean of 335  
27 participants (ranging from 166 to 466) included body mass index as an outcome. [27,  
28 47, 49, 52] There was a low heterogeneity (average  $I^2 = 12.0\%$ ) among the study  
29 outcomes (**Table 5**).

30 Three of the four meta-analyses showed a positive statistically significant impact on  
31 body mass index using exercise interventions in CKD patients. [47, 49, 52] Small effect  
32 size was reported in all meta-analyses. GRADE assessment of quality indicated the  
33 overall evidence as being very low (one meta-analysis), low (two meta-analyses [47,  
34 49]), and moderate (one meta-analysis [52]).

### 35 **Dialysis-related symptoms**

1  
2  
3  
4 1 Nine meta-analyses (reported in seven articles) investigated the effect of exercise on  
5 2 dialysis-related symptoms in CKD patients.[30, 31, 34, 41, 43, 45, 53] Each meta-  
6 3 analysis included a mean of seven studies (ranging from 3 to 12 studies) and a mean of  
7 4 239 participants (ranging from 139 to 370). (**Table 6**).

8  
9  
10 5 Fatigue was measured using the Rhoten Fatigue Scale, Visual Analogue Scale, and  
11 6 Hemodialysis Patients Fatigue Scale. The effect of exercise on fatigue was investigated  
12 7 in 2 meta-analyses with a low heterogeneity (average  $I^2=23.5\%$ ).[45, 53] The two meta-  
13 8 analyses revealed a statistically significant effect of exercise on fatigue. Although the  
14 9 meta-analyses reported large effect size, the quality of evidence was low[45] or very  
15 10 low[53] according to GRADE criteria.

16  
17  
18  
19  
20 11 Just one meta-analysis investigated the effects of exercise on restless legs syndrome in  
21 12 CKD patients.[45] The results showed that pooled effect estimated for restless legs  
22 13 syndrome with statistically significant but considerable average heterogeneity  
23 14 ( $I^2 = 87.0\%$ ). According to GRADE criteria, the overall evidence for this outcome was  
24 15 very low.

## 26 16 **Dialysis adequacy**

27  
28  
29  
30 17 Dialysis adequacy was measured using the value of Kt/V. Six meta-analyses (reported  
31 18 in 5 articles) investigated the effects of exercise on Kt/V in CKD patients with a mild  
32 19 heterogeneity (average  $I^2 = 25.7\%$ ).[30, 31, 34, 41, 43] Comprehensive effect estimates  
33 20 from all the six meta-analyses with Kt/V outcomes showed that exercise had a  
34 21 beneficial effect. In three of the six meta-analyses, 3 reported a small effect size[34, 41,  
35 22 43], and one reported large effect size.[31] According to GRADE criteria, all meta-  
36 23 analyses were rated as very low-quality evidence (**Table 6**).

## 38 24 **Health-related quality of life**

39  
40  
41  
42  
43 25 Twenty-nine meta-analyses (reported in 13 articles) investigated the effect of exercise  
44 26 on HRQOL in CKD patients.[26, 28, 32, 34, 35, 37, 39-43, 51, 53] Among them, nine  
45 27 meta-analyses assessed the physical and mental subscale of the Short-Form Health  
46 28 Survey-36.[28, 32, 34, 37, 41-43, 51, 53] Each meta-analysis included an average of 6  
47 29 studies (ranging from 3 to 10) and 311 participants (ranging from 167 to 562). The  
48 30 included meta-analyses had moderate heterogeneity (average  $I^2 = 51.0\%$ ) (**Table 7**).

49  
50  
51  
52  
53 31 Of the 29 meta-analyses, a comprehensive effect estimate of the 28 meta-analyses  
54 32 shows that exercise is beneficial to the HRQOL of CKD patients, but only 12 of 29  
55 33 meta-analyses reported a statistically significant outcome.[28, 34, 37, 39, 41-43, 53]  
56 34 There were 13 of 29 meta-analyses reporting a small effect size, [28, 32, 34, 37, 41, 43,  
57 35 51, 53] 4 were moderate,[32, 37, 39, 41] and 6 were large.[26, 35, 42] According to

1 GRADE criteria, the overall of evidence for HRQOL was rated as very low (20 meta-  
2 analyses[32, 35, 37, 39-43, 53]) or low (nine meta-analyses[26, 28, 34, 41, 51, 53]).

### 3 **Adverse events**

4 Six meta-analyses reported exercise-related adverse events.[26, 28, 38, 41, 43, 44] Of  
5 the adverse effects, the most commonly reported were hypotension and cramping.  
6 Overall, the incidence of adverse events was approximately 0.3%.

## 7 **DISCUSSION**

### 8 **Summary of main results**

9 Several meta-analyses have been published on exercise interventions in CKD  
10 patients.[55] The findings of these meta-analyses should be assessed to determine if the  
11 evidence is consistent among the studies. This umbrella review included 31 eligible  
12 articles involving 120 separate meta-analyses investigating the effect of exercise on the  
13 health outcomes in CKD patients. There was low- or very low-quality evidence for  
14 moderate beneficial effects of exercise on cardiorespiratory fitness, muscle strength,  
15 and body composition. In addition, there was very low-quality evidence for minor  
16 beneficial effects of exercise on muscle endurance, cardiovascular risk factors, dialysis-  
17 related symptoms, and HRQOL. Few adverse events related to exercise indicate that  
18 exercise is safe for CKD patients.

### 19 **Interpretation of study effects**

20 Cardiovascular disease is a frequent complication of CKD and is the leading cause of  
21 death in CKD patients.[56] Hypertension is an important modifiable risk factor for  
22 cardiovascular diseases and progressive renal dysfunction in CKD patients.[57] The  
23 present overview showed that exercise has a small to moderate effect on blood pressure  
24 (SMD: -0.75 to 0.04 for systolic blood pressure and SMD: -0.47 to 0.04 for diastolic  
25 blood pressure); it is an appealing strategy for blood pressure control in CKD patients.  
26 However, the dose effects of exercise in the context of the cardiovascular health of  
27 CKD patients should be considered. A recent cohort study found that 7.5-15 metabolic  
28 equivalent hours per week (MET-h/week) was associated with the lowest risk of  
29 cardiovascular events.[58] Regrettably, the benefit of exercise on cardiovascular risk  
30 factors cannot be determined because there are an insufficient number of conclusive  
31 studies that assess exercise effects on overall cardiovascular health. In a systematic  
32 review by Heiwe et al., a meta-analysis including two trials found that exercise  
33 improved cardiovascular function in patients with CKD, as reflected in the standard  
34 deviation of all normal RR intervals and left ventricular mass index.[10] Furthermore,



1 a recent randomized controlled trial published by Graham-Brown indicated that  
2 intradialytic exercise could reduce left ventricular mass and is safe, deliverable, and  
3 well-tolerated.[59] Although the GRADE evidence was low, exercise should be  
4 recommended for CKD patients, particularly those comorbid with cardiovascular  
5 disease. Future randomized controlled exercise trials need to focus more on the role of  
6 exercise in cardiovascular events in patients with CKD.

7 Physical fitness is necessary for participation in activities of daily living. The exercise  
8 provided the best results in improving cardiorespiratory fitness and muscle strength in  
9 CKD patients, with more than half of the meta-analyses reporting moderate or large  
10 effect sizes, regardless of the quality of evidence. Cardiorespiratory fitness is  
11 considered a significant independent predictor of mortality, and muscle strength is an  
12 essential indicator of physical performance in CKD patients.[60] It is well known that  
13 aerobic exercise is the "gold standard" for cardiorespiratory rehabilitation[61] and  
14 resistance training for muscle strength improvement.[62] However, a combination of  
15 aerobic and resistance exercises may have a more profound effect on CKD patients  
16 based on the current review. Meta-analyses by Andrade et al. showed that combined  
17 training benefits cardiorespiratory fitness in CKD patients.[24]

18 Both sarcopenia and obesity have increased mortality risk and progression to end-stage  
19 renal disease in CKD patients.[63] Unlike patients receiving dialysis, treatment  
20 requirements for predialysis CKD patients are based on maintaining a "healthy weight"  
21 and preventing or attenuating obesity.[14] In this overview, the effectiveness of  
22 exercise for body mass index was supported by four analyses with small effect sizes  
23 and moderate quality of evidence. Based on the results, exercise may contribute to  
24 lower body mass index in CKD patients. However, additional studies are needed to  
25 confirm the benefits of exercise programs for reducing sarcopenia and weight.

26 CKD population experience multiple symptoms that affect the patient's prognosis and  
27 HRQOL.[64] Patients who received dialysis treatment commonly reported restless legs  
28 syndrome, fatigue, and inadequate dialysis due to kidney function deterioration and  
29 dialysis-related side effects.[65, 66] These symptoms affect sleep and daily activities  
30 and impose considerable psychological distress and economic burden.[67] An  
31 increasing number of researchers have investigated the role of exercise as an important  
32 non-pharmacological strategy for preventing and/or treating symptoms. [68, 69] The  
33 results of a small number of meta-analyses suggested the beneficial effect of exercise  
34 on dialysis adequacy (SMD: 0.19 to 2.21) and improving restless legs syndrome (SMD:  
35 -1.79) and fatigue symptoms (SMD: -0.97 to -0.85). Nevertheless, the efficacy of  
36 exercise in CKD patients for preventing dialysis-related symptoms awaits new clinical  
37 evidence.

1  
2  
3  
4 1 With similar results obtained in another overview that included chronic disease,[70]  
5 2 results from this overview demonstrated minor beneficial effects of exercise on  
6 3 HRQOL, irrespective of the evidence level in CKD patients. Improved HRQOL is vital  
7 4 because most of the population reported poor health and well-being due to diet  
8 5 restriction, weakness, and dialysis treatment.[71] The consistent health benefits of  
9 6 exercise in this overview demonstrated that exercise could be a strategy to improve the  
10 7 poor long-term prognosis in CKD patients.

11 8 Several meta-analyses reported exercise-related adverse events. Based on the reported  
12 9 adverse events, we calculate that only three adverse events occurred per 1000 CKD  
13 10 patients. The low incidence of adverse events indicated that the benefits of exercise in  
14 11 CKD patients outweigh its potential risks and most reflected typical response to  
15 12 exercise (e.g., muscle soreness). However, most meta-analyses only included  
16 13 intradialytic exercise for hemodialysis patients in their assessments. Exercises during  
17 14 hemodialysis are usually performed under the supervision of a healthcare worker to  
18 15 ensure safety.[72] It has been reported that all patients with CKD are at risk for  
19 16 cardiovascular events (e.g., arrhythmias, myocardial ischemia) during exercise.  
20 17 Therefore, medical screening should be performed before exercise to determine which  
21 18 patients may be at increased risk for cardiovascular accidents. [73] In addition, special  
22 19 attention should be paid to dry weight and blood pressure in patients with hemodialysis-  
23 20 dependent CKD to avoid excessive volume loading or dehydration, which may increase  
24 21 the risk associated with exercise. [60]

## 22 **Implications for clinical**

23 23 Taken together, there is good reason to recommend exercise for improving prognosis  
24 24 in CKD patients. Evidence from most randomized controlled trials increased  
25 25 confidence in the findings of this umbrella review. Because most of the meta-analyses  
26 26 assessed in this study did not detail the exercises instituted, it is difficult to make  
27 27 recommendations about the type of exercise that would be the most beneficial for CKD  
28 28 patients. Although exercise's effect sizes on improving CKD patients' health prognosis  
29 29 were generally moderate, these effects may bring some clinical benefit to patients  
30 30 experiencing impaired function or symptom distress. Despite numerous meta-analyses  
31 31 providing only low or very low-quality evidence, similar beneficial effects of exercise  
32 32 were reported by meta-analyses of randomized controlled trials with different grades of  
33 33 evidence. Remarkably, a recently published trial found that a 6-month intradialytic  
34 34 exercise program effectively reduces healthcare costs.[74] Overall, exercise should be  
35 35 integrated into the care of CKD, but the overall benefit of exercise to CKD is still  
36 36 debatable.

## 1 **Limitations**

2 This overview has several limitations. First, most meta-analyses included in this review  
3 involve hemodialysis patients, limiting the results' extrapolation to other CKD stages.  
4 Second, improvement of flexibility in CKD patients was not investigated. Flexibility is  
5 an important component of physical fitness that impacts muscular injury.[75] The  
6 evidence for the efficacy of exercise on flexibility improvement is insufficient for a  
7 systematic review or meta-analysis. Third, since the search strategy was limited to  
8 English, this review may have language bias. It is unknown whether meta-analyses  
9 published in other languages would affect the results of our study. Fourth, the results  
10 may be had been influenced by an overlap in the original studies. Fifth, the accuracy of  
11 the MD data cannot be guaranteed. Sixth, subgroup analyses of different types of  
12 exercise were not performed as described in the published protocol because most of the  
13 included meta-analyses did not detail the exercises. Seventh, both body composition  
14 and cardiovascular risk factors are common terms. However, the inclusion of studies  
15 was limited, so this review focused only on body mass index and blood pressure, and  
16 more evidence is still needed for the effects of other assessment metrics.

## 17 **CONCLUSION**

18 In CKD patients, exercise improves muscle strength, endurance, body composition, and  
19 HRQOL. At the same time, exercise decreases blood pressure and dialysis-related  
20 symptoms in CKD patients. However, the quality of the evidence was considered low  
21 or very low for all outcomes indicating that we have low certainty evidence to support  
22 the findings above. More rigorous study is still needed in the future. Nevertheless, given  
23 the health benefits of physical activity, exercise should be integrated into renal care for  
24 a patient with any stage of CKD.

## 25 **Contributors**

26 FZ and LYH conceived and designed the review. YB and XZ searched databases,  
27 extracted the data, and conducted the statistical analysis. WQZ revised the manuscript.  
28 WQW and HCZ provided technical support. All authors had read and approved the final  
29 manuscript and agreed on its submission.

## 30 **Ethics approval statement**

31 Ethics approval is not required as no private information from individuals is collected.

## 32 **Dissemination**

33 The results will be published in a peer-reviewed journal or disseminated in relevant

1 conferences.

2 **Funding** This study was supported by Longhua Hospital Shanghai University of  
3 Traditional Chinese Medicine (Grant number: Y21026).

4 **Competing interest statement** None declared.

5 **Data availability statement** All data relevant to the study are included in the article or  
6 uploaded as supplementary information.

7 **Patient consent for publication** Not required.

8 **Provenance and peer review** Not commissioned; externally peer reviewed.

## 9 REFERENCES

- 10 1. Zoccali C, Vanholder R, Massy ZA, Ortiz A, Sarafidis P, Dekker FW, Fliser D,  
11 Fouque D, Heine GH, Jager KJ *et al*: **The systemic nature of CKD**. *Nat Rev*  
12 *Nephrol* 2017, **13**(6):344-358.
- 13 2. **Global, regional, and national burden of chronic kidney disease, 1990-2017:**  
14 **a systematic analysis for the Global Burden of Disease Study 2017**. *Lancet*  
15 2020, **395**(10225):709-733.
- 16 3. Yang C, Gao B, Zhao X, Su Z, Sun X, Wang HY, Zhang P, Wang R, Liu J,  
17 Tang W *et al*: **Executive summary for China Kidney Disease Network (CK-**  
18 **NET) 2016 Annual Data Report**. *Kidney Int* 2020, **98**(6):1419-1423.
- 19 4. Cheng HT, Xu X, Lim PS, Hung KY: **Worldwide Epidemiology of Diabetes-**  
20 **Related End-Stage Renal Disease, 2000-2015**. *Diabetes Care* 2020.
- 21 5. Roshanravan B, Robinson-Cohen C, Patel KV, Ayers E, Littman AJ, de Boer  
22 IH, Ikizler TA, Himmelfarb J, Katznel LI, Kestenbaum B *et al*: **Association**  
23 **between physical performance and all-cause mortality in CKD**. *J Am Soc*  
24 *Nephrol* 2013, **24**(5):822-830.
- 25 6. Wang XH, Mitch WE: **Mechanisms of muscle wasting in chronic kidney**  
26 **disease**. *Nat Rev Nephrol* 2014, **10**(9):504-516.
- 27 7. Hoshino J: **Renal Rehabilitation: Exercise Intervention and Nutritional**  
28 **Support in Dialysis Patients**. *Nutrients* 2021, **13**(5):1444.
- 29 8. Wilund KR, Viana JL, Perez LM: **A Critical Review of Exercise Training in**  
30 **Hemodialysis Patients: Personalized Activity Prescriptions Are Needed**.  
31 *Exerc Sport Sci Rev* 2020, **48**(1):28-39.
- 32 9. Tentori F, Elder SJ, Thumma J, Pisoni RL, Bommer J, Fissell RB, Fukuhara S,  
33 Jadoul M, Keen ML, Saran R *et al*: **Physical exercise among participants in**  
34 **the Dialysis Outcomes and Practice Patterns Study (DOPPS): correlates**  
35 **and associated outcomes**. *Nephrol Dial Transplant* 2010, **25**(9):3050-3062.
- 36 10. Heiwe S, Jacobson SH: **Exercise training in adults with CKD: a systematic**  
37 **review and meta-analysis**. *Am J Kidney Dis* 2014, **64**(3):383-393.
- 38 11. Wong L, Duque G, McMahon LP: **Sarcopenia and Frailty: Challenges in**

- 1  
2  
3  
4  
5  
6  
7  
8  
9  
10  
11  
12  
13  
14  
15  
16  
17  
18  
19  
20  
21  
22  
23  
24  
25  
26  
27  
28  
29  
30  
31  
32  
33  
34  
35  
36  
37  
38  
39  
40  
41  
42  
43  
44  
45  
46  
47  
48  
49  
50  
51  
52  
53  
54  
55  
56  
57  
58  
59  
60
- 1 **Mainstream Nephrology Practice.** *Kidney Int Rep* 2021, **6**(10):2554-2564.
- 2 12. Rampersad C, Darcel J, Harasemiw O, Brar RS, Komenda P, Rigatto C, Prasad  
3 B, Bohm C, Tangri N: **Change in Physical Activity and Function in Patients  
4 with Baseline Advanced Nondialysis CKD.** *Clin J Am Soc Nephrol* 2021,  
5 **16**(12):1805-1812.
- 6 13. March DS, Graham-Brown MP, Young HM, Greenwood SA, Burton JO:  
7 **'There is nothing more deceptive than an obvious fact': more evidence for  
8 the prescription of exercise during haemodialysis (intradialytic exercise) is  
9 still required.** *Br J Sports Med* 2017, **51**(18):1379.
- 10 14. **Clinical Practice Guideline: Exercise and Lifestyle in Chronic Kidney  
11 Disease**  
12 [[https://renal.org/sites/renal.org/files/Exercise%20and%20Lifestyle%20in%20  
13 CKD%20clinical%20practice%20guideline33\\_v4\\_FINAL\\_0.pdf](https://renal.org/sites/renal.org/files/Exercise%20and%20Lifestyle%20in%20CKD%20clinical%20practice%20guideline33_v4_FINAL_0.pdf)]
- 14 15. Yamagata K, Hoshino J, Sugiyama H, Hanafusa N, Shibagaki Y, Komatsu Y,  
15 Konta T, Fujii N, Kanda E, Sofue T *et al*: **Clinical practice guideline for renal  
16 rehabilitation: Systematic reviews and recommendations of exercise  
17 therapies in patients with kidney diseases.** *Renal Replacement Therapy* 2019,  
18 **5**.
- 19 16. Deschamps T: **Let's programme exercise during haemodialysis  
20 (intradialytic exercise) into the care plan for patients, regardless of age.** *Br  
21 J Sports Med* 2016, **50**(22):1357-1358.
- 22 17. Shamseer L, Moher D, Clarke M, Ghersi D, Liberati A, Petticrew M, Shekelle  
23 P, Stewart LA: **Preferred reporting items for systematic review and meta-  
24 analysis protocols (PRISMA-P) 2015: elaboration and explanation.** *Bmj*  
25 2015, **350**:g7647.
- 26 18. Zhang F, Wang H, Huang L, Zhang H: **Therapeutic effects of exercise  
27 interventions for patients with chronic kidney disease: protocol for an  
28 overview of systematic reviews and meta-analyses of clinical trials.** *BMJ  
29 Open* 2021, **11**(2):e043011.
- 30 19. Shea BJ, Reeves BC, Wells G, Thuku M, Hamel C, Moran J, Moher D, Tugwell  
31 P, Welch V, Kristjansson E *et al*: **AMSTAR 2: a critical appraisal tool for  
32 systematic reviews that include randomised or non-randomised studies of  
33 healthcare interventions, or both.** *Bmj* 2017, **358**:j4008.
- 34 20. Grgic J, Grgic I, Pickering C, Schoenfeld BJ, Bishop DJ, Pedisic Z: **Wake up  
35 and smell the coffee: caffeine supplementation and exercise performance-  
36 an umbrella review of 21 published meta-analyses.** *Br J Sports Med* 2020,  
37 **54**(11):681-688.
- 38 21. Cohen J: **Quantitative methods in psychology: A power primer.**  
39 *Psychological Bulletin* 1992, **112**:115-159.
- 40 22. Higgins JP, Thompson SG, Deeks JJ, Altman DG: **Measuring inconsistency  
41 in meta-analyses.** *Bmj* 2003, **327**(7414):557-560.
- 42 23. Atkins D, Best D, Briss PA, Eccles M, Falck-Ytter Y, Flottorp S, Guyatt GH,  
43 Harbour RT, Haugh MC, Henry D *et al*: **Grading quality of evidence and  
44 strength of recommendations.** *Bmj* 2004, **328**(7454):1490.

- 1  
2  
3  
4  
5  
6  
7  
8  
9  
10  
11  
12  
13  
14  
15  
16  
17  
18  
19  
20  
21  
22  
23  
24  
25  
26  
27  
28  
29  
30  
31  
32  
33  
34  
35  
36  
37  
38  
39  
40  
41  
42  
43  
44  
45  
46  
47  
48  
49  
50  
51  
52  
53  
54  
55  
56  
57  
58  
59  
60
- 1 24. Andrade FP, Rezende PS, Ferreira TS, Borba GC, Muller AM, Rovedder PME: **Effects of intradialytic exercise on cardiopulmonary capacity in chronic kidney disease: systematic review and meta-analysis of randomized clinical trials.** *Sci Rep* 2019, **9**(1):18470.
- 2  
3  
4  
5  
6  
7  
8  
9  
10  
11  
12  
13  
14  
15  
16  
17  
18  
19  
20  
21  
22  
23  
24  
25  
26  
27  
28  
29  
30  
31  
32  
33  
34  
35  
36  
37  
38  
39  
40  
41  
42  
43  
44  
45  
46  
47  
48  
49  
50  
51  
52  
53  
54  
55  
56  
57  
58  
59  
60
25. Bogataj S, Pajek M, Pajek J, Buturovic Ponikvar J, Paravlic A: **Exercise-Based Interventions in Hemodialysis Patients: A Systematic Review with a Meta-Analysis of Randomized Controlled Trials.** *J Clin Med* 2019, **9**(1).
26. Cheema BS, Chan D, Fahey P, Atlantis E: **Effect of progressive resistance training on measures of skeletal muscle hypertrophy, muscular strength and health-related quality of life in patients with chronic kidney disease: a systematic review and meta-analysis.** *Sports Med* 2014, **44**(8):1125-1138.
27. Chen G, Gao L, Li X: **Effects of exercise training on cardiovascular risk factors in kidney transplant recipients: a systematic review and meta-analysis.** *Ren Fail* 2019, **41**(1):408-418.
28. Chung YC, Yeh ML, Liu YM: **Effects of intradialytic exercise on the physical function, depression and quality of life for haemodialysis patients: a systematic review and meta-analysis of randomised controlled trials.** *J Clin Nurs* 2017, **26**(13-14):1801-1813.
29. Clarkson MJ, Bennett PN, Fraser SF, Warmington SA: **Exercise interventions for improving objective physical function in patients with end-stage kidney disease on dialysis: a systematic review and meta-analysis.** *Am J Physiol Renal Physiol* 2019, **316**(5):F856-f872.
30. Ferrari F, Helal L, Dipp T, Soares D, Soldatelli A, Mills AL, Paz C, Tenorio MCC, Motta MT, Barcellos FC *et al*: **Intradialytic training in patients with end-stage renal disease: a systematic review and meta-analysis of randomized clinical trials assessing the effects of five different training interventions.** *J Nephrol* 2020, **33**(2):251-266.
31. Ferreira GD, Bohlke M, Correa CM, Dias EC, Orcy RB: **Does Intradialytic Exercise Improve Removal of Solutes by Hemodialysis? A Systematic Review and Meta-analysis.** *Arch Phys Med Rehabil* 2019, **100**(12):2371-2380.
32. Gomes Neto M, de Lacerda FFR, Lopes AA, Martinez BP, Saquetto MB: **Intradialytic exercise training modalities on physical functioning and health-related quality of life in patients undergoing maintenance hemodialysis: systematic review and meta-analysis.** *Clin Rehabil* 2018, **32**(9):1189-1202.
33. Heiwe S, Jacobson SH: **Exercise training for adults with chronic kidney disease.** *Cochrane Database Syst Rev* 2011(10):Cd003236.
34. Huang M, Lv A, Wang J, Xu N, Ma G, Zhai Z, Zhang B, Gao J, Ni C: **Exercise Training and Outcomes in Hemodialysis Patients: Systematic Review and Meta-Analysis.** *Am J Nephrol* 2019, **50**(4):240-254.
35. Ju H, Chen H, Mi C, Chen Y, Zuang C: **The Impact of Home-Based Exercise Program on Physical Function of Chronic Kidney Disease Patients: A Meta-Analysis of Randomized Controlled Trials.** *Physikalische Medizin, Rehabilitationsmedizin, Kurortmedizin* 2020, **30**(02):108-114.

- 1  
2  
3  
4  
5  
6  
7  
8  
9  
10  
11  
12  
13  
14  
15  
16  
17  
18  
19  
20  
21  
22  
23  
24  
25  
26  
27  
28  
29  
30  
31  
32  
33  
34  
35  
36  
37  
38  
39  
40  
41  
42  
43  
44  
45  
46  
47  
48  
49  
50  
51  
52  
53  
54  
55  
56  
57  
58  
59  
60
- 1 36. Lu Y, Wang Y, Lu Q: **Effects of Exercise on Muscle Fitness in Dialysis Patients: A Systematic Review and Meta-Analysis.** *Am J Nephrol* 2019, **50(4):291-302.**
- 2  
3  
4 37. Matsuzawa R, Hoshi K, Yoneki K, Harada M, Watanabe T, Shimoda T, Yamamoto S, Matsunaga A: **Exercise Training in Elderly People Undergoing Hemodialysis: A Systematic Review and Meta-analysis.** *Kidney Int Rep* 2017, **2(6):1096-1110.**
- 5  
6  
7  
8 38. Nakamura K, Sasaki T, Yamamoto S, Hayashi H, Ako S, Tanaka Y: **Effects of exercise on kidney and physical function in patients with non-dialysis chronic kidney disease: a systematic review and meta-analysis.** *Sci Rep* 2020, **10(1):18195.**
- 9  
10  
11  
12 39. Oguchi H, Tsujita M, Yazawa M, Kawaguchi T, Hoshino J, Kohzuki M, Ito O, Yamagata K, Shibagaki Y, Sofue T: **The efficacy of exercise training in kidney transplant recipients: a meta-analysis and systematic review.** *Clin Exp Nephrol* 2019, **23(2):275-284.**
- 13  
14  
15  
16 40. Pei G, Tang Y, Tan L, Tan J, Ge L, Qin W: **Aerobic exercise in adults with chronic kidney disease (CKD): a meta-analysis.** *Int Urol Nephrol* 2019, **51(10):1787-1795.**
- 17  
18  
19 41. Pu J, Jiang Z, Wu W, Li L, Zhang L, Li Y, Liu Q, Ou S: **Efficacy and safety of intradialytic exercise in haemodialysis patients: a systematic review and meta-analysis.** *BMJ Open* 2019, **9(1):e020633.**
- 20  
21  
22 42. Salhab N, Karavetian M, Kooman J, Fiaccadori E, El Khoury CF: **Effects of intradialytic aerobic exercise on hemodialysis patients: a systematic review and meta-analysis.** *J Nephrol* 2019, **32(4):549-566.**
- 23  
24  
25 43. Sheng K, Zhang P, Chen L, Cheng J, Wu C, Chen J: **Intradialytic exercise in hemodialysis patients: a systematic review and meta-analysis.** *Am J Nephrol* 2014, **40(5):478-490.**
- 26  
27  
28 44. Smart N, Steele M: **Exercise training in haemodialysis patients: a systematic review and meta-analysis.** *Nephrology (Carlton)* 2011, **16(7):626-632.**
- 29  
30 45. Song YY, Hu RJ, Diao YS, Chen L, Jiang XL: **Effects of Exercise Training on Restless Legs Syndrome, Depression, Sleep Quality, and Fatigue Among Hemodialysis Patients: A Systematic Review and Meta-analysis.** *J Pain Symptom Manage* 2018, **55(4):1184-1195.**
- 31  
32  
33 46. Thompson S, Wiebe N, Padwal RS, Gyenes G, Headley SAE, Radhakrishnan J, Graham M: **The effect of exercise on blood pressure in chronic kidney disease: A systematic review and meta-analysis of randomized controlled trials.** *PLoS One* 2019, **14(2):e0211032.**
- 34  
35  
36  
37 47. Vanden Wyngaert K, Van Craenenbroeck AH, Van Biesen W, Dhondt A, Tanghe A, Van Ginckel A, Celie B, Calders P: **The effects of aerobic exercise on eGFR, blood pressure and VO<sub>2</sub>peak in patients with chronic kidney disease stages 3-4: A systematic review and meta-analysis.** *PLoS One* 2018, **13(9):e0203662.**
- 38  
39  
40  
41  
42 48. Wu X, Yang L, Wang Y, Wang C, Hu R, Wu Y: **Effects of combined aerobic and resistance exercise on renal function in adult patients with chronic**

- 1  
2  
3  
4  
5  
6  
7  
8  
9  
10  
11  
12  
13  
14  
15  
16  
17  
18  
19  
20  
21  
22  
23  
24  
25  
26  
27  
28  
29  
30  
31  
32  
33  
34  
35  
36  
37  
38  
39  
40  
41  
42  
43  
44  
45  
46  
47  
48  
49  
50  
51  
52  
53  
54  
55  
56  
57  
58  
59  
60
- 1            **kidney disease: a systematic review and meta-analysis.** *Clin Rehabil* 2020,  
2            **34(7):851-865.**
- 3            49. Yamamoto R, Ito T, Nagasawa Y, Matsui K, Egawa M, Nanami M, Isaka Y,  
4            Okada H: **Efficacy of aerobic exercise on the cardiometabolic and renal**  
5            **outcomes in patients with chronic kidney disease: a systematic review of**  
6            **randomized controlled trials.** *J Nephrol* 2021, **34(1):155-164.**
- 7            50. Yang H, Wu X, Wang M: **Exercise Affects Cardiopulmonary Function in**  
8            **Patients with Chronic Kidney Disease: A Meta-Analysis.** *Biomed Res Int*  
9            2017, **2017:6405797.**
- 10           51. Zhang F, Zhou W, Sun Q, Zhai Y, Zhang Y, Su H, Wang Z: **Effects of**  
11           **intradialytic resistance exercises on physical performance, nutrient intake**  
12           **and quality of life among haemodialysis people: A systematic review and**  
13           **meta-analysis.** *Nurs Open* 2021, **8(2):529-538.**
- 14           52. Zhang L, Wang Y, Xiong L, Luo Y, Huang Z, Yi B: **Exercise therapy**  
15           **improves eGFR, and reduces blood pressure and BMI in non-dialysis CKD**  
16           **patients: evidence from a meta-analysis.** *BMC Nephrol* 2019, **20(1):398.**
- 17           53. Zhao QG, Zhang HR, Wen X, Wang Y, Chen XM, Chen N, Sun Y, Liu H, Lu  
18           PJ: **Exercise interventions on patients with end-stage renal disease: a**  
19           **systematic review.** *Clin Rehabil* 2019, **33(2):147-156.**
- 20           54. **!!! INVALID CITATION !!! .**
- 21           55. Clyne N, Anding-Rost K: **Exercise training in chronic kidney disease-effects,**  
22           **expectations and adherence.** *Clin Kidney J* 2021, **14(Suppl 2):ii3-ii14.**
- 23           56. Webster AC, Nagler EV, Morton RL, Masson P: **Chronic Kidney Disease.**  
24           *Lancet* 2017, **389(10075):1238-1252.**
- 25           57. Cheung AK, Chang TI, Cushman WC, Furth SL, Ix JH, Pecoits-Filho R,  
26           Perkovic V, Sarnak MJ, Tobe SW, Tomson CRV *et al*: **Blood pressure in**  
27           **chronic kidney disease: conclusions from a Kidney Disease: Improving**  
28           **Global Outcomes (KDIGO) Controversies Conference.** *Kidney Int* 2019,  
29           **95(5):1027-1036.**
- 30           58. Kuo CP, Tsai MT, Lee KH, Lin YP, Huang SS, Huang CC, Tseng WC, Tarng  
31           DC: **Dose-response effects of physical activity on all-cause mortality and**  
32           **major cardiorenal outcomes in chronic kidney disease.** *Eur J Prev Cardiol*  
33           2021.
- 34           59. Graham-Brown MPM, March DS, Young R, Highton PJ, Young HML,  
35           Churchward DR, Dungey M, Stensel DJ, Bishop NC, Brunskill NJ *et al*: **A**  
36           **randomized controlled trial to investigate the effects of intra-dialytic**  
37           **cycling on left ventricular mass.** *Kidney International* 2021.
- 38           60. Zelle DM, Klaassen G, van Adrichem E, Bakker SJ, Corpeleijn E, Navis G:  
39           **Physical inactivity: a risk factor and target for intervention in renal care.**  
40           *Nat Rev Nephrol* 2017, **13(3):152-168.**
- 41           61. Mezzani A, Hamm LF, Jones AM, McBride PE, Moholdt T, Stone JA,  
42           Urhausen A, Williams MA: **Aerobic exercise intensity assessment and**  
43           **prescription in cardiac rehabilitation: a joint position statement of the**  
44           **European Association for Cardiovascular Prevention and Rehabilitation,**



- 1  
2  
3  
4  
5  
6  
7  
8  
9  
10  
11  
12  
13  
14  
15  
16  
17  
18  
19  
20  
21  
22  
23  
24  
25  
26  
27  
28  
29  
30  
31  
32  
33  
34  
35  
36  
37  
38  
39  
40  
41  
42  
43  
44  
45  
46  
47  
48  
49  
50  
51  
52  
53  
54  
55  
56  
57  
58  
59  
60
- 1        **the American Association of Cardiovascular and Pulmonary**  
2        **Rehabilitation and the Canadian Association of Cardiac Rehabilitation.**  
3        *Eur J Prev Cardiol* 2013, **20**(3):442-467.
- 4        62. Chan D, Cheema BS: **Progressive Resistance Training in End-Stage Renal**  
5        **Disease: Systematic Review.** *Am J Nephrol* 2016, **44**(1):32-45.
- 6        63. Androga L, Sharma D, Amodu A, Abramowitz MK: **Sarcopenia, obesity, and**  
7        **mortality in US adults with and without chronic kidney disease.** *Kidney Int*  
8        *Rep* 2017, **2**(2):201-211.
- 9        64. Weisbord SD, Fried LF, Arnold RM, Fine MJ, Levenson DJ, Peterson RA,  
10        Switzer GE: **Prevalence, severity, and importance of physical and emotional**  
11        **symptoms in chronic hemodialysis patients.** *J Am Soc Nephrol* 2005,  
12        **16**(8):2487-2494.
- 13        65. Flythe JE, Hilliard T, Castillo G, Ikeler K, Orazi J, Abdel-Rahman E, Pai AB,  
14        Rivara MB, St Peter WL, Weisbord SD *et al*: **Symptom Prioritization among**  
15        **Adults Receiving In-Center Hemodialysis: A Mixed Methods Study.** *Clin J*  
16        *Am Soc Nephrol* 2018, **13**(5):735-745.
- 17        66. Gregg LP, Bossola M, Ostrosky-Frid M, Hedayati SS: **Fatigue in CKD:**  
18        **Epidemiology, Pathophysiology, and Treatment.** *Clin J Am Soc Nephrol*  
19        2021.
- 20        67. Flythe JE, Dorough A, Narendra JH, Forfang D, Hartwell L, Abdel-Rahman E:  
21        **Perspectives on symptom experiences and symptom reporting among**  
22        **individuals on hemodialysis.** *Nephrol Dial Transplant* 2018, **33**(10):1842-  
23        1852.
- 24        68. Metzger M, Abdel-Rahman EM, Boykin H, Song MK: **A Narrative Review of**  
25        **Management Strategies for Common Symptoms in Advanced CKD.** *Kidney*  
26        *Int Rep* 2021, **6**(4):894-904.
- 27        69. Johansen KL: **The Promise and Challenge of Aerobic Exercise in People**  
28        **Undergoing Long-Term Hemodialysis.** *Clin J Am Soc Nephrol* 2021,  
29        **16**(4):505-507.
- 30        70. Fuller JT, Hartland MC, Maloney LT, Davison K: **Therapeutic effects of**  
31        **aerobic and resistance exercises for cancer survivors: a systematic review**  
32        **of meta-analyses of clinical trials.** *Br J Sports Med* 2018, **52**(20):1311.
- 33        71. Amir N, Tong A, McCarthy H, Howell M: **Trajectories of quality of life in**  
34        **chronic kidney disease: a novel perspective of disease progression.** *Nephrol*  
35        *Dial Transplant* 2021.
- 36        72. Parker K: **Intradialytic Exercise is Medicine for Hemodialysis Patients.** *Curr*  
37        *Sports Med Rep* 2016, **15**(4):269-275.
- 38        73. Smart NA, Williams AD, Levinger I, Selig S, Howden E, Coombes JS, Fassett  
39        RG: **Exercise & Sports Science Australia (ESSA) position statement on**  
40        **exercise and chronic kidney disease.** *J Sci Med Sport* 2013, **16**(5):406-411.
- 41        74. March DS, Hurt AW, Grantham CE, Churchward DR, Young HML, Highton  
42        PJ, Dungey M, Bishop NC, Smith AC, Graham-Brown MPM *et al*: **A Cost-**  
43        **Effective Analysis of the CYCLE-HD Randomized Controlled Trial.**  
44        *Kidney International Reports.*

- 1  
2  
3 1 75. Fuhrmann I, Krause R: **Principles of exercising in patients with chronic**  
4 **kidney disease, on dialysis and for kidney transplant recipients.** *Clin*  
5 **2**  
6 **3** *Nephrol* 2004, **61 Suppl 1**:S14-25.  
7  
8  
9

10  
11  
12  
13  
14  
15  
16  
17  
18  
19  
20  
21  
22  
23  
24  
25  
26  
27  
28  
29  
30  
31  
32  
33  
34  
35  
36  
37  
38  
39  
40  
41  
42  
43  
44  
45  
46  
47  
48  
49  
50  
51  
52  
53  
54  
55  
56  
57  
58  
59  
60

4

For peer review only

**Table 1 Summary of the effect of exercise on cardiovascular risk factor in CKD patients**

| Author (year)   | Design        | Stage of CKD | k (n)*  | Exercise type | Mode          | SMD or MD (95% CI)     | Effect size | P     | I <sup>2</sup> | GRADE |
|-----------------|---------------|--------------|---------|---------------|---------------|------------------------|-------------|-------|----------------|-------|
| <b>SBP</b>      |               |              |         |               |               |                        |             |       |                |       |
| Pei (2019)      | RCT/quasi-RCT | Mixed        | 12(514) | AE            | -             | MD:-2.91 (-6.68, 0.87) | -           | 0.13  | 40.0%          | ⊕⊕○○  |
| Wu (2020)       | RCT/quasi-RCT | Predialysis  | 3 (204) | AE+RT         | -             | SMD:-0.19(-0.46,0.08)  | Small       | 0.16  | 50.0%          | ⊕○○○  |
| Chen (2019)     | RCT           | KTRs         | 5(198)  | Mixed         | -             | SMD:0.18(-0.10,0.46)   | Small       | 0.21  | 0.0%           | ⊕○○○  |
| Pu (2019)       | RCT           | HD           | 7(287)  | Mixed         | Intradialytic | SMD:-0.28(-0.52,-0.05) | Small       | 0.02  | 0.0%           | ⊕○○○  |
| Yamamoto (2021) | RCT           | Predialysis  | 10(392) | AE            | -             | SMD:-0.75(-1.24,-0.26) | Moderate    | 0.003 | 80.3%          | ⊕○○○  |
| Thompson (2019) | RCT           | Predialysis  | 10(335) | Mixed         | -             | MD:-4.30(-9.00,0.40)   | -           | N.P.  | 50.4%          | ⊕○○○  |
| Zhang (2019)    | RCT           | Predialysis  | 14(463) | Mixed         | -             | SMD:-0.41(-0.70,-0.11) | Small       | 0.007 | 55.0%          | ⊕⊕⊕○  |
| Huang (2019)    | RCT           | HD           | 7(260)  | Mixed         | Mixed         | SMD:-0.17(-0.41,0.08)  | Small       | 0.18  | 8.0%           | ⊕⊕○○  |
| Heiwe (2011)    | RCT/quasi-RCT | Mixed        | 9(347)  | Mixed         | -             | SMD:0.25(0.04,0.47)    | Small       | 0.02  | 0.0%           | ⊕○○○  |
| Heiwe (2014)    | RCT           | HD           | 10(312) | Mixed         | -             | SMD:0.04(-0.34,0.41)   | Small       | 0.8   | 58.0%          | ⊕○○○  |
| Sheng (2014)    | RCT           | HD           | 7(296)  | Mixed         | Intradialytic | SMD:-0.27(-0.50,-0.04) | Small       | 0.02  | 0.0%           | ⊕○○○  |
| Ferrari (2019)  | RCT           | HD           | 10(332) | AE            | Intradialytic | MD:-10.07(16.35,-3.78) | -           | 0.002 | 44.0%          | ⊕○○○  |
| Wyngaert (2018) | RCT           | Predialysis  | 8(269)  | AE            | -             | SMD:0.08(-0.58,0.74)   | Small       | 0.81  | 84%            | ⊕○○○  |
| <b>DBP</b>      |               |              |         |               |               |                        |             |       |                |       |
| Pei (2019)      | RCT/quasi-RCT | Mixed        | 12(514) | AE            | -             | MD:-1.11 (-3.41, 1.20) | -           | 0.35  | 0.0%           | ⊕⊕○○  |
| Wu (2020)       | RCT/quasi-RCT | Predialysis  | 4 (194) | AE+RT         | -             | SMD:-0.47(-1.10,0.15)  | Small       | 0.14  | 70.0%          | ⊕○○○  |
| Chen (2019)     | RCT           | KTRs         | 5(198)  | Mixed         | -             | SMD:0.04(-0.45,0.52)   | Small       | 0.89  | 59.0%          | ⊕○○○  |
| Pu (2019)       | RCT           | HD           | 7(287)  | Mixed         | Intradialytic | SMD:-0.32(-0.55,-0.08) | Small       | 0.008 | 42.0%          | ⊕○○○  |
| Thompson (2019) | RCT           | Predialysis  | 8(303)  | Mixed         | -             | MD:-1.18(-4.76,2.40)   | -           | N.P.  | 60.5%          | ⊕○○○  |

|                  |               |             |         |       |               |                        |       |      |       |      |
|------------------|---------------|-------------|---------|-------|---------------|------------------------|-------|------|-------|------|
| Zhang (2019)     | RCT           | Predialysis | 12(399) | Mixed | -             | SMD:-0.31(-0.71,0.08)  | Small | 0.12 | 70.0% | ⊕⊕○○ |
| Huang (2019)     | RCT           | HD          | 7(260)  | Mixed | Mixed         | SMD:-0.23(-0.69,0.24)  | Small | 0.34 | 68.0% | ⊕○○○ |
| Heiwe (2011)     | RCT/quasi-RCT | Mixed       | 11(419) | Mixed | -             | SMD:0.16(-0.04,0.36)   | Small | 0.11 | 40.0% | ⊕○○○ |
| Heiwe (2014)     | RCT           | HD          | 10(212) | Mixed | Mixed         | SMD:0.17(-0.16,0.49)   | Small | 0.3  | 45.0% | ⊕⊕○○ |
| Sheng (2014)     | RCT           | HD          | 7(296)  | Mixed | Intradialytic | SMD:-0.24(-0.47,-0.01) | Small | 0.04 | 52.1% | ⊕○○○ |
| Ferrari (2019)   | RCT           | HD          | 10(334) | AE    | Intradialytic | MD:-2.96(-7.71,1.78)   | -     | 0.22 | 0.0%  | ⊕○○○ |
| Wynngaert (2018) | RCT           | Predialysis | 7(237)  | AE    | -             | SMD-0.09(-0.78,0.59)   | Small | 0.79 | 83%   | ⊕○○○ |

Abbreviation: RCT = randomized controlled trial; AE = aerobic exercise; RT = resistance training; DBP = diastolic blood pressure; SBP = systolic blood pressure; SMD = standardized mean difference; MD = mean difference; HD = hemodialysis; KTRs = kidney transplant recipients; GRADE = Grading of Recommendations Assessment, Development, and Evaluation; N.P. = no report.

\*Number of included studies and corresponding sample size.

Mixed means aerobic exercise combined with resistance training.

Table 2 Summary of the effect of exercise on cardiopulmonary fitness in CKD patients

| Author (year)       | Design         | Stage of CKD | k (n)*  | Exercise type | Mode          | SMD or MD (95% CI)   | Effect size | P      | I <sup>2</sup> | GRADE |
|---------------------|----------------|--------------|---------|---------------|---------------|----------------------|-------------|--------|----------------|-------|
| VO <sub>2peak</sub> |                |              |         |               |               |                      |             |        |                |       |
| Pei (2019)          | RCT/quasi-RCT  | Mixed        | 17(464) | AE            | -             | MD:2.08(1.10,3.05)   | -           | <0.001 | 25.0%          | ⊕⊕○○  |
| Nakamura (2020)     | RCT/cross-over | Predialysis  | 10(401) | Mixed         | -             | SMD:0.88(0.53,1.23)  | Large       | <0.001 | 56.0%          | ⊕⊕○○  |
| Chen (2019)         | RCT            | KTRs         | 6(202)  | Mixed         | -             | SMD:0.33(-0.02,0.69) | Small       | 0.06   | 27.0%          | ⊕○○○  |
| Andrade (2019)      | RCT            | HD           | 5(201)  | AE+RT         | Intradialytic | SMD:1.01(0.71,1.30)  | Large       | <0.001 | 0.0%           | ⊕⊕○○  |
| Chung (2016)        | RCT            | HD           | 6(238)  | Mixed         | Intradialytic | SMD:0.55(0.18,0.92)  | Moderate    | 0.003  | 52.9%          | ⊕○○○  |
| Pu (2019)           | RCT            | HD           | 10(400) | Mixed         | Intradialytic | SMD:0.57(0.23,0.90)  | Moderate    | <0.001 | 59.0%          | ⊕⊕○○  |
| Yamamoto (2021)     | RCT            | Predialysis  | 10(365) | AE            | -             | SMD:0.54(0.29,0.78)  | Moderate    | <0.001 | 24.6%          | ⊕○○○  |
| Yang (2017)         | RCT            | Mixed        | 5(179)  | Mixed         | -             | SMD:0.33(0.03,0.63)  | Small       | 0.003  | 47.0%          | ⊕⊕○○  |
| Huang (2019)        | RCT            | HD           | 10(371) | Mixed         | Mixed         | SMD:0.73(0.52,0.95)  | Moderate    | <0.001 | 71.0%          | ⊕⊕○○  |
| Matsuzawa (2017)    | RCT            | HD           | 18(582) | Mixed         | Mixed         | SMD:0.62(0.38,0.87)  | Moderate    | <0.001 | 49.0%          | ⊕⊕⊕⊕  |
| Smart (2011)        | RCT            | HD           | 8(365)  | Mixed         | Mixed         | SMD:0.75(0.39,1.11)  | Moderate    | <0.001 | 60.0%          | ⊕⊕○○  |
| Bogataj (2020)      | RCT            | HD           | 20(504) | Mixed         | Mixed         | SMD:0.58(0.32,0.85)  | Moderate    | <0.001 | 57.4%          | ⊕○○○  |
| Sheng (2014)        | RCT            | HD           | 7(310)  | Mixed         | Intradialytic | SMD:0.53(0.30,0.76)  | Moderate    | <0.001 | 36.0%          | ⊕○○○  |
| Neto (2018)         | RCT            | HD           | 10(394) | Mixed         | Intradialytic | SMD:0.60(0.15,1.04)  | Moderate    | 0.008  | 76.0%          | ⊕○○○  |
| Ferrari (2019)      | RCT            | HD           | 5(201)  | AE+RT         | Intradialytic | MD:5.41(4.03,6.79)   | -           | <0.001 | 0.0%           | ⊕○○○  |
| Ferrari (2019)      | RCT            | HD           | 7(248)  | AE            | Intradialytic | MD:2.07(0.42,3.72)   | -           | <0.001 | 0.0%           | ⊕○○○  |
| Wyngaert (2018)     | RCT            | Predialysis  | 11(325) | AE            | -             | SMD:0.99(0.49,1.48)  | Large       | <0.001 | 74.0%          | ⊕○○○  |
| Oguchi (2018)       | RCT            | KTRs         | 4(182)  | Mixed         | -             | SMD:0.38(-0.06,0.82) | Small       | 0.09   | 45.0%          | ⊕⊕○○  |
| 6MWT                |                |              |         |               |               |                      |             |        |                |       |

|                  |                |             |         |       |               |                        |          |        |       |      |
|------------------|----------------|-------------|---------|-------|---------------|------------------------|----------|--------|-------|------|
| Pei (2019)       | RCT/quasi-RCT  | Mixed       | 8 (496) | AE    | -             | MD:0.04 (-0.52, 0.59)  | -        | 0.90   | 86.0% | ⊕○○○ |
| Nakamura (2020)  | RCT/cross-over | Predialysis | 5(392)  | Mixed | -             | SMD:1.04(0.17,1.90)    | Large    | 0.02   | 92.0% | ⊕○○○ |
| Lu (2019)        | RCT            | Dialysis    | 11(300) | Mixed | Mixed         | SMD:0.52(0.31,0.72)    | Moderate | <0.001 | 39.0% | ⊕⊕⊕○ |
| Chung (2016)     | RCT            | HD          | 4(127)  | Mixed | Intradialytic | SMD:0.44(0.09,0.80)    | Small    | 0.015  | 0.0%  | ⊕⊕○○ |
| Zhang (2021)     | RCT            | HD          | 8(299)  | RT    | Intradialytic | SMD:0.52(0.28,0.75)    | Moderate | <0.001 | 18.7% | ⊕⊕○○ |
| Pu (2019)        | RCT            | HD          | 7(219)  | Mixed | Intradialytic | SMD:0.57(0.30,0.84)    | Moderate | <0.001 | 0.0%  | ⊕⊕○○ |
| Clarkson (2019)  | RCT            | Dialysis    | 18(744) | Mixed | -             | MD:33.64(23.74,43.54)  | -        | <0.001 | 0.0%  | ⊕⊕⊕○ |
| Huang (2019)     | RCT            | HD          | 7(205)  | Mixed | Mixed         | SMD:1.01(0.26,1.76)    | Large    | 0.008  | 83.0% | ⊕○○○ |
| Matsuzawa (2017) | RCT            | HD          | 10(326) | Mixed | Mixed         | SMD:0.58(0.24,0.93)    | Moderate | <0.001 | 53.0% | ⊕⊕○○ |
| Bogataj (2020)   | RCT            | HD          | 19      | Mixed | Mixed         | SMD:0.44(0.21,0.67)    | Small    | <0.001 | 49.6% | ⊕○○○ |
| Sheng (2014)     | RCT            | HD          | 4(146)  | Mixed | Intradialytic | SMD:0.58(0.23,0.93)    | Moderate | <0.001 | 89.7% | ⊕○○○ |
| Neto (2018)      | RCT            | HD          | 6(158)  | Mixed | Intradialytic | SMD:0.96(0.11,1.80)    | Large    | 0.03   | 82.0% | ⊕○○○ |
| Ferrari (2019)   | RCT            | HD          | 6(211)  | RT    | Intradialytic | MD:68.5(29.05,107.96)  | -        | <0.001 | 36.0% | ⊕○○○ |
| Ferrari (2019)   | RCT            | HD          | 6(188)  | AE    | Intradialytic | MD:64.98(43.86,86.11)  | -        | <0.001 | 0.0%  | ⊕○○○ |
| Aerobic capacity |                |             |         |       |               |                        |          |        |       |      |
| Heiwe (2011)     | RCT/quasi-RCT  | Mixed       | 24(847) | Mixed | -             | SMD:-0.56(-0.70,-0.42) | Moderate | <0.001 | 12.0% | ⊕○○○ |
| Heiwe (2014)     | RCT            | HD          | 21(374) | Mixed | Mixed         | SMD:-0.80(-1.02,-0.58) | Large    | <0.001 | 0.0%  | ⊕⊕○○ |

Abbreviation: RCT = randomized controlled trial; AE = aerobic exercise; RT = resistance training;  $VO_{2peak}$  = peak oxygen uptake; 6MWT = 6 minutes walk test; SMD = standardized mean difference; MD = mean difference; HD = hemodialysis; KTRs = kidney transplant recipients; GRADE = Grading of Recommendations Assessment, Development, and Evaluation.

\*Number of included studies and corresponding sample size.

Mixed means aerobic exercise combined with resistance training.

Table 3 Summary of the effect of exercise on muscle strength in CKD patients

| Author(year)     | Design         | Stage of CKD | k (n)*  | Exercise type | Mode          | SMD or MD(95% CI)      | Effect size | P      | I <sup>2</sup> | GRADE |
|------------------|----------------|--------------|---------|---------------|---------------|------------------------|-------------|--------|----------------|-------|
| Cheema (2014)    | RCT            | Predialysis  | 7(249)  | RT            | -             | SMD:1.15(0.80,1.49)    | Large       | 0.161  | 35.0%          | ⊕⊕○○  |
| Nakamura (2020)  | RCT/cross-over | Predialysis  | 4(119)  | Mixed         | -             | SMD:0.35(-0.03,0.73)   | Small       | 0.07   | 7.0%           | ⊕○○○  |
| Lu (2019)        | RCT            | Dialysis     | 5(234)  | Mixed         | Mixed         | SMD:0.59(0.20,0.98)    | Moderate    | 0.003  | 52.0%          | ⊕⊕○○  |
| Lu (2019)        | RCT            | Dialysis     | 7(224)  | Mixed         | Mixed         | SMD:0.47(0.20,0.74)    | Small       | <0.001 | 0.0%           | ⊕⊕○○  |
| Zhang (2021)     | RCT            | HD           | 6(300)  | RT            | Intradialytic | SMD:0.35(0.12,0.58)    | Small       | 0.003  | 41.6%          | ⊕⊕○○  |
| Heiwe (2011)     | RCT/quasi-RCT  | Mixed        | 9(358)  | Mixed         | -             | SMD:-0.52(-0.73,-0.31) | Moderate    | <0.001 | 0.0%           | ⊕○○○  |
| Heiwe (2014)     | RCT            | HD           | 12(385) | Mixed         | Mixed         | SMD:-0.56(-0.77,-0.35) | Moderate    | <0.001 | 0.0%           | ⊕○○○  |
| Matsuzawa (2017) | RCT            | HD           | 9(281)  | Mixed         | Mixed         | SMD:0.94(0.67,1.21)    | Large       | <0.001 | 10.0%          | ⊕○○○  |
| Neto (2018)      | RCT            | HD           | 9(250)  | Mixed         | Intradialytic | SMD:0.61(0.39,0.83)    | Moderate    | <0.001 | 58.9%          | ⊕○○○  |
| Ju (2020)        | RCT            | Mixed        | 3(115)  | Mixed         | -             | SMD:0.52(0.14,0.89)    | Moderate    | 0.007  | 0.0%           | ⊕○○○  |

Abbreviation: RCT = randomized controlled trial; RT = resistance training; SMD = standardized mean difference; MD = mean difference; HD = hemodialysis; GRADE = Grading of Recommendations Assessment, Development, and Evaluation.

\*Number of included studies and corresponding sample size.

Mixed means aerobic exercise combined with resistance training.

**Table 4 Summary of the effect of exercise on muscle endurance in CKD patients**

| Author (year)   | Design         | Stage of CKD | k (n)* | Exercise type | Mode          | Outcome          | SMD or MD (95% CI)     | Effect size | <i>P</i> | <i>I</i> <sup>2</sup> | GRADE |
|-----------------|----------------|--------------|--------|---------------|---------------|------------------|------------------------|-------------|----------|-----------------------|-------|
| Lu (2019)       | RCT            | Dialysis     | 3(193) | Mixed         | Mixed         | STS 10           | MD:-4.69(-9.01,-0.38)  | -           | 0.028    | 72.2%                 | ⊕○○○  |
| Bogataj (2020)  | RCT            | HD           | 5(461) | Mixed         | -             | STS 10           | SMD:-0.55(-1.00,-0.09) | Moderate    | 0.019    | 71.6%                 | ⊕○○○  |
| Lu (2019)       | RCT            | Dialysis     | 6(240) | Mixed         | Mixed         | STS 30           | SMD:0.43(0.17,0.69)    | Small       | 0.001    | 2.0%                  | ⊕⊕○○  |
| Zhang (2021)    | RCT            | HD           | 5(164) | RT            | Intradialytic | STS 30           | SMD:0.42(0.11,0.74)    | Small       | 0.008    | 0.0%                  | ⊕○○○  |
| Sheng (2014)    | RCT            | HD           | 3(106) | Mixed         | Intradialytic | STS 60           | SMD:0.71(0.31,1.12)    | Moderate    | <0.001   | 0.0%                  | ⊕○○○  |
| Pei (2019)      | RCT/quasi-RCT  | Mixed        | 5(445) | AE            | -             | STS 60           | MD:2.08(1.1,3.05)      | -           | 0.98     | 82.0%                 | ⊕○○○  |
| Nakamura (2020) | RCT/cross-over | Predialysis  | 3(170) | Mixed         | -             | TUGT             | SMD:-0.42(-0.73,-0.11) | Small       | 0.007    | 0.0%                  | ⊕○○○  |
| Heiwe (2011)    | RCT/quasi-RCT  | Mixed        | 7(191) | Mixed         | -             | Walking capacity | SMD:-0.48(-0.79,-0.17) | Small       | 0.003    | 2.0%                  | ⊕○○○  |
| Heiwe (2014)    | RCT            | HD           | 7(174) | Mixed         | Mixed         | Walking capacity | SMD:-0.33(-0.67,0.01)  | Small       | 0.06     | 16.0%                 | ⊕⊕⊕○  |

Abbreviation: RCT = randomized controlled trial; AE = aerobic exercise; RT = resistance training; STS 10 = sit to stand 10 test; STS 30 = sit to stand 30 test; STS 60 = sit to stand 60 test; TUGT = timed up and go test; SMD = standardized mean difference; MD = mean difference; HD = hemodialysis; GRADE = Grading of Recommendations Assessment, Development, and Evaluation.

\*Number of included studies and corresponding sample size.

Mixed means aerobic exercise combined with resistance training.



**Table 5 Summary of the effect of exercise on body composition in CKD patients**

| Author (year)   | Design | Stage of CKD | k (n)*  | Exercise type | Mode | SMD (95% CI)           | Effect size | <i>P</i> | <i>I</i> <sup>2</sup> | GRADE |
|-----------------|--------|--------------|---------|---------------|------|------------------------|-------------|----------|-----------------------|-------|
| Chen (2019)     | RCT    | KTRs         | 4(166)  | Mixed         | -    | SMD:0.02(-0.28,0.33)   | Small       | 0.89     | 0.0%                  | ⊕○○○  |
| Yamamoto (2021) | RCT    | Predialysis  | 10(414) | AE            | -    | SMD:-0.19(-0.38,-0.00) | Small       | 0.026    | 0.0%                  | ⊕⊕○○  |
| Zhang (2019)    | RCT    | Predialysis  | 13(466) | Mixed         | -    | SMD:-0.21(-0.39,-0.03) | Small       | 0.02     | 0.0%                  | ⊕⊕⊕○  |
| Wyngaert (2018) | RCT    | Predialysis  | 9(294)  | AE            | -    | SMD:-0.36(-0.60,-0.13) | Small       | 0.002    | 48.0%                 | ⊕⊕○○  |

Abbreviation: RCT = randomized controlled trial; AE = aerobic exercise; SMD = standardized mean difference; KTRs = kidney transplant recipients;;GRADE = Grading of Recommendations Assessment, Development, and Evaluation.

\*Number of included studies and corresponding sample size.

Mixed means aerobic exercise combined with resistance training.

**Table 6 Summary of the effect of exercise on dialysis-related symptoms in CKD patients**

| Author (year)   | Design        | Stage of CKD | k (n)*  | Exercise type | Mode          | Outcomes | SMD or MD(95% CI)      | Effect size | <i>P</i> | <i>I</i> <sup>2</sup> | GRADE |
|-----------------|---------------|--------------|---------|---------------|---------------|----------|------------------------|-------------|----------|-----------------------|-------|
| Ferreira (2019) | RCT/quasi-RCT | HD           | 10(346) | AE            | Intradialytic | Kt/V     | SMD:2.21(1.17,3.25)    | Large       | <0.001   | 92.0%                 | ⊕○○○  |
| Pu (2019)       | RCT           | HD           | 10(301) | Mixed         | Intradialytic | Kt/V     | SMD:0.29(0.06,0.52)    | Small       | 0.01     | 0.0%                  | ⊕○○○  |
| Huang (2019)    | RCT           | HD           | 8(257)  | Mixed         | Mixed         | Kt/V     | SMD:0.19(-0.06,0.43)   | Small       | 0.14     | 0.0%                  | ⊕○○○  |
| Sheng (2014)    | RCT           | HD           | 7(233)  | Mixed         | Intradialytic | Kt/V     | SMD:0.27(0.01,0.53)    | Small       | 0.04     | 0.0%                  | ⊕○○○  |
| Ferrari (2019)  | RCT           | HD           | 12(370) | AE            | Intradialytic | Kt/V     | MD:0.08(0.0,0.15)      | -           | 0.04     | 56.0%                 | ⊕○○○  |
| Ferrari (2019)  | RCT           | HD           | 6(220)  | RT            | Intradialytic | Kt/V     | MD:0.10(0.0,0.2)       | -           | 0.06     | 6.0%                  | ⊕○○○  |
| Song (2018)     | RCT           | HD           | 4(141)  | Mixed         | Mixed         | RLS      | SMD:-1.79(-2.21,-1.37) | Large       | <0.001   | 87.0%                 | ⊕○○○  |
| Song (2018)     | RCT           | HD           | 3(139)  | Mixed         | Mixed         | Fatigue  | SMD:-0.85(-1.20,-0.50) | Large       | <0.001   | 0.0%                  | ⊕○○○  |
| Zhao (2019)     | RCT           | Dialysis     | 3(141)  | Mixed         | -             | Fatigue  | SMD:-0.97(-1.32,-0.62) | Large       | <0.001   | 47.0%                 | ⊕⊕○○  |

Abbreviation: RCT = randomized controlled trial; AE = aerobic exercise; RT = resistance training; SMD = standardized mean difference; MD = mean difference; HD = hemodialysis; KTRs = kidney transplant recipients; RLS = Restless Legs Syndrome; GRADE = Grading of Recommendations Assessment, Development, and Evaluation.

\*Number of included studies and corresponding sample size.

Mixed means aerobic exercise combined with resistance training.

**Table 7 Summary of the effect of exercise on health-related quality of lives in CKD patients**

| Author (year)    | Design        | Stage of CKD | k (n)*  | Exercise type | Mode          | Outcomes                  | SMD or MD (95% CI)   | Effect size | P      | I <sup>2</sup> | GRADE |
|------------------|---------------|--------------|---------|---------------|---------------|---------------------------|----------------------|-------------|--------|----------------|-------|
| Salhab (2019)    | RCT           | HD           | 5(282)  | AE            | Intradialytic | PCS                       | SMD:1.82(-0.92,4.55) | Large       | 0.19   | 98.0%          | ⊕○○○  |
| Chung (2016)     | RCT           | HD           | 6(229)  | Mixed         | Intradialytic | PCS                       | SMD:0.46(0.20,0.73)  | Small       | <0.001 | 1.90%          | ⊕⊕○○  |
| Zhang (2021)     | RCT           | HD           | 7(297)  | RT            | Intradialytic | PCS                       | SMD:0.23(-0.00,0.46) | Small       | 0.055  | 0.0%           | ⊕⊕○○  |
| Pu (2019)        | RCT           | HD           | 10(320) | Mixed         | Intradialytic | PCS                       | SMD:0.57(0.14,1.01)  | Moderate    | 0.01   | 70.0%          | ⊕○○○  |
| Zhao (2019)      | RCT           | Dialysis     | 5(186)  | Mixed         | -             | PCS                       | SMD:0.31(0.02,0.61)  | Small       | 0.04   | 46.0%          | ⊕⊕○○  |
| Huang (2019)     | RCT           | HD           | 7(263)  | Mixed         | Mixed         | PCS                       | SMD:0.34(0.09,0.59)  | Small       | 0.007  | 27.0%          | ⊕⊕○○  |
| Matsuzawa (2017) | RCT           | HD           | 9(264)  | Mixed         | Mixed         | PCS                       | SMD:0.53(0.52,0.82)  | Moderate    | <0.001 | 19.0%          | ⊕○○○  |
| Sheng (2014)     | RCT           | HD           | 7(256)  | Mixed         | Intradialytic | PCS                       | SMD:0.30(0.05,0.55)  | Small       | 0.02   | 39.5%          | ⊕○○○  |
| Neto (2018)      | RCT           | HD           | 7(187)  | Mixed         | Intradialytic | PCS                       | SMD:0.50(-0.19,1.18) | Moderate    | 0.16   | 62.0%          | ⊕○○○  |
| Salhab (2019)    | RCT           | HD           | 5(282)  | AE            | Intradialytic | MCS                       | SMD:1.02(0.31,1.73)  | Large       | 0.005  | 75.0%          | ⊕○○○  |
| Chung (2016)     | RCT           | HD           | 5(193)  | Mixed         | Intradialytic | MCS                       | SMD:0.23(-0.05,0.52) | Small       | 0.109  | 0.0%           | ⊕⊕○○  |
| Zhang (2021)     | RCT           | HD           | 7(297)  | RT            | Intradialytic | MCS                       | SMD:0.13(-0.10,0.36) | Small       | 0.082  | 46.5%          | ⊕⊕○○  |
| Pu (2019)        | RCT           | HD           | 8(219)  | Mixed         | Intradialytic | MCS                       | SMD:0.19(-0.09,0.46) | Small       | 0.18   | 30.0%          | ⊕⊕○○  |
| Zhao (2019)      | RCT           | Dialysis     | 5(186)  | Mixed         | -             | MCS                       | SMD:0.30(-0.20,0.80) | Small       | 0.24   | 64.0%          | ⊕○○○  |
| Huang (2019)     | RCT           | HD           | 7(263)  | Mixed         | Mixed         | MCS                       | SMD:0.27(0.02,0.51)  | Small       | 0.03   | 0.0%           | ⊕⊕○○  |
| Matsuzawa (2017) | RCT           | HD           | 8(228)  | Mixed         | Mixed         | MCS                       | SMD:0.14(-0.15,0.42) | Small       | 0.34   | 10.0%          | ⊕○○○  |
| Sheng (2014)     | RCT           | HD           | 5(167)  | Mixed         | Intradialytic | MCS                       | SMD:0.14(-0.16,0.43) | Small       | 0.37   | 14.8%          | ⊕○○○  |
| Neto (2018)      | RCT           | HD           | 7(185)  | Mixed         | Intradialytic | MCS                       | SMD:0.39(-0.19,0.98) | Small       | 0.19   | 50.0%          | ⊕○○○  |
| Pei (2019)       | RCT/quasi-RCT | Mixed        | 6(522)  | AE            | -             | Physical function (SF-36) | MD:8.36(-1.24,17.95) | -           | 0.09   | 76.0%          | ⊕○○○  |

|               |               |             |         |       |   |                                   |                       |          |       |       |      |
|---------------|---------------|-------------|---------|-------|---|-----------------------------------|-----------------------|----------|-------|-------|------|
| Pei (2019)    | RCT/quasi-RCT | Mixed       | 7(562)  | AE    | - | Physical role (SF-36)             | MD:14.65(1.47,27.84)  | -        | 0.03  | 78.0% | ⊕○○○ |
| Pei (2019)    | RCT/quasi-RCT | Mixed       | 6(447)  | AE    | - | Social function (SF-36)           | MD:8.24(-1.09,17.58)  | -        | 0.08  | 85.0% | ⊕○○○ |
| Pei (2019)    | RCT/quasi-RCT | Mixed       | 6(513)  | AE    | - | Pain (SF-36)                      | MD:5.94(1.65,10.23)   | -        | 0.007 | 49.0% | ⊕○○○ |
| Pei (2019)    | RCT/quasi-RCT | Mixed       | 7(562)  | AE    | - | General health (SF-36)            | MD:8.90(2.48,15.32)   | -        | 0.007 | 71.0% | ⊕○○○ |
| Pei (2019)    | RCT/quasi-RCT | Mixed       | 6(542)  | AE    | - | Mental health (SF-36)             | MD:7.30(-0.94,15.54)  | -        | 0.08  | 84.0% | ⊕○○○ |
| Cheema (2014) | RCT           | Predialysis | 6 (223) | RT    | - | HRQOL                             | SMD:0.83(0.51,1.16)   | Large    | 0.226 | 27.8% | ⊕⊕○○ |
| Oguchi (2018) | RCT           | KTRs        | 4(179)  | Mixed | - | HRQOL                             | SMD:0.54(0.02,1.07)   | Moderate | 0.04  | 58.0% | ⊕○○○ |
| Ju (2020)     | RCT           | Mixed       | 3 (387) | Mixed | - | Symptom/problem (KDQOL)           | SMD:1.92(-1.06,4.90)  | Large    | 0.21  | 99.0% | ⊕○○○ |
| Ju (2020)     | RCT           | Mixed       | 3 (387) | Mixed | - | Effects of kidney disease (KDQOL) | SMD:-3.69(-8.56,1.19) | Large    | 0.14  | 99.0% | ⊕○○○ |
| Ju (2020)     | RCT           | Mixed       | 3 (387) | Mixed | - | Burden of kidney disease (KDQOL)  | SMD:1.04 (-0.75,2.82) | Large    | 0.26  | 98.0% | ⊕○○○ |

Abbreviation: RCT = randomized controlled trial; AE = aerobic exercise; RT = resistance training; COM = combine; HRQOL = health-related quality of life; PCS = physical component summary; MCS = mental component summary; SMD = standardized mean difference; MD = mean difference; HD = hemodialysis; KTRs = kidney transplant recipients; SF-36 = Short-Form Health Survey-36; KDQOL = kidney disease quality of life; GRADE = Grading of Recommendations Assessment, Development, and Evaluation.

\*Number of included studies and corresponding sample size.

Mixed means aerobic exercise combined with resistance training.

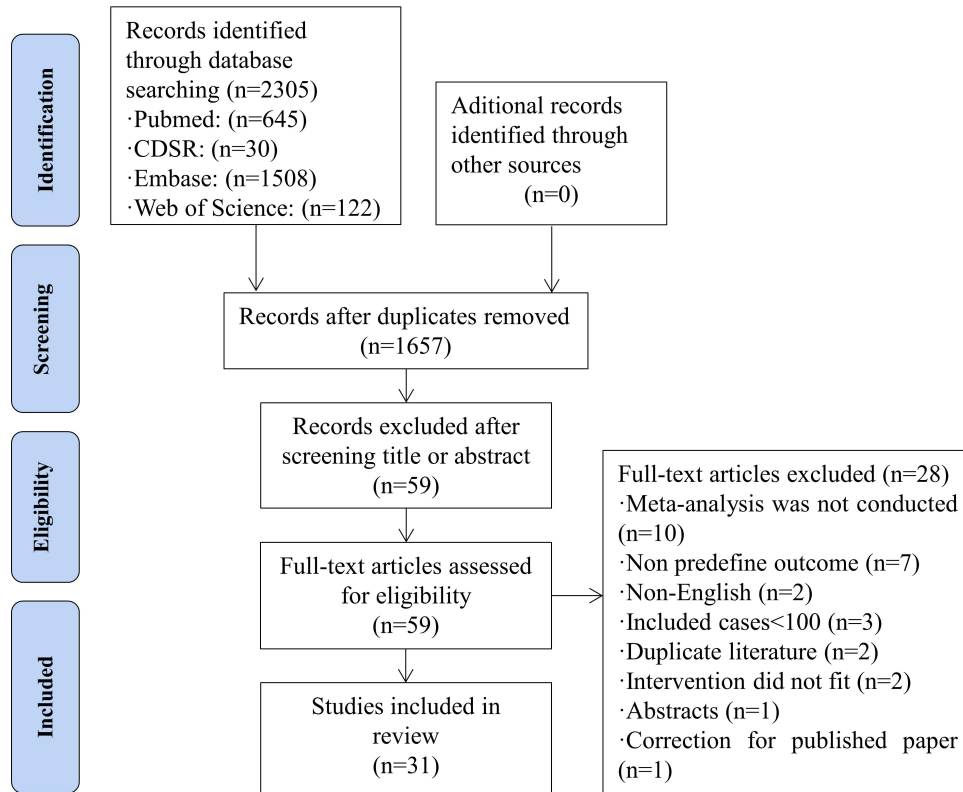

**Figures 1 Flowchart of literature screening.**

CDSR = Cochrane Database of Systemic Review

**Supplementary Table S1 The detailed search strategy**

| Databases | #  | Search strategy                                                                                                                                                                        |
|-----------|----|----------------------------------------------------------------------------------------------------------------------------------------------------------------------------------------|
| Pubmed    | 1  | "renal insufficiency, chronic"[MeSH Terms]                                                                                                                                             |
|           | 2  | "chronic renal insufficiency"[Title/Abstract] or "chronic kidney insufficiency"[Title/Abstract] or "chronic kidney disease"[Title/Abstract] or "chronic renal disease"[Title/Abstract] |
|           | 3  | "CKD"[Title/Abstract] or "CKF"[Title/Abstract] or "CRD"[Title/Abstract] or "CRF"[Title/Abstract]                                                                                       |
|           | 4  | "end-stage kidney"[Title/Abstract] or "end-stage renal"[Title/Abstract] or "endstage kidney"[Title/Abstract] or "endstage renal"[Title/Abstract]                                       |
|           | 5  | "ESRD"[Title/Abstract] or "ESRF"[Title/Abstract] or "ESKD"[Title/Abstract] or "ESKF"[Title/Abstract]                                                                                   |
|           | 6  | "Renal Replacement Therapy"[MeSH Terms]                                                                                                                                                |
|           | 7  | "dialysis"[Title/Abstract]                                                                                                                                                             |
|           | 8  | "hemodialysis"[Title/Abstract] or "haemodialysis"[Title/Abstract] or "hemodiafiltration"[Title/Abstract] or "haemodiafiltration"[Title/Abstract] or "HD"[Title/Abstract]               |
|           | 9  | "PD"[Title/Abstract]                                                                                                                                                                   |
|           | 10 | "renal transplantation"[Title/Abstract] or "kidney grafting"[Title/Abstract] or "kidney transplantation"[Title/Abstract]                                                               |
|           | 11 | "KTRs"[Title/Abstract]                                                                                                                                                                 |
|           | 12 | #1 or #2 or #3 or #4 or #5 or #6 or #7 or #8 or #9 or #10 or #11                                                                                                                       |
|           | 13 | "Exercise"[MeSH Terms]                                                                                                                                                                 |
|           | 14 | "Exercise Movement Techniques"[MeSH Terms]                                                                                                                                             |
|           | 15 | "Exercise Therapy"[MeSH Terms]                                                                                                                                                         |
|           | 16 | "Sports"[MeSH Terms]                                                                                                                                                                   |
|           | 17 | "train"[Title/Abstract] or "physical activity"[Title/Abstract] or "exercise"[Title/Abstract]                                                                                           |
|           | 18 | #13 or #14 or #15 or #16 or #17                                                                                                                                                        |
|           | 19 | "Systematic Review"[Publication Type] or "Systematic Reviews as Topic"[MeSH Terms]                                                                                                     |
|           | 20 | "meta analysis"[Publication Type] or "Meta-Analysis as Topic"[MeSH Terms]                                                                                                              |

|      |    |                                                                                                                                    |
|------|----|------------------------------------------------------------------------------------------------------------------------------------|
|      | 21 | "Systematic Review"[Title/Abstract] or "system review"[Title/Abstract] or "data pooling"[Title/Abstract] or "meta"[Title/Abstract] |
|      | 22 | #19 or #20 or #21                                                                                                                  |
|      | 23 | #12 and #18 and #22                                                                                                                |
| CDSR | 1  | MeSH descriptor: [Kidney Diseases] explode all trees                                                                               |
|      | 2  | ("chronic kidney disease") or ("chronic renal disease") or ("chronic kidney failure") or ("chronic renal failure"):ti,ab,kw        |
|      | 3  | (CKF or CKD or CRF or CRD):ti,ab,kw                                                                                                |
|      | 4  | ("end-stage kidney") or ("end-stage renal") or ("endstage kidney") or ("endstage renal"):ti,ab,kw                                  |
|      | 5  | ESRD or ESRF or ESKD or ESKF:ti,ab,kw                                                                                              |
|      | 6  | MeSH descriptor: [Renal Replacement Therapy] explode all trees                                                                     |
|      | 7  | dialysis:ti,ab,kw                                                                                                                  |
|      | 8  | (hemodialysis or haemodialysis or hemodiafiltration or haemodiafiltration or HD):ti,ab,kw                                          |
|      | 9  | PD:ti,ab,kw                                                                                                                        |
|      | 10 | ("renal transplantation") or ("kidney grafting") or ("kidney transplantation"):ti,ab,kw                                            |
|      | 11 | KTRs:ti,ab,kw                                                                                                                      |
|      | 12 | #1 or #2 or #3 or #4 or #5 or #6 or #7 or #8 or #9 or #10 or #11                                                                   |
|      | 13 | MeSH descriptor: [Exercise] explode all trees                                                                                      |
|      | 14 | MeSH descriptor: [Exercise Movement Techniques] explode all trees                                                                  |
|      | 15 | MeSH descriptor: [Exercise Therapy] explode all trees                                                                              |
|      | 16 | MeSH descriptor: [Sports] explode all trees                                                                                        |
|      | 17 | (train or ("physical activity") or exercise):ti,ab,kw                                                                              |
|      | 18 | #13 or #14 or #15 or #16 or #17                                                                                                    |
|      | 19 | MeSH descriptor: [Meta-Analysis as Topic] explode all trees                                                                        |
|      | 20 | MeSH descriptor: [Systematic Reviews as Topic] explode all trees                                                                   |
|      | 21 | ("systematic review") or ("system review") or ("data pooling") or (meta):ti,ab,kw                                                  |
|      | 22 | #19 or #20 or #21                                                                                                                  |

|                |    |                                                                                                                                              |
|----------------|----|----------------------------------------------------------------------------------------------------------------------------------------------|
|                | 23 | #12 and #18 and #22                                                                                                                          |
| Embase         | 1  | 'kidney disease'/exp                                                                                                                         |
|                | 2  | ('chronic kidney disease' or 'chronic renal disease' or 'chronic kidney failure' or 'chronic renal failure'):ti,ab,kw                        |
|                | 3  | (CKF or CKD or CRF or CRD):ti,ab,kw                                                                                                          |
|                | 4  | ('end-stage kidney' or 'end-stage renal' or 'endstage kidney' or 'endstage renal'):ti,ab,kw                                                  |
|                | 5  | (ESRD or ESRF or ESKD or ESKF):ti,ab,kw                                                                                                      |
|                | 6  | 'renal replacement therapy'/exp                                                                                                              |
|                | 7  | 'dialysis':ti,ab,kw                                                                                                                          |
|                | 8  | (hemodialysis or haemodialysis or hemofiltration or haemofiltration or hemodiafiltration or haemodiafiltration or HD):ti,ab,kw               |
|                | 9  | PD:ti,ab,kw                                                                                                                                  |
|                | 10 | ('renal transplantation' or 'kidney grafting' or 'kidney transplantation'):ti,ab,kw                                                          |
|                | 11 | KTRs:ti,ab,kw                                                                                                                                |
|                | 12 | #1 or #2 or #3 or #4 or #5 or #6 or #7 or #8 or #9 or #10 or #11                                                                             |
|                | 13 | 'exercise'/exp                                                                                                                               |
|                | 14 | 'physical activity'/exp                                                                                                                      |
|                | 15 | 'sport'/exp                                                                                                                                  |
|                | 16 | (train or 'physical activity' or exercise):ti,ab,kw                                                                                          |
|                | 17 | #13 or #14 or #15 or #16                                                                                                                     |
|                | 18 | 'systematic review (topic)'/exp or 'systematic review'/exp                                                                                   |
|                | 19 | 'meta analysis (topic)'/exp or 'meta analysis'/exp                                                                                           |
|                | 20 | ('systematic review' or 'system review' or 'data pooling' or meta):ti,ab,kw                                                                  |
|                | 21 | #18 or #19 or #20                                                                                                                            |
|                | 22 | #12 and #17 and #21                                                                                                                          |
| Web of Science | 1  | TS: ("chronic kidney disease" or "chronic renal disease" or "chronic kidney failure" or "chronic renal failure" or CKD or CRD or CKF or CRF) |



1  
2  
3  
4  
5  
6  
7  
8  
9  
10  
11  
12  
13  
14  
15  
16  
17  
18  
19  
20  
21  
22  
23  
24  
25  
26  
27  
28  
29  
30  
31  
32  
33  
34  
35  
36  
37  
38  
39  
40  
41  
42  
43  
44  
45  
46

|  |   |                                                                                                                                                                            |
|--|---|----------------------------------------------------------------------------------------------------------------------------------------------------------------------------|
|  | 2 | TS: ("end-stage kidney" or "end-stage renal" or "endstage kidney" or "endstage renal" or ESKD or ESKF or ESRD or ESRF)                                                     |
|  | 3 | TS: ("renal replacement therapy" or dialysis or hemodialysis or haemodialysis or hemofiltration or haemofiltration or hemodiafiltration or haemodiafiltration or HD or PD) |
|  | 4 | TS: ("renal transplantation" or "kidney grafting" or "kidney transplantation" or KTRs)                                                                                     |
|  | 5 | #1 or #2 or #3 or #4                                                                                                                                                       |
|  | 6 | TS: (train or exercise or "physical activity")                                                                                                                             |
|  | 7 | TS: ("systematic review" or "system review" or "data pooling" or meta)                                                                                                     |
|  | 8 | #1 and #2 and #3 and #4 and #5                                                                                                                                             |

**Supplementary Table S2** The characteristic of excluded studies

| Studies                 | Reasons for exclusion           |
|-------------------------|---------------------------------|
| Nantakool et al (2020)  | Non predefine outcome           |
| Sawant et al (2014)     | Non predefine outcome           |
| Smart et al (2014)      | Duplicate literature            |
| Barcellos et al (2015)  | Meta-analysis was not conducted |
| Yang et al (2020)       | Non predefine outcome           |
| Young et al (2018)      | Included cases<100              |
| Phan et al (2015)       | Duplicate literature            |
| Molsted et al (2019)    | Included cases<100              |
| Segura et al (2010)     | Non-English                     |
| Ferreira et al (2020)   | Non predefine outcome           |
| Koufaki et al (2013)    | Meta-analysis was not conducted |
| Smart et al (2012)      | Abstracts                       |
| Howden et al (2012)     | Meta-analysis was not conducted |
| Calella et al (2019)    | Meta-analysis was not conducted |
| Singh et al (2005)      | Meta-analysis was not conducted |
| Cardoso et al (2020)    | Non predefine outcome           |
| Villanego et al (2020)  | Non-English                     |
| Medeiros et al (2017)   | Intervention did not fit        |
| Macdonald et al (2009)  | Meta-analysis was not conducted |
| Wen et al (2019)        | Non predefine outcome           |
| Yang et al (2015)       | Non predefine outcome           |
| Thangarasa et al (2018) | Included cases<100              |
| Chan et al (2016)       | Meta-analysis was not conducted |

1  
2  
3  
4  
5  
6  
7  
8  
9  
10  
11  
12  
13  
14  
15  
16  
17  
18  
19  
20  
21  
22  
23  
24  
25  
26  
27  
28  
29  
30  
31  
32  
33  
34  
35  
36  
37  
38  
39  
40  
41  
42  
43  
44  
45  
46

|                        |                                 |
|------------------------|---------------------------------|
| Johansen et al (2010)  | Intervention did not fit        |
| Thompson et al (2020)  | Correction for published paper  |
| Bakaloudi et al (2020) | Meta-analysis was not conducted |
| Kirkman et al (2019)   | Meta-analysis was not conducted |
| Afsar et al (2018)     | Meta-analysis was not conducted |

For peer review only

Supplementary Table S3 The basic characteristics of the included meta-analyses

| Author (year)   | Design                | Stage of CKD         | k (n)*  | Exercise type | Mode          | Outcomes                  | SMD or MD(95% CI)      | Effect size | P      | I <sup>2</sup> | GRADE    |
|-----------------|-----------------------|----------------------|---------|---------------|---------------|---------------------------|------------------------|-------------|--------|----------------|----------|
| Pei (2019)      | RCT/quasi-RCT         | Mixed                | 17(464) | AE            | -             | VO <sub>2peak</sub>       | MD:2.08 (1.1,3.05)     | -           | <0.001 | 25.0%          | Low      |
|                 |                       |                      | 5 (445) |               |               | STS 60                    | MD:2.08 (1.1,3.05)     | -           | 0.98   | 82.0%          | Very low |
|                 |                       |                      | 8 (496) |               |               | 6MWT                      | MD:0.04 (-0.52, 0.59)  | -           | 0.9    | 86.0%          | Very low |
|                 |                       |                      | 12(514) |               |               | SBP                       | MD:-2.91 (-6.68, 0.87) | -           | 0.13   | 40.0%          | Low      |
|                 |                       |                      | 12(514) |               |               | DBP                       | MD:-1.11 (-3.41, 1.20) | -           | 0.35   | 0.0%           | Low      |
|                 |                       |                      | 6(522)  |               |               | Physical function (SF-36) | MD:8.36(-1.24,17.95)   | -           | 0.09   | 76.0%          | Very low |
|                 |                       |                      | 7(562)  |               |               | Physical role (SF-36)     | MD:14.65(1.47,27.84)   | -           | 0.03   | 78.0%          | Very low |
|                 |                       |                      | 6(447)  |               |               | Social function (SF-36)   | MD:8.24(-1.09,17.58)   | -           | 0.08   | 85.0%          | Very low |
|                 |                       |                      | 6(513)  |               |               | Pain (SF-36)              | MD:5.94(1.65,10.23)    | -           | 0.007  | 49.0%          | Very low |
|                 |                       |                      | 7(562)  |               |               | General health (SF-36)    | MD:8.90(2.48,15.32)    | -           | 0.007  | 71.0%          | Very low |
| 6(542)          | Mental health (SF-36) | MD:7.30(-0.94,15.54) | -       | 0.08          | 84.0%         | Very low                  |                        |             |        |                |          |
| Ferreira (2019) | RCT/quasi-RCT         | HD                   | 10(346) | AE            | Intradialytic | Kt/V                      | SMD:2.21(1.17,3.25)    | Large       | <0.001 | 92.0%          | Very low |
| Cheema (2014)   | RCT                   | Predialysis          | 7(249)  | RT            | -             | Muscle Strength           | SMD:1.15 (0.80-1.49)   | Large       | 0.161  | 35.0%          | Low      |
|                 |                       |                      | 6(223)  |               |               | HRQoL                     | SMD:0.83(0.51-1.16)    | Large       | 0.226  | 27.8%          | Low      |
| Wu (2020)       | RCT/quasi-RCT         | Predialysis          | 3(204)  | AE+RT         | -             | SBP                       | SMD:-0.19(-0.46,0.08)  | Small       | 0.16   | 50.0%          | Very low |
|                 |                       |                      | 4(194)  |               |               | DBP                       | SMD:-0.47(-1.10,0.15)  | Small       | 0.14   | 70.0%          | Very low |

|                 |                |             |         |       |               |                     |                        |          |        |       |          |
|-----------------|----------------|-------------|---------|-------|---------------|---------------------|------------------------|----------|--------|-------|----------|
| Nakamura (2020) | RCT/cross-over | Predialysis | 10(401) | Mixed | -             | VO <sub>2peak</sub> | SMD:0.88(0.53,1.23)    | Large    | <0.001 | 56.0% | Low      |
|                 |                |             | 4(119)  |       |               | Muscle Strength     | SMD:0.35(-0.03,0.73)   | Small    | 0.07   | 7.0%  | Very low |
|                 |                |             | 5(392)  |       |               | 6MWT                | SMD:1.04(0.17,1.90)    | Large    | 0.02   | 92.0% | Very low |
|                 |                |             | 3(170)  |       |               | TUGT                | SMD:-0.42(-0.73,-0.11) | Small    | 0.007  | 0.0%  | Very low |
| Lu (2019)       | RCT            | Dialysis    | 11(300) | Mixed | Mixed         | 6MWT                | MD:67.6(49.93,85.26)   | -        | <0.001 | 30.6% | Moderate |
|                 |                |             | 3(193)  |       |               | STS 10              | MD:-4.69(-9.01,-0.38)  | -        | 0.028  | 72.2% | Very low |
|                 |                |             | 5(234)  |       |               | HGS                 | MD:5.35(3.34,7.37)     | -        | <0.001 | 0.3%  | Low      |
|                 |                |             | 7(224)  |       |               | Muscle strength     | MD:3.67(1.37,5.97)     | -        | 0.020  | 38.6% | Low      |
|                 |                |             | 6(240)  |       |               | STS 30              | MD:2.43(0.91,3.96)     | -        | 0.002  | 21.2% | Low      |
| Chen (2019)     | RCT            | KTRs        | 5(198)  | Mixed | -             | SBP                 | SMD:0.18(-0.10,0.46)   | Small    | 0.21   | 0.0%  | Very low |
|                 |                |             | 5(198)  |       |               | DBP                 | SMD:0.04(-0.45,0.52)   | Small    | 0.89   | 59.0% | Very low |
|                 |                |             | 4(166)  |       |               | BMI                 | SMD:0.02(-0.28,0.33)   | Small    | 0.89   | 0.0%  | Very low |
|                 |                |             | 6(202)  |       |               | VO <sub>2peak</sub> | SMD:0.33(-0.02,0.69)   | Small    | 0.06   | 27.0% | Very low |
| Song (2018)     | RCT            | HD          | 4(141)  | Mixed | Mixed         | RLS                 | SMD:-1.79(-2.21,-1.37) | Large    | <0.001 | 87.0% | Very low |
|                 |                |             | 3(139)  |       |               | Fatigue             | SMD:-0.85(-1.20,-0.50) | Large    | <0.001 | 0.0%  | Very low |
| Salhab (2019)   | RCT            | HD          | 5(282)  | AE    | Intradialytic | PCS                 | SMD:1.82(-0.92,4.55)   | Large    | 0.19   | 98.0% | Very low |
|                 |                |             | 5(282)  |       |               | MCS                 | SMD:1.02(0.31,1.73)    | Large    | 0.005  | 75.0% | Very low |
| Andrade (2019)  | RCT            | HD          | 5(201)  | AE+RT | Intradialytic | VO <sub>2peak</sub> | SMD:1.01(0.71,1.30)    | Large    | <0.001 | 0.0%  | Low      |
| Chung (2016)    | RCT            | HD          | 4(127)  | Mixed | Intradialytic | 6MWT                | SMD:0.44(0.09,0.80)    | Small    | 0.015  | 0.0%  | Low      |
|                 |                |             | 6(238)  |       |               | VO <sub>2peak</sub> | SMD:0.55(0.18,0.92)    | Moderate | 0.003  | 52.9% | Very low |
|                 |                |             | 6(229)  |       |               | PCS                 | SMD:0.46(0.20,0.73)    | Small    | <0.001 | 1.90% | Low      |
|                 |                |             | 5(193)  |       |               | MCS                 | SMD:0.23(-0.05,0.52)   | Small    | 0.109  | 0.0%  | Low      |
| Zhang (2021)    | RCT            | HD          | 8(299)  | RT    | Intradialytic | 6MWT                | SMD:0.52(0.28,0.75)    | Moderate | <0.001 | 18.7% | Very low |
|                 |                |             | 5(164)  |       |               | STS 30              | SMD:0.42(0.11,0.74)    | Small    | 0.008  | 0.0%  | Very low |

|                    |     |             |         |       |               |                     |                        |          |        |       |          |
|--------------------|-----|-------------|---------|-------|---------------|---------------------|------------------------|----------|--------|-------|----------|
|                    |     |             | 6(300)  |       |               | HGS                 | SMD:0.35(0.12,0.58)    | Small    | 0.003  | 41.6% | Very low |
|                    |     |             | 7(297)  |       |               | PCS                 | SMD:0.23(-0.00,0.46)   | Small    | 0.055  | 0.0%  | Very low |
|                    |     |             | 7(297)  |       |               | MCS                 | SMD:0.13(-0.10,0.36)   | Small    | 0.082  | 46.5% | Very low |
| Pu<br>(2019)       | RCT | HD          | 10(301) | Mixed | Intradialytic | Kt/V                | SMD:0.29(0.06,0.52)    | Small    | 0.01   | 0.0%  | Very low |
|                    |     |             | 10(400) |       |               | VO <sub>2peak</sub> | SMD:0.57(0.23,0.90)    | Moderate | <0.001 | 59.0% | Low      |
|                    |     |             | 7(219)  |       |               | 6MWT                | SMD:0.57(0.30,0.84)    | Moderate | <0.001 | 0.0%  | Low      |
|                    |     |             | 10(320) |       |               | PCS                 | SMD:0.57(0.14,1.01)    | Moderate | 0.01   | 70.0% | Very low |
|                    |     |             | 8(219)  |       |               | MCS                 | SMD:0.19(-0.09,0.46)   | Small    | 0.18   | 30.0% | Low      |
|                    |     |             | 7(287)  |       |               | SBP                 | SMD:-0.28(-0.52,-0.05) | Small    | 0.02   | 0.0%  | Very low |
|                    |     |             | 7(287)  |       |               | DBP                 | SMD:-0.32(-0.55,-0.08) | Small    | 0.008  | 42.0% | Very low |
| Yamamoto<br>(2021) | RCT | Predialysis | 10(392) | AE    | -             | SBP                 | SMD:-0.75(-1.24,-0.26) | Moderate | 0.003  | 80.3% | Very low |
|                    |     |             | 10(365) |       |               | VO <sub>2peak</sub> | SMD:0.54(0.29,0.78)    | Moderate | <0.001 | 24.6% | Very low |
|                    |     |             | 10(414) |       |               | BMI                 | SMD:-0.19(-0.38,-0.00) | Small    | 0.026  | 0.0%  | Low      |
| Thompson<br>(2019) | RCT | Predialysis | 10(335) | Mixed | -             | SBP                 | MD:-4.3(-9.0,0.4)      | -        | N.P.   | 50.4% | Very low |
|                    |     |             | 8(303)  |       |               | DBP                 | MD:-1.18(-4.76,2.40)   | -        | N.P.   | 60.5% | Very low |
| Yang<br>(2017)     | RCT | Mixed       | 4(150)  | Mixed | -             | VO <sub>2peak</sub> | SMD:0.33(0.03,0.63)    | Small    | 0.003  | 47.0% | Low      |
| Clarkson<br>(2019) | RCT | Dialysis    | 18(744) | Mixed | -             | 6MWT                | MD:33.64(23.74,43.54)  | -        | <0.001 | 0.0%  | Moderate |
| Zhao<br>(2019)     | RCT | Dialysis    | 3(141)  | Mixed | -             | Fatigue             | SMD:-0.97(-1.32,-0.62) | Large    | <0.001 | 47.0% | Low      |
|                    |     |             | 5(186)  |       |               | PCS                 | SMD:0.31(0.02,0.61)    | Small    | 0.04   | 46.0% | Low      |
|                    |     |             | 5(186)  |       |               | MCS                 | SMD:0.30(-0.20,0.80)   | Small    | 0.24   | 64.0% | Very low |
| Zhang<br>(2019)    | RCT | Predialysis | 14(463) | Mixed | -             | SBP                 | SMD:-0.41(-0.70,-0.11) | Small    | 0.007  | 55.0% | Moderate |
|                    |     |             | 12(399) |       |               | DBP                 | SMD:-0.31(-0.71,0.08)  | Small    | 0.12   | 70.0% | Low      |
|                    |     |             | 13(466) |       |               | BMI                 | SMD:-0.21(-0.39,-0.03) | Small    | 0.02   | 0.0%  | Moderate |

|                  |               |       |         |       |   |                     |                        |          |        |       |          |
|------------------|---------------|-------|---------|-------|---|---------------------|------------------------|----------|--------|-------|----------|
| Huang (2019)     | RCT           | HD    | 8(257)  | Mixed | - | Kt/V                | SMD:0.19(-0.06,0.43)   | Small    | 0.14   | 0.0%  | Very low |
|                  |               |       | 7(260)  |       |   | SBP                 | SMD:-0.17(-0.41,0.08)  | Small    | 0.18   | 8.0%  | Low      |
|                  |               |       | 7(260)  |       |   | DBP                 | SMD:-0.23(-0.69,0.24)  | Small    | 0.34   | 68.0% | Very low |
|                  |               |       | 7(205)  |       |   | 6MWT                | SMD:1.01(0.26,1.76)    | Large    | 0.008  | 83.0% | Very low |
|                  |               |       | 7(263)  |       |   | PCS                 | SMD:0.34(0.09,0.59)    | Small    | 0.007  | 27.0% | Low      |
|                  |               |       | 7(263)  |       |   | MCS                 | SMD:0.27(0.02,0.51)    | Small    | 0.03   | 0.0%  | Low      |
|                  |               |       | 10(371) |       |   | VO <sub>2peak</sub> | SMD:0.73(0.52,0.95)    | Moderate | <0.001 | 71.0% | Low      |
| Heiwe (2011)     | RCT/quasi-RCT | Mixed | 24(847) | Mixed | - | Aerobic capacity    | SMD:-0.56(-0.70,-0.42) | Moderate | <0.001 | 12.0% | Moderate |
|                  |               |       | 9(358)  |       |   | Muscle strength     | SMD:-0.52(-0.73,-0.31) | Moderate | <0.001 | 0.0%  | Low      |
|                  |               |       | 7(191)  |       |   | Walking capacity    | SMD:-0.48(-0.79,-0.17) | Small    | 0.003  | 2.0%  | Low      |
|                  |               |       | 9(347)  |       |   | SBP                 | SMD:0.25(0.04,0.47)    | Small    | 0.02   | 0.0%  | Low      |
|                  |               |       | 11(419) |       |   | DBP                 | SMD:0.16(-0.04,0.36)   | Small    | 0.11   | 40.0% | High     |
| Heiwe (2014)     | RCT           | HD    | 21(374) | Mixed | - | Aerobic capacity    | SMD:-0.80(-1.02,-0.58) | Large    | <0.001 | 0.0%  | Low      |
|                  |               |       | 10(212) |       |   | DBP                 | SMD:0.17(-0.16,0.49)   | Small    | 0.3    | 45.0% | Low      |
|                  |               |       | 10(312) |       |   | SBP                 | SMD:0.04(-0.4,0.41)    | Small    | 0.8    | 58.0% | Very low |
|                  |               |       | 10(385) |       |   | Muscle strength     | SMD:-0.56(-0.77,-0.35) | Moderate | <0.001 | 0.0%  | Very low |
|                  |               |       | 7(174)  |       |   | Walking capacity    | SMD:-0.33(-0.67,0.01)  | Small    | 0.06   | 16.0% | Low      |
| Matsuzawa (2017) | RCT           | HD    | 18(582) | Mixed | - | VO <sub>2peak</sub> | SMD:0.62(0.38,0.87)    | Moderate | <0.001 | 49.0% | High     |
|                  |               |       | 10(326) |       |   | 6MWT                | SMD:0.58(0.24,0.93)    | Moderate | <0.001 | 53.0% | Low      |
|                  |               |       | 9(281)  |       |   | Muscle strength     | SMD:0.94(0.67,1.21)    | Large    | <0.001 | 10.0% | Very low |
|                  |               |       | 9(264)  |       |   | PCS                 | SMD:0.53(0.52,0.82)    | Moderate | <0.001 | 19.0% | Very low |
|                  |               |       | 8(228)  |       |   | MCS                 | SMD:0.14(-0.15,0.42)   | Small    | 0.34   | 10.0% | Very low |
| Smart (2011)     | RCT           | HD    | 8(365)  | Mixed | - | VO <sub>2peak</sub> | SMD:0.75(0.39,1.11)    | Moderate | <0.001 | 60.0% | Low      |
| Bogataj          | RCT           | HD    | 19(571) | Mixed | - | 6MWT                | SMD:0.44(0.21,0.67)    | Small    | <0.001 | 49.6% | Very low |

|                 |     |             |         |       |               |                     |                        |          |        |       |          |
|-----------------|-----|-------------|---------|-------|---------------|---------------------|------------------------|----------|--------|-------|----------|
| (2020)          |     |             | 20(504) |       |               | VO <sub>2peak</sub> | SMD:0.58(0.32,0.85)    | Moderate | <0.001 | 57.4% | Very low |
|                 |     |             | 5(461)  |       |               | STS 10              | SMD:-0.55(-1.00,-0.09) | Moderate | 0.019  | 71.6% | Very low |
| Sheng (2014)    | RCT | HD          | 7(233)  | Mixed | Intradialytic | Kt/V                | SMD:0.27(0.01,0.53)    | Small    | 0.040  | 0.0%  | Very low |
|                 |     |             | 7(310)  |       |               | VO <sub>2peak</sub> | SMD:0.53(0.30,0.76)    | Moderate | <0.001 | 36.0% | Very low |
|                 |     |             | 7(256)  |       |               | PCS                 | SMD:0.30(0.05,0.55)    | Small    | 0.02   | 39.5% | Very low |
|                 |     |             | 5(167)  |       |               | MCS                 | SMD:0.14(-0.16,0.43)   | Small    | 0.37   | 14.8% | Very low |
|                 |     |             | 4(146)  |       |               | 6MWT                | SMD:0.58(0.23,0.93)    | Moderate | <0.001 | 89.7% | Very low |
|                 |     |             | 7(296)  |       |               | DBP                 | SMD:-0.24(-0.47,-0.01) | Small    | 0.04   | 52.1% | Very low |
|                 |     |             | 7(296)  |       |               | SBP                 | SMD:-0.27(-0.50,-0.04) | Small    | 0.02   | 0.0%  | Very low |
|                 |     |             | 3(106)  |       |               | STS 60              | SMD:0.71(0.31,1.12)    | Moderate | <0.001 | 0.0%  | Very low |
| Neto (2018)     | RCT | HD          | 10(394) | Mixed | Intradialytic | VO <sub>2peak</sub> | SMD:0.60(0.15,1.04)    | Moderate | 0.008  | 76.0% | Very low |
|                 |     |             | 7(187)  |       |               | PCS                 | SMD:0.50(-0.19,1.18)   | Moderate | 0.16   | 62.0% | Very low |
|                 |     |             | 7(185)  |       |               | MCS                 | SMD:0.39(-0.19,0.98)   | Small    | 0.19   | 50.0% | Very low |
|                 |     |             | 6(158)  |       |               | 6MWT                | SMD:0.96(0.11,1.80)    | Large    | 0.03   | 82.0% | Very low |
|                 |     |             | 9(250)  |       |               | Muscle strength     | SMD:0.61(0.39,0.83)    | Moderate | <0.001 | 58.9% | Very low |
| Ferrari (2019)  | RCT | HD          | 12(370) | AE    | Intradialytic | Kt/V                | MD:0.08(0,0.15)        | -        | 0.04   | 56.0% | Low      |
|                 |     |             | 6(220)  | RT    |               | Kt/V                | MD:0.1(0,0.2)          | -        | 0.06   | 6.0%  | Very low |
|                 |     |             | 5(201)  | COM   |               | VO <sub>2peak</sub> | MD:5.41(4.03,6.79)     | -        | <0.001 | 0.0%  | Low      |
|                 |     |             | 7(248)  | AE    |               | VO <sub>2peak</sub> | MD:2.07(0.42,3.72)     | -        | <0.001 | 0.0%  | Very low |
|                 |     |             | 6(211)  | RT    |               | 6MWT                | MD:68.5(29.05,107.96)  | -        | <0.001 | 36.0% | Low      |
|                 |     |             | 6(188)  | AE    |               | 6MWT                | MD:64.98(43.86,86.11)  | -        | <0.001 | 0.0%  | Low      |
|                 |     |             | 10(332) | AE    |               | SBP                 | MD:-10.07(16.35,-3.78) | -        | 0.002  | 44.0% | Low      |
|                 |     |             | 10(334) | AE    |               | DBP                 | MD:-2.96(-7.71,1.78)   | -        | 0.22   | 0.0%  | Low      |
| Wyngaert (2018) | RCT | Predialysis | 8(269)  | AE    | -             | SBP                 | SMD:0.08(-0.58,0.74)   | Small    | 0.81   | 84%   | Very low |
|                 |     |             | 7(237)  | AE    |               | DBP                 | SMD:-0.09(-0.78,0.59)  | Small    | 0.79   | 83%   | Very low |



|              |     |      |         |       |   |                                   |                        |          |        |       |          |
|--------------|-----|------|---------|-------|---|-----------------------------------|------------------------|----------|--------|-------|----------|
|              |     |      | 11(325) |       |   | VO <sub>2peak</sub>               | SMD:0.99(0.49,1.48)    | Large    | <0.001 | 74.0% | Very low |
|              |     |      | 9(294)  |       |   | BMI                               | SMD:-0.36(-0.60,-0.13) | Small    | 0.002  | 48.0% | Low      |
| Oguch (2018) | RCT | KTRs | 4(182)  | Mixed | - | VO <sub>2peak</sub>               | SMD:0.38(-0.06,0.82)   | Small    | 0.09   | 45.0% | Low      |
|              |     |      | 4(179)  |       |   | HRQoL                             | SMD:0.54(0.02,1.07)    | Moderate | 0.04   | 58.0% | Very low |
| Ju (2020)    | RCT |      | 3 (115) | Mixed | - | HGS                               | SMD:0.52(0.14,0.89)    | Moderate | 0.007  | 0.0%  | Very low |
|              |     |      | 3 (387) |       |   | Symptom/problem (KDQoL)           | SMD:1.92(-1.06,4.90)   | Large    | 0.21   | 99.0% | Very low |
|              |     |      | 3 (387) |       |   | Effects of kidney disease (KDQoL) | SMD:-3.69(-8.56,1.19)  | Large    | 0.14   | 99.0% | Very low |
|              |     |      | 3 (387) |       |   | Burden of kidney disease (KDQoL)  | SMD:1.04 (-0.75,2.82)  | Large    | 0.26   | 98.0% | Very low |

Abbreviation: RCT = randomized controlled trial; AE = aerobic exercise; RT = resistance training; COM = combine; VO<sub>2peak</sub> = peak oxygen uptake; HRQoL = health-related quality of life; DBP = diastolic blood pressure; SBP = systolic blood pressure; PCS = physical component summary; MCS = mental component summary; 6MWT = 6 minutes walk test; STS 10 = sit to stand 10 test; STS 30 = sit to stand 30 test; STS 60 = sit to stand 60 test; TUGT = timed up and go test; RLS = Restless Legs Syndrome; BMI = body mass index; SMD = standardized mean difference; MD = mean difference; HD = hemodialysis; KTRs = kidney transplant recipients; SF-36 = short form-36; KDQoL = kidney disease quality of life; GRADE = Grading of Recommendations Assessment, Development, and Evaluation.

\*Number of included studies and corresponding sample size.  
Mixed means aerobic exercise combined with resistance training.

**Supplementary Table S4** Results of the assessment of the methodological quality of the included meta-analyses using AMSTAR-2

| Author         | AMSTAR-2 Items |   |   |   |   |   |   |   |   |    |    |    |    |    |    |    | Score  |
|----------------|----------------|---|---|---|---|---|---|---|---|----|----|----|----|----|----|----|--------|
|                | 1              | 2 | 3 | 4 | 5 | 6 | 7 | 8 | 9 | 10 | 11 | 12 | 13 | 14 | 15 | 16 |        |
| Pei(2019)      | √              | × | √ | ○ | √ | √ | × | √ | √ | ×  | √  | ×  | ×  | ×  | √  | ×  | 53.1%  |
| Ferreira(2019) | √              | √ | √ | ○ | √ | √ | × | ○ | √ | ×  | √  | ×  | ×  | ×  | ×  | ×  | 50.0%  |
| Cheema(2014)   | √              | × | √ | √ | √ | √ | √ | √ | √ | ×  | √  | √  | √  | √  | √  | √  | 87.5%  |
| Wu(2020)       | √              | √ | √ | ○ | √ | √ | × | √ | √ | ×  | √  | √  | √  | √  | √  | √  | 84.4%  |
| Nakamura(2020) | √              | √ | √ | ○ | √ | √ | × | √ | √ | ×  | √  | √  | √  | √  | √  | √  | 84.4%  |
| Lu(2019)       | √              | × | √ | ○ | √ | × | × | ○ | ○ | ×  | √  | ×  | ×  | ×  | √  | √  | 46.9%  |
| Chen(2019)     | √              | × | √ | ○ | × | √ | × | √ | ○ | ×  | √  | ×  | ×  | ×  | ×  | √  | 43.8%  |
| Song(2018)     | √              | × | √ | ○ | √ | √ | × | √ | √ | ×  | √  | ×  | √  | √  | √  | √  | 71.9%  |
| Salhab(2021)   | √              | √ | √ | ○ | √ | √ | × | √ | × | ×  | √  | ×  | ×  | √  | ×  | ×  | 53.1%  |
| Andrade(2019)  | √              | √ | √ | ○ | √ | √ | × | √ | √ | ×  | √  | ×  | ×  | √  | ×  | √  | 65.6%  |
| Chung(2016)    | √              | × | √ | ○ | √ | √ | √ | √ | √ | ×  | √  | √  | √  | √  | √  | ×  | 78.1%  |
| Zhang(2019)    | √              | × | √ | ○ | √ | √ | × | √ | √ | ×  | √  | ×  | √  | √  | √  | ×  | 65.6%  |
| Pu(2019)       | √              | × | √ | ○ | √ | √ | × | √ | √ | ×  | √  | √  | √  | √  | ×  | √  | 71.9%  |
| Yamamoto(2021) | √              | × | √ | × | √ | √ | × | ○ | √ | ×  | √  | √  | √  | √  | √  | √  | 71.9%  |
| Thompson(2019) | √              | × | √ | ○ | √ | √ | × | √ | √ | √  | √  | √  | √  | √  | √  | √  | 84.4%  |
| Yang(2017)     | √              | × | √ | ○ | √ | √ | × | ○ | √ | ×  | √  | √  | √  | √  | √  | √  | 75.0%  |
| Clarkson(2019) | √              | × | √ | ○ | √ | √ | × | √ | √ | ×  | √  | √  | √  | √  | √  | √  | 78.1%  |
| Zhao(2019)     | √              | × | √ | ○ | √ | √ | × | √ | √ | ×  | √  | ×  | √  | ×  | ×  | √  | 59.4%  |
| Zhang(2019)    | √              | × | √ | ○ | √ | √ | × | ○ | √ | ×  | √  | √  | ×  | ×  | √  | √  | 62.5%  |
| Huang(2019)    | √              | √ | √ | ○ | √ | √ | × | √ | √ | ×  | √  | √  | ×  | ×  | √  | √  | 71.9%  |
| Heiwe(2011)    | √              | √ | √ | √ | √ | √ | √ | √ | √ | √  | √  | √  | √  | √  | √  | √  | 100.0% |
| Heiwe(2014)    | √              | √ | √ | ○ | √ | √ | √ | √ | √ | ×  | √  | ×  | √  | √  | ×  | √  | 78.1%  |

1  
2  
3  
4  
5  
6  
7  
8  
9  
10  
11  
12  
13  
14  
15  
16  
17  
18  
19  
20  
21  
22  
23  
24  
25  
26  
27  
28  
29  
30  
31  
32  
33  
34  
35  
36  
37  
38  
39  
40  
41  
42  
43  
44  
45  
46

|                 |   |   |   |   |   |   |   |   |   |   |   |   |   |   |   |   |       |
|-----------------|---|---|---|---|---|---|---|---|---|---|---|---|---|---|---|---|-------|
| Matsuzawa(2017) | √ | √ | √ | ○ | √ | √ | × | √ | √ | × | √ | × | × | √ | √ | √ | 71.9% |
| Smart(2011)     | √ | × | √ | ○ | √ | × | × | ○ | ○ | × | √ | × | × | √ | × | × | 40.6% |
| Bogataj(2020)   | √ | × | √ | ○ | √ | × | × | √ | √ | × | √ | √ | × | √ | × | √ | 59.4% |
| Sheng(2014)     | √ | × | √ | ○ | √ | √ | √ | √ | √ | × | √ | × | × | √ | √ | × | 65.6% |
| Neto(2018)      | √ | × | √ | ○ | √ | √ | × | √ | √ | × | √ | × | × | × | × | √ | 53.1% |
| Ferrari(2019)   | √ | √ | √ | ○ | √ | √ | √ | √ | √ | × | √ | √ | √ | √ | √ | √ | 90.6% |
| Wyngaert(2018)  | √ | √ | √ | ○ | √ | √ | × | √ | √ | × | √ | √ | √ | √ | √ | √ | 84.4% |
| Oguchi(2018)    | √ | √ | √ | ○ | √ | √ | × | √ | √ | × | √ | √ | √ | × | √ | × | 71.9% |
| Ju(2020)        | √ | × | √ | ○ | × | × | × | √ | √ | × | √ | × | × | × | × | × | 34.4% |

√ mean yes; ○ mean partial yes; ×mean no.

1. Did the research questions and inclusion criteria for the review include the components of PICO? 2. Did the report of the review contain an explicit statement that the review methods were established prior to the conduct of the review and did the report justify any significant deviations from the protocol? 3. Did the review authors explain their selection of the study designs for inclusion in the review? 4. Did the review authors use a comprehensive literature search strategy? 5. Did the review authors perform study selection in duplicate? 6. Did the review authors perform data extraction in duplicate? 7. Did the review authors provide a list of excluded studies and justify the exclusions? 8. Did the review authors describe the included studies in adequate detail? 9. Did the review authors use a satisfactory technique for assessing the risk of bias (RoB) in individual studies that were included in the review? 10. Did the review authors report on the sources of funding for the studies included in the review? 11. If meta-analysis was performed did the review authors use appropriate methods for statistical combination of results? 12. If meta-analysis was performed, did the review authors assess the potential impact of RoB in individual studies on the results of the meta-analysis or other evidence synthesis? 13. Did the review authors account for RoB in individual studies when interpreting/ discussing the results of the review? 14. Did the review authors provide a satisfactory explanation for, and discussion of, any heterogeneity observed in the results of the review? 15. If they performed quantitative synthesis did the review authors carry out an adequate investigation of publication bias (small study bias) and discuss its likely impact on the results of the review? 16. Did the review authors report any potential sources of conflict of interest, including any funding they received for conducting the review?

**Supplementary Table S5:** Results of the assessment of the quality of evidence for each outcome of the included meta-analyses using GRADE

| Author                | Outcome                   | GRADE items       |                   |              |              |                   | Quality of the evidence |
|-----------------------|---------------------------|-------------------|-------------------|--------------|--------------|-------------------|-------------------------|
|                       |                           | Risk of bias      | Inconsistency     | Indirectness | Imprecision  | Publication bias  |                         |
| Pei (2019)            | VO <sub>2peak</sub>       | Very serious (-2) | Neutral           | Neutral      | Neutral      | Neutral           | Moderate                |
|                       | STS 60                    | Serious (-1)      | Very serious (-2) | Neutral      | Neutral      | Serious (-1)      | Very low                |
|                       | 6MWT                      | Serious (-1)      | Very serious (-2) | Neutral      | Neutral      | Serious (-1)      | Very low                |
|                       | SBP                       | Serious (-1)      | Neutral           | Neutral      | Neutral      | Not reported (-1) | Moderate                |
|                       | DBP                       | Serious (-1)      | Neutral           | Neutral      | Neutral      | Not reported (-1) | Moderate                |
|                       | Physical function (SF-36) | Serious (-1)      | Very serious (-2) | Neutral      | Serious (-1) | Serious (-1)      | Very low                |
|                       | Physical role (SF-36)     | Serious (-1)      | Very serious (-2) | Neutral      | Serious (-1) | Serious (-1)      | Very low                |
|                       | Social function (SF-36)   | Serious (-1)      | Very serious (-2) | Neutral      | Serious (-1) | Serious (-1)      | Very low                |
|                       | Pain (SF-36)              | Serious (-1)      | Serious (-1)      | Neutral      | Serious (-1) | Serious (-1)      | Very low                |
|                       | General health (SF-36)    | Serious (-1)      | Very serious (-2) | Neutral      | Serious (-1) | Serious (-1)      | Very low                |
| Mental health (SF-36) | Serious (-1)              | Very serious (-2) | Neutral           | Serious (-1) | Serious (-1) | Very low          |                         |
| Ferreira (2019)       | Kt/V                      | Very serious (-2) | Very serious (-2) | Neutral      | Serious (-1) | Not reported (-1) | Very low                |
| Cheema (2014)         | Muscle Strength           | Neutral           | Neutral           | Neutral      | Serious (-1) | Serious (-1)      | Moderate                |
|                       | HRQoL                     | Neutral           | Neutral           | Neutral      | Serious (-1) | Serious (-1)      | Moderate                |
| Wu (2020)             | SBP                       | Very serious (-2) | Serious (-1)      | Neutral      | Serious (-1) | Serious (-1)      | Very low                |
|                       | DBP                       | Very serious (-2) | Serious (-1)      | Neutral      | Serious (-1) | Serious (-1)      | Very low                |

|                    |                     |                   |                   |         |                   |              |          |
|--------------------|---------------------|-------------------|-------------------|---------|-------------------|--------------|----------|
| Nakamura<br>(2020) | VO <sub>2peak</sub> | Neutral           | Serious (-1)      | Neutral | Neutral           | Serious (-1) | Moderate |
|                    | Muscle Strength     | Very serious (-2) | Neutral           | Neutral | Serious (-1)      | Serious (-1) | Very low |
|                    | 6MWT                | Neutral           | Very serious (-2) | Neutral | Serious (-1)      | Serious (-1) | Very low |
|                    | TUGT                | Serious (-1)      | Neutral           | Neutral | Serious (-1)      | Serious (-1) | Very low |
| Lu<br>(2019)       | 6MWT                | Neutral           | Neutral           | Neutral | Serious (-1)      | Neutral      | Moderate |
|                    | STS 10              | Neutral           | Serious (-1)      | Neutral | Serious (-1)      | Serious (-1) | Very low |
|                    | HGS                 | Neutral           | Neutral           | Neutral | Serious (-1)      | Serious (-1) | Moderate |
|                    | Muscle strength     | Neutral           | Neutral           | Neutral | Serious (-1)      | Serious (-1) | Moderate |
|                    | STS 30              | Neutral           | Neutral           | Neutral | Serious (-1)      | Serious (-1) | Moderate |
| Chen<br>(2019)     | SBP                 | Serious (-1)      | Neutral           | Neutral | Serious (-1)      | Serious (-1) | Very low |
|                    | DBP                 | Serious (-1)      | Serious (-1)      | Neutral | Serious (-1)      | Serious (-1) | Very low |
|                    | BMI                 | Serious (-1)      | Neutral           | Neutral | Serious (-1)      | Serious (-1) | Very low |
|                    | VO <sub>2peak</sub> | Serious (-1)      | Neutral           | Neutral | Serious (-1)      | Serious (-1) | Very low |
| Song<br>(2018)     | RLS                 | Serious (-1)      | Serious (-1)      | Neutral | Very serious (-2) | Serious (-1) | Very low |
|                    | Fatigue             | Serious (-1)      | Neutral           | Neutral | Serious (-1)      | Serious (-1) | Very low |
| Salhab<br>(2019)   | PCS                 | Not reported (-1) | Serious (-1)      | Neutral | Very serious (-2) | Serious (-1) | Very low |
|                    | MCS                 | Not reported (-1) | Serious (-1)      | Neutral | Serious (-1)      | Serious (-1) | Very low |
| Andrade<br>(2019)  | VO <sub>2peak</sub> | Neutral           | Neutral           | Neutral | Serious (-1)      | Serious (-1) | Moderate |
| Chung<br>(2019)    | 6MWT                | Neutral           | Neutral           | Neutral | Serious (-1)      | Serious (-1) | Moderate |
|                    | VO <sub>2peak</sub> | Neutral           | Serious (-1)      | Neutral | Serious (-1)      | Serious (-1) | Very low |
|                    | PCS                 | Neutral           | Neutral           | Neutral | Serious (-1)      | Serious (-1) | Moderate |
|                    | MCS                 | Neutral           | Neutral           | Neutral | Serious (-1)      | Serious (-1) | Moderate |
| Zhang<br>(2021)    | 6MWT                | Serious (-1)      | Neutral           | Neutral | Serious (-1)      | Serious (-1) | Very low |
|                    | STS 30              | Serious (-1)      | Neutral           | Neutral | Serious (-1)      | Serious (-1) | Very low |

|                    |                     |                   |              |         |              |                   |          |
|--------------------|---------------------|-------------------|--------------|---------|--------------|-------------------|----------|
|                    | HGS                 | Serious (-1)      | Neutral      | Neutral | Serious (-1) | Serious (-1)      | Very low |
|                    | PCS                 | Very serious (-2) | Neutral      | Neutral | Serious (-1) | Serious (-1)      | Very low |
|                    | MCS                 | Very serious (-2) | Neutral      | Neutral | Serious (-1) | Serious (-1)      | Very low |
| Pu<br>(2019)       | Kt/V                | Serious (-1)      | Neutral      | Neutral | Serious (-1) | Not reported (-1) | Very low |
|                    | VO <sub>2peak</sub> | Neutral           | Serious (-1) | Neutral | Neutral      | Not reported (-1) | Moderate |
|                    | 6MWT                | Neutral           | Neutral      | Neutral | Serious (-1) | Serious (-1)      | Moderate |
|                    | PCS                 | Neutral           | Serious (-1) | Neutral | Serious (-1) | Not reported (-1) | Very low |
|                    | MCS                 | Neutral           | Neutral      | Neutral | Serious (-1) | Serious (-1)      | Moderate |
|                    | SBP                 | Serious (-1)      | Neutral      | Neutral | Serious (-1) | Serious (-1)      | Very low |
|                    | DBP                 | Serious (-1)      | Neutral      | Neutral | Serious (-1) | Serious (-1)      | Very low |
| Yamamoto<br>(2021) | SBP                 | Very serious (-2) | Serious (-1) | Neutral | Serious (-1) | Serious (-1)      | Very low |
|                    | VO <sub>2peak</sub> | Very serious (-2) | Neutral      | Neutral | Serious (-1) | Neutral           | Very low |
|                    | BMI                 | Very serious (-2) | Neutral      | Neutral | Neutral      | Neutral           | Low      |
| Thompson<br>(2019) | SBP                 | Very serious (-2) | Serious (-1) | Neutral | Serious (-1) | Serious (-1)      | Very low |
|                    | DBP                 | Very serious (-2) | Serious (-1) | Neutral | Serious (-1) | Serious (-1)      | Very low |
| Yang<br>(2017)     | VO <sub>2peak</sub> | Neutral           | Neutral      | Neutral | Serious (-1) | Serious (-1)      | Low      |
| Clarkson<br>(2019) | 6MWT                | Neutral           | Neutral      | Neutral | Neutral      | Serious (-1)      | Moderate |
| Zhao<br>(2019)     | Fatigue             | Neutral           | Neutral      | Neutral | Serious (-1) | Serious (-1)      | Low      |
|                    | PCS                 | Neutral           | Neutral      | Neutral | Serious (-1) | Serious (-1)      | Low      |
|                    | MCS                 | Neutral           | Serious (-1) | Neutral | Serious (-1) | Serious (-1)      | Very low |
| Zhang<br>(2019)    | SBP                 | Neutral           | Serious (-1) | Neutral | Neutral      | Neutral           | Moderate |
|                    | DBP                 | Neutral           | Serious (-1) | Neutral | Serious (-1) | Neutral           | Low      |
|                    | BMI                 | Serious (-1)      | Neutral      | Neutral | Neutral      | Neutral           | Moderate |

1  
2  
3  
4  
5  
6  
7  
8  
9  
10  
11  
12  
13  
14  
15  
16  
17  
18  
19  
20  
21  
22  
23  
24  
25  
26  
27  
28  
29  
30  
31  
32  
33  
34  
35  
36  
37  
38  
39  
40  
41  
42  
43  
44  
45  
46

|                     |                     |                   |                   |         |                   |                   |          |
|---------------------|---------------------|-------------------|-------------------|---------|-------------------|-------------------|----------|
| Huang<br>(2019)     | Kt/V                | Very serious (-2) | Neutral           | Neutral | Serious (-1)      | Serious (-1)      | Very low |
|                     | SBP                 | Neutral           | Neutral           | Neutral | Serious (-1)      | Serious (-1)      | Low      |
|                     | DBP                 | Neutral           | Serious (-1)      | Neutral | Serious (-1)      | Serious (-1)      | Very low |
|                     | 6MWT                | Serious (-1)      | Very serious (-2) | Neutral | Serious (-1)      | Serious (-1)      | Very low |
|                     | PCS                 | Neutral           | Neutral           | Neutral | Serious (-1)      | Serious (-1)      | Low      |
|                     | MCS                 | Neutral           | Neutral           | Neutral | Serious (-1)      | Serious (-1)      | Low      |
|                     | VO <sub>2peak</sub> | Serious (-1)      | Neutral           | Neutral | Serious (-1)      | Neutral           | Low      |
| Heiwe<br>(2011)     | Aerobic capacity    | Neutral           | Neutral           | Neutral | Neutral           | Serious (-1)      | Moderate |
|                     | Muscle strength     | Neutral           | Neutral           | Neutral | Serious (-1)      | Serious (-1)      | Low      |
|                     | Walking capacity    | Neutral           | Neutral           | Neutral | Serious (-1)      | Serious (-1)      | Low      |
|                     | SBP                 | Neutral           | Neutral           | Neutral | Serious (-1)      | Serious (-1)      | Low      |
|                     | DBP                 | Neutral           | Neutral           | Neutral | Neutral           | Neutral           | High     |
| Heiwe<br>(2014)     | Aerobic capacity    | Neutral           | Neutral           | Neutral | Serious (-1)      | Not reported (-1) | Low      |
|                     | DBP                 | Neutral           | Neutral           | Neutral | Serious (-1)      | Not reported (-1) | Low      |
|                     | SBP                 | Neutral           | Serious (-1)      | Neutral | Serious (-1)      | Not reported (-1) | Very low |
|                     | Muscle strength     | Serious (-1)      | Neutral           | Neutral | Serious (-1)      | Not reported (-1) | Very low |
|                     | Walking capacity    | Neutral           | Neutral           | Neutral | Serious (-1)      | Not reported (-1) | Low      |
| Matsuzawa<br>(2017) | VO <sub>2peak</sub> | Neutral           | Neutral           | Neutral | Neutral           | Neutral           | High     |
|                     | 6MWT                | Serious (-1)      | Serious (-1)      | Neutral | Serious (-1)      | Neutral           | Very low |
|                     | Muscle strength     | Serious (-1)      | Neutral           | Neutral | Serious (-1)      | Serious (-1)      | Very low |
|                     | PCS                 | Very serious (-2) | Neutral           | Neutral | Serious (-1)      | Serious (-1)      | Very low |
|                     | MCS                 | Very serious (-2) | Neutral           | Neutral | Serious (-1)      | Serious (-1)      | Very low |
| Smart<br>(2011)     | VO <sub>2peak</sub> | Neutral           | Serious (-1)      | Neutral | Neutral           | Serious (-1)      | Low      |
| Bogataj             | 6MWT                | Serious (-1)      | Serious (-1)      | Neutral | Not reported (-1) | Not reported (-1) | Very low |

|                    |                           |                   |                   |         |                   |                   |          |
|--------------------|---------------------------|-------------------|-------------------|---------|-------------------|-------------------|----------|
| (2020)             | VO <sub>2peak</sub>       | Very serious (-2) | Serious (-1)      | Neutral | Not reported (-1) | Not reported (-1) | Very low |
|                    | STS 10                    | Neutral           | Serious (-1)      | Neutral | Not reported (-1) | Serious (-1)      | Very low |
| Sheng<br>(2014)    | Kt/V                      | Serious (-1)      | Neutral           | Neutral | Serious (-1)      | Serious (-1)      | Very low |
|                    | VO <sub>2peak</sub>       | Serious (-1)      | Neutral           | Neutral | Serious (-1)      | Serious (-1)      | Very low |
|                    | PCS                       | Serious (-1)      | Neutral           | Neutral | Serious (-1)      | Serious (-1)      | Very low |
|                    | MCS                       | Serious (-1)      | Neutral           | Neutral | Serious (-1)      | Serious (-1)      | Very low |
|                    | 6MWT                      | Serious (-1)      | Very serious (-2) | Neutral | Serious (-1)      | Serious (-1)      | Very low |
|                    | DBP                       | Serious (-1)      | Serious (-1)      | Neutral | Serious (-1)      | Serious (-1)      | Very low |
|                    | SBP                       | Serious (-1)      | Neutral           | Neutral | Serious (-1)      | Serious (-1)      | Very low |
| Neto<br>(2018)     | STS60                     | Serious (-1)      | Neutral           | Neutral | Serious (-1)      | Serious (-1)      | Very low |
|                    | VO <sub>2peak</sub>       | Serious (-1)      | Very serious (-2) | Neutral | Serious (-1)      | Not reported (-1) | Very low |
|                    | PCS                       | Serious (-1)      | Serious (-1)      | Neutral | Serious (-1)      | Serious (-1)      | Very low |
|                    | MCS                       | Serious (-1)      | Serious (-1)      | Neutral | Serious (-1)      | Serious (-1)      | Very low |
|                    | 6MWT                      | Serious (-1)      | Very serious (-2) | Neutral | Serious (-1)      | Serious (-1)      | Very low |
| Ferrari<br>(2019)  | Muscle strength           | Neutral           | Serious (-1)      | Neutral | Serious (-1)      | Serious (-1)      | Very low |
|                    | Kt/V (AE)                 | Neutral           | Serious (-1)      | Neutral | Serious (-1)      | Neutral           | Low      |
|                    | Kt/V (RT)                 | Serious (-1)      | Neutral           | Neutral | Serious (-1)      | Serious (-1)      | Very low |
|                    | VO <sub>2peak</sub> (COM) | Neutral           | Neutral           | Neutral | Serious (-1)      | Serious (-1)      | Low      |
|                    | VO <sub>2peak</sub> (AE)  | Serious (-1)      | Neutral           | Neutral | Serious (-1)      | Serious (-1)      | Very low |
|                    | 6MWT (RT)                 | Neutral           | Neutral           | Neutral | Serious (-1)      | Serious (-1)      | Low      |
|                    | 6MWT(AE)                  | Neutral           | Neutral           | Neutral | Serious (-1)      | Serious (-1)      | Low      |
|                    | SBP                       | Serious (-1)      | Neutral           | Neutral | Serious (-1)      | Neutral           | Low      |
| Wyngaert<br>(2018) | DBP                       | Serious (-1)      | Neutral           | Neutral | Serious (-1)      | Neutral           | Low      |
|                    | SBP                       | Serious (-1)      | Serious (-1)      | Neutral | Serious (-1)      | Serious (-1)      | Very low |
| Wyngaert<br>(2018) | DBP                       | Serious (-1)      | Very serious (-2) | Neutral | Serious (-1)      | Serious (-1)      | Very low |



1  
2  
3  
4  
5  
6  
7  
8  
9  
10  
11  
12  
13  
14  
15  
16  
17  
18  
19  
20  
21  
22  
23  
24  
25  
26  
27  
28  
29  
30  
31  
32  
33  
34  
35  
36  
37  
38  
39  
40  
41  
42  
43  
44  
45  
46

|               |                                   |                   |                   |         |              |                   |          |
|---------------|-----------------------------------|-------------------|-------------------|---------|--------------|-------------------|----------|
|               | VO <sub>2peak</sub>               | Serious (-1)      | Very serious (-2) | Neutral | Serious (-1) | Neutral           | Very low |
|               | BMI                               | Serious (-1)      | Neutral           | Neutral | Serious (-1) | Neutral           | Low      |
| Oguchi (2018) | VO <sub>2peak</sub>               | Neutral           | Neutral           | Neutral | Serious (-1) | Serious (-1)      | Low      |
|               | HRQoL                             | Serious (-1)      | Serious (-1)      | Neutral | Serious (-1) | Serious (-1)      | Very low |
| Ju (2020)     | HGS                               | Very serious (-2) | Neutral           | Neutral | Serious (-1) | Neutral           | Very low |
|               | Symptom/problem (KDQoL)           | Very serious (-2) | Very serious (-2) | Neutral | Serious (-1) | Not reported (-1) | Very low |
|               | effects of kidney disease (KDQoL) | Very serious (-2) | Very serious (-2) | Neutral | Serious (-1) | Not reported (-1) | Very low |
|               | burden of kidney disease (KDQoL)  | Very serious (-2) | Very serious (-2) | Neutral | Serious (-1) | Not reported (-1) | Very low |

Abbreviation: AE = aerobic exercise; RT = resistance training; COM = combine; VO<sub>2peak</sub> = peak oxygen uptake; HRQoL = health-related quality of life; DBP = diastolic blood pressure; SBP = systolic blood pressure; PCS = physical component summary; MCS = mental component summary; 6MWT = 6 minutes walk test; STS 10 = sit to stand 10 test; STS 30 = sit to stand 30 test; STS 60 = sit to stand 60 test; TUGT = timed up and go test; BMI = body mass index; SMD = standardized mean difference; HD = hemodialysis; KTRs = kidney transplant recipients; SF-36 = short form-36; KDQoL = kidney disease quality of life;

Very serious mean the included studies existed two or more high risk of bias in terms of randomization, blinding, allocation concealment, completeness of result data, or selective reporting, or  $75\% \leq I^2 \leq 100\%$ .

Serious mean the included studies existed two or more high risk of bias in terms of randomization, blinding, allocation concealment, completeness of result data, or selective reporting, or  $50\% \leq I^2 < 75\%$ , or the included study sample size < 400, asymmetric funnel plot or less than 9 studies included.

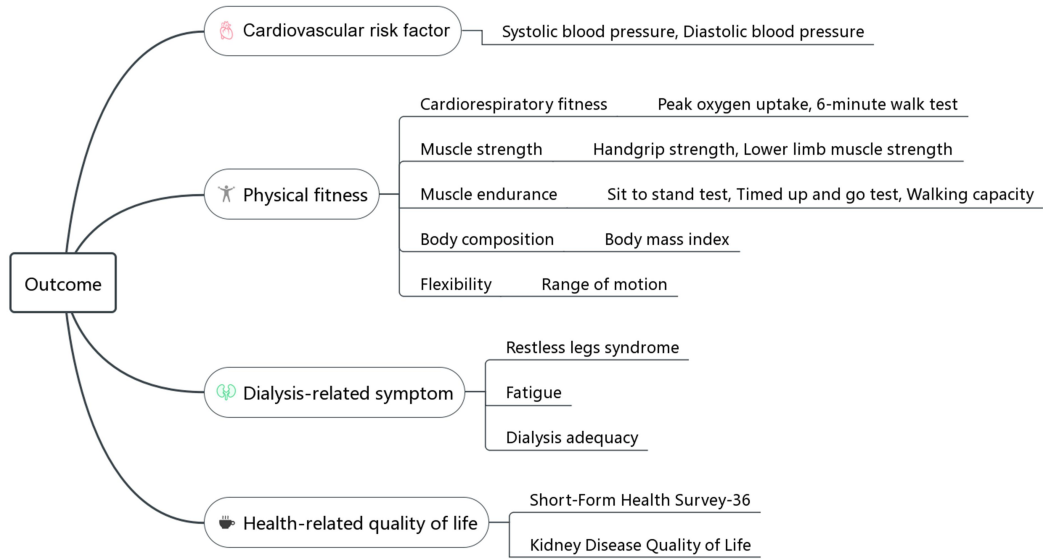

**Supplemental Figures S1**

peer review only

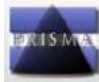

## PRISMA 2020 Checklist

| Section and Topic             | Item # | Checklist item                                                                                                                                                                                                                                                                                       | Location where item is reported |
|-------------------------------|--------|------------------------------------------------------------------------------------------------------------------------------------------------------------------------------------------------------------------------------------------------------------------------------------------------------|---------------------------------|
| <b>TITLE</b>                  |        |                                                                                                                                                                                                                                                                                                      |                                 |
| Title                         | 1      | Identify the report as a systematic review.                                                                                                                                                                                                                                                          | Page 1                          |
| <b>ABSTRACT</b>               |        |                                                                                                                                                                                                                                                                                                      |                                 |
| Abstract                      | 2      | See the PRISMA 2020 for Abstracts checklist.                                                                                                                                                                                                                                                         | Page 2                          |
| <b>INTRODUCTION</b>           |        |                                                                                                                                                                                                                                                                                                      |                                 |
| Rationale                     | 3      | Describe the rationale for the review in the context of existing knowledge.                                                                                                                                                                                                                          | Page 4                          |
| Objectives                    | 4      | Provide an explicit statement of the objective(s) or question(s) the review addresses.                                                                                                                                                                                                               | Page 4                          |
| <b>METHODS</b>                |        |                                                                                                                                                                                                                                                                                                      |                                 |
| Eligibility criteria          | 5      | Specify the inclusion and exclusion criteria for the review and how studies were grouped for the syntheses.                                                                                                                                                                                          | Page 4-5                        |
| Information sources           | 6      | Specify all databases, registers, websites, organisations, reference lists and other sources searched or consulted to identify studies. Specify the date when each source was last searched or consulted.                                                                                            |                                 |
| Search strategy               | 7      | Present the full search strategies for all databases, registers and websites, including any filters and limits used.                                                                                                                                                                                 | Page 4                          |
| Selection process             | 8      | Specify the methods used to decide whether a study met the inclusion criteria of the review, including how many reviewers screened each record and each report retrieved, whether they worked independently, and if applicable, details of automation tools used in the process.                     | Page 5                          |
| Data collection process       | 9      | Specify the methods used to collect data from reports, including how many reviewers collected data from each report, whether they worked independently, any processes for obtaining or confirming data from study investigators, and if applicable, details of automation tools used in the process. | Page 5                          |
| Data items                    | 10a    | List and define all outcomes for which data were sought. Specify whether all results that were compatible with each outcome domain in each study were sought (e.g. for all measures, time points, analyses), and if not, the methods used to decide which results to collect.                        | Page 4-5                        |
|                               | 10b    | List and define all other variables for which data were sought (e.g. participant and intervention characteristics, funding sources). Describe any assumptions made about any missing or unclear information.                                                                                         | Page 5                          |
| Study risk of bias assessment | 11     | Specify the methods used to assess risk of bias in the included studies, including details of the tool(s) used, how many reviewers assessed each study and whether they worked independently, and if applicable, details of automation tools used in the process.                                    | Page 5                          |
| Effect measures               | 12     | Specify for each outcome the effect measure(s) (e.g. risk ratio, mean difference) used in the synthesis or presentation of results.                                                                                                                                                                  | Page 5-6                        |
| Synthesis methods             | 13a    | Describe the processes used to decide which studies were eligible for each synthesis (e.g. tabulating the study intervention characteristics and comparing against the planned groups for each synthesis (item #5)).                                                                                 | Page 4-5                        |
|                               | 13b    | Describe any methods required to prepare the data for presentation or synthesis, such as handling of missing summary statistics, or data conversions.                                                                                                                                                | Page 5                          |
|                               | 13c    | Describe any methods used to tabulate or visually display results of individual studies and syntheses.                                                                                                                                                                                               | None                            |
|                               | 13d    | Describe any methods used to synthesize results and provide a rationale for the choice(s). If meta-analysis was performed, describe the model(s), method(s) to identify the presence and extent of statistical heterogeneity, and software package(s) used.                                          | Not applicable                  |
|                               | 13e    | Describe any methods used to explore possible causes of heterogeneity among study results (e.g. subgroup analysis, meta-regression).                                                                                                                                                                 | None                            |
|                               | 13f    | Describe any sensitivity analyses conducted to assess robustness of the synthesized results.                                                                                                                                                                                                         | None                            |
| Reporting bias assessment     | 14     | Describe any methods used to assess risk of bias due to missing results in a synthesis (arising from reporting biases).                                                                                                                                                                              | None                            |
| Certainty                     | 15     | Describe any methods used to assess certainty (or confidence) in the body of evidence for an outcome.                                                                                                                                                                                                | Page 6                          |

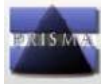

## PRISMA 2020 Checklist

1  
2  
3  
4  
5  
6  
7  
8  
9  
10  
11  
12  
13  
14  
15  
16  
17  
18  
19  
20  
21  
22  
23  
24  
25  
26  
27  
28  
29  
30  
31  
32  
33  
34  
35  
36  
37  
38  
39  
40  
41  
42  
43  
44  
45  
46  
47

| Section and Topic                              | Item # | Checklist item                                                                                                                                                                                                                                                                                                                                                                           | Location where item is reported |
|------------------------------------------------|--------|------------------------------------------------------------------------------------------------------------------------------------------------------------------------------------------------------------------------------------------------------------------------------------------------------------------------------------------------------------------------------------------|---------------------------------|
| assessment                                     |        |                                                                                                                                                                                                                                                                                                                                                                                          |                                 |
| <b>RESULTS</b>                                 |        |                                                                                                                                                                                                                                                                                                                                                                                          |                                 |
| Study selection                                | 16a    | Describe the results of the search and selection process, from the number of records identified in the search to the number of studies included in the review, ideally using a flow diagram.                                                                                                                                                                                             | Page 6                          |
|                                                | 16b    | Cite studies that might appear to meet the inclusion criteria, but which were excluded, and explain why they were excluded.                                                                                                                                                                                                                                                              | Page 6                          |
| Study characteristics                          | 17     | Cite each included study and present its characteristics.                                                                                                                                                                                                                                                                                                                                | Page 6                          |
| Risk of bias in studies                        | 18     | Present assessments of risk of bias for each included study.                                                                                                                                                                                                                                                                                                                             | Page 6                          |
| Results of individual studies                  | 19     | For all outcomes, present, for each study: (a) summary statistics for each group (where appropriate) and (b) an effect estimate and its precision (e.g. confidence/credible interval), ideally using structured tables or plots.                                                                                                                                                         | Page 18-32                      |
| Results of syntheses                           | 20a    | For each synthesis, briefly summarise the characteristics and risk of bias among contributing studies.                                                                                                                                                                                                                                                                                   | Not applicable                  |
|                                                | 20b    | Present results of all statistical syntheses conducted. If meta-analysis was done, present for each the summary estimate and its precision (e.g. confidence/credible interval) and measures of statistical heterogeneity. If comparing groups, describe the direction of the effect.                                                                                                     | Not applicable                  |
|                                                | 20c    | Present results of all investigations of possible causes of heterogeneity among study results.                                                                                                                                                                                                                                                                                           | Not applicable                  |
|                                                | 20d    | Present results of all sensitivity analyses conducted to assess the robustness of the synthesized results.                                                                                                                                                                                                                                                                               | None                            |
| Reporting biases                               | 21     | Present assessments of risk of bias due to missing results (arising from reporting biases) for each synthesis assessed.                                                                                                                                                                                                                                                                  | Page 6                          |
| Certainty of evidence                          | 22     | Present assessments of certainty (or confidence) in the body of evidence for each outcome assessed.                                                                                                                                                                                                                                                                                      | Page 6                          |
| <b>DISCUSSION</b>                              |        |                                                                                                                                                                                                                                                                                                                                                                                          |                                 |
| Discussion                                     | 23a    | Provide a general interpretation of the results in the context of other evidence.                                                                                                                                                                                                                                                                                                        | Page 10                         |
|                                                | 23b    | Discuss any limitations of the evidence included in the review.                                                                                                                                                                                                                                                                                                                          | Page 12                         |
|                                                | 23c    | Discuss any limitations of the review processes used.                                                                                                                                                                                                                                                                                                                                    | Page 12                         |
|                                                | 23d    | Discuss implications of the results for practice, policy, and future research.                                                                                                                                                                                                                                                                                                           | None                            |
| <b>OTHER INFORMATION</b>                       |        |                                                                                                                                                                                                                                                                                                                                                                                          |                                 |
| Registration and protocol                      | 24a    | Provide registration information for the review, including register name and registration number, or state that the review was not registered.                                                                                                                                                                                                                                           | Page 2                          |
|                                                | 24b    | Indicate where the review protocol can be accessed, or state that a protocol was not prepared.                                                                                                                                                                                                                                                                                           | Page 2                          |
|                                                | 24c    | Describe and explain any amendments to information provided at registration or in the protocol.                                                                                                                                                                                                                                                                                          | None                            |
| Support                                        | 25     | Describe sources of financial or non-financial support for the review, and the role of the funders or sponsors in the review.                                                                                                                                                                                                                                                            | Page 1                          |
| Competing interests                            | 26     | Declare any competing interests of review authors.                                                                                                                                                                                                                                                                                                                                       | Page 1                          |
| Availability of data, code and other materials | 27     | Report which of the following are publicly available and where they can be found: template data collection forms; data extracted from included studies; data used for all analyses; analytic code; any other materials used in the review.<br>For peer review only - <a href="http://bmjopen.bmj.com/site/about/guidelines.xhtml">http://bmjopen.bmj.com/site/about/guidelines.xhtml</a> | Page 1                          |

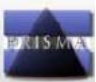

PRISMA 2020 Checklist

- 1
- 2
- 3
- 4
- 5
- 6
- 7
- 8
- 9
- 10
- 11
- 12
- 13
- 14
- 15
- 16
- 17
- 18
- 19
- 20
- 21
- 22
- 23
- 24
- 25
- 26
- 27
- 28
- 29
- 30
- 31
- 32
- 33
- 34
- 35
- 36
- 37
- 38
- 39
- 40
- 41
- 42
- 43
- 44
- 45
- 46
- 47

From: Page MJ, McKenzie JE, Bossuyt PM, Boutron I, Hoffmann TC, Mulrow CD, et al. The PRISMA 2020 statement: an updated guideline for reporting systematic reviews. BMJ 2021;372:n71. doi: 10.1136/bmj.n71

For more information, visit: <http://www.prisma-statement.org/>

For peer review only
