# Supplementary material for: Therapeutic effects of exercise interventions for patients with chronic kidney disease: an umbrella review of systematic reviews and meta-analyses
Source: PubMed Central journal article supplement — BMJ Open. 2022 Sep 19;12(9):e054887. doi: 10.1136/bmjopen-2021-054887 (PMC9486234; doi:10.1136/bmjopen-2021-054887), 2022-09-19
Supplement: bmjopen-2021-054887supp002.pdf [file bmjopen-2021-054887supp002.pdf]

**Supplementary Table S1 The detailed search strategy**

| Databases | #  | Search strategy                                                                                                                                                                        |
|-----------|----|----------------------------------------------------------------------------------------------------------------------------------------------------------------------------------------|
| Pubmed    | 1  | "renal insufficiency, chronic"[MeSH Terms]                                                                                                                                             |
|           | 2  | "chronic renal insufficiency"[Title/Abstract] or "chronic kidney insufficiency"[Title/Abstract] or "chronic kidney disease"[Title/Abstract] or "chronic renal disease"[Title/Abstract] |
|           | 3  | "CKD"[Title/Abstract] or "CKF"[Title/Abstract] or "CRD"[Title/Abstract] or "CRF"[Title/Abstract]                                                                                       |
|           | 4  | "end-stage kidney"[Title/Abstract] or "end-stage renal"[Title/Abstract] or "endstage kidney"[Title/Abstract] or "endstage renal"[Title/Abstract]                                       |
|           | 5  | "ESRD"[Title/Abstract] or "ESRF"[Title/Abstract] or "ESKD"[Title/Abstract] or "ESKF"[Title/Abstract]                                                                                   |
|           | 6  | "Renal Replacement Therapy"[MeSH Terms]                                                                                                                                                |
|           | 7  | "dialysis"[Title/Abstract]                                                                                                                                                             |
|           | 8  | "hemodialysis"[Title/Abstract] or "haemodialysis"[Title/Abstract] or "hemodiafiltration"[Title/Abstract] or "haemodiafiltration"[Title/Abstract] or "HD"[Title/Abstract]               |
|           | 9  | "PD"[Title/Abstract]                                                                                                                                                                   |
|           | 10 | "renal transplantation"[Title/Abstract] or "kidney grafting"[Title/Abstract] or "kidney transplantation"[Title/Abstract]                                                               |
|           | 11 | "KTRs"[Title/Abstract]                                                                                                                                                                 |
|           | 12 | #1 or #2 or #3 or #4 or #5 or #6 or #7 or #8 or #9 or #10 or #11                                                                                                                       |
|           | 13 | "Exercise"[MeSH Terms]                                                                                                                                                                 |
|           | 14 | "Exercise Movement Techniques"[MeSH Terms]                                                                                                                                             |
|           | 15 | "Exercise Therapy"[MeSH Terms]                                                                                                                                                         |
|           | 16 | "Sports"[MeSH Terms]                                                                                                                                                                   |
|           | 17 | "train"[Title/Abstract] or "physical activity"[Title/Abstract] or "exercise"[Title/Abstract]                                                                                           |
|           | 18 | #13 or #14 or #15 or #16 or #17                                                                                                                                                        |
|           | 19 | "Systematic Review"[Publication Type] or "Systematic Reviews as Topic"[MeSH Terms]                                                                                                     |
|           | 20 | "meta analysis"[Publication Type] or "Meta-Analysis as Topic"[MeSH Terms]                                                                                                              |

|      |    |                                                                                                                                    |
|------|----|------------------------------------------------------------------------------------------------------------------------------------|
|      | 21 | "Systematic Review"[Title/Abstract] or "system review"[Title/Abstract] or "data pooling"[Title/Abstract] or "meta"[Title/Abstract] |
|      | 22 | #19 or #20 or #21                                                                                                                  |
|      | 23 | #12 and #18 and #22                                                                                                                |
| CDSR | 1  | MeSH descriptor: [Kidney Diseases] explode all trees                                                                               |
|      | 2  | ("chronic kidney disease") or ("chronic renal disease") or ("chronic kidney failure") or ("chronic renal failure"):ti,ab,kw        |
|      | 3  | (CKF or CKD or CRF or CRD):ti,ab,kw                                                                                                |
|      | 4  | ("end-stage kidney") or ("end-stage renal") or ("endstage kidney") or ("endstage renal"):ti,ab,kw                                  |
|      | 5  | ESRD or ESRF or ESKD or ESKF:ti,ab,kw                                                                                              |
|      | 6  | MeSH descriptor: [Renal Replacement Therapy] explode all trees                                                                     |
|      | 7  | dialysis:ti,ab,kw                                                                                                                  |
|      | 8  | (hemodialysis or haemodialysis or hemodiafiltration or haemodiafiltration or HD):ti,ab,kw                                          |
|      | 9  | PD:ti,ab,kw                                                                                                                        |
|      | 10 | ("renal transplantation") or ("kidney grafting") or ("kidney transplantation"):ti,ab,kw                                            |
|      | 11 | KTRs:ti,ab,kw                                                                                                                      |
|      | 12 | #1 or #2 or #3 or #4 or #5 or #6 or #7 or #8 or #9 or #10 or #11                                                                   |
|      | 13 | MeSH descriptor: [Exercise] explode all trees                                                                                      |
|      | 14 | MeSH descriptor: [Exercise Movement Techniques] explode all trees                                                                  |
|      | 15 | MeSH descriptor: [Exercise Therapy] explode all trees                                                                              |
|      | 16 | MeSH descriptor: [Sports] explode all trees                                                                                        |
|      | 17 | (train or ("physical activity") or exercise):ti,ab,kw                                                                              |
|      | 18 | #13 or #14 or #15 or #16 or #17                                                                                                    |
|      | 19 | MeSH descriptor: [Meta-Analysis as Topic] explode all trees                                                                        |
|      | 20 | MeSH descriptor: [Systematic Reviews as Topic] explode all trees                                                                   |
|      | 21 | ("systematic review") or ("system review") or ("data pooling") or (meta):ti,ab,kw                                                  |
|      | 22 | #19 or #20 or #21                                                                                                                  |

|                |    |                                                                                                                                              |
|----------------|----|----------------------------------------------------------------------------------------------------------------------------------------------|
|                | 23 | #12 and #18 and #22                                                                                                                          |
| Embase         | 1  | 'kidney disease'/exp                                                                                                                         |
|                | 2  | ('chronic kidney disease' or 'chronic renal disease' or 'chronic kidney failure' or 'chronic renal failure'):ti,ab,kw                        |
|                | 3  | (CKF or CKD or CRFor CRD):ti,ab,kw                                                                                                           |
|                | 4  | ('end-stage kidney' or 'end-stage renal' or 'endstage kidney' or 'endstage renal'):ti,ab,kw                                                  |
|                | 5  | (ESRD or ESRF or ESKD or ESKF):ti,ab,kw                                                                                                      |
|                | 6  | 'renal replacement therapy'/exp                                                                                                              |
|                | 7  | 'dialysis':ti,ab,kw                                                                                                                          |
|                | 8  | (hemodialysis or haemodialysis or hemofiltration or haemofiltration or hemodiafiltration or haemodiafiltration or HD):ti,ab,kw               |
|                | 9  | PD:ti,ab,kw                                                                                                                                  |
|                | 10 | ('renal transplantation' or 'kidney grafting' or 'kidney transplantation'):ti,ab,kw                                                          |
|                | 11 | KTRs:ti,ab,kw                                                                                                                                |
|                | 12 | #1 or #2 or #3 or #4 or #5 or #6 or #7 or #8 or #9 or #10 or #11                                                                             |
|                | 13 | 'exercise'/exp                                                                                                                               |
|                | 14 | 'physical activity'/exp                                                                                                                      |
|                | 15 | 'sport'/exp                                                                                                                                  |
|                | 16 | (train or 'physical activity' or exercise):ti,ab,kw                                                                                          |
|                | 17 | #13 or #14 or #15 or #16                                                                                                                     |
|                | 18 | 'systematic review (topic)'/exp or 'systematic review'/exp                                                                                   |
|                | 19 | 'meta analysis (topic)'/exp or 'meta analysis'/exp                                                                                           |
|                | 20 | ('systematic review' or 'system review' or 'data pooling' or meta):ti,ab,kw                                                                  |
|                | 21 | #18 or #19 or #20                                                                                                                            |
|                | 22 | #12 and #17 and #21                                                                                                                          |
| Web of Science | 1  | TS: ("chronic kidney disease" or "chronic renal disease" or "chronic kidney failure" or "chronic renal failure" or CKD or CRD or CKF or CRF) |

|  |   |                                                                                                                                                                            |
|--|---|----------------------------------------------------------------------------------------------------------------------------------------------------------------------------|
|  | 2 | TS: ("end-stage kidney" or "end-stage renal" or "endstage kidney" or "endstage renal" or ESKD or ESKF or ESRD or ESRF)                                                     |
|  | 3 | TS: ("renal replacement therapy" or dialysis or hemodialysis or haemodialysis or hemofiltration or haemofiltration or hemodiafiltration or haemodiafiltration or HD or PD) |
|  | 4 | TS: ("renal transplantation" or "kidney grafting" or "kidney transplantation" or KTRs)                                                                                     |
|  | 5 | #1 or #2 or #3 or #4                                                                                                                                                       |
|  | 6 | TS: (train or exercise or "physical activity")                                                                                                                             |
|  | 7 | TS: ("systematic review" or "system review" or "data pooling" or meta)                                                                                                     |
|  | 8 | #1 and #2 and #3 and #4 and #5                                                                                                                                             |

**Supplementary Table S2** The characteristic of excluded studies

| Studies                 | Reasons for exclusion           |
|-------------------------|---------------------------------|
| Nantakool et al (2020)  | Non predefine outcome           |
| Sawant et al (2014)     | Non predefine outcome           |
| Smart et al (2014)      | Duplicate literature            |
| Barcellos et al (2015)  | Meta-analysis was not conducted |
| Yang et al (2020)       | Non predefine outcome           |
| Young et al (2018)      | Included cases<100              |
| Phan et al (2015)       | Duplicate literature            |
| Molsted et al (2019)    | Included cases<100              |
| Segura et al (2010)     | Non-English                     |
| Ferreira et al (2020)   | Non predefine outcome           |
| Koufaki et al (2013)    | Meta-analysis was not conducted |
| Smart et al (2012)      | Abstracts                       |
| Howden et al (2012)     | Meta-analysis was not conducted |
| Calella et al (2019)    | Meta-analysis was not conducted |
| Singh et al (2005)      | Meta-analysis was not conducted |
| Cardoso et al (2020)    | Non predefine outcome           |
| Villanego et al (2020)  | Non-English                     |
| Medeiros et al (2017)   | Intervention did not fit        |
| Macdonald et al (2009)  | Meta-analysis was not conducted |
| Wen et al (2019)        | Non predefine outcome           |
| Yang et al (2015)       | Non predefine outcome           |
| Thangarasa et al (2018) | Included cases<100              |
| Chan et al (2016)       | Meta-analysis was not conducted |

|                        |                                 |
|------------------------|---------------------------------|
| Johansen et al (2010)  | Intervention did not fit        |
| Thompson et al (2020)  | Correction for published paper  |
| Bakaloudi et al (2020) | Meta-analysis was not conducted |
| Kirkman et al (2019)   | Meta-analysis was not conducted |
| Afsar et al (2018)     | Meta-analysis was not conducted |

Supplementary Table S3 The basic characteristics of the included meta-analyses

| Author (year)   | Design                | Stage of CKD         | k (n)*  | Exercise type | Mode          | Outcomes                  | SMD or MD(95% CI)      | Effect size | P      | I <sup>2</sup> | GRADE    |
|-----------------|-----------------------|----------------------|---------|---------------|---------------|---------------------------|------------------------|-------------|--------|----------------|----------|
| Pei (2019)      | RCT/quasi-RCT         | Mixed                | 17(464) | AE            | -             | VO <sub>2peak</sub>       | MD:2.08 (1.1,3.05)     | -           | <0.001 | 25.0%          | Low      |
|                 |                       |                      | 5 (445) |               |               | STS 60                    | MD:2.08 (1.1,3.05)     | -           | 0.98   | 82.0%          | Very low |
|                 |                       |                      | 8 (496) |               |               | 6MWT                      | MD:0.04 (-0.52, 0.59)  | -           | 0.9    | 86.0%          | Very low |
|                 |                       |                      | 12(514) |               |               | SBP                       | MD:-2.91 (-6.68, 0.87) | -           | 0.13   | 40.0%          | Low      |
|                 |                       |                      | 12(514) |               |               | DBP                       | MD:-1.11 (-3.41, 1.20) | -           | 0.35   | 0.0%           | Low      |
|                 |                       |                      | 6(522)  |               |               | Physical function (SF-36) | MD:8.36(-1.24,17.95)   | -           | 0.09   | 76.0%          | Very low |
|                 |                       |                      | 7(562)  |               |               | Physical role (SF-36)     | MD:14.65(1.47,27.84)   | -           | 0.03   | 78.0%          | Very low |
|                 |                       |                      | 6(447)  |               |               | Social function (SF-36)   | MD:8.24(-1.09,17.58)   | -           | 0.08   | 85.0%          | Very low |
|                 |                       |                      | 6(513)  |               |               | Pain (SF-36)              | MD:5.94(1.65,10.23)    | -           | 0.007  | 49.0%          | Very low |
|                 |                       |                      | 7(562)  |               |               | General health (SF-36)    | MD:8.90(2.48,15.32)    | -           | 0.007  | 71.0%          | Very low |
| 6(542)          | Mental health (SF-36) | MD:7.30(-0.94,15.54) | -       | 0.08          | 84.0%         | Very low                  |                        |             |        |                |          |
| Ferreira (2019) | RCT/quasi-RCT         | HD                   | 10(346) | AE            | Intradialytic | Kt/V                      | SMD:2.21(1.17,3.25)    | Large       | <0.001 | 92.0%          | Very low |
| Cheema (2014)   | RCT                   | Predialysis          | 7(249)  | RT            | -             | Muscle Strength           | SMD:1.15 (0.80-1.49)   | Large       | 0.161  | 35.0%          | Low      |
|                 |                       |                      | 6(223)  |               |               | HRQoL                     | SMD:0.83(0.51-1.16)    | Large       | 0.226  | 27.8%          | Low      |
| Wu (2020)       | RCT/quasi-RCT         | Predialysis          | 3(204)  | AE+RT         | -             | SBP                       | SMD:-0.19(-0.46,0.08)  | Small       | 0.16   | 50.0%          | Very low |
|                 |                       |                      | 4(194)  |               |               | DBP                       | SMD:-0.47(-1.10,0.15)  | Small       | 0.14   | 70.0%          | Very low |

|                 |                |             |         |       |               |                     |                        |          |        |       |          |
|-----------------|----------------|-------------|---------|-------|---------------|---------------------|------------------------|----------|--------|-------|----------|
| Nakamura (2020) | RCT/cross-over | Predialysis | 10(401) | Mixed | -             | VO <sub>2peak</sub> | SMD:0.88(0.53,1.23)    | Large    | <0.001 | 56.0% | Low      |
|                 |                |             | 4(119)  |       |               | Muscle Strength     | SMD:0.35(-0.03,0.73)   | Small    | 0.07   | 7.0%  | Very low |
|                 |                |             | 5(392)  |       |               | 6MWT                | SMD:1.04(0.17,1.90)    | Large    | 0.02   | 92.0% | Very low |
|                 |                |             | 3(170)  |       |               | TUGT                | SMD:-0.42(-0.73,-0.11) | Small    | 0.007  | 0.0%  | Very low |
| Lu (2019)       | RCT            | Dialysis    | 11(300) | Mixed | Mixed         | 6MWT                | MD:67.6(49.93,85.26)   | -        | <0.001 | 30.6% | Moderate |
|                 |                |             | 3(193)  |       |               | STS 10              | MD:-4.69(-9.01,-0.38)  | -        | 0.028  | 72.2% | Very low |
|                 |                |             | 5(234)  |       |               | HGS                 | MD:5.35(3.34,7.37)     | -        | <0.001 | 0.3%  | Low      |
|                 |                |             | 7(224)  |       |               | Muscle strength     | MD:3.67(1.37,5.97)     | -        | 0.020  | 38.6% | Low      |
|                 |                |             | 6(240)  |       |               | STS 30              | MD:2.43(0.91,3.96)     | -        | 0.002  | 21.2% | Low      |
| Chen (2019)     | RCT            | KTRs        | 5(198)  | Mixed | -             | SBP                 | SMD:0.18(-0.10,0.46)   | Small    | 0.21   | 0.0%  | Very low |
|                 |                |             | 5(198)  |       |               | DBP                 | SMD:0.04(-0.45,0.52)   | Small    | 0.89   | 59.0% | Very low |
|                 |                |             | 4(166)  |       |               | BMI                 | SMD:0.02(-0.28,0.33)   | Small    | 0.89   | 0.0%  | Very low |
|                 |                |             | 6(202)  |       |               | VO <sub>2peak</sub> | SMD:0.33(-0.02,0.69)   | Small    | 0.06   | 27.0% | Very low |
| Song (2018)     | RCT            | HD          | 4(141)  | Mixed | Mixed         | RLS                 | SMD:-1.79(-2.21,-1.37) | Large    | <0.001 | 87.0% | Very low |
|                 |                |             | 3(139)  |       |               | Fatigue             | SMD:-0.85(-1.20,-0.50) | Large    | <0.001 | 0.0%  | Very low |
| Salhab (2019)   | RCT            | HD          | 5(282)  | AE    | Intradialytic | PCS                 | SMD:1.82(-0.92,4.55)   | Large    | 0.19   | 98.0% | Very low |
|                 |                |             | 5(282)  |       |               | MCS                 | SMD:1.02(0.31,1.73)    | Large    | 0.005  | 75.0% | Very low |
| Andrade (2019)  | RCT            | HD          | 5(201)  | AE+RT | Intradialytic | VO <sub>2peak</sub> | SMD:1.01(0.71,1.30)    | Large    | <0.001 | 0.0%  | Low      |
| Chung (2016)    | RCT            | HD          | 4(127)  | Mixed | Intradialytic | 6MWT                | SMD:0.44(0.09,0.80)    | Small    | 0.015  | 0.0%  | Low      |
|                 |                |             | 6(238)  |       |               | VO <sub>2peak</sub> | SMD:0.55(0.18,0.92)    | Moderate | 0.003  | 52.9% | Very low |
|                 |                |             | 6(229)  |       |               | PCS                 | SMD:0.46(0.20,0.73)    | Small    | <0.001 | 1.90% | Low      |
|                 |                |             | 5(193)  |       |               | MCS                 | SMD:0.23(-0.05,0.52)   | Small    | 0.109  | 0.0%  | Low      |
| Zhang (2021)    | RCT            | HD          | 8(299)  | RT    | Intradialytic | 6MWT                | SMD:0.52(0.28,0.75)    | Moderate | <0.001 | 18.7% | Very low |
|                 |                |             | 5(164)  |       |               | STS 30              | SMD:0.42(0.11,0.74)    | Small    | 0.008  | 0.0%  | Very low |



|                    |     |             |         |       |               |                     |                        |          |        |       |          |
|--------------------|-----|-------------|---------|-------|---------------|---------------------|------------------------|----------|--------|-------|----------|
|                    |     |             | 6(300)  |       |               | HGS                 | SMD:0.35(0.12,0.58)    | Small    | 0.003  | 41.6% | Very low |
|                    |     |             | 7(297)  |       |               | PCS                 | SMD:0.23(-0.00,0.46)   | Small    | 0.055  | 0.0%  | Very low |
|                    |     |             | 7(297)  |       |               | MCS                 | SMD:0.13(-0.10,0.36)   | Small    | 0.082  | 46.5% | Very low |
| Pu<br>(2019)       | RCT | HD          | 10(301) | Mixed | Intradialytic | Kt/V                | SMD:0.29(0.06,0.52)    | Small    | 0.01   | 0.0%  | Very low |
|                    |     |             | 10(400) |       |               | VO <sub>2peak</sub> | SMD:0.57(0.23,0.90)    | Moderate | <0.001 | 59.0% | Low      |
|                    |     |             | 7(219)  |       |               | 6MWT                | SMD:0.57(0.30,0.84)    | Moderate | <0.001 | 0.0%  | Low      |
|                    |     |             | 10(320) |       |               | PCS                 | SMD:0.57(0.14,1.01)    | Moderate | 0.01   | 70.0% | Very low |
|                    |     |             | 8(219)  |       |               | MCS                 | SMD:0.19(-0.09,0.46)   | Small    | 0.18   | 30.0% | Low      |
|                    |     |             | 7(287)  |       |               | SBP                 | SMD:-0.28(-0.52,-0.05) | Small    | 0.02   | 0.0%  | Very low |
|                    |     |             | 7(287)  |       |               | DBP                 | SMD:-0.32(-0.55,-0.08) | Small    | 0.008  | 42.0% | Very low |
| Yamamoto<br>(2021) | RCT | Predialysis | 10(392) | AE    | -             | SBP                 | SMD:-0.75(-1.24,-0.26) | Moderate | 0.003  | 80.3% | Very low |
|                    |     |             | 10(365) |       |               | VO <sub>2peak</sub> | SMD:0.54(0.29,0.78)    | Moderate | <0.001 | 24.6% | Very low |
|                    |     |             | 10(414) |       |               | BMI                 | SMD:-0.19(-0.38,-0.00) | Small    | 0.026  | 0.0%  | Low      |
| Thompson<br>(2019) | RCT | Predialysis | 10(335) | Mixed | -             | SBP                 | MD:-4.3(-9.0,0.4)      | -        | N.P.   | 50.4% | Very low |
|                    |     |             | 8(303)  |       |               | DBP                 | MD:-1.18(-4.76,2.40)   | -        | N.P.   | 60.5% | Very low |
| Yang<br>(2017)     | RCT | Mixed       | 4(150)  | Mixed | -             | VO <sub>2peak</sub> | SMD:0.33(0.03,0.63)    | Small    | 0.003  | 47.0% | Low      |
| Clarkson<br>(2019) | RCT | Dialysis    | 18(744) | Mixed | -             | 6MWT                | MD:33.64(23.74,43.54)  | -        | <0.001 | 0.0%  | Moderate |
| Zhao<br>(2019)     | RCT | Dialysis    | 3(141)  | Mixed | -             | Fatigue             | SMD:-0.97(-1.32,-0.62) | Large    | <0.001 | 47.0% | Low      |
|                    |     |             | 5(186)  |       |               | PCS                 | SMD:0.31(0.02,0.61)    | Small    | 0.04   | 46.0% | Low      |
|                    |     |             | 5(186)  |       |               | MCS                 | SMD:0.30(-0.20,0.80)   | Small    | 0.24   | 64.0% | Very low |
| Zhang<br>(2019)    | RCT | Predialysis | 14(463) | Mixed | -             | SBP                 | SMD:-0.41(-0.70,-0.11) | Small    | 0.007  | 55.0% | Moderate |
|                    |     |             | 12(399) |       |               | DBP                 | SMD:-0.31(-0.71,0.08)  | Small    | 0.12   | 70.0% | Low      |
|                    |     |             | 13(466) |       |               | BMI                 | SMD:-0.21(-0.39,-0.03) | Small    | 0.02   | 0.0%  | Moderate |

|                  |               |       |         |       |   |                     |                        |          |        |       |          |
|------------------|---------------|-------|---------|-------|---|---------------------|------------------------|----------|--------|-------|----------|
| Huang (2019)     | RCT           | HD    | 8(257)  | Mixed | - | Kt/V                | SMD:0.19(-0.06,0.43)   | Small    | 0.14   | 0.0%  | Very low |
|                  |               |       | 7(260)  |       |   | SBP                 | SMD:-0.17(-0.41,0.08)  | Small    | 0.18   | 8.0%  | Low      |
|                  |               |       | 7(260)  |       |   | DBP                 | SMD:-0.23(-0.69,0.24)  | Small    | 0.34   | 68.0% | Very low |
|                  |               |       | 7(205)  |       |   | 6MWT                | SMD:1.01(0.26,1.76)    | Large    | 0.008  | 83.0% | Very low |
|                  |               |       | 7(263)  |       |   | PCS                 | SMD:0.34(0.09,0.59)    | Small    | 0.007  | 27.0% | Low      |
|                  |               |       | 7(263)  |       |   | MCS                 | SMD:0.27(0.02,0.51)    | Small    | 0.03   | 0.0%  | Low      |
|                  |               |       | 10(371) |       |   | VO <sub>2peak</sub> | SMD:0.73(0.52,0.95)    | Moderate | <0.001 | 71.0% | Low      |
| Heiwe (2011)     | RCT/quasi-RCT | Mixed | 24(847) | Mixed | - | Aerobic capacity    | SMD:-0.56(-0.70,-0.42) | Moderate | <0.001 | 12.0% | Moderate |
|                  |               |       | 9(358)  |       |   | Muscle strength     | SMD:-0.52(-0.73,-0.31) | Moderate | <0.001 | 0.0%  | Low      |
|                  |               |       | 7(191)  |       |   | Walking capacity    | SMD:-0.48(-0.79,-0.17) | Small    | 0.003  | 2.0%  | Low      |
|                  |               |       | 9(347)  |       |   | SBP                 | SMD:0.25(0.04,0.47)    | Small    | 0.02   | 0.0%  | Low      |
|                  |               |       | 11(419) |       |   | DBP                 | SMD:0.16(-0.04,0.36)   | Small    | 0.11   | 40.0% | High     |
| Heiwe (2014)     | RCT           | HD    | 21(374) | Mixed | - | Aerobic capacity    | SMD:-0.80(-1.02,-0.58) | Large    | <0.001 | 0.0%  | Low      |
|                  |               |       | 10(212) |       |   | DBP                 | SMD:0.17(-0.16,0.49)   | Small    | 0.3    | 45.0% | Low      |
|                  |               |       | 10(312) |       |   | SBP                 | SMD:0.04(-0.4,0.41)    | Small    | 0.8    | 58.0% | Very low |
|                  |               |       | 10(385) |       |   | Muscle strength     | SMD:-0.56(-0.77,-0.35) | Moderate | <0.001 | 0.0%  | Very low |
|                  |               |       | 7(174)  |       |   | Walking capacity    | SMD:-0.33(-0.67,0.01)  | Small    | 0.06   | 16.0% | Low      |
| Matsuzawa (2017) | RCT           | HD    | 18(582) | Mixed | - | VO <sub>2peak</sub> | SMD:0.62(0.38,0.87)    | Moderate | <0.001 | 49.0% | High     |
|                  |               |       | 10(326) |       |   | 6MWT                | SMD:0.58(0.24,0.93)    | Moderate | <0.001 | 53.0% | Low      |
|                  |               |       | 9(281)  |       |   | Muscle strength     | SMD:0.94(0.67,1.21)    | Large    | <0.001 | 10.0% | Very low |
|                  |               |       | 9(264)  |       |   | PCS                 | SMD:0.53(0.52,0.82)    | Moderate | <0.001 | 19.0% | Very low |
|                  |               |       | 8(228)  |       |   | MCS                 | SMD:0.14(-0.15,0.42)   | Small    | 0.34   | 10.0% | Very low |
| Smart (2011)     | RCT           | HD    | 8(365)  | Mixed | - | VO <sub>2peak</sub> | SMD:0.75(0.39,1.11)    | Moderate | <0.001 | 60.0% | Low      |
| Bogataj          | RCT           | HD    | 19(571) | Mixed | - | 6MWT                | SMD:0.44(0.21,0.67)    | Small    | <0.001 | 49.6% | Very low |

|                   |                 |                       |                    |          |               |                     |                        |          |        |               |                      |
|-------------------|-----------------|-----------------------|--------------------|----------|---------------|---------------------|------------------------|----------|--------|---------------|----------------------|
| (2020)            |                 |                       | 20(504)            |          |               | VO <sub>2peak</sub> | SMD:0.58(0.32,0.85)    | Moderate | <0.001 | 57.4%         | Very low             |
|                   |                 |                       | 5(461)             |          |               | STS 10              | SMD:-0.55(-1.00,-0.09) | Moderate | 0.019  | 71.6%         | Very low             |
| Sheng<br>(2014)   | RCT             | HD                    | 7(233)             | Mixed    | Intradialytic | Kt/V                | SMD:0.27(0.01,0.53)    | Small    | 0.040  | 0.0%          | Very low             |
|                   |                 |                       | 7(310)             |          |               | VO <sub>2peak</sub> | SMD:0.53(0.30,0.76)    | Moderate | <0.001 | 36.0%         | Very low             |
|                   |                 |                       | 7(256)             |          |               | PCS                 | SMD:0.30(0.05,0.55)    | Small    | 0.02   | 39.5%         | Very low             |
|                   |                 |                       | 5(167)             |          |               | MCS                 | SMD:0.14(-0.16,0.43)   | Small    | 0.37   | 14.8%         | Very low             |
|                   |                 |                       | 4(146)             |          |               | 6MWT                | SMD:0.58(0.23,0.93)    | Moderate | <0.001 | 89.7%         | Very low             |
|                   |                 |                       | 7(296)             |          |               | DBP                 | SMD:-0.24(-0.47,-0.01) | Small    | 0.04   | 52.1%         | Very low             |
|                   |                 |                       | 7(296)             |          |               | SBP                 | SMD:-0.27(-0.50,-0.04) | Small    | 0.02   | 0.0%          | Very low             |
|                   |                 |                       | 3(106)             |          |               | STS 60              | SMD:0.71(0.31,1.12)    | Moderate | <0.001 | 0.0%          | Very low             |
|                   |                 |                       | Neto<br>(2018)     |          |               | RCT                 | HD                     | 10(394)  | Mixed  | Intradialytic | VO <sub>2peak</sub>  |
| 7(187)            | PCS             | SMD:0.50(-0.19,1.18)  |                    | Moderate | 0.16          |                     |                        | 62.0%    |        |               | Very low             |
| 7(185)            | MCS             | SMD:0.39(-0.19,0.98)  |                    | Small    | 0.19          |                     |                        | 50.0%    |        |               | Very low             |
| 6(158)            | 6MWT            | SMD:0.96(0.11,1.80)   |                    | Large    | 0.03          |                     |                        | 82.0%    |        |               | Very low             |
| 9(250)            | Muscle strength | SMD:0.61(0.39,0.83)   |                    | Moderate | <0.001        |                     |                        | 58.9%    |        |               | Very low             |
| Ferrari<br>(2019) | RCT             | HD                    | 12(370)            | AE       | Intradialytic | Kt/V                | MD:0.08(0,0.15)        | -        | 0.04   | 56.0%         | Low                  |
|                   |                 |                       | 6(220)             | RT       |               | Kt/V                | MD:0.1(0,0.2)          | -        | 0.06   | 6.0%          | Very low             |
|                   |                 |                       | 5(201)             | COM      |               | VO <sub>2peak</sub> | MD:5.41(4.03,6.79)     | -        | <0.001 | 0.0%          | Low                  |
|                   |                 |                       | 7(248)             | AE       |               | VO <sub>2peak</sub> | MD:2.07(0.42,3.72)     | -        | <0.001 | 0.0%          | Very low             |
|                   |                 |                       | 6(211)             | RT       |               | 6MWT                | MD:68.5(29.05,107.96)  | -        | <0.001 | 36.0%         | Low                  |
|                   |                 |                       | 6(188)             | AE       |               | 6MWT                | MD:64.98(43.86,86.11)  | -        | <0.001 | 0.0%          | Low                  |
|                   |                 |                       | 10(332)            | AE       |               | SBP                 | MD:-10.07(16.35,-3.78) | -        | 0.002  | 44.0%         | Low                  |
|                   |                 |                       | 10(334)            | AE       |               | DBP                 | MD:-2.96(-7.71,1.78)   | -        | 0.22   | 0.0%          | Low                  |
|                   |                 |                       | Wyngaert<br>(2018) | RCT      |               | Predialysis         | 8(269)                 | AE       | -      | SBP           | SMD:0.08(-0.58,0.74) |
| 7(237)            | DBP             | SMD:-0.09(-0.78,0.59) |                    |          | Small         |                     | 0.79                   |          |        | 83%           | Very low             |

|              |     |      |         |       |   |                                   |                        |          |        |       |          |
|--------------|-----|------|---------|-------|---|-----------------------------------|------------------------|----------|--------|-------|----------|
|              |     |      | 11(325) |       |   | VO <sub>2peak</sub>               | SMD:0.99(0.49,1.48)    | Large    | <0.001 | 74.0% | Very low |
|              |     |      | 9(294)  |       |   | BMI                               | SMD:-0.36(-0.60,-0.13) | Small    | 0.002  | 48.0% | Low      |
| Oguch (2018) | RCT | KTRs | 4(182)  | Mixed | - | VO <sub>2peak</sub>               | SMD:0.38(-0.06,0.82)   | Small    | 0.09   | 45.0% | Low      |
|              |     |      | 4(179)  |       |   | HRQoL                             | SMD:0.54(0.02,1.07)    | Moderate | 0.04   | 58.0% | Very low |
| Ju (2020)    | RCT |      | 3 (115) | Mixed | - | HGS                               | SMD:0.52(0.14,0.89)    | Moderate | 0.007  | 0.0%  | Very low |
|              |     |      | 3 (387) |       |   | Symptom/problem (KDQoL)           | SMD:1.92(-1.06,4.90)   | Large    | 0.21   | 99.0% | Very low |
|              |     |      | 3 (387) |       |   | Effects of kidney disease (KDQoL) | SMD:-3.69(-8.56,1.19)  | Large    | 0.14   | 99.0% | Very low |
|              |     |      | 3 (387) |       |   | Burden of kidney disease (KDQoL)  | SMD:1.04 (-0.75,2.82)  | Large    | 0.26   | 98.0% | Very low |

Abbreviation: RCT = randomized controlled trial; AE = aerobic exercise; RT = resistance training; COM = combine; VO<sub>2peak</sub> = peak oxygen uptake; HRQoL = health-related quality of life; DBP = diastolic blood pressure; SBP = systolic blood pressure; PCS = physical component summary; MCS = mental component summary; 6MWT = 6 minutes walk test; STS 10 = sit to stand 10 test; STS 30 = sit to stand 30 test; STS 60 = sit to stand 60 test; TUGT = timed up and go test; RLS = Restless Legs Syndrome; BMI = body mass index; SMD = standardized mean difference; MD = mean difference; HD = hemodialysis; KTRs = kidney transplant recipients; SF-36 = short form-36; KDQoL = kidney disease quality of life; GRADE = Grading of Recommendations Assessment, Development, and Evaluation.

\*Number of included studies and corresponding sample size.

Mixed means aerobic exercise combined with resistance training.

**Supplementary Table S4** Results of the assessment of the methodological quality of the included meta-analyses using AMSTAR-2

| Author         | AMSTAR-2 Items |   |   |   |   |   |   |   |   |    |    |    |    |    |    |    | Score  |
|----------------|----------------|---|---|---|---|---|---|---|---|----|----|----|----|----|----|----|--------|
|                | 1              | 2 | 3 | 4 | 5 | 6 | 7 | 8 | 9 | 10 | 11 | 12 | 13 | 14 | 15 | 16 |        |
| Pei(2019)      | √              | × | √ | ○ | √ | √ | × | √ | √ | ×  | √  | ×  | ×  | ×  | √  | ×  | 53.1%  |
| Ferreira(2019) | √              | √ | √ | ○ | √ | √ | × | ○ | √ | ×  | √  | ×  | ×  | ×  | ×  | ×  | 50.0%  |
| Cheema(2014)   | √              | × | √ | √ | √ | √ | √ | √ | √ | ×  | √  | √  | √  | √  | √  | √  | 87.5%  |
| Wu(2020)       | √              | √ | √ | ○ | √ | √ | × | √ | √ | ×  | √  | √  | √  | √  | √  | √  | 84.4%  |
| Nakamura(2020) | √              | √ | √ | ○ | √ | √ | × | √ | √ | ×  | √  | √  | √  | √  | √  | √  | 84.4%  |
| Lu(2019)       | √              | × | √ | ○ | √ | × | × | ○ | ○ | ×  | √  | ×  | ×  | ×  | √  | √  | 46.9%  |
| Chen(2019)     | √              | × | √ | ○ | × | √ | × | √ | ○ | ×  | √  | ×  | ×  | ×  | ×  | √  | 43.8%  |
| Song(2018)     | √              | × | √ | ○ | √ | √ | × | √ | √ | ×  | √  | ×  | √  | √  | √  | √  | 71.9%  |
| Salhab(2021)   | √              | √ | √ | ○ | √ | √ | × | √ | × | ×  | √  | ×  | ×  | √  | ×  | ×  | 53.1%  |
| Andrade(2019)  | √              | √ | √ | ○ | √ | √ | × | √ | √ | ×  | √  | ×  | ×  | √  | ×  | √  | 65.6%  |
| Chung(2016)    | √              | × | √ | ○ | √ | √ | √ | √ | √ | ×  | √  | √  | √  | √  | √  | ×  | 78.1%  |
| Zhang(2019)    | √              | × | √ | ○ | √ | √ | × | √ | √ | ×  | √  | ×  | √  | √  | √  | ×  | 65.6%  |
| Pu(2019)       | √              | × | √ | ○ | √ | √ | × | √ | √ | ×  | √  | √  | √  | √  | ×  | √  | 71.9%  |
| Yamamoto(2021) | √              | × | √ | × | √ | √ | × | ○ | √ | ×  | √  | √  | √  | √  | √  | √  | 71.9%  |
| Thompson(2019) | √              | × | √ | ○ | √ | √ | × | √ | √ | √  | √  | √  | √  | √  | √  | √  | 84.4%  |
| Yang(2017)     | √              | × | √ | ○ | √ | √ | × | ○ | √ | ×  | √  | √  | √  | √  | √  | √  | 75.0%  |
| Clarkson(2019) | √              | × | √ | ○ | √ | √ | × | √ | √ | ×  | √  | √  | √  | √  | √  | √  | 78.1%  |
| Zhao(2019)     | √              | × | √ | ○ | √ | √ | × | √ | √ | ×  | √  | ×  | √  | ×  | ×  | √  | 59.4%  |
| Zhang(2019)    | √              | × | √ | ○ | √ | √ | × | ○ | √ | ×  | √  | √  | ×  | ×  | √  | √  | 62.5%  |
| Huang(2019)    | √              | √ | √ | ○ | √ | √ | × | √ | √ | ×  | √  | √  | ×  | ×  | √  | √  | 71.9%  |
| Heiwe(2011)    | √              | √ | √ | √ | √ | √ | √ | √ | √ | √  | √  | √  | √  | √  | √  | √  | 100.0% |
| Heiwe(2014)    | √              | √ | √ | ○ | √ | √ | √ | √ | √ | ×  | √  | ×  | √  | √  | ×  | √  | 78.1%  |

|                 |   |   |   |   |   |   |   |   |   |   |   |   |   |   |   |   |       |
|-----------------|---|---|---|---|---|---|---|---|---|---|---|---|---|---|---|---|-------|
| Matsuzawa(2017) | √ | √ | √ | ○ | √ | √ | × | √ | √ | × | √ | × | × | √ | √ | √ | 71.9% |
| Smart(2011)     | √ | × | √ | ○ | √ | × | × | ○ | ○ | × | √ | × | × | √ | × | × | 40.6% |
| Bogataj(2020)   | √ | × | √ | ○ | √ | × | × | √ | √ | × | √ | √ | × | √ | × | √ | 59.4% |
| Sheng(2014)     | √ | × | √ | ○ | √ | √ | √ | √ | √ | × | √ | × | × | √ | √ | × | 65.6% |
| Neto(2018)      | √ | × | √ | ○ | √ | √ | × | √ | √ | × | √ | × | × | × | × | √ | 53.1% |
| Ferrari(2019)   | √ | √ | √ | ○ | √ | √ | √ | √ | √ | × | √ | √ | √ | √ | √ | √ | 90.6% |
| Wyngaert(2018)  | √ | √ | √ | ○ | √ | √ | × | √ | √ | × | √ | √ | √ | √ | √ | √ | 84.4% |
| Oguchi(2018)    | √ | √ | √ | ○ | √ | √ | × | √ | √ | × | √ | √ | √ | × | √ | × | 71.9% |
| Ju(2020)        | √ | × | √ | ○ | × | × | × | √ | √ | × | √ | × | × | × | × | × | 34.4% |

√ mean yes; ○ mean partial yes; ×mean no.

1. Did the research questions and inclusion criteria for the review include the components of PICO? 2. Did the report of the review contain an explicit statement that the review methods were established prior to the conduct of the review and did the report justify any significant deviations from the protocol? 3. Did the review authors explain their selection of the study designs for inclusion in the review? 4. Did the review authors use a comprehensive literature search strategy? 5. Did the review authors perform study selection in duplicate? 6. Did the review authors perform data extraction in duplicate? 7. Did the review authors provide a list of excluded studies and justify the exclusions? 8. Did the review authors describe the included studies in adequate detail? 9. Did the review authors use a satisfactory technique for assessing the risk of bias (RoB) in individual studies that were included in the review? 10. Did the review authors report on the sources of funding for the studies included in the review? 11. If meta-analysis was performed did the review authors use appropriate methods for statistical combination of results? 12. If meta-analysis was performed, did the review authors assess the potential impact of RoB in individual studies on the results of the meta-analysis or other evidence synthesis? 13. Did the review authors account for RoB in individual studies when interpreting/ discussing the results of the review? 14. Did the review authors provide a satisfactory explanation for, and discussion of, any heterogeneity observed in the results of the review? 15. If they performed quantitative synthesis did the review authors carry out an adequate investigation of publication bias (small study bias) and discuss its likely impact on the results of the review? 16. Did the review authors report any potential sources of conflict of interest, including any funding they received for conducting the review?

**Supplementary Table S5:** Results of the assessment of the quality of evidence for each outcome of the included meta-analyses using GRADE

| Author                | Outcome                   | GRADE items       |                   |              |              |                   | Quality of the evidence |
|-----------------------|---------------------------|-------------------|-------------------|--------------|--------------|-------------------|-------------------------|
|                       |                           | Risk of bias      | Inconsistency     | Indirectness | Imprecision  | Publication bias  |                         |
| Pei (2019)            | VO <sub>2peak</sub>       | Very serious (-2) | Neutral           | Neutral      | Neutral      | Neutral           | Moderate                |
|                       | STS 60                    | Serious (-1)      | Very serious (-2) | Neutral      | Neutral      | Serious (-1)      | Very low                |
|                       | 6MWT                      | Serious (-1)      | Very serious (-2) | Neutral      | Neutral      | Serious (-1)      | Very low                |
|                       | SBP                       | Serious (-1)      | Neutral           | Neutral      | Neutral      | Not reported (-1) | Moderate                |
|                       | DBP                       | Serious (-1)      | Neutral           | Neutral      | Neutral      | Not reported (-1) | Moderate                |
|                       | Physical function (SF-36) | Serious (-1)      | Very serious (-2) | Neutral      | Serious (-1) | Serious (-1)      | Very low                |
|                       | Physical role (SF-36)     | Serious (-1)      | Very serious (-2) | Neutral      | Serious (-1) | Serious (-1)      | Very low                |
|                       | Social function (SF-36)   | Serious (-1)      | Very serious (-2) | Neutral      | Serious (-1) | Serious (-1)      | Very low                |
|                       | Pain (SF-36)              | Serious (-1)      | Serious (-1)      | Neutral      | Serious (-1) | Serious (-1)      | Very low                |
|                       | General health (SF-36)    | Serious (-1)      | Very serious (-2) | Neutral      | Serious (-1) | Serious (-1)      | Very low                |
| Mental health (SF-36) | Serious (-1)              | Very serious (-2) | Neutral           | Serious (-1) | Serious (-1) | Very low          |                         |
| Ferreira (2019)       | Kt/V                      | Very serious (-2) | Very serious (-2) | Neutral      | Serious (-1) | Not reported (-1) | Very low                |
| Cheema (2014)         | Muscle Strength           | Neutral           | Neutral           | Neutral      | Serious (-1) | Serious (-1)      | Moderate                |
|                       | HRQoL                     | Neutral           | Neutral           | Neutral      | Serious (-1) | Serious (-1)      | Moderate                |
| Wu (2020)             | SBP                       | Very serious (-2) | Serious (-1)      | Neutral      | Serious (-1) | Serious (-1)      | Very low                |
|                       | DBP                       | Very serious (-2) | Serious (-1)      | Neutral      | Serious (-1) | Serious (-1)      | Very low                |

|                    |                     |                   |                   |         |                   |              |          |
|--------------------|---------------------|-------------------|-------------------|---------|-------------------|--------------|----------|
| Nakamura<br>(2020) | VO <sub>2peak</sub> | Neutral           | Serious (-1)      | Neutral | Neutral           | Serious (-1) | Moderate |
|                    | Muscle Strength     | Very serious (-2) | Neutral           | Neutral | Serious (-1)      | Serious (-1) | Very low |
|                    | 6MWT                | Neutral           | Very serious (-2) | Neutral | Serious (-1)      | Serious (-1) | Very low |
|                    | TUGT                | Serious (-1)      | Neutral           | Neutral | Serious (-1)      | Serious (-1) | Very low |
| Lu<br>(2019)       | 6MWT                | Neutral           | Neutral           | Neutral | Serious (-1)      | Neutral      | Moderate |
|                    | STS 10              | Neutral           | Serious (-1)      | Neutral | Serious (-1)      | Serious (-1) | Very low |
|                    | HGS                 | Neutral           | Neutral           | Neutral | Serious (-1)      | Serious (-1) | Moderate |
|                    | Muscle strength     | Neutral           | Neutral           | Neutral | Serious (-1)      | Serious (-1) | Moderate |
|                    | STS 30              | Neutral           | Neutral           | Neutral | Serious (-1)      | Serious (-1) | Moderate |
| Chen<br>(2019)     | SBP                 | Serious (-1)      | Neutral           | Neutral | Serious (-1)      | Serious (-1) | Very low |
|                    | DBP                 | Serious (-1)      | Serious (-1)      | Neutral | Serious (-1)      | Serious (-1) | Very low |
|                    | BMI                 | Serious (-1)      | Neutral           | Neutral | Serious (-1)      | Serious (-1) | Very low |
|                    | VO <sub>2peak</sub> | Serious (-1)      | Neutral           | Neutral | Serious (-1)      | Serious (-1) | Very low |
| Song<br>(2018)     | RLS                 | Serious (-1)      | Serious (-1)      | Neutral | Very serious (-2) | Serious (-1) | Very low |
|                    | Fatigue             | Serious (-1)      | Neutral           | Neutral | Serious (-1)      | Serious (-1) | Very low |
| Salhab<br>(2019)   | PCS                 | Not reported (-1) | Serious (-1)      | Neutral | Very serious (-2) | Serious (-1) | Very low |
|                    | MCS                 | Not reported (-1) | Serious (-1)      | Neutral | Serious (-1)      | Serious (-1) | Very low |
| Andrade<br>(2019)  | VO <sub>2peak</sub> | Neutral           | Neutral           | Neutral | Serious (-1)      | Serious (-1) | Moderate |
| Chung<br>(2019)    | 6MWT                | Neutral           | Neutral           | Neutral | Serious (-1)      | Serious (-1) | Moderate |
|                    | VO <sub>2peak</sub> | Neutral           | Serious (-1)      | Neutral | Serious (-1)      | Serious (-1) | Very low |
|                    | PCS                 | Neutral           | Neutral           | Neutral | Serious (-1)      | Serious (-1) | Moderate |
|                    | MCS                 | Neutral           | Neutral           | Neutral | Serious (-1)      | Serious (-1) | Moderate |
| Zhang<br>(2021)    | 6MWT                | Serious (-1)      | Neutral           | Neutral | Serious (-1)      | Serious (-1) | Very low |
|                    | STS 30              | Serious (-1)      | Neutral           | Neutral | Serious (-1)      | Serious (-1) | Very low |



|                    |                     |                   |              |         |              |                   |          |
|--------------------|---------------------|-------------------|--------------|---------|--------------|-------------------|----------|
|                    | HGS                 | Serious (-1)      | Neutral      | Neutral | Serious (-1) | Serious (-1)      | Very low |
|                    | PCS                 | Very serious (-2) | Neutral      | Neutral | Serious (-1) | Serious (-1)      | Very low |
|                    | MCS                 | Very serious (-2) | Neutral      | Neutral | Serious (-1) | Serious (-1)      | Very low |
| Pu<br>(2019)       | Kt/V                | Serious (-1)      | Neutral      | Neutral | Serious (-1) | Not reported (-1) | Very low |
|                    | VO <sub>2peak</sub> | Neutral           | Serious (-1) | Neutral | Neutral      | Not reported (-1) | Moderate |
|                    | 6MWT                | Neutral           | Neutral      | Neutral | Serious (-1) | Serious (-1)      | Moderate |
|                    | PCS                 | Neutral           | Serious (-1) | Neutral | Serious (-1) | Not reported (-1) | Very low |
|                    | MCS                 | Neutral           | Neutral      | Neutral | Serious (-1) | Serious (-1)      | Moderate |
|                    | SBP                 | Serious (-1)      | Neutral      | Neutral | Serious (-1) | Serious (-1)      | Very low |
|                    | DBP                 | Serious (-1)      | Neutral      | Neutral | Serious (-1) | Serious (-1)      | Very low |
| Yamamoto<br>(2021) | SBP                 | Very serious (-2) | Serious (-1) | Neutral | Serious (-1) | Serious (-1)      | Very low |
|                    | VO <sub>2peak</sub> | Very serious (-2) | Neutral      | Neutral | Serious (-1) | Neutral           | Very low |
|                    | BMI                 | Very serious (-2) | Neutral      | Neutral | Neutral      | Neutral           | Low      |
| Thompson<br>(2019) | SBP                 | Very serious (-2) | Serious (-1) | Neutral | Serious (-1) | Serious (-1)      | Very low |
|                    | DBP                 | Very serious (-2) | Serious (-1) | Neutral | Serious (-1) | Serious (-1)      | Very low |
| Yang<br>(2017)     | VO <sub>2peak</sub> | Neutral           | Neutral      | Neutral | Serious (-1) | Serious (-1)      | Low      |
| Clarkson<br>(2019) | 6MWT                | Neutral           | Neutral      | Neutral | Neutral      | Serious (-1)      | Moderate |
| Zhao<br>(2019)     | Fatigue             | Neutral           | Neutral      | Neutral | Serious (-1) | Serious (-1)      | Low      |
|                    | PCS                 | Neutral           | Neutral      | Neutral | Serious (-1) | Serious (-1)      | Low      |
|                    | MCS                 | Neutral           | Serious (-1) | Neutral | Serious (-1) | Serious (-1)      | Very low |
| Zhang<br>(2019)    | SBP                 | Neutral           | Serious (-1) | Neutral | Neutral      | Neutral           | Moderate |
|                    | DBP                 | Neutral           | Serious (-1) | Neutral | Serious (-1) | Neutral           | Low      |
|                    | BMI                 | Serious (-1)      | Neutral      | Neutral | Neutral      | Neutral           | Moderate |

|                     |                     |                   |                   |         |                   |                   |          |
|---------------------|---------------------|-------------------|-------------------|---------|-------------------|-------------------|----------|
| Huang<br>(2019)     | Kt/V                | Very serious (-2) | Neutral           | Neutral | Serious (-1)      | Serious (-1)      | Very low |
|                     | SBP                 | Neutral           | Neutral           | Neutral | Serious (-1)      | Serious (-1)      | Low      |
|                     | DBP                 | Neutral           | Serious (-1)      | Neutral | Serious (-1)      | Serious (-1)      | Very low |
|                     | 6MWT                | Serious (-1)      | Very serious (-2) | Neutral | Serious (-1)      | Serious (-1)      | Very low |
|                     | PCS                 | Neutral           | Neutral           | Neutral | Serious (-1)      | Serious (-1)      | Low      |
|                     | MCS                 | Neutral           | Neutral           | Neutral | Serious (-1)      | Serious (-1)      | Low      |
|                     | VO <sub>2peak</sub> | Serious (-1)      | Neutral           | Neutral | Serious (-1)      | Neutral           | Low      |
| Heiwe<br>(2011)     | Aerobic capacity    | Neutral           | Neutral           | Neutral | Neutral           | Serious (-1)      | Moderate |
|                     | Muscle strength     | Neutral           | Neutral           | Neutral | Serious (-1)      | Serious (-1)      | Low      |
|                     | Walking capacity    | Neutral           | Neutral           | Neutral | Serious (-1)      | Serious (-1)      | Low      |
|                     | SBP                 | Neutral           | Neutral           | Neutral | Serious (-1)      | Serious (-1)      | Low      |
|                     | DBP                 | Neutral           | Neutral           | Neutral | Neutral           | Neutral           | High     |
| Heiwe<br>(2014)     | Aerobic capacity    | Neutral           | Neutral           | Neutral | Serious (-1)      | Not reported (-1) | Low      |
|                     | DBP                 | Neutral           | Neutral           | Neutral | Serious (-1)      | Not reported (-1) | Low      |
|                     | SBP                 | Neutral           | Serious (-1)      | Neutral | Serious (-1)      | Not reported (-1) | Very low |
|                     | Muscle strength     | Serious (-1)      | Neutral           | Neutral | Serious (-1)      | Not reported (-1) | Very low |
|                     | Walking capacity    | Neutral           | Neutral           | Neutral | Serious (-1)      | Not reported (-1) | Low      |
| Matsuzawa<br>(2017) | VO <sub>2peak</sub> | Neutral           | Neutral           | Neutral | Neutral           | Neutral           | High     |
|                     | 6MWT                | Serious (-1)      | Serious (-1)      | Neutral | Serious (-1)      | Neutral           | Very low |
|                     | Muscle strength     | Serious (-1)      | Neutral           | Neutral | Serious (-1)      | Serious (-1)      | Very low |
|                     | PCS                 | Very serious (-2) | Neutral           | Neutral | Serious (-1)      | Serious (-1)      | Very low |
|                     | MCS                 | Very serious (-2) | Neutral           | Neutral | Serious (-1)      | Serious (-1)      | Very low |
| Smart<br>(2011)     | VO <sub>2peak</sub> | Neutral           | Serious (-1)      | Neutral | Neutral           | Serious (-1)      | Low      |
| Bogataj             | 6MWT                | Serious (-1)      | Serious (-1)      | Neutral | Not reported (-1) | Not reported (-1) | Very low |

|                    |                           |                   |                   |         |                   |                   |          |
|--------------------|---------------------------|-------------------|-------------------|---------|-------------------|-------------------|----------|
| (2020)             | VO <sub>2peak</sub>       | Very serious (-2) | Serious (-1)      | Neutral | Not reported (-1) | Not reported (-1) | Very low |
|                    | STS 10                    | Neutral           | Serious (-1)      | Neutral | Not reported (-1) | Serious (-1)      | Very low |
| Sheng<br>(2014)    | Kt/V                      | Serious (-1)      | Neutral           | Neutral | Serious (-1)      | Serious (-1)      | Very low |
|                    | VO <sub>2peak</sub>       | Serious (-1)      | Neutral           | Neutral | Serious (-1)      | Serious (-1)      | Very low |
|                    | PCS                       | Serious (-1)      | Neutral           | Neutral | Serious (-1)      | Serious (-1)      | Very low |
|                    | MCS                       | Serious (-1)      | Neutral           | Neutral | Serious (-1)      | Serious (-1)      | Very low |
|                    | 6MWT                      | Serious (-1)      | Very serious (-2) | Neutral | Serious (-1)      | Serious (-1)      | Very low |
|                    | DBP                       | Serious (-1)      | Serious (-1)      | Neutral | Serious (-1)      | Serious (-1)      | Very low |
|                    | SBP                       | Serious (-1)      | Neutral           | Neutral | Serious (-1)      | Serious (-1)      | Very low |
|                    | STS60                     | Serious (-1)      | Neutral           | Neutral | Serious (-1)      | Serious (-1)      | Very low |
| Neto<br>(2018)     | VO <sub>2peak</sub>       | Serious (-1)      | Very serious (-2) | Neutral | Serious (-1)      | Not reported (-1) | Very low |
|                    | PCS                       | Serious (-1)      | Serious (-1)      | Neutral | Serious (-1)      | Serious (-1)      | Very low |
|                    | MCS                       | Serious (-1)      | Serious (-1)      | Neutral | Serious (-1)      | Serious (-1)      | Very low |
|                    | 6MWT                      | Serious (-1)      | Very serious (-2) | Neutral | Serious (-1)      | Serious (-1)      | Very low |
|                    | Muscle strength           | Neutral           | Serious (-1)      | Neutral | Serious (-1)      | Serious (-1)      | Very low |
| Ferrari<br>(2019)  | Kt/V (AE)                 | Neutral           | Serious (-1)      | Neutral | Serious (-1)      | Neutral           | Low      |
|                    | Kt/V (RT)                 | Serious (-1)      | Neutral           | Neutral | Serious (-1)      | Serious (-1)      | Very low |
|                    | VO <sub>2peak</sub> (COM) | Neutral           | Neutral           | Neutral | Serious (-1)      | Serious (-1)      | Low      |
|                    | VO <sub>2peak</sub> (AE)  | Serious (-1)      | Neutral           | Neutral | Serious (-1)      | Serious (-1)      | Very low |
|                    | 6MWT (RT)                 | Neutral           | Neutral           | Neutral | Serious (-1)      | Serious (-1)      | Low      |
|                    | 6MWT(AE)                  | Neutral           | Neutral           | Neutral | Serious (-1)      | Serious (-1)      | Low      |
|                    | SBP                       | Serious (-1)      | Neutral           | Neutral | Serious (-1)      | Neutral           | Low      |
|                    | DBP                       | Serious (-1)      | Neutral           | Neutral | Serious (-1)      | Neutral           | Low      |
| Wyngaert<br>(2018) | SBP                       | Serious (-1)      | Serious (-1)      | Neutral | Serious (-1)      | Serious (-1)      | Very low |
|                    | DBP                       | Serious (-1)      | Very serious (-2) | Neutral | Serious (-1)      | Serious (-1)      | Very low |

|                  |                                      |                   |                   |         |              |                   |          |
|------------------|--------------------------------------|-------------------|-------------------|---------|--------------|-------------------|----------|
|                  | VO <sub>2peak</sub>                  | Serious (-1)      | Very serious (-2) | Neutral | Serious (-1) | Neutral           | Very low |
|                  | BMI                                  | Serious (-1)      | Neutral           | Neutral | Serious (-1) | Neutral           | Low      |
| Oguchi<br>(2018) | VO <sub>2peak</sub>                  | Neutral           | Neutral           | Neutral | Serious (-1) | Serious (-1)      | Low      |
|                  | HRQoL                                | Serious (-1)      | Serious (-1)      | Neutral | Serious (-1) | Serious (-1)      | Very low |
| Ju<br>(2020)     | HGS                                  | Very serious (-2) | Neutral           | Neutral | Serious (-1) | Neutral           | Very low |
|                  | Symptom/problem<br>(KDQoL)           | Very serious (-2) | Very serious (-2) | Neutral | Serious (-1) | Not reported (-1) | Very low |
|                  | effects of kidney<br>disease (KDQoL) | Very serious (-2) | Very serious (-2) | Neutral | Serious (-1) | Not reported (-1) | Very low |
|                  | burden of kidney<br>disease (KDQoL)  | Very serious (-2) | Very serious (-2) | Neutral | Serious (-1) | Not reported (-1) | Very low |

Abbreviation: AE = aerobic exercise; RT = resistance training; COM = combine; VO<sub>2peak</sub> = peak oxygen uptake; HRQoL = health-related quality of life; DBP = diastolic blood pressure; SBP = systolic blood pressure; PCS = physical component summary; MCS = mental component summary; 6MWT = 6 minutes walk test; STS 10 = sit to stand 10 test; STS 30 = sit to stand 30 test; STS 60 = sit to stand 60 test; TUGT = timed up and go test; BMI = body mass index; SMD = standardized mean difference; HD = hemodialysis; KTRs = kidney transplant recipients; SF-36 = short form-36; KDQoL = kidney disease quality of life;

Very serious mean the included studies existed two or more high risk of bias in terms of randomization, blinding, allocation concealment, completeness of result data, or selective reporting, or  $75\% \leq I^2 \leq 100\%$ .

Serious mean the included studies existed two or more high risk of bias in terms of randomization, blinding, allocation concealment, completeness of result data, or selective reporting, or  $50\% \leq I^2 < 75\%$ , or the included study sample size < 400, asymmetric funnel plot or less than 9 studies included.
