# Supplementary figures and images for: Therapeutic effects of exercise interventions for patients with chronic kidney disease: an umbrella review of systematic reviews and meta-analyses
Source: PubMed Central journal article supplement — BMJ Open. 2022 Sep 19;12(9):e054887. doi: 10.1136/bmjopen-2021-054887 (PMC9486234; doi:10.1136/bmjopen-2021-054887), 2022-09-19

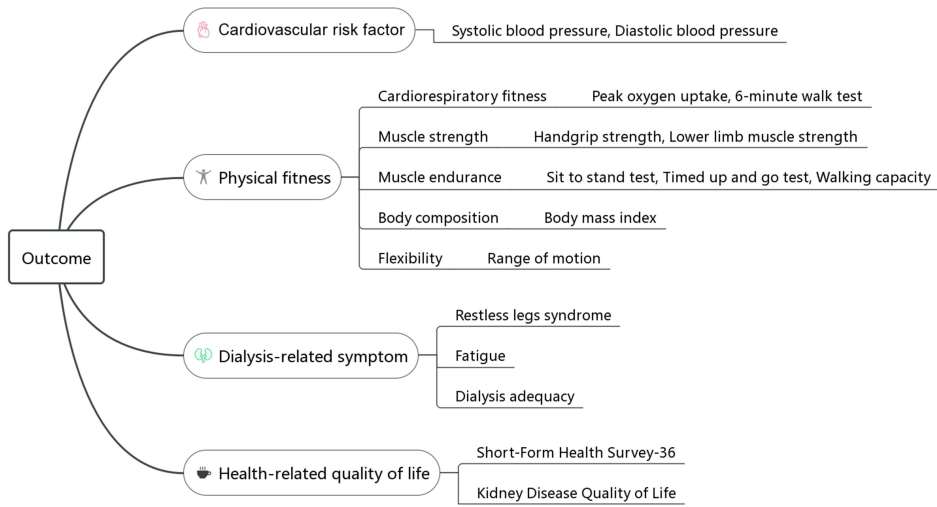

### Supplemental Figures S1

Supplement: bmjopen-2021-054887supp001.pdf [file bmjopen-2021-054887supp001.pdf]
